# Supplementary material for: Structural and functional properties of the transporter SLC26A6 reveal mechanism of coupled anion exchange
Source: eLife. 2023 Jun 23;12:RP87178. doi: 10.7554/eLife.87178 (PMC10328499; doi:10.7554/eLife.87178)
Supplement: Figure 1—source data 1. [file elife-87178-fig1-data1.xlsx]

## Sheet: Figure 1a
Figure 1a Source Data
Mean Voltage		Mean Current Density (pA/pF)		SEM
-100.077		-164.401		50.585
-80.073		-130.447		39.879
-60.1095		-97.6649		29.4575
-40.1103		-64.7043		19.504
-20.1263		-33.2993		9.44242
-0.127157		-0.708257		0.589313
19.8669		30.0207		9.57788
39.8661		59.848		18.5963
59.8246		89.3084		27.3493
79.8391		119.316		36.5367
99.8383		146.388		44.3627
150mM Chloride (Pipette)/150mM Chloride (Bath)									150mM Chloride (Pipette)/150mM Chloride (Bath)									150mM Chloride (Pipette)/150mM Chloride (Bath)
mSLC26A9				Cm	9.55	pF			mSLC26A9				Cm	10.59	pF			mSLC26A9				Cm	10.51	pF
Current	Voltage	CD (pA/pF)							Current	Voltage	CD (pA/pF)							Current	Voltage	CD (pA/pF)
-1026.61	-100.067	-107.499							-633.545	-100.067	-59.8248							-1347.66	-100.067	-128.226
-822.144	-80.0781	-86.0883							-505.981	-80.0476	-47.7792							-1097.41	-80.0476	-104.416
-622.559	-60.1196	-65.1894							-388.794	-60.0891	-36.7133							-809.326	-60.0891	-77.0053
-418.701	-40.1306	-43.8431							-258.179	-40.1001	-24.3795							-534.058	-40.1001	-50.8142
-215.454	-20.1416	-22.5606							-151.367	-20.1416	-14.2934							-281.372	-20.1416	-26.7718
-9.15527	-0.12207	-0.958667							-21.9727	-0.12207	-2.07485							-24.4141	-0.12207	-2.32294
178.833	19.8364	18.726							90.332	19.8669	8.52994							234.985	19.8669	22.3583
379.639	39.856	39.7527							192.261	39.856	18.1549							465.088	39.856	44.2519
563.965	59.8145	59.0539							313.721	59.8145	29.6242							693.359	59.8145	65.9714
750.732	79.834	78.6107							417.48	79.834	39.4221							916.138	79.834	87.1682
929.565	99.8535	97.3367							534.668	99.8535	50.488							1138.92	99.8535	108.365
150mM Chloride (Pipette)/150mM Chloride (Bath)									150mM Chloride (Pipette)/150mM Chloride (Bath)									150mM Chloride (Pipette)/150mM Chloride (Bath)
mSLC26A9				Cm	14.02	pF			mSLC26A9				Cm	20.46	pF			mSLC26A9				Cm	20.46	pF
Current	Voltage	CD (pA/pF)							Current	Voltage	CD (pA/pF)							Current	Voltage	CD (pA/pF)
-853.882	-100.098	-60.9046							-5398.56	-100.067	-263.859							-7490.23	-100.098	-366.092
-650.024	-80.0476	-46.3641							-4296.88	-80.1086	-210.013							-5892.94	-80.1086	-288.023
-502.319	-60.1196	-35.8288							-3230.59	-60.1196	-157.898							-4365.23	-60.1196	-213.355
-327.759	-40.1001	-23.3779							-2138.67	-40.1001	-104.529							-2890.62	-40.1306	-141.282
-185.547	-20.1111	-13.2344							-1071.17	-20.1111	-52.3542							-1444.09	-20.1111	-70.5812
13.4277	-0.152588	0.957756							21.3623	-0.12207	1.0441							-18.3105	-0.12207	-0.894944
173.95	19.8669	12.4073							1057.74	19.8975	51.6979							1358.64	19.8669	66.4048
350.342	39.8865	24.9887							2057.5	39.8865	100.562							2687.99	39.856	131.378
525.513	59.8145	37.4831							3035.89	59.8755	148.382							3996.58	59.8145	195.336
701.904	79.834	50.0645							4144.9	79.8645	202.585							5279.54	79.834	258.042
862.427	99.823	61.514							4953.61	99.823	242.112							6516.72	99.823	318.51
Mean Voltage			Mean Current Density (pA/pF)		SEM
-100.062			-186.61		52.062
-80.073			-157.768		43.9528
-60.0993			-129.116		36.3856
-40.1204			-102.435		29.3802
-20.1365			-78.9529		23.0951
-0.127157			-58.3478		17.5639
19.8669			-40.1328		12.9144
39.856			-25.2434		9.02537
59.8246			-13.2356		6.14265
79.8442			-4.70417		4.16164
99.8433			2.48629		2.50266
150mM Chloride (Pipette)/150mM Bicarbonate (Bath)									150mM Chloride (Pipette)/150mM Bicarbonate (Bath)									150mM Chloride (Pipette)/150mM Bicarbonate (Bath)
mSLC26A9				Cm	9.55	pF			mSLC26A9				Cm	10.59	pF			mSLC26A9				Cm	10.51	pF
Current	Voltage	CD (pA/pF)							Current	Voltage	CD (pA/pF)							Current	Voltage	CD (pA/pF)
-1693.12	-100.067	-177.29							-681.763	-100.067	-64.378							-1412.35	-100.067	-134.382
-1424.56	-80.0781	-149.169							-578.613	-80.0476	-54.6377							-1178.59	-80.0476	-112.14
-1137.7	-60.1196	-119.13							-474.243	-60.0891	-44.7822							-933.228	-60.0891	-88.7942
-902.71	-40.1306	-94.5246							-371.704	-40.1001	-35.0995							-723.877	-40.1001	-68.8751
-692.139	-20.1416	-72.4753							-281.372	-20.1416	-26.5696							-532.837	-20.1416	-50.6981
-487.671	-0.12207	-51.065							-209.961	-0.12207	-19.8263							-358.887	-0.12207	-34.1472
-325.928	19.8364	-34.1286							-143.433	19.8669	-13.5442							-220.947	19.8669	-21.0226
-186.768	39.856	-19.5568							-75.6836	39.856	-7.1467							-110.474	39.856	-10.5113
-76.2939	59.8145	-7.98889							-22.583	59.8145	-2.13248							-13.4277	59.8145	-1.27762
-4.88281	79.834	-0.511289							22.583	79.834	2.13248							56.1523	79.834	5.34275
64.0869	99.8535	6.71067							56.1523	99.8535	5.30239							103.149	99.8535	9.81441
150mM Chloride (Pipette)/150mM Bicarbonate (Bath)									150mM Chloride (Pipette)/150mM Bicarbonate (Bath)									150mM Chloride (Pipette)/150mM Bicarbonate (Bath)
mSLC26A9				Cm	14.02	pF			mSLC26A9				Cm	20.46	pF			mSLC26A9				Cm	20.46	pF
Current	Voltage	CD (pA/pF)							Current	Voltage	CD (pA/pF)							Current	Voltage	CD (pA/pF)
-988.77	-100.037	-70.5256							-5850.22	-100.067	-285.934							-7921.14	-100.067	-387.153
-856.934	-80.0781	-61.1222							-4962.77	-80.1086	-242.56							-6690.06	-80.0781	-326.983
-722.656	-60.0891	-51.5447							-4111.94	-60.1196	-200.975							-5513.31	-60.0891	-269.468
-551.147	-40.1306	-39.3115							-3311.77	-40.1306	-161.865							-4397.58	-40.1306	-214.936
-425.415	-20.1111	-30.3434							-2583.62	-20.1416	-126.277							-3424.07	-20.1416	-167.354
-331.421	-0.12207	-23.6392							-1959.84	-0.152588	-95.7888							-2570.19	-0.12207	-125.62
-200.806	19.8669	-14.3228							-1397.09	19.8975	-68.2842							-1831.05	19.8669	-89.4944
-124.512	39.856	-8.88101							-938.11	39.856	-45.8509							-1217.65	39.856	-59.5138
-53.1006	59.845	-3.78749							-570.068	59.845	-27.8626							-744.019	59.8145	-36.3645
-6.10352	79.834	-0.435343							-299.683	79.8645	-14.6472							-411.377	79.8645	-20.1064
24.4141	99.823	1.74137							-32.3486	99.823	-1.58107							-144.653	99.8535	-7.07005

## Sheet: Figure 1b
Figure 1b Source Data
Mean Voltage		Mean Current Density (pA/pF)		SEM
-100.067		-17.4001		16.5587
-80.0781		-12.675		13.5642
-60.0993		-8.78094		10.2345
-40.1255		-5.62806		6.90071
-20.1111		-2.49198		3.57125
-0.116984		0.588126		0.199109
19.8822		3.44785		3.34153
39.861		6.26902		6.72797
59.8195		9.47721		10.1313
79.8238		13.2164		13.2603
99.8484		18.148		16.283
150mM Chloride (Pipette)/150mM Chloride (Bath)									150mM Chloride (Pipette)/150mM Chloride (Bath)									150mM Chloride (Pipette)/150mM Chloride (Bath)
hSLC26A6				Cm	9.95	pF			hSLC26A6				Cm	9.98	pF			hSLC26A6				Cm	10.01	pF
Current	Voltage	CD (pA/pF)							Current	Voltage	CD (pA/pF)							Current	Voltage	CD (pA/pF)
-74.4629	-100.067	-7.48371							-37.8418	-100.067	-3.79176							-60.4248	-100.067	-6.03644
-43.9453	-80.0476	-4.41661							-36.0107	-80.0476	-3.60829							-39.0625	-80.0476	-3.90235
-52.4902	-60.0891	-5.2754							-19.5312	-60.0891	-1.95704							-23.1934	-60.0891	-2.31702
-31.1279	-40.1001	-3.12844							-12.207	-40.1306	-1.22315							-14.0381	-40.1306	-1.40241
-7.93457	-20.1111	-0.797444							-7.93457	-20.0806	-0.795047							-7.32422	-20.0806	-0.73169
7.93457	-0.0915527	0.797444							1.83105	-0.12207	0.183472							6.71387	-0.12207	0.670716
17.0898	19.8975	1.71757							6.71387	19.8975	0.672732							28.6865	19.8975	2.86579
39.0625	39.8865	3.92588							9.76562	39.856	0.97852							36.6211	39.856	3.65845
42.7246	59.8145	4.29393							18.9209	59.8145	1.89588							51.2695	59.8145	5.12183
75.6836	79.834	7.60639							28.0762	79.834	2.81324							54.3213	79.834	5.4267
102.539	99.8535	10.3054							39.6729	99.8535	3.97524							86.6699	99.8535	8.65833
150mM Chloride (Pipette)/150mM Chloride (Bath)									150mM Chloride (Pipette)/150mM Chloride (Bath)									150mM Chloride (Pipette)/150mM Chloride (Bath)
hSLC26A6				Cm	20.56	pF			hSLC26A6				Cm	25.62	pF			hSLC26A6				Cm	24.8	pF
Current	Voltage	CD (pA/pF)							Current	Voltage	CD (pA/pF)							Current	Voltage	CD (pA/pF)
-628.662	-100.037	-30.577							-892.334	-100.098	-34.8296							-537.72	-100.067	-21.6822
-472.412	-80.1086	-22.9772							-613.403	-80.1086	-23.9424							-426.636	-80.1086	-17.2031
-336.304	-60.0891	-16.3572							-379.639	-60.1196	-14.8181							-296.631	-60.1196	-11.9609
-202.637	-40.1306	-9.85587							-270.386	-40.1611	-10.5537							-188.599	-40.1001	-7.60478
-100.098	-20.1416	-4.86856							-109.253	-20.1111	-4.26436							-86.6699	-20.1416	-3.49475
10.9863	-0.12207	0.534354							27.4658	-0.12207	1.07205							6.71387	-0.12207	0.27072
88.501	19.8669	4.30452							150.757	19.8669	5.88434							130.005	19.8669	5.24213
190.43	39.856	9.26214							265.503	39.856	10.3631							233.765	39.856	9.42599
324.707	59.8145	15.7931							378.418	59.8145	14.7704							371.704	59.845	14.9881
443.726	79.8035	21.582							547.485	79.834	21.3695							508.423	79.8035	20.5009
698.242	99.8535	33.9612							679.321	99.823	26.5153							631.714	99.8535	25.4723
Figure 1b Source Data
Mean Voltage			Mean Current Density (pA/pF)		SEM
-100.077			-16.9923		5.7979
-80.0934			-12.26		4.14795
-60.1196			-8.24734		3.09485
-40.1255			-4.66128		1.61415
-20.1416			-1.52743		0.819264
-0.127157			1.1059		0.497405
19.8873			4.00137		1.26653
39.856			6.46139		2.21583
59.8551			9.51333		3.07278
79.8238			13.998		4.77942
99.8484			18.9032		6.81718
150mM Chloride (Pipette)/150mM Bicarbonate (Bath)									150mM Chloride (Pipette)/150mM Bicarbonate (Bath)									150mM Chloride (Pipette)/150mM Bicarbonate (Bath)
hSLC26A6				Cm	9.95	pF			hSLC26A6				Cm	9.98	pF			hSLC26A6				Cm	10.01	pF
Current	Voltage	CD (pA/pF)							Current	Voltage	CD (pA/pF)							Current	Voltage	CD (pA/pF)
-50.0488	-100.067	-5.03003							-35.4004	-100.067	-3.54713							-88.501	-100.067	-8.84126
-45.7764	-80.0781	-4.60064							-25.0244	-80.0781	-2.50746							-49.4385	-80.0781	-4.93891
-23.8037	-60.1196	-2.39233							-20.1416	-60.1196	-2.0182							-20.1416	-60.1196	-2.01215
-27.4658	-40.1306	-2.76038							-12.8174	-40.1306	-1.28431							-3.05176	-40.1306	-0.304871
-8.54492	-20.1416	-0.858786							-5.49316	-20.1416	-0.550417							13.4277	-20.1416	1.34143
7.93457	-0.12207	0.797444							1.2207	-0.12207	0.122315							7.32422	-0.12207	0.73169
31.1279	19.8975	3.12844							4.27246	19.8975	0.428102							18.3105	19.8975	1.82923
39.6729	39.856	3.98722							6.71387	39.856	0.672732							24.4141	39.856	2.43897
50.6592	59.8755	5.09137							11.5967	59.8755	1.16199							39.6729	59.8755	3.96332
69.5801	79.834	6.99297							17.0898	79.834	1.71241							48.8281	79.834	4.87793
80.5664	99.8535	8.09713							23.8037	99.8535	2.38514							61.0352	99.8535	6.09742
150mM Chloride (Pipette)/150mM Bicarbonate (Bath)									150mM Chloride (Pipette)/150mM Bicarbonate (Bath)									150mM Chloride (Pipette)/150mM Bicarbonate (Bath)
hSLC26A6				Cm	20.56	pF			hSLC26A6				Cm	25.62	pF			hSLC26A6				Cm	24.8	pF
Current	Voltage	CD (pA/pF)							Current	Voltage	CD (pA/pF)							Current	Voltage	CD (pA/pF)
-695.19	-100.128	-33.8128							-744.019	-100.067	-29.0405							-537.72	-100.067	-21.6822
-478.516	-80.1086	-23.2741							-538.94	-80.1086	-21.0359							-426.636	-80.1086	-17.2031
-358.276	-60.1196	-17.4259							-350.342	-60.1196	-13.6745							-296.631	-60.1196	-11.9609
-169.067	-40.1001	-8.22312							-199.585	-40.1611	-7.7902							-188.599	-40.1001	-7.60478
-54.9316	-20.1416	-2.67177							-75.0732	-20.1416	-2.93026							-86.6699	-20.1416	-3.49475
64.0869	-0.12207	3.11707							40.8936	-0.152588	1.59616							6.71387	-0.12207	0.27072
172.729	19.8975	8.40124							127.563	19.8669	4.97906							130.005	19.8669	5.24213
284.424	39.856	13.8338							215.454	39.856	8.40961							233.765	39.856	9.42599
354.614	59.845	17.2478							374.756	59.8145	14.6275							371.704	59.845	14.9881
547.485	79.8035	26.6287							596.313	79.834	23.2753							508.423	79.8035	20.5009
713.501	99.8535	34.7034							939.331	99.823	36.664							631.714	99.8535	25.4723

## Sheet: Figure 1c
Figure 1c & Figure 5d
		mSLC26A9	hSLC26A6 R404V	hSLC26A6		Surface to Input Ratio	mSLC26A9	hSLC26A6 R404V	hSLC26A6
	Clarified Lysate	23762	32317	12389			0.647757	0.763743	1.134
	Flow-through	13504	20541	5191
	Eluted Surface	7270	21249	11213

## Sheet: Figure 1d
Figure 1D		hSLC26A6 (Cl-)		Raw Data		hSLC26A6 (Cl-)		Normalised Data					Figure 1D		mSLC26A9 (Cl-)		Raw Data						mSLC26A9 (Cl-)		Normalised Data
Average [s]		n1	n2	n3		n1	n2	n3		Mean	SEM		Time [s]		n1	n2	n3	n4	n5	n6	n7		n1	n2	n3	n4	n5	n6	n7		Mean	SEM
0		11723	12862	9793		99.4823	99.9223	131.467		110.291	10.5891		0		11748	13873	19165	21538	20377	21122	17432		111.334	122.477	131.863	142.184	138.638	123.419	165.672		133.655	6.64362
5.0189		11840	12815	9769		100.475	99.5572	131.145		110.393	10.3797		5.0189		11730	13524	19166	20997	19594	21014	17461		111.164	119.396	131.87	138.612	133.311	122.788	165.948		131.87	6.68266
10.0204		11277	12469	9490		95.6976	96.8692	127.4		106.655	10.3776		10.0204		11789	13776	19350	20502	19409	21241	16918		111.723	121.621	133.136	135.345	132.052	124.115	160.787		131.254	5.81119
15.0191		11057	12417	9394		93.8306	96.4652	126.111		105.469	10.349		15.0191		11644	14170	18964	20650	19085	20890	17195		110.349	125.099	130.48	136.322	129.848	122.064	163.42		131.083	6.2145
20.0209		10912	12498	9373		92.6001	97.0945	125.829		105.175	10.4084		20.0209		11584	13452	18820	20918	19079	21138	16856		109.78	118.76	129.489	138.091	129.807	123.513	160.198		129.948	6.08451
25.0198		10968	12288	9600		93.0754	95.463	128.876		105.805	11.5563		25.0198		11413	13425	18816	20670	19279	20458	16726		108.16	118.522	129.462	136.454	131.168	119.54	158.962		128.895	6.15617
30.022		10874	12262	9278		92.2777	95.261	124.554		104.031	10.2975		30.022		11647	13264	18932	20702	18966	20157	16517		110.377	117.101	130.26	136.665	129.038	117.781	156.976		128.314	5.88373
35.0174		10738	11840	9359		91.1236	91.9826	125.641		102.916	11.3654		35.0174		12149	13387	18844	20662	18460	20390	16242		115.135	118.187	129.655	136.401	125.595	119.142	154.362		128.354	5.1489
40.0213		10760	11606	9131		91.3103	90.1647	122.58		101.352	10.6194		40.0213		11212	13116	18584	20460	18680	19872	16673		106.255	115.794	127.866	135.067	127.092	116.115	158.458		126.664	6.4163
45.0196		10681	11833	9086		90.6399	91.9282	121.976		101.515	10.2374		45.0196		11135	13185	18660	20187	18309	20040	16439		105.525	116.403	128.389	133.265	124.568	117.097	156.235		125.926	6.10467
50.0232		10485	11692	9140		88.9766	90.8328	122.701		100.837	10.9452		50.0232		11715	13023	18355	20017	18566	19648	16284		111.022	114.973	126.29	132.143	126.317	114.807	154.761		125.759	5.63993
55.0199		10349	11241	8994		87.8225	87.3291	120.741		98.6309	11.056		55.0199		10961	13425	18436	20104	18357	19649	16003		103.876	118.522	126.847	132.717	124.895	114.812	152.091		124.823	5.75004
99.1473		11461	12633	7672		97.259	98.1433	102.994		99.4653	1.78256		99.1473		10761	11670	14513	15453	14657	17774	10742		101.981	103.028	99.8555	102.013	99.7211	103.856	102.091		101.792	0.577412
101.218		11784	12872	7449		100	100	100		100	0		101.218		10552	11327	14534	15148	14698	17114	10522		100	100	100	100	100	100	100		100	0
103.282		11252	12521	7850		95.4854	97.2732	105.383		99.3806	3.04538		103.282		10136	11329	14231	14990	14745	16831	10316		96.0576	100.018	97.9152	98.957	100.32	98.3464	98.0422		98.5223	0.542493
105.348		11701	12664	7989		99.2957	98.3841	107.249		101.643	2.81547		105.348		10494	11239	13955	14348	15142	16596	10062		99.4503	99.2231	96.0162	94.7188	103.021	96.9732	95.6282		97.8615	1.09169
107.413		11442	12618	7796		97.0978	98.0267	104.658		99.9276	2.38052		107.413		10028	10917	14078	14476	14497	16453	10149		95.0341	96.3803	96.8625	95.5638	98.6325	96.1377	96.455		96.438	0.431633
109.478		11477	12482	7805		97.3948	96.9702	104.779		99.7147	2.5352		109.478		9961	10843	13645	14319	14095	16202	10081		94.3992	95.727	93.8833	94.5273	95.8974	94.671	95.8088		94.9877	0.305762
111.541		11451	12311	7749		97.1741	95.6417	104.027		98.9477	2.57806		111.541		9516	10524	13793	14131	14306	16492	10148		90.182	92.9107	94.9016	93.2862	97.333	96.3655	96.4455		94.4892	0.952391
113.61		11573	12659	7659		98.2094	98.3452	102.819		99.7913	1.51445		113.61		9960	10410	13176	13707	13937	15973	10212		94.3897	91.9043	90.6564	90.4872	94.8224	93.3329	97.0538		93.2352	0.905228
115.673		11355	12819	7583		96.3595	99.5883	101.799		99.2489	1.57937		115.673		9459	10249	13356	13949	13916	15792	9707		89.6418	90.4829	91.8949	92.0848	94.6795	92.2753	92.2543		91.9019	0.600281
117.765		11521	12841	7484		97.7682	99.7592	100.47		99.3324	0.808579		117.765		9499	10154	13251	13529	13791	15890	10082		90.0208	89.6442	91.1724	89.3121	93.8291	92.848	95.8183		91.8064	0.922703
120.488		11553	12918	7846		98.0397	100.357	105.33		101.242	2.15041		120.488		9578	10615	13035	13252	14060	15797	9712		90.7695	93.7141	89.6863	87.4835	95.6593	92.3045	92.3018		91.7027	1.01372
123.579		11496	12670	7726		97.556	98.4307	103.719		99.9018	1.92505		123.579		9676	10138	13095	13566	13712	15800	9385		91.6983	89.503	90.0991	89.5564	93.2916	92.3221	89.1941		90.8092	0.610041
127.21		11536	12406	7349		97.8955	96.3797	98.6575		97.6442	0.669433		127.21		9359	10059	12909	12632	13632	15349	9459		88.6941	88.8055	88.8193	83.3905	92.7473	89.6868	89.8974		88.863	1.0558
131.109		11253	12881	7631		95.4939	100.07	102.443		99.3357	2.03943		131.109		9021	10086	12362	12488	13409	15129	9368		85.4909	89.0439	85.0557	82.4399	91.2301	88.4013	89.0325		87.242	1.14026
135.434		11657	13113	7386		98.9223	101.872	99.1542		99.9829	0.947045		135.434		8821	9814	12128	12107	13610	15104	9071		83.5955	86.6425	83.4457	79.9247	92.5976	88.2552	86.2098		85.8102	1.52779
139.939		11644	12782	7080		98.8119	99.3008	95.0463		97.7197	1.34412		139.939		9229	9715	11745	11947	13399	14824	9144		87.4621	85.7685	80.8105	78.8685	91.1621	86.6191	86.9036		85.3706	1.58155
144.562		11611	12725	7473		98.5319	98.858	100.322		99.2374	0.550522		144.562		8945	9514	11815	11663	13172	14421	8794		84.7707	83.994	81.2921	76.9937	89.6176	84.2643	83.5773		83.5014	1.43992
149.31		11566	12541	7508		98.15	97.4285	100.792		98.7902	1.02236		149.31		8997	9375	12212	11341	13215	14219	8807		85.2635	82.7668	84.0237	74.868	89.9102	83.084	83.7008		83.3739	1.68767
154.226		11317	12570	7229		96.037	97.6538	97.0466		96.9125	0.471529		154.226		9274	9059	11693	10875	12669	14142	9018		87.8886	79.977	80.4527	71.7917	86.1954	82.6341	85.7061		82.0922	2.05317
159.144		11714	12916	7603		99.406	100.342	102.067		100.605	0.779478		159.144		8883	9440	11211	11022	12647	13647	8447		84.1831	83.3407	77.1364	72.7621	86.0457	79.7417	80.2794		80.4984	1.71965
164.064		11801	12799	7378		100.144	99.4329	99.0469		99.5413	0.321403		164.064		8847	9362	10913	10897	12923	14038	8583		83.8419	82.6521	75.086	71.9369	87.9235	82.0264	81.5719		80.7198	2.05106
168.98		11498	12760	7209		97.573	99.1299	96.7781		97.827	0.690684		168.98		8149	9182	11152	10787	12347	13868	8541		77.2271	81.0629	76.7304	71.2107	84.0046	81.0331	81.1728		78.9202	1.59672
173.899		11445	12898	7275		97.1232	100.202	97.6641		98.3298	0.94904		173.899		8245	8870	10714	10676	12009	13487	8251		78.1368	78.3085	73.7168	70.478	81.705	78.8068	78.4167		77.0812	1.41155
178.814		11671	12608	7285		99.0411	97.949	97.7984		98.2628	0.391548		178.814		7841	9386	11051	10511	11807	13364	8258		74.3082	82.864	76.0355	69.3887	80.3307	78.0881	78.4832		77.0712	1.65426
183.731		11700	12774	7433		99.2872	99.2387	99.7852		99.437	0.17466		183.731		8031	9047	10467	10517	11624	13289	8281		76.1088	79.8711	72.0173	69.4283	79.0856	77.6499	78.7018		76.1233	1.4919
188.648		11316	12506	7257		96.0285	97.1566	97.4225		96.8692	0.427293		188.648		8156	8684	10578	10382	11467	13471	8397		77.2934	76.6664	72.7811	68.5371	78.0174	78.7133	79.8042		75.9733	1.4966
193.569		11622	12929	6965		98.6253	100.443	93.5025		97.5235	2.07785		193.569		8275	8719	10509	10237	11402	13460	8157		78.4212	76.9754	72.3063	67.5799	77.5752	78.6491	77.5233		75.5757	1.55773
198.484		12028	12642	7111		102.071	98.2132	95.4625		98.5821	1.9165		198.484		8164	8858	10525	9984	11537	13254	7926		77.3692	78.2025	72.4164	65.9097	78.4937	77.4454	75.3279		75.0235	1.71455
203.402		11621	12955	7278		98.6168	100.645	97.7044		98.9887	0.868954		203.402		7903	8966	9992	10026	11428	12896	7949		74.8958	79.156	68.7491	66.187	77.7521	75.3535	75.5465		73.9486	1.78809
208.318		11424	12650	7357		96.945	98.2753	98.7649		97.9951	0.543731		208.318		7802	8372	10211	9897	11209	13012	7794		73.9386	73.9119	70.256	65.3354	76.2621	76.0313	74.0734		72.8298	1.4538
213.237		11730	12669	7292		99.5418	98.4229	97.8923		98.619	0.486134		213.237		7885	8871	9855	9560	11186	12335	7608		74.7252	78.3173	67.8065	63.1106	76.1056	72.0755	72.3056		72.0638	1.95708
218.154		11321	12589	7038		96.0709	97.8014	94.4825		96.1183	0.95839		218.154		7584	8561	10375	9756	10933	12542	7782		71.8726	75.5805	71.3843	64.4045	74.3843	73.285	73.9593		72.1244	1.39704
223.071		11555	12947	7158		98.0567	100.583	96.0934		98.2443	1.29932		223.071		7583	8693	9922	9728	10934	12506	7660		71.8632	76.7458	68.2675	64.2197	74.3911	73.0747	72.7998		71.6231	1.56998
227.988		11300	12559	7525		95.8927	97.5684	101.02		98.1605	1.50951		227.988		7684	8652	9887	9603	10896	12430	7718		72.8203	76.3839	68.0267	63.3945	74.1325	72.6306	73.3511		71.5342	1.65461
232.906		11815	13161	7172		100.263	102.245	96.2814		99.5965	1.75356		232.906		7604	8688	9780	9621	11035	12303	7486		72.0622	76.7017	67.2905	63.5133	75.0782	71.8885	71.1462		71.0972	1.69611
237.824		11299	12669	7277		95.8842	98.4229	97.691		97.3327	0.754428		237.824		7796	8490	9644	9427	10708	12321	7563		73.8817	74.9537	66.3548	62.2326	72.8534	71.9937	71.878		70.5926	1.73488
242.741		11400	12629	7036		96.7413	98.1122	94.4556		96.4364	1.06651		242.741		7930	8237	9686	9247	10915	12189	7481		75.1516	72.72	66.6437	61.0444	74.2618	71.2224	71.0987		70.3061	1.86199
247.659		11264	13008	6921		95.5872	101.057	92.9118		96.5185	2.39686		247.659		7661	8385	9712	9141	10516	11821	7529		72.6024	74.0267	66.8226	60.3446	71.5471	69.0721	71.5548		69.4243	1.75703
252.578		11559	12697	7118		98.0906	98.6405	95.5565		97.4292	0.949722		252.578		7692	8531	9683	8951	10462	11989	7259		72.8961	75.3156	66.6231	59.0903	71.1798	70.0538	68.9888		69.1639	1.97961
257.495		11399	12493	6781		96.7329	97.0556	91.0324		94.9403	1.95618		257.495		7806	8130	9706	9176	10601	11760	7421		73.9765	71.7754	66.7813	60.5757	72.1255	68.7157	70.5284		69.2112	1.69195
262.409		11665	12725	7286		98.9902	98.858	97.8118		98.5533	0.372719		262.409		7413	8297	9534	9615	10354	11650	7528		70.2521	73.2498	65.5979	63.4737	70.445	68.0729	71.5453		68.9481	1.30155
267.326		11277	12734	7044		95.6976	98.9279	94.563		96.3962	1.30755		267.326		7496	8397	9325	8804	10400	11739	7288		71.0387	74.1326	64.1599	58.1199	70.7579	68.593	69.2644		68.0095	2.00453
272.247		11431	12787	7021		97.0044	99.3397	94.2543		96.8661	1.46965		272.247		7662	8583	9184	9038	10651	11471	7143		72.6118	75.7747	63.1898	59.6646	72.4656	67.027	67.8863		68.3743	2.1506
277.164		11639	12907	7183		98.7695	100.272	96.4291		98.4902	1.1181		277.164		7694	8311	9475	9198	10426	11587	7188		72.9151	73.3734	65.192	60.7209	70.9348	67.7048	68.314		68.4507	1.69929
282.082		11536	12838	6712		97.8955	99.7359	90.1061		95.9125	2.95141		282.082		7702	8344	9135	9013	10345	11649	7198		72.9909	73.6647	62.8526	59.4996	70.3837	68.0671	68.409		67.9811	1.96154
286.999		11613	12518	7184		98.5489	97.2498	96.4425		97.4137	0.613563		286.999		7346	8232	9247	9089	10078	11334	7131		69.6171	72.6759	63.6232	60.0013	68.5672	66.2265	67.7723		66.9262	1.56648
291.917		11625	12479	6868		98.6507	96.9469	92.2003		95.9326	1.92989		291.917		7290	8072	9249	9095	10340	11572	6982		69.0864	71.2634	63.637	60.0409	70.3497	67.6172	66.3562		66.9073	1.4978
296.833		11804	13083	6866		100.17	101.639	92.1734		97.9941	2.94109		296.833		7494	7925	9227	8900	9973	11391	7207		71.0197	69.9656	63.4856	58.7536	67.8528	66.5595	68.4946		66.5902	1.59826
301.752		11252	13124	6755		95.4854	101.958	90.6833		96.0422	3.26653		301.752		7242	7980	9062	9040	10069	11227	6955		68.6315	70.4511	62.3504	59.6778	68.5059	65.6013	66.0996		65.9025	1.43435
306.668		11410	12975	7061		96.8262	100.8	94.7912		97.4725	1.76448		306.668		7485	7852	8922	8765	10035	11483	7061		70.9344	69.3211	61.3871	57.8624	68.2746	67.0971	67.107		65.9977	1.76257
311.585		11391	12825	7062		96.665	99.6349	94.8047		97.0348	1.40657		311.585		7745	7855	9194	8581	9891	11489	6959		73.3984	69.3476	63.2586	56.6477	67.2949	67.1322	66.1376		66.1739	1.97417
316.506		11325	12791	7489		96.1049	99.3707	100.537		98.6709	1.32643		316.506		7235	8290	9122	8813	10064	11292	6761		68.5652	73.188	62.7632	58.1793	68.4719	65.9811	64.2558		65.9149	1.81914
321.422		11436	12695	7062		97.0468	98.6249	94.8047		96.8255	1.10835		321.422		7133	7847	8929	8801	9766	11317	6930		67.5986	69.2769	61.4353	58.1001	66.4444	66.1271	65.862		64.9778	1.45943
326.341		11549	12841	6892		98.0058	99.7592	92.5225		96.7625	2.17958		326.341		7388	8043	9177	8607	9861	11022	6881		70.0152	71.0073	63.1416	56.8194	67.0908	64.4034	65.3963		65.4106	1.79497
331.259		11498	12411	6998		97.573	96.4186	93.9455		95.979	1.06998		331.259		7545	7967	8891	8561	9805	11156	6703		71.503	70.3364	61.1738	56.5157	66.7098	65.1864	63.7046		65.0185	1.9641
336.176		11793	12664	7320		100.076	98.3841	98.2682		98.9096	0.584364		336.176		7420	8094	8886	8721	9554	11143	6873		70.3184	71.4576	61.1394	57.572	65.002	65.1104	65.3203		65.1314	1.82613
341.092		11640	12893	6674		98.778	100.163	89.5959		96.179	3.31575		341.092		7259	8142	8827	8448	9641	11189	6862		68.7926	71.8813	60.7335	55.7697	65.594	65.3792	65.2157		64.7666	1.98386
346.005		11286	12641	7071		95.7739	98.2054	94.9255		96.3016	0.982903		346.005		7092	7777	8704	8626	9399	10700	6667		67.21	68.659	59.8872	56.9448	63.9475	62.5219	63.3625		63.219	1.51991
350.926		11763	12827	7183		99.8218	99.6504	96.4291		98.6337	1.10346		350.926		7099	7820	8519	8567	9690	10999	6841		67.2763	69.0386	58.6143	56.5553	65.9273	64.269	65.0162		63.8139	1.72605
355.845		11822	13165	6777		100.322	102.276	90.9787		97.8591	3.48616		355.845		7229	7751	9058	8252	9640	10917	6734		68.5083	68.4294	62.3228	54.4758	65.5872	63.7899	63.9992		63.8732	1.79893
360.767		11766	13171	7052		99.8473	102.323	94.6704		98.9468	2.25448		360.767		7095	7934	8888	8485	9705	10938	6584		67.2384	70.045	61.1532	56.014	66.0294	63.9126	62.5737		63.8523	1.7246
365.676		11582	12903	7078		98.2858	100.241	95.0195		97.8487	1.52304		365.676		6921	7745	8631	8458	9478	10813	6799		65.5895	68.3764	59.3849	55.8358	64.485	63.1822	64.617		63.0672	1.57985
370.598		11810	13127	7073		100.221	101.981	94.9523		99.0513	2.11156		370.598		6853	7716	8917	8451	9636	10879	6726		64.945	68.1204	61.3527	55.7895	65.5599	63.5678	63.9232		63.3227	1.47765
375.514		11500	12784	6957		97.59	99.3163	93.3951		96.7671	1.75813		375.514		7129	7666	8595	8401	9478	10952	6663		67.5607	67.679	59.1372	55.4595	64.485	63.9944	63.3245		63.0914	1.67413
380.432		11771	12764	6801		99.8897	99.161	91.3008		96.7838	2.74955		380.432		7269	7542	8628	8058	9627	10804	6662		68.8874	66.5843	59.3642	53.1951	65.4987	63.1296	63.315		62.8535	1.97045
385.348		11246	12740	6787		95.4345	98.9745	91.1129		95.174	2.27319		385.348		6912	7762	8487	8408	9224	10770	6724		65.5042	68.5265	58.3941	55.5057	62.7568	62.9309	63.9042		62.5032	1.64278
390.264		11800	12899	7014		100.136	100.21	94.1603		98.1686	2.00427		390.264		7165	7677	8637	8551	9157	10895	6577		67.9018	67.7761	59.4262	56.4497	62.301	63.6613	62.5071		62.8605	1.57019
395.182		11644	13007	6967		98.8119	101.049	93.5293		97.7967	2.22925		395.182		7102	7547	8667	8381	9189	10261	6694		67.3048	66.6284	59.6326	55.3274	62.5187	59.9568	63.6191		62.1411	1.59326
400.1		11460	12576	6724		97.2505	97.7004	90.2671		95.0727	2.40628		400.1		6894	7848	8367	8348	9053	10630	6582		65.3336	69.2858	57.5685	55.1096	61.5934	62.1129	62.5546		61.9369	1.77126
405.041		11492	13276	6997		97.5221	103.139	93.9321		98.1976	2.67907		405.041		7227	7427	8540	8313	9364	10353	6376		68.4894	65.569	58.7588	54.8785	63.7093	60.4943	60.5968		61.7852	1.71065
410.038		11624	12743	7099		98.6422	98.9978	95.3014		97.6471	1.17736		410.038		6996	7344	8385	8374	9080	10487	6522		66.3002	64.8362	57.6923	55.2812	61.7771	61.2773	61.9844		61.307	1.44292
415.04		11569	12933	6902		98.1755	100.474	92.6567		97.102	2.31957		415.04		6972	7180	8513	8168	9247	10368	6453		66.0728	63.3884	58.573	53.9213	62.9133	60.582	61.3286		60.9685	1.47497
420.041		10912	13031	6819		92.6001	101.235	91.5425		95.126	3.06986		420.041		6869	7484	8220	8101	8980	10201	6735		65.0967	66.0722	56.557	53.479	61.0967	59.6062	64.0087		60.8452	1.75697
425.036		11661	13090	6819		98.9562	101.694	91.5425		97.3974	3.03225		425.036		7132	7489	8217	8363	9304	10466	6606		67.5891	66.1164	56.5364	55.2086	63.3011	61.1546	62.7827		61.8127	1.73844
430.042		11189	12915	6970		94.9508	100.334	93.5696		96.2848	2.06351		430.042		6886	7787	8417	8055	9279	10478	6465		65.2578	68.7472	57.9125	53.1753	63.131	61.2247	61.4427		61.5559	1.89944
435.038		11567	12712	6783		98.1585	98.757	91.0592		95.9916	2.47223		435.038		6921	7563	8495	8391	9205	10613	6476		65.5895	66.7697	58.4492	55.3935	62.6276	62.0136	61.5472		61.77	1.48097
440.04		11618	13211	6775		98.5913	102.634	90.9518		97.3922	3.42513		440.04		6731	7585	8111	8139	9082	10460	6366		63.7889	66.9639	55.8071	53.7299	61.7907	61.1196	60.5018		60.5288	1.70783
445.042		11054	12951	6779		93.8052	100.614	91.0055		95.1415	2.853		445.042		6906	7431	8227	8148	9117	10580	6347		65.4473	65.6043	56.6052	53.7893	62.0288	61.8207	60.3212		60.8024	1.649
450.04		11566	12883	6948		98.15	100.085	93.2743		97.1699	2.02637		450.04		6770	7381	8366	7952	9204	10181	6419		64.1585	65.1629	57.5616	52.4954	62.6208	59.4893	61.0055		60.3563	1.64364
455.04		11290	13112	6897		95.8079	101.865	92.5896		96.754	2.7189		455.04		6636	7295	8297	8044	8935	10276	6292		62.8886	64.4036	57.0868	53.1027	60.7906	60.0444	59.7985		59.7307	1.41383
460.043		11159	12647	6842		94.6962	98.252	91.8513		94.9332	1.85154		460.043		6885	7476	7980	7952	8976	10263	6276		65.2483	66.0016	54.9057	52.4954	61.0695	59.9684	59.6465		59.9051	1.87109
465.046		11224	12920	6909		95.2478	100.373	92.7507		96.1238	2.24351		465.046		6712	7295	8129	8114	9149	10144	6456		63.6088	64.4036	55.9309	53.5648	62.2466	59.2731	61.3572		60.055	1.52581
470.043		11307	13361	6694		95.9521	103.799	89.8644		96.5385	4.03322		470.043		6915	7314	8240	7881	8825	10145	6212		65.5326	64.5714	56.6946	52.0267	60.0422	59.279	59.0382		59.5978	1.73426
475.042		11048	12816	6735		93.7542	99.5649	90.4148		94.578	2.67333		475.042		6780	7412	8201	7886	9049	10142	6369		64.2532	65.4366	56.4263	52.0597	61.5662	59.2614	60.5303		59.9334	1.73696
480.044		11356	12518	6885		96.368	97.2498	92.4285		95.3488	1.48216		480.044		6872	7297	7994	7943	9008	10120	6493		65.1251	64.4213	55.0021	52.436	61.2872	59.1329	61.7088		59.8733	1.78102
485.043		10991	12775	6996		93.2705	99.2464	93.9186		95.4785	1.89321		485.043		6871	7494	8007	7908	8901	10042	6166		65.1156	66.1605	55.0915	52.2049	60.5593	58.6771	58.601		59.4871	1.8971
490.045		11179	12868	6675		94.8659	99.9689	89.6093		94.8147	2.99066		490.045		6743	7392	8235	8041	8733	9995	6304		63.9026	65.26	56.6602	53.0829	59.4162	58.4025	59.9126		59.5196	1.5674
495.042		10884	13113	6851		92.3625	101.872	91.9721		95.4023	3.23696		495.042		6621	7294	8161	7774	8652	9739	6134		62.7464	64.3948	56.1511	51.3203	58.8652	56.9066	58.2969		58.383	1.63637

## Sheet: Figure 1e
Figure 1E		Lucigenin	Normalised:	SLC26A6
Time [s]		0mM							Mean	SEM		2.5mM						Mean	SEM		5mM							Mean	SEM		10mM							Mean	SEM		20mM							Mean	SEM
0		90.7749	85.8871	98.3539	110.989	88.5522	89.2508		93.968	3.81239		92	112.931	110.26	87.0307	96.5194		99.7481	5.08164		97.8916	100.045	112.295	111.656	100.486	91.5069		102.313	3.32532		92.9293	103.349	105.088	109.379	102.646	85.7143		99.851	3.58708		94.9904	117.805	111.296	104.61	105.351	95.1351		104.865	3.65736
1.89121		92.0664	86.4247	98.8683	110.714	85.1852	89.4137		93.7788	3.92697		93.6744	112.881	110.26	89.2492	98.5274		100.918	4.60825		95.6827	98.8849	113.466	116.026	101.58	91.9178		102.926	3.97703		96.2626	102.233	99.5846	106.212	103.859	89.3157		99.5777	2.48789		97.6879	119.186	107.016	100.946	104.875	100		104.952	3.16339
3.79035		91.9742	86.9624	98.1482	109.066	84.8485	88.7622		93.2935	3.67882		93.4884	111.633	108.961	91.4676	98.7952		100.869	4.05276		93.9759	97.413	112.998	113.907	99.271	95.6164		102.197	3.63375		93.5353	102.19	100.623	107.308	103.638	87.395		99.115	2.98781		93.1599	121.148	108.323	102.246	105.945	99.4595		105.047	3.87799
5.68199		92.9889	85.3943	100.103	106.868	84.5118	92.3453		93.7019	3.51257		95.6279	112.182	106.623	87.2014	97.8581		99.8985	4.35729		96.6868	100.312	112.998	113.642	102.552	90.6849		102.813	3.70561		93.5353	103.693	99.8962	106.577	102.756	86.7947		98.8754	3.0171		95.3757	121.076	111.772	106.974	103.329	99.5946		106.354	3.74976
7.58092		91.3284	88.6201	100.309	103.984	86.532	90.5537		93.5544	2.84022		93.0233	114.628	110.26	92.8328	95.8501		101.319	4.625		95.1807	99.331	110.539	112.053	104.01	95.3425		102.743	3.01469		95.6566	103.134	102.596	109.379	102.867	90.6363		100.711	2.68484		92.8709	120.058	107.729	103.31	103.448	98.7838		104.367	3.75414
9.472		89.9446	87.1416	99.8971	107.005	85.8586	87.785		92.9387	3.49072		94.2326	111.283	109.481	91.4676	93.4404		99.9808	4.27949		97.2892	97.5022	114.637	113.907	101.58	94.5206		103.239	3.60926		93.3333	100.859	101.454	109.866	101.323	90.2761		99.5185	2.82575		96.6281	115.698	105.351	102.246	106.302	96.6216		103.808	2.9189
11.3707		88.8376	84.7222	100.926	105.907	87.5421	91.6938		93.2714	3.39755		92.5581	111.683	111.429	92.3208	96.3855		100.875	4.41973		95.1807	96.5656	109.953	115.894	99.271	96.8493		102.286	3.49199		95.5556	101.546	102.388	109.866	105.292	83.7935		99.7402	3.72128		95.6647	116.57	106.064	104.492	107.016	97.2973		104.517	3.07893
13.2617		91.3284	84.543	100.309	106.593	85.6902	90.5537		93.1696	3.5202		92.7442	109.036	110.13	93.3447	95.7162		100.194	3.86894		97.992	97.636	115.457	115.629	100.121	94.3836		103.536	3.87005		97.2727	102.619	102.181	109.257	102.315	88.7155		100.393	2.80783		96.6281	118.75	109.869	105.437	104.875	98.9189		105.746	3.24912
15.1589		90.9594	84.4086	99.3827	109.478	88.8889	90.8795		93.9995	3.67715		93.7674	110.035	110.909	94.5392	97.8581		101.422	3.76067		94.9799	98.1713	109.836	115.497	101.701	94.7945		102.497	3.45463		94.7475	100.429	102.908	107.674	100.11	86.1945		98.6771	3.02884		94.605	119.113	107.491	105.792	103.567	102.432		105.5	3.27221
17.0506		91.9742	86.5143	97.1193	103.434	85.3535	90.228		92.4373	2.78812		94.4186	105.492	109.74	91.2969	97.5904		99.7076	3.44462		95.2811	98.0375	112.529	113.775	100.729	98.3562		103.118	3.25449		94.6465	101.417	101.662	108.526	104.631	87.1549		99.6728	3.11942		93.8343	116.279	108.799	105.083	106.54	95.8108		104.391	3.42012
18.9484		94.0037	86.0663	101.955	107.28	86.0269	89.9023		94.2057	3.57161		93.8605	106.091	113.507	90.785	94.6453		99.7776	4.30442		95.1807	93.711	114.754	112.848	101.215	95.8904		102.266	3.79942		93.3333	101.589	101.973	106.09	105.402	88.1153		99.4171	2.92316		92.1002	116.861	106.897	105.792	105.232	97.027		103.985	3.50589
20.8381		91.8819	85.3943	97.7366	105.907	84.1751	88.9251		92.3366	3.36629		95.1628	109.086	113.117	91.4676	95.7162		100.91	4.27216		95.4819	98.1713	114.286	116.026	103.038	95.7534		103.793	3.76669		92.7273	99.6565	99.3769	109.013	105.843	86.9148		98.922	3.33185		93.5453	116.57	108.68	104.374	103.448	96.0811		103.783	3.42576
22.7355		91.9742	86.6488	97.6337	106.868	85.1852	89.2508		92.9268	3.31804		92.8372	109.386	111.429	93.8567	93.4404		100.19	4.1869		93.9759	96.8778	114.169	112.848	99.028	93.9726		101.812	3.78343		96.2626	98.1537	102.804	108.161	102.867	86.9148		99.1937	2.98539		97.5915	114.389	105.945	104.965	107.491	96.0811		104.411	2.75446
24.6249		92.4354	84.767	99.8971	107.005	84.5118	91.6938		93.3851	3.58093		94.5116	108.387	107.662	89.2492	93.9759		98.7573	3.89442		94.1767	95.9857	115.691	117.483	102.795	94.5206		103.442	4.35373		94.0404	98.7548	102.077	108.039	105.072	86.4346		99.0695	3.21742		89.0173	114.535	110.345	104.728	104.637	98.6487		103.652	3.67227
26.5217		92.1587	84.991	96.8107	108.379	86.7003	90.0652		93.1842	3.48322		94.6047	106.39	108.701	86.6894	95.0469		98.2865	4.07851		95.2811	94.3354	115.808	114.305	102.795	94.7945		102.886	4.05705		91.9192	100.129	104.881	107.308	102.756	86.7947		98.9646	3.25623		96.2428	110.538	109.869	105.556	106.897	97.4324		104.422	2.51818
28.4115		93.7269	82.4821	102.366	108.929	84.6801	89.5765		93.6268	4.20787		91.7209	106.59	109.481	93.5154	91.4324		98.5479	3.9164		95.2811	93.7556	114.52	113.642	99.3925	95.6164		102.035	3.88565		90.9091	97.2091	103.115	108.039	103.859	89.3157		98.7412	3.07843		91.9075	112.427	109.037	103.782	107.729	99.1892		104.012	3.05348
30.3095		91.2362	86.3351	102.469	108.929	88.2155	91.3681		94.7588	3.64194		92.186	107.089	109.87	90.273	92.6372		98.4112	4.15294		92.3695	93.4433	116.393	115.099	98.6634	94.6575		101.771	4.50723		94.2424	96.9085	102.284	106.456	103.969	84.6338		98.0823	3.26296		92.3892	114.317	106.897	104.137	106.659	95.8108		103.368	3.2731
32.2008		93.5424	84.4982	96.2963	105.907	85.3535	90.5537		92.6918	3.23472		94.2326	107.339	112.208	90.273	93.5743		99.5253	4.30657		94.3775	93.0865	115.34	114.702	101.823	82.0548		100.231	5.34133		92.8283	94.7188	100.623	107.43	101.654	85.7143		97.1614	3.12723		90.5588	111.701	109.037	104.492	109.513	100.405		104.284	3.20625
34.0985		92.9889	85.9767	98.7654	104.258	84.8485	90.3909		92.8714	3.06849		92.4651	105.042	111.429	91.4676	93.9759		98.8759	3.97232		96.9879	93.5772	109.953	111.258	96.9623	83.1507		98.6483	4.31395		93.1313	98.626	100.311	108.039	103.197	87.1549		98.41	3.02127		94.7977	115.48	109.988	103.073	107.016	100.54		105.149	2.97949
35.9904		91.6974	85.3047	96.0905	106.868	85.0168	90.5537		92.5885	3.3241		95.0698	105.192	109.87	93.686	93.9759		99.5588	3.34565		95.2811	91.9269	114.169	110.861	102.187	80.8219		99.2077	5.08255		91.0101	98.9695	99.2731	107.308	106.615	87.1549		98.3885	3.31157		94.316	111.483	104.756	100.946	105.351	96.4865		102.223	2.57553
68.2266		100	100	100	100	100	100		100	0		100	100	100	100	100		100	0		100	100	100	100	100	100		100	0		100	100	100	100	100	100		100	0		100	100	100	100	100	100		100	0
70.1154		98.8007	98.6111	100.103	102.06	97.3064	101.14		99.6703	0.7194		98.7907	99.2511	95.974	97.7816	97.8581		97.9311	0.562991		99.5984	96.298	98.829	101.457	97.8129	95.4794		98.2458	0.896581		101.313	100.73	98.5462	102.68	101.433	95.6783		100.063	1.03696		100.771	98.4012	101.427	95.5083	98.9299	103.108		99.6908	1.08925
72.0121		98.893	98.5663	101.955	99.1758	93.6027	99.0228		98.5359	1.10755		98.8837	100.999	97.7922	102.048	101.74		100.293	0.834019		98.6948	101.829	101.405	100.927	101.458	97.5343		100.308	0.719228		101.01	99.0125	95.7425	98.5384	104.079	98.4394		99.4704	1.14967		100.578	98.1831	98.9299	95.7447	101.189	102.162		99.4645	0.953179
73.8991		96.4945	103.584	102.263	100.275	101.01	96.9055		100.089	1.16737		100.093	99.0514	96.3636	100.853	101.205		99.5132	0.869662		101.406	99.1525	98.1265	103.046	101.094	98.6301		100.242	0.778982		101.01	101.632	95.9502	101.096	100.331	95.7983		99.3029	1.09746		100	94.9855	100.594	96.3357	104.162	104.324		100.067	1.58028
75.7961		97.9705	100.627	104.938	98.9011	96.1279	99.8371		99.7337	1.22066		97.6744	100	98.052	100	101.874		99.5201	0.760408		103.213	98.4835	100.585	102.252	95.8688	102.192		100.432	1.13703		98.2828	102.19	95.4309	100.244	100.221	94.7179		98.5143	1.20256		100.867	98.0378	96.0761	94.4444	100.119	101.622		98.5277	1.1619
77.685		98.155	100.269	101.852	99.8626	98.3165	97.2313		99.281	0.690969		97.9535	100.449	98.1818	100.341	101.74		99.7332	0.724057		98.5944	98.8849	98.7119	101.457	102.43	97.3973		99.5793	0.787796		98.8889	104.165	98.7539	100.609	102.867	91.8367		99.52	1.76992		98.7476	98.2558	95.2438	96.8085	100	105.27		99.0543	1.41219
79.5786		98.524	101.21	101.543	100	101.683	96.9055		99.9777	0.783801		102.884	101.897	100.26	100	99.7323		100.955	0.612298		101.506	99.4202	99.6487	101.987	98.2989	96.9863		99.6411	0.771977		99.0909	98.7548	95.0156	102.436	100.331	90.1561		97.6307	1.79339		96.3391	97.311	97.8597	96.0993	99.1677	98.2432		97.5033	0.476381
81.469		100.922	102.464	101.132	101.099	96.9697	99.8371		100.404	0.766843		102.605	100.949	100.39	96.7577	95.7162		99.2834	1.30636		100.703	97.859	98.3607	98.4106	96.5978	98.9041		98.4725	0.549777		99.798	99.7853	100.519	99.7564	98.2359	93.6375		98.622	1.04271		96.2428	97.8924	100	95.8629	98.4542	103.513		98.661	1.14964
83.365		99.8155	101.075	102.881	99.4506	95.6229	97.8827		99.4546	1.0271		99.814	98.9017	99.3507	100	101.205		99.8542	0.387809		101.506	98.0375	100.585	101.457	104.131	97.9452		100.61	0.959838		97.5758	97.7673	95.1194	100.122	103.859	91.4766		97.6533	1.72428		98.7476	98.6192	95.8383	93.1442	101.189	101.487		98.1708	1.30824
85.2551		100.277	102.195	103.292	100.824	96.4647	96.5798		99.9388	1.16315		100	98.8018	96.7532	98.4642	100.669		98.9377	0.676071		100.1	100.624	103.864	101.589	98.9064	102.466		101.258	0.721854		102.121	100.73	97.6116	100.974	101.985	91.3565		99.1297	1.69105		95.8574	95.8576	102.021	97.3995	101.903	99.4595		98.7496	1.15037
87.1545		93.3579	102.195	105.144	100.687	96.8013	97.557		99.2904	1.72286		102.326	100.35	100	100.341	100		100.603	0.437454		98.996	95.7181	99.7658	98.1457	99.3925	97.9452		98.3272	0.595479		97.8788	97.295	97.7155	100	101.103	92.557		97.7581	1.20407		99.5183	94.9855	99.7622	96.6903	99.1677	102.162		98.7144	1.03019
89.0456		96.4945	99.3728	104.835	99.0385	97.1381	100		99.4799	1.20493		100.279	98.652	98.3117	100	97.8581		99.0202	0.47607		100.402	98.8849	98.1265	102.119	99.1495	98.3562		99.5063	0.615604		100	95.921	96.7809	99.1474	98.8975	90.036		96.7971	1.49079		97.5915	95.2762	100.594	98.5816	98.2164	99.5946		98.3091	0.745475
90.9416		98.7085	104.794	97.7366	100.275	95.6229	96.9055		99.007	1.32497		100	101.048	97.1429	94.3686	99.1968		98.3513	1.18384		98.0924	94.7815	95.9016	100.927	98.9064	99.0411		97.9417	0.916958		101.313	97.3379	93.8733	101.096	98.2359	91.7167		97.2622	1.57375		93.5453	95.3488	97.1462	99.6454	100	97.973		97.2765	1.0193
92.8316		100.277	100.762	103.601	98.2143	95.9596	95.6026		99.0693	1.25533		100.558	99.6505	98.1818	100.683	97.4565		99.3059	0.642882		99.8996	96.6102	97.3068	101.722	98.7849	97.1233		98.5744	0.801623		97.5758	101.031	97.1963	100.731	97.6847	93.2773		97.9159	1.15221		96.7245	94.7674	100.357	96.8085	97.9786	98.3784		97.5023	0.768284
94.7274		97.2325	101.478	101.955	100.412	95.2862	97.557		98.9868	1.09339		101.767	98.9516	100.649	99.3174	100.937		100.325	0.522588		100.703	97.2346	96.8384	102.252	104.253	96.3014		99.5969	1.34161		100.808	96.8227	95.2233	100.244	101.213	90.3962		97.4511	1.71608		97.2062	92.8779	95.9572	95.2719	99.5244	100.405		96.8738	1.13991
96.6157		98.0627	100.269	101.132	99.4506	95.4545	97.0684		98.5728	0.864903		101.861	100.2	98.961	101.707	97.992		100.144	0.755695		99.5984	95.4951	97.3068	102.252	101.094	97.5343		98.88	1.04128		97.4748	98.7548	95.7425	102.802	99.8898	91.8367		97.75	1.52947		95.4721	94.4767	95.7194	95.6265	101.903	97.1622		96.7266	1.09301
98.51		99.0775	103.719	102.263	102.06	100.842	96.7427		100.784	1.02758		103.349	101.098	97.4026	100.512	96.6533		99.803	1.23361		98.6948	97.6806	98.4778	103.709	99.1495	97.1233		99.1391	0.961004		96.5657	95.921	96.7809	100.609	98.4565	92.1969		96.755	1.14392		96.8208	95.1308	98.3353	98.818	99.5244	96.8919		97.5869	0.656552
100.398		97.3247	99.552	104.733	100	95.2862	98.0456		99.1568	1.31058		102.139	99.7504	99.0909	100.512	95.8501		99.4685	1.03774		103.112	98.5727	96.8384	100.795	98.1774	98.4931		99.3315	0.917646		98.3838	98.2396	93.2503	102.314	97.0232	93.6375		97.1414	1.37769		96.4355	92.0785	96.7895	97.7541	97.503	99.4595		96.67	1.01327
102.294		98.0627	101.523	105.453	97.9396	98.9899	97.8827		99.9752	1.23221		99.5349	102.097	102.078	98.6348	100.134		100.496	0.692249		103.514	97.5022	99.0632	98.9404	97.4484	95.4794		98.658	1.10646		99.3939	94.8046	97.1963	99.5128	100.441	91.8367		97.1976	1.35608		95.5684	90.1163	98.5731	95.3901	97.503	96.4865		95.6062	1.20226
104.183		98.893	102.15	101.852	98.2143	96.633	98.2085		99.3252	0.899676		102.233	100.3	100	98.8055	101.071		100.482	0.569557		100.301	99.4202	97.8923	100.397	99.6355	97.6712		99.2196	0.480607		94.9495	95.1481	96.8847	99.0256	98.1257	91.8367		95.9951	1.05857		93.1599	91.061	98.692	96.6903	96.6706	94.3243		95.0997	1.13398
106.082		98.8007	101.031	99.8971	98.9011	96.2963	96.2541		98.53	0.78532		100.651	98.0529	98.7013	98.1229	96.921		98.4899	0.612493		101.104	98.7511	96.37	102.517	95.8688	97.3973		98.668	1.08759		98.0808	95.6634	93.2503	97.9293	98.3462	90.7563		95.671	1.26594		92.1965	90.7703	95.1248	97.3995	100.476	100.54		96.0846	1.68468
107.974		99.262	100.986	99.4856	98.3517	99.1582	96.5798		98.9705	0.592874		103.349	98.5522	100.13	100.341	96.6533		99.8051	1.10577		104.217	94.7815	95.5503	100.662	99.3925	96.9863		98.5983	1.44818		97.6768	97.5526	95.1194	102.68	102.205	89.6759		97.4849	1.9654		93.8343	91.2064	96.3139	92.9078	100.594	94.7297		94.9311	1.33163
109.868		97.3247	103.898	101.543	99.4506	95.2862	100.163		99.6109	1.24327		104	97.354	98.4416	101.024	97.8581		99.7355	1.23928		101.807	96.8778	98.7119	99.7351	96.9623	96.0274		98.3536	0.884857		96.8687	94.2894	95.4309	99.1474	98.677	87.515		95.3214	1.73502		93.5453	90.1163	96.6706	92.7896	99.2866	96.2162		94.7708	1.33144
111.757		100.277	100.896	102.16	100.687	95.7913	96.7427		99.4257	1.03865		100.372	99.2012	101.039	103.072	95.3146		99.7997	1.28538		101.406	93.2649	95.082	100.53	98.4204	95.6164		97.3865	1.3233		97.1717	94.3753	97.8193	99.0256	100.221	88.4754		96.1813	1.73889		93.5453	95.6395	95.6005	96.6903	96.0761	94.0541		95.2676	0.495513
113.655		100.738	101.747	104.63	100.137	97.6431	98.3713		100.544	1.02435		98.7907	98.0529	98.1818	96.587	97.1888		97.7602	0.389118		102.811	99.4202	99.0632	100	100	95.0685		99.3938	1.02032		94.6465	94.2465	95.4309	102.802	100.662	92.437		96.704	1.66275		91.7148	90.625	99.8811	94.9173	99.1677	96.0811		95.3978	1.54222
115.546		99.262	101.658	101.646	98.2143	94.6128	97.3941		98.7978	1.10049		101.023	99.4508	100	99.1468	94.1098		98.7461	1.2023		102.108	94.157	96.9555	98.6755	99.514	99.452		98.4771	1.09894		94.8485	94.4182	94.3925	100.244	98.0154	93.2773		95.8659	1.09221		92.7746	88.2994	93.8169	97.1631	99.0487	90.6757		93.6297	1.6305
117.441		101.199	103.719	99.2798	100.962	95.4545	96.0912		99.4508	1.30179		101.954	98.5023	97.5325	97.7816	95.3146		98.2169	1.07529		100.703	97.5468	95.6675	98.9404	95.2612	94.6575		97.1294	0.965412		96.1616	97.2091	94.6002	101.218	95.9206	91.8367		96.1577	1.26313		94.894	91.3517	95.6005	96.6903	97.9786	92.973		94.9147	0.991228
119.327		96.8635	101.12	101.132	98.6264	95.4545	96.5798		98.296	0.986529		101.488	98.1029	98.1818	98.8055	98.1258		98.9409	0.650037		98.3936	97.1454	95.7845	97.4834	100.608	95.4794		97.4823	0.766041		96.1616	94.5041	95.4309	100.609	95.2591	89.6759		95.2734	1.42836		93.5453	89.3169	94.6492	93.4988	98.3353	95.1351		94.0801	1.19522
121.222		101.384	102.688	100.617	97.9396	92.4242	98.0456		98.8498	1.4949		99.5349	99.0015	99.7403	98.9761	95.4485		98.5402	0.787121		99.0964	94.9599	98.3607	100.265	98.0559	96.0274		97.7942	0.803004		92.3232	93.1301	94.6002	103.289	99.118	89.5558		95.336	2.04486		96.0501	90.843	98.0975	96.9267	96.5517	92.973		95.2403	1.12339
123.112		99.4465	102.464	102.881	99.7253	98.9899	100.651		100.693	0.666227		98.7907	98.4024	97.6623	98.9761	95.0469		97.7757	0.718451		100.904	96.0749	92.74	99.0729	95.2612	100.411		97.4106	1.31889		97.1717	94.547	92.731	99.2692	101.654	88.7155		95.6814	1.90856		93.3526	89.2442	94.2925	94.0898	98.8109	92.7027		93.7488	1.25936
125.007		98.9852	102.33	102.675	98.6264	96.4647	99.6743		99.7925	0.963426		101.116	98.3025	99.8701	100	94.5114		98.7601	1.15287		96.8876	96.7886	96.6042	100.927	96.7193	97.5343		97.5769	0.683241		97.9798	96.0927	92.0041	100	97.1334	87.0348		95.0408	1.93248		92.0038	90.5523	95.2438	95.7447	97.9786	92.027		93.925	1.15686
126.895		100.184	102.554	102.16	100.412	97.4748	99.1857		100.329	0.769975		103.442	97.0045	100.519	96.9283	95.1807		98.615	1.48592		97.5904	93.711	96.6042	98.4106	94.0462	96.1644		96.0878	0.769052		96.1616	93.216	93.5618	99.0256	98.2359	84.994		94.1992	2.07805		88.054	87.936	96.5517	93.7352	95.7194	93.7838		92.63	1.53243
128.79		98.524	102.778	101.955	100	96.4647	100.163		99.9807	0.935212		100.744	97.2042	97.2727	101.536	93.4404		98.0395	1.44873		100.402	94.7368	96.7213	97.0861	98.7849	93.9726		96.9506	0.985128		97.1717	93.1301	96.5732	98.173	98.8975	86.1945		95.0233	1.94491		93.9306	86.4099	94.887	93.2624	96.5517	91.2162		92.7097	1.45162
130.678		99.9077	101.031	102.058	101.374	94.4444	97.3941		99.368	1.18953		101.302	97.354	100.649	97.7816	95.9839		98.6142	1.01409		101.606	94.6922	94.3794	97.4834	100.121	96.0274		97.3851	1.20341		94.8485	94.0318	91.0696	97.9293	98.0154	87.6351		93.9216	1.64669		93.2563	87.5727	95.0059	94.4444	91.5577	88.9189		91.7927	1.23317
132.574		98.6162	102.195	103.807	100.687	94.2761	97.7199		99.5502	1.39576		101.674	98.1528	100.39	96.0751	93.9759		98.0536	1.39855		98.2932	95.7181	99.4145	96.1589	100.121	96.4384		97.6908	0.753858		93.2323	92.0567	91.9003	98.9038	98.2359	88.7155		93.8408	1.61801		92.3892	89.4622	96.3139	93.026	92.8656	87.973		92.005	1.20028
134.462		99.631	103.405	104.733	99.8626	98.6532	100.977		101.21	0.968264		98.2326	98.652	97.5325	100.341	93.4404		97.6398	1.14718		97.3896	94.157	94.9649	96.5563	94.6537	95.7534		95.5791	0.500634		96.1616	93.7742	93.5618	100.974	98.5667	86.7947		94.9722	2.00547		92.5819	86.1192	95.3627	95.0355	93.3413	91.3513		92.2986	1.37996
136.358		100.184	97.7151	102.263	99.5879	96.4647	94.2997		98.4192	1.16256		97.2093	99.1013	97.013	102.218	97.7242		98.6533	0.963058		100.301	94.0232	97.3068	97.8808	94.5322	96.1644		96.7014	0.946619		93.5353	93.3448	92.2118	100.974	98.4565	88.4754		94.4997	1.83819		91.1368	89.5349	96.3139	92.1986	94.2925	87.1622		91.7731	1.33944
138.248		97.2325	100.941	102.16	102.335	96.633	101.954		100.209	1.05765		103.535	98.4523	99.7403	95.7338	95.0469		98.5016	1.52425		97.6908	93.1311	93.4426	98.2781	96.1118	94.2466		95.4835	0.900104		94.7475	92.1855	95.6386	98.173	96.9129	88.8355		94.4155	1.39129		92.1002	87.718	96.9084	93.4988	92.1522	87.5676		91.6575	1.4566
140.144		98.0627	99.5968	100	98.6264	97.9798	102.117		99.3972	0.637342		99.5349	95.307	99.6104	98.4642	98.9291		98.3691	0.793682		98.996	92.4621	93.3255	94.3046	95.3828	95.7534		95.0374	0.938118		96.5657	91.1979	94.6002	100.122	97.4642	88.9556		94.8176	1.69024		92.4856	86.7733	94.7681	93.2624	95.9572	89.4595		92.1177	1.40049
142.037		99.5387	101.747	104.938	97.1154	95.7913	98.8599		99.6652	1.34554		100.093	96.1058	97.7922	98.4642	93.4404		97.1791	1.13242		101.606	91.7484	90.6323	98.6755	94.5322	99.589		96.1307	1.82949		95.2525	92.7866	92.6272	98.2948	98.8975	86.5546		94.0689	1.85077		91.4258	87.282	94.7681	95.3901	93.3413	89.3243		91.9219	1.29957
143.935		99.0775	101.613	104.835	99.8626	97.9798	99.5114		100.48	0.996499		100.744	98.3525	100	99.8294	96.1178		99.0088	0.820245		99.3976	91.3916	93.5597	97.7483	97.3268	97.3973		96.1369	1.23008		95.5556	92.6149	93.4579	99.7564	92.3925	86.7947		93.4287	1.73503		92.0038	88.0814	97.3841	94.799	92.6278	87.8378		92.1223	1.52541
145.826		100.553	102.016	104.115	99.4506	98.6532	100.651		100.907	0.794014		99.4419	96.9546	95.974	99.6587	95.0469		97.4152	0.923008		99.498	92.2837	94.4965	99.3377	93.5601	97.9452		96.1869	1.2777		95.6566	91.5844	92.731	96.2241	97.3539	84.8739		93.0707	1.86626		91.5222	86.7006	99.0487	90.8983	97.1462	87.4324		92.1248	2.05316
147.722		98.9852	99.1039	98.7654	101.236	97.1381	101.14		99.3948	0.637144		99.907	98.5522	98.961	97.7816	94.913		98.023	0.849699		96.8876	92.5067	95.4333	97.6159	92.2236	97.9452		95.4354	1.03369		91.8182	91.842	91.1734	99.6346	96.6924	84.2737		92.5724	2.15079		89.9807	88.0814	93.8169	92.6714	92.8656	88.3784		90.9657	1.01048
149.61		99.3542	100.045	107.51	99.1758	96.9697	102.606		100.943	1.50705		101.023	96.2057	98.7013	97.6109	91.9679		97.1018	1.50592		98.8956	95.2721	94.0281	99.2053	92.2236	98.0822		96.2845	1.17172		94.2424	92.2284	94.704	96.1023	98.8975	83.7935		93.328	2.10998		87.9576	89.6076	95.6005	94.3262	95.0059	86.8919		91.565	1.57515
151.506		98.155	97.267	101.955	96.4286	95.7913	97.557		97.8589	0.887425		103.628	97.0045	97.2727	100	95.0469		98.5904	1.48613		95.7831	92.8189	98.5948	99.2053	92.3451	95.8904		95.7729	1.15808		94.4444	90.6398	94.4964	97.0767	97.7949	85.3541		93.3011	1.89229		91.0405	86.1192	97.6219	93.3806	96.6706	86.8919		91.9541	1.97409
153.397		99.8155	101.344	98.7654	102.198	94.4444	100.489		99.5093	1.12329		98.6977	95.2571	98.7013	100	93.0388		97.139	1.29245		99.1968	90.6334	91.8033	99.8675	98.7849	96.1644		96.075	1.62624		93.2323	90.1675	94.2887	98.173	99.6692	89.3157		94.1411	1.70037		89.4027	86.4826	95.7194	93.617	93.1034	92.1622		91.7479	1.34783
155.291		97.048	101.703	104.115	97.2528	96.2963	98.3713		99.131	1.26405		101.023	94.9576	99.2208	97.099	92.9049		97.0411	1.45019		97.992	93.2649	94.2623	98.2781	95.5042	96.5753		95.9795	0.821225		93.5353	91.4556	94.081	99.6346	98.3462	85.1141		93.6945	2.12708		88.8247	86.5552	95.2438	92.435	92.7467	86.0811		90.3144	1.51639
157.18		100.092	98.3423	101.749	99.3132	97.1381	97.3941		99.0048	0.714756		97.5814	96.9546	97.2727	96.7577	93.4404		96.4014	0.753389		98.8956	95.7181	95.6675	97.0861	93.4386	96.7123		96.253	0.740222		93.9394	89.5663	92.5234	95.9805	96.3616	85.3541		92.2876	1.71753		93.1599	86.3372	91.082	92.7896	96.3139	87.973		91.2759	1.48952
159.077		101.199	99.552	102.469	98.9011	100.337	99.8371		100.383	0.52297		99.907	96.1558	97.4026	101.024	94.1098		97.7198	1.2506		98.996	89.3845	97.8923	98.0132	94.6537	98.7671		96.2845	1.52051		93.0303	87.9777	92.9387	96.5895	98.2359	86.9148		92.6145	1.84089		91.4258	84.811	94.7681	91.6076	90.6064	88.9189		90.3563	1.35465
160.968		98.0627	101.792	101.235	97.5275	97.1381	100		99.2925	0.812191		100.465	96.1058	98.8312	98.2935	93.5743		97.454	1.19452		97.2892	92.1945	95.5503	97.4834	92.1021	96.0274		95.1078	0.982606		91.8182	92.2284	94.3925	98.0512	94.2668	83.5534		92.3851	1.98343		91.4258	85.1017	95.0059	93.8534	92.5089	87.8378		90.9556	1.54299
162.865		99.0775	99.0591	104.63	97.9396	97.3064	100.326		99.723	1.06952		102.233	96.5552	95.3247	100	91.5663		97.1357	1.85497		97.3896	89.1615	94.3794	94.9669	93.0741	95.8904		94.1436	1.15883		89.798	90.7686	92.0041	100.122	93.495	87.6351		92.3038	1.76128		93.3526	83.2849	96.7895	93.3806	93.8169	88.6487		91.5455	1.96572
164.753		99.0775	99.1936	100.823	98.0769	93.4343	97.557		98.0271	1.02629		102.419	94.9076	98.961	100.171	91.4324		97.5781	1.9617		98.5944	91.1686	96.7213	97.8808	95.6258	95.8904		95.9802	1.06897		94.2424	88.8364	98.027	94.5189	95.9206	84.0336		92.5965	2.11665		92.1965	85.5378	96.0761	92.0804	94.1736	90.1351		91.6999	1.48416
166.652		99.631	99.6416	105.761	94.0934	97.4748	95.9283		98.7551	1.65329		98.4186	96.8547	98.5714	98.1229	94.5114		97.2958	0.75893		96.6868	90.4549	92.8571	96.8212	91.7375	96.7123		94.2117	1.17272		91.8182	92.0996	93.2503	96.8331	96.8026	84.7539		92.593	1.81133		90.0771	85.0291	96.195	90.1891	92.9845	90.6757		90.8584	1.50635
168.542		98.4317	97.6255	101.029	100.687	94.1077	100		98.6468	1.0545		102.791	95.8562	94.9351	97.7816	93.842		97.0411	1.57606		94.6787	92.8189	94.8478	96.6887	95.0182	95.3425		94.8991	0.50964		94.9495	90.9832	91.7965	97.3203	93.495	82.8331		91.8963	2.03538		93.9306	81.468	91.5577	91.0165	93.698	83.6487		89.2199	2.17614
170.434		96.4022	99.2832	100.617	97.8022	93.6027	101.466		98.1956	1.18613		101.488	95.9561	92.5974	96.4164	92.6372		95.8191	1.62819		98.3936	89.9643	93.4426	94.1722	92.4666	98.7671		94.5344	1.40587		92.7273	89.3087	95.0156	96.4677	96.0309	87.2749		92.8042	1.54402		89.5954	86.0465	96.7895	92.435	91.4388	88.5135		90.8031	1.5081
172.323		97.6015	95.6093	102.881	98.2143	97.6431	97.0684		98.1695	1.00936		98.9767	96.2057	94.1558	99.3174	91.4324		96.0176	1.48612		96.9879	91.2578	93.911	98.2781	94.8967	95.7534		95.1808	1.00449		92.6263	92.2284	94.4964	99.1474	96.0309	86.4346		93.494	1.7473		91.1368	84.9564	90.9631	93.9716	91.3199	87.7027		90.0084	1.2968
174.218		98.4317	101.165	101.235	94.0934	96.633	99.6743		98.5387	1.1381		98.6977	97.6036	97.4026	98.2935	95.1807		97.4356	0.610026		98.6948	90.9456	97.7752	97.6159	93.9247	95.6164		95.7621	1.19284		93.9394	89.3517	92.9387	100.487	96.8026	80.7923		92.3853	2.77774		90.0771	85.3924	96.6706	94.9173	91.082	85.2703		90.5683	1.928
176.109		97.786	100.806	104.938	93.8187	95.6229	97.7199		98.4487	1.61314		101.861	96.4054	92.8571	97.9522	95.0469		96.8244	1.51177		97.3896	90.8564	92.5058	93.6424	94.5322	96.9863		94.3188	1.038		91.0101	88.1494	91.1734	98.6602	93.3848	84.6338		91.1686	1.93975		88.5357	83.7209	90.2497	93.9716	92.6278	88.2432		89.5582	1.48579
178.006		97.6015	98.8799	98.1482	99.0385	94.4444	99.0228		97.8559	0.72104		101.581	96.9546	95.8442	97.9522	91.9679		96.86	1.55657		100	90.0089	91.2178	97.0861	93.9247	92.0548		94.0487	1.55958		90.202	89.3946	93.5618	94.6407	96.4719	84.6338		91.4841	1.75209		91.8112	85.3924	94.2925	91.4894	93.5791	87.7027		90.7112	1.41664
179.898		100.277	98.6559	100.206	98.9011	98.9899	100.163		99.5321	0.309096		100.372	94.6081	96.1039	98.6348	93.5743		96.6586	1.25938		96.3855	93.1311	94.2623	98.1457	94.7752	97.5343		95.7057	0.802849		89.2929	89.2658	94.1848	97.564	93.3848	85.9544		91.6078	1.71347		92.2929	84.811	98.8109	89.5981	96.4328	87.1622		91.518	2.20292
181.79		97.6015	97.8047	101.132	93.8187	99.6633	99.5114		98.2552	1.03518		99.907	97.4538	98.7013	100.853	94.2436		98.2318	1.14911		97.6908	90.0535	97.0726	94.8344	93.9247	97.3973		95.1622	1.1941		90.404	87.7201	90.0311	99.5128	92.5028	81.5126		90.2806	2.40612		88.343	83.3576	93.8169	89.7163	88.8228	87.5676		88.604	1.37994
183.678		97.6015	100.269	102.778	99.5879	96.2963	98.0456		99.0963	0.937165		100	95.5067	96.1039	100.683	92.6372		96.9861	1.49377		97.7912	91.0348	90.6323	96.6887	92.3451	94.6575		93.8583	1.22184		91.1111	90.5968	95.5348	94.2753	91.731	81.1525		90.7336	2.07002		89.788	83.7936	92.9845	95.2719	91.082	84.4595		89.5633	1.87961
185.571		99.7232	97.8495	102.263	96.0165	96.633	98.8599		98.5576	0.928187		98.0465	97.354	97.013	101.365	94.2436		97.6045	1.14119		95.4819	89.8751	93.4426	97.4834	92.1021	97.5343		94.3199	1.25346		93.6364	87.2477	93.8733	97.4421	92.8335	82.8331		91.311	2.1623		88.7283	83.939	92.6278	90.1891	90.7253	88.1081		89.0529	1.21132
187.461		97.9705	97.9839	104.012	99.8626	95.6229	100.163		99.2692	1.15877		98.4186	96.4553	96.7532	99.1468	93.1727		96.7893	1.03453		94.8795	89.3399	96.37	95.7616	91.2515	95.4794		93.847	1.16638		91.4141	91.4985	94.1848	96.7113	93.6053	84.3938		91.968	1.71261		88.2466	81.032	92.39	89.8345	91.5577	84.4595		87.92	1.79263
189.356		97.5092	101.927	98.7654	99.1758	96.633	96.4169		98.4045	0.837054		101.116	92.8607	95.8442	99.8294	92.5033		96.4308	1.76095		95.2811	91.347	96.9555	94.5695	89.915	94.7945		93.8104	1.07769		91.4141	87.2477	92.108	97.1985	98.3462	83.9136		91.7047	2.2738		86.4162	84.157	93.698	89.4799	89.2985	86.4865		88.256	1.36037
191.245		96.5867	99.5968	103.189	99.1758	94.6128	101.629		99.1317	1.2886		97.9535	93.7594	96.2338	101.365	91.2985		96.1221	1.7278		96.2851	89.2953	92.74	97.7483	92.9526	96.3014		94.2205	1.27927		91.1111	86.0884	91.2773	95.6151	98.7872	80.9124		90.6319	2.62742		91.3295	82.7762	92.7467	90.0709	92.5089	86.7568		89.3648	1.59053
193.141		98.0627	99.9104	100.926	96.0165	97.3064	100.163		98.7308	0.776822		97.0233	95.1073	96.1039	102.73	90.0937		96.2117	2.02254		95.1807	88.8938	92.5058	94.0397	90.0365	95.2055		92.6437	1.0928		89.899	87.8489	91.5888	98.9038	95.7001	85.3541		91.5491	2.05033		88.8247	81.5407	93.698	93.7352	90.0119	85.6757		88.9144	1.93388
195.029		96.8635	96.1918	102.366	97.9396	96.633	97.2313		97.8709	0.930757		98.3256	94.4084	98.4416	97.7816	90.7631		95.944	1.49142		93.3735	91.9715	93.6768	95.2318	90.401	95.0685		93.2872	0.756641		89.798	89.1799	93.8733	92.57	93.495	83.5534		90.4116	1.58196		89.3064	83.5029	95.2438	92.9078	90.4875	88.2432		89.9486	1.65281
196.925		97.417	97.9839	105.556	99.3132	95.7913	98.5342		99.0992	1.37921		97.9535	95.357	94.6753	96.2457	93.842		95.6147	0.705669		94.3775	90.3211	91.3349	96.1589	90.0365	95.4794		92.9514	1.10667		92.2222	86.3031	91.2773	95.9805	93.495	82.3529		90.2719	2.05144		90.5588	82.4128	93.2224	91.4894	87.7527	85.4054		88.4736	1.65992
198.815		97.9705	100.403	103.704	98.9011	94.7811	96.2541		98.6689	1.28899		96.4651	94.2087	94.2857	100.683	90.4953		95.2275	1.66746		93.5743	89.0276	94.9649	92.4503	89.915	94.2466		92.3631	0.981665		91.0101	89.0511	89.8235	93.4227	92.2823	85.7143		90.2173	1.10994		88.343	83.7209	93.3413	92.5532	90.4875	87.027		89.2455	1.47779
200.709		97.786	97.5358	102.881	101.511	94.1077	100.163		98.9974	1.29446		96.8372	92.3115	93.7662	96.7577	93.842		94.7029	0.897622		93.2731	89.2507	93.5597	91.3907	89.4289	96.1644		92.1779	1.09158		90.101	88.6647	92.2118	96.2241	92.9438	82.2329		90.3964	1.94488		88.921	81.686	89.7741	90.3073	89.1796	88.9189		88.1312	1.3079
202.597		97.6937	99.1488	99.5885	95.8791	95.9596	103.094		98.5607	1.10553		96.5581	95.4568	95.1948	98.9761	91.9679		95.6307	1.13332		97.6908	88.2694	90.9836	97.4834	90.2795	94.5206		93.2045	1.61257		91.4141	89.7381	91.0696	95.8587	92.613	80.6723		90.2276	2.09014		88.921	81.5407	96.4328	92.5532	91.082	85.2703		89.3	2.16968
204.492		94.5572	97.9391	97.3251	96.0165	98.3165	98.6971		97.1419	0.643286		98.2326	95.8063	95.7143	98.8055	92.1017		96.1321	1.18497		97.0884	89.4737	95.5503	96.1589	92.2236	94.9315		94.2377	1.16582		91.1111	88.1065	92.9387	93.5445	93.2745	83.9136		90.4815	1.55344		88.1503	81.468	91.082	90.7801	88.7039	86.4865		87.7785	1.44233
206.381		99.9077	98.7903	101.337	97.8022	96.8013	96.9055		98.5908	0.729888		99.5349	92.3615	97.7922	98.9761	92.1017		96.1533	1.62608		98.2932	91.0348	95.6675	96.4238	87.7278	96.3014		94.2414	1.63469		91.3131	86.3461	94.1848	96.8331	93.936	82.473		90.8477	2.21447		87.7649	81.8314	94.0547	90.3073	87.7527	85.6757		87.8978	1.68811
208.274		98.155	98.7903	98.3539	96.7033	98.1482	100.326		98.4127	0.478333		98.4186	93.6096	96.4935	101.707	92.5033		96.5463	1.6599		93.5743	88.6708	95.3162	92.8477	91.0085	95.0685		92.7477	1.03798		90	86.389	95.0156	96.4677	89.6362	84.8739		90.3971	1.87518		87.2832	80.3779	93.4602	90.6619	85.1367	86.7568		87.2795	1.84516
210.162		97.048	97.9391	102.778	98.9011	95.7913	101.303		98.96	1.07715		98.0465	93.36	95.5844	97.9522	94.7791		95.9444	0.91151		94.6787	89.2953	92.5058	96.9536	90.0365	95.4794		93.1582	1.25431		90.101	86.6896	93.6656	95.7369	93.3848	80.6723		90.0417	2.27868		86.1272	83.7209	92.6278	91.0165	87.7527	85.4054		87.7751	1.40028
212.059		96.1255	96.9982	102.572	99.3132	93.4343	100.977		98.2367	1.37256		98.4186	93.6595	91.4286	97.7816	90.0937		94.2764	1.66478		93.3735	87.2881	93.7939	96.8212	89.3074	96.3014		92.8143	1.55267		91.0101	86.1314	92.4195	95.9805	91.1797	80.072		89.4655	2.27925		89.5954	82.2674	91.3199	90.4255	88.9417	86.4865		88.1727	1.35783
213.953		96.1255	97.4462	101.44	98.2143	97.6431	97.557		98.0711	0.730193		97.6744	92.0619	95.4545	99.8294	91.9679		95.3976	1.54463		96.3855	90.678	92.623	93.5099	89.3074	91.6438		92.3579	1.00427		90.9091	87.0331	91.1734	95.8587	92.9438	80.7923		89.7851	2.14865		88.7283	81.1047	93.2224	89.7163	89.4174	86.2162		88.0675	1.66792
215.85		93.3579	99.4624	100.514	94.9176	97.9798	98.6971		97.4882	1.13175		99.1628	95.0574	92.4675	103.584	93.0388		96.662	2.09115		95.1807	87.6004	92.9742	92.8477	89.915	93.0137		91.9219	1.10272		89.1919	87.6771	91.0696	93.0572	92.3925	79.2317		88.77	2.07479		86.0308	79.4331	92.8656	89.0071	87.8716	87.8378		87.1744	1.80656
217.738		96.8635	99.2832	102.675	99.0385	96.8013	95.4397		98.3502	1.05083		95.5349	92.8108	94.9351	99.4881	91.834		94.9206	1.32698		95.5823	89.4291	93.7939	94.9669	89.5504	95.6164		93.1565	1.19048		90.9091	86.8184	90.4465	94.2753	91.4002	79.952		88.9669	2.04895		87.8613	80.4506	95.0059	89.2435	88.2283	85		87.6316	1.96537
219.631		96.5867	99.4176	100.514	101.374	96.1279	98.5342		98.7591	0.857186		94.6047	93.5097	97.1429	99.1468	92.1017		95.3011	1.2671		89.257	87.5112	92.0375	95.2318	88.2138	93.5616		90.9688	1.27166		92.9293	90.1245	89.7196	94.7625	92.613	82.7131		90.477	1.73126		86.8979	81.468	94.6492	90.1891	88.4661	82.1622		87.3054	2.03543
221.523		97.786	97.1326	99.4856	94.0934	95.1179	100.651		97.3778	1.02113		96	92.4613	97.7922	101.024	92.2356		95.9026	1.65978		94.1767	87.4219	93.0913	96.5563	84.4471	96.5753		92.0448	2.04626		92.2222	87.8489	91.5888	96.2241	91.1797	81.1525		90.036	2.08561		85.7418	81.6134	94.0547	90.5437	87.8716	81.2162		86.8402	2.05738
223.417		97.3247	100.896	102.881	97.2528	93.771	100.651		98.7961	1.34579		96.7442	94.3585	97.1429	101.195	91.9679		96.2816	1.53947		93.8755	87.1097	92.9742	96.6887	85.2977	92.4657		91.4019	1.76406		91.5152	85.8308	87.4351	95.2497	92.0617	83.0732		89.1943	1.84528		87.6686	81.686	92.5089	88.4161	88.1094	85.5405		87.3216	1.45807
225.305		96.4945	96.1918	98.4568	98.489	94.9495	98.5342		97.186	0.621801		96.7442	93.2102	96.8831	100.683	94.7791		96.4598	1.25453		93.7751	87.0205	94.6136	95.4967	88.3354	97.5343		92.7959	1.70549		89.798	88.7935	90.2388	94.0317	92.8335	83.5534		89.8748	1.49779		87.1869	81.6134	90.6064	92.3168	83.7099	83.3784		86.4686	1.75663
227.199		98.4317	94.2652	102.778	99.4506	98.4848	99.1857		98.766	1.11336		98.6977	93.1103	97.2727	97.4403	92.7711		95.8584	1.21753		93.4739	86.6637	93.3255	95.2318	89.6719	93.9726		92.0566	1.31836		89.0909	88.7076	94.1848	97.9293	92.5028	81.0324		90.5746	2.3635		85.4528	79.5785	96.195	90.7801	87.9905	83.9189		87.3193	2.35353
229.085		95.6642	96.1918	102.984	94.6429	93.6027	92.5081		95.9322	1.51298		99.2558	92.1118	94.026	99.1468	93.1727		95.5426	1.52422		95.4819	88.3586	93.7939	94.5695	89.1859	94.2466		92.6061	1.23783		89.2929	86.6466	94.1848	93.7881	90.1874	79.5918		88.9486	2.20106		86.5125	81.032	87.7527	87.7069	88.7039	85.8108		86.2531	1.12386
230.979		96.0332	98.8799	100	96.4286	97.9798	101.629		98.4917	0.872337		95.5349	95.1073	96.4935	98.8055	90.8969		95.3676	1.28781		96.2851	87.4219	94.0281	94.0397	89.0644	95.8904		92.7883	1.50133		89.0909	88.1065	90.9657	90.4994	93.2745	81.7527		88.9483	1.60933		89.0173	79.4331	91.7955	84.7518	84.1855	83.2432		85.4044	1.79013
232.867		97.786	97.8943	102.984	99.5879	97.3064	99.3485		99.1511	0.851727		99.4419	92.1118	97.6623	97.6109	92.2356		95.8125	1.5218		94.7791	87.1097	96.37	93.7748	89.4289	94.3836		92.641	1.4573		88.3838	87.076	90.5504	93.0572	94.7078	81.1525		89.1546	1.97456		86.8015	81.1047	90.3686	85.2246	85.1367	82.2973		85.1556	1.34746
234.764		95.7565	96.371	99.7942	93.956	95.9596	99.6743		96.9186	0.952364		95.5349	95.5067	95.8442	99.3174	92.5033		95.7413	1.08123		91.6667	87.868	94.1452	95.4967	85.0547	93.0137		91.2075	1.62798		88.1818	84.9292	86.3967	94.2753	89.9669	83.1933		87.8239	1.61452		85.2601	78.7791	92.7467	86.4066	86.5636	85.5405		85.8828	1.81493
236.648		94.4649	96.9982	100.514	96.0165	99.6633	98.0456		97.6172	0.92459		97.5814	91.4129	96.4935	97.9522	93.0388		95.2958	1.30165		93.4739	85.9054	93.0913	95.894	89.0644	93.1507		91.7633	1.47508		89.899	87.2907	90.135	92.0828	89.6362	82.593		88.6061	1.35456		85.8381	80.0872	91.082	90.5437	85.6124	83.7838		86.1579	1.69679
238.546		98.524	99.4176	102.366	95.055	95.9596	101.466		98.798	1.1885		98.3256	93.1603	100.13	99.8294	93.9759		97.0842	1.4733		92.8715	85.6378	92.623	95.894	86.7558	92.1918		90.9956	1.61529		87.7778	86.7325	87.8505	95.3715	90.2977	81.1525		88.1971	1.89695		84.5857	80.6686	90.3686	87.7069	86.8014	83.7838		85.6525	1.38144
240.435		95.941	98.0735	100.103	97.6648	94.6128	98.5342		97.4882	0.79512		97.3023	93.0604	97.7922	95.0512	91.4324		94.9277	1.2158		94.7791	87.5558	92.74	95.6291	86.5128	97.6712		92.4813	1.84459		89.1919	86.2173	87.9543	96.7113	89.6362	79.952		88.2772	2.21717		83.3333	78.6337	92.9845	89.9527	86.2069	86.7568		86.3113	2.04788
242.328		98.4317	95.8333	101.029	98.489	99.1582	98.2085		98.5249	0.683747		95.814	93.0604	95.1948	100	91.2985		95.0735	1.46861		93.4739	85.9946	88.4075	92.9801	90.401	93.1507		90.7346	1.24335		89.596	86.2602	92.5234	95.4933	89.1951	79.8319		88.8166	2.20853		83.3333	81.6134	89.0606	89.4799	85.3745	84.4595		85.5535	1.28322
244.216		94.7417	97.0878	99.6914	98.489	97.3064	92.5081		96.6374	1.06536		99.0698	95.307	94.8052	98.2935	93.9759		96.2903	1.00666		95.4819	87.1097	91.452	93.9073	88.5784	93.4247		91.659	1.32936		89.495	86.3461	89.9273	96.1023	89.3054	81.6326		88.8014	1.93843		86.7052	78.6337	92.0333	88.8889	84.1855	84.5946		85.8402	1.86744
246.111		97.9705	96.6846	102.469	94.7802	95.7913	100.651		98.0579	1.21051		98.4186	91.0135	95.4545	98.6348	91.4324		94.9908	1.63898		96.0843	87.868	90.1639	97.0861	84.5687	94.9315		91.7837	2.05372		89.495	86.1743	88.0581	94.3971	88.7541	81.7527		88.1052	1.69337		84.8748	79.9419	92.6278	89.0071	84.5422	84.0541		85.8413	1.79535
247.999		93.6347	98.2527	102.469	99.1758	93.4343	100.163		97.8549	1.4818		96.6512	92.1618	95.3247	99.3174	93.7082		95.4326	1.23005		90.7631	87.4665	93.4426	95.7616	91.0085	90.8219		91.544	1.14654		86.7677	85.9167	90.6542	92.9354	87.1003	80.4322		87.3011	1.75511		85.5491	78.7064	88.585	87.1158	82.9964	85.1351		84.6813	1.42201
249.892		97.3247	97.8047	101.132	96.0165	99.1582	98.2085		98.274	0.711113		96.4651	92.5612	95.3247	100	92.2356		95.3173	1.42018		94.4779	87.5558	91.3349	91.1258	86.0267	97.3973		91.3197	1.72368		90.404	86.0455	90.4465	94.7625	88.0926	79.7119		88.2438	2.07895		83.4297	79.9419	89.6552	91.844	86.088	84.7297		85.9481	1.75523
251.782		96.8635	97.3118	100.823	99.3132	96.8013	99.1857		98.3831	0.668858		97.3023	90.3645	92.7273	97.099	95.5823		94.6151	1.34086		91.2651	87.3773	90.5152	94.3046	87.6063	93.6986		90.7945	1.19577		89.596	88.7076	88.2658	93.9099	90.5182	80.7923		88.6316	1.76959		88.632	77.7616	87.8716	87.8251	84.6611	85.1351		85.3144	1.64674
253.678		97.417	95.2509	100.206	96.0165	94.7811	99.8371		97.2514	0.949932		94.0465	93.4099	92.3377	102.901	91.4324		94.8255	2.06793		90.4618	86.8867	90.1639	94.4371	88.2138	93.6986		90.6437	1.21113		88.8889	87.2907	88.4735	93.7881	88.3131	80.3121		87.8444	1.77083		84.4894	78.125	91.7955	90.0709	83.591	81.7568		84.9714	2.09697
255.564		100.646	97.2222	102.778	98.489	99.495	96.5798		99.2016	0.935602		96.5581	92.2616	94.9351	101.536	91.4324		95.3446	1.79974		94.2771	87.6896	93.2084	94.1722	86.7558	92.8767		91.4966	1.3747		91.2121	84.5857	89.5119	93.3008	89.7464	79.2317		87.9314	2.09973		86.8015	78.8517	93.3413	89.7163	85.8502	81.4865		86.0079	2.159
257.457		96.1255	97.2222	102.572	95.6044	96.8013	102.932		98.5428	1.35093		96.186	91.4129	95.974	96.9283	89.6921		94.0387	1.45764		96.2851	86.7975	93.6768	94.1722	86.8773	95.8904		92.2832	1.76875		87.0707	83.684	88.5774	93.0572	91.9515	84.1537		88.0824	1.58922		83.1407	78.125	93.5791	88.7707	80.3805	81.7568		84.2921	2.36215
259.344		96.1255	98.2975	101.029	94.9176	96.1279	98.3713		97.4781	0.899732		96.6512	91.4628	96.7532	98.1229	93.9759		95.3932	1.19038		94.8795	84.0321	93.2084	91.6556	88.2138	93.2877		90.8795	1.65145		88.7879	86.4749	89.6158	93.6663	93.936	80.072		88.7588	2.09999		84.7784	79.2151	90.7253	91.0165	83.3531	84.3243		85.5688	1.85939
261.239		96.7712	96.5502	100.514	97.5275	95.9596	100		97.8871	0.779833		96.2791	91.0135	98.1818	99.3174	89.826		94.9236	1.91094		92.0683	86.1285	88.7588	94.4371	86.1482	95.6164		90.5262	1.68537		89.697	85.9596	89.0966	92.6918	89.7464	77.3109		87.4171	2.20247		86.9942	77.1802	90.7253	86.7612	84.1855	82.027		84.6456	1.91272
263.127		97.3247	96.9086	100.206	96.978	98.8216	99.5114		98.2917	0.577522		95.3488	93.5097	93.5065	95.5631	91.7001		93.9257	0.707406		92.7711	86.8421	93.5597	93.7748	88.2138	95.4794		91.7735	1.40137		88.7879	87.076	89.9273	94.5189	89.1951	80.1921		88.2829	1.91134		85.0674	77.907	92.6278	88.7707	84.0666	85.4054		85.6408	2.01071
265.021		97.6015	96.9086	98.9712	98.2143	94.7811	98.3713		97.4747	0.610526		95.3488	92.4613	93.6364	96.4164	94.1098		94.3945	0.685268		90.9639	85.5932	92.5058	95.894	88.0923	96.3014		91.5584	1.73341		90.9091	87.2048	89.4081	92.4482	87.2106	83.4334		88.4357	1.30643		83.7187	77.8343	88.4661	85.1064	84.78	83.5135		83.9032	1.41485
266.909		97.2325	97.491	95.7819	97.5275	96.633	100.326		97.4986	0.626114		94.9767	92.0619	95.3247	97.6109	94.1098		94.8168	0.899443		92.1687	85.6378	92.74	96.6887	85.9052	92.8767		91.0029	1.77939		86.2626	83.9845	92.0041	95.6151	90.1874	78.1513		87.7009	2.54566		81.3102	78.561	93.3413	86.1702	83.7099	83.7838		84.4794	2.06186
268.803		95.6642	96.2814	98.5597	96.978	96.2963	97.557		96.8894	0.426846		96.9302	93.0604	96.3636	95.7338	92.1017		94.838	0.952743		93.0723	84.7012	92.1546	92.9801	87.3633	96.4384		91.1183	1.75063		89.2929	84.2851	89.4081	92.3264	90.6285	80.1921		87.6888	1.8571		83.9114	77.7616	91.5577	87.9433	81.5696	80.6757		83.9032	2.06958
270.69		96.4945	96.6398	96.6049	98.3517	92.2559	99.6743		96.6702	1.02264		93.3953	92.5612	91.4286	97.9522	91.4324		93.3539	1.20776		93.2731	86.7083	90.5152	95.3642	86.5128	93.8356		91.0349	1.53879		88.4848	85.3156	87.3313	92.9354	88.7541	80.7923		87.2689	1.64883		86.5125	78.9971	91.5577	89.0071	82.4019	84.4595		85.4893	1.85282
272.583		95.2952	95.8333	98.5597	98.0769	95.6229	99.1857		97.0956	0.694706		94.5116	92.3615	93.6364	101.195	94.6453		95.2698	1.53612		94.8795	86.6191	93.6768	91.1258	87.3633	92.0548		90.9532	1.3632		88.5859	86.2173	89.3043	90.4994	87.1003	81.1525		87.1433	1.35109		85.0674	79.2151	89.0606	87.234	84.4233	82.1622		84.5271	1.43751
274.471		95.2952	98.2527	100.514	96.7033	94.7811	101.14		97.7811	1.08501		92.9302	92.4114	91.8182	101.024	92.2356		94.0839	1.74416		92.8715	85.6378	92.8571	92.5828	85.5407	96.1644		90.9424	1.77637		88.1818	83.5981	90.8619	92.57	88.5336	81.3926		87.523	1.74225		83.1407	76.6715	89.5363	88.5343	81.4506	81.4865		83.47	1.97304
276.368		93.7269	98.8799	99.5885	97.1154	97.6431	99.1857		97.6899	0.8812		94.6047	92.2117	93.7662	96.0751	89.2905		93.1896	1.15802		92.7711	85.281	93.4426	98.0132	84.2041	95.0685		91.4634	2.25421		86.4647	85.3585	90.4465	91.1084	88.3131	82.7131		87.4007	1.30227		84.2967	76.3081	87.7527	88.8889	79.5482	84.7297		83.5874	1.97118
278.258		96.2177	95.6989	97.0165	98.3517	93.266	100.814		96.8942	1.04174		95.0698	92.4114	94.026	98.8055	89.5582		93.9742	1.52459		92.8715	85.0134	90.5152	93.1126	89.1859	91.5069		90.3676	1.2273		87.6768	85.1009	85.3583	90.4994	89.7464	81.2725		86.609	1.39565		81.9846	78.0523	90.6064	87.234	83.591	80.4054		83.6456	1.87861
280.151		97.3247	94.5789	100.309	99.1758	96.9697	98.5342		97.8153	0.816796		92.8372	92.7109	93.8961	96.2457	92.1017		93.5583	0.731299		93.2731	87.2881	90.9836	96.6887	86.3912	91.6438		91.0448	1.55938		86.4647	83.5122	88.0581	92.2046	87.2106	81.0324		86.4138	1.57325		84.7784	76.8895	86.9203	85.9338	82.4019	81.0811		83.0008	1.51126
282.038		96.0332	96.4158	98.6625	94.9176	94.9495	97.8827		96.4769	0.624994		92.2791	91.4628	92.3377	96.4164	92.5033		92.9999	0.872918		90.7631	85.5486	92.2717	89.5364	87.2418	93.9726		89.889	1.27916		86.1616	85.015	88.8889	92.9354	87.3208	80.3121		86.7723	1.71231		84.3931	77.4709	89.2985	84.1608	82.283	84.8649		83.7452	1.57257
283.931		96.31	98.4319	98.1482	98.2143	96.8013	96.9055		97.4685	0.367446		92.5581	93.8093	90.9091	96.4164	93.842		93.507	0.90326		90.5623	85.504	89.9297	95.7616	87.6063	93.6986		90.5104	1.54464		87.1717	85.2297	85.8775	94.6407	89.6362	77.7911		86.7245	2.26643		82.0809	78.8517	88.585	89.0071	84.1855	82.7027		84.2355	1.60899
285.819		95.572	94.7581	99.5885	100	93.0976	100.163		97.1965	1.26183		93.4884	92.2616	93.6364	97.9522	90.6292		93.5935	1.21599		92.7711	85.4148	93.3255	94.0397	87.6063	91.0959		90.7089	1.41418		88.5859	82.4388	88.6812	91.352	89.4157	80.4322		86.8176	1.76879		84.2004	77.3256	94.4114	86.1702	82.9964	85.5405		85.1074	2.26361
287.713		96.9557	95.5197	96.2963	96.0165	94.9495	96.7427		96.0801	0.308157		96.093	92.012	94.9351	98.4642	92.5033		94.8015	1.18667		94.6787	84.4335	92.2717	93.7748	85.0547	91.3699		90.2639	1.80924		88.8889	84.5427	88.5774	92.57	85.5568	79.8319		86.6613	1.78788		81.4065	78.0523	90.2497	86.5248	83.4721	84.8649		84.0951	1.71762
289.604		98.2472	94.9821	100.206	97.6648	95.7913	96.0912		97.1637	0.784705		91.5349	92.4114	92.7273	102.048	91.7001		94.0843	2.00301		91.3655	85.4594	90.8665	92.1854	84.6902	91.3699		89.3228	1.35803		83.5353	83.4693	89.5119	94.3971	88.3131	79.8319		86.5098	2.13822		81.6956	77.0349	89.0606	82.3877	81.6885	82.2973		82.3608	1.57218
291.499		97.5092	95.7437	100.103	96.978	94.1077	99.3485		97.2984	0.909444		93.3023	90.8637	92.987	100	90.8969		93.61	1.67657		90.7631	86.8421	90.7494	93.5099	84.3256	93.0137		89.8673	1.46755		90.7071	84.8433	91.0696	89.4032	88.7541	80.072		87.4749	1.73639		83.526	75.7267	87.8716	83.8062	82.0452	85.5405		83.086	1.68207
293.387		95.8487	95.0717	103.189	96.4286	94.4444	97.3941		97.0628	1.29538		95.1628	90.5641	95.5844	102.389	92.5033		95.2408	2.00732		93.0723	85.7716	90.281	94.702	86.5128	94.6575		90.8329	1.62478		83.7374	84.1992	89.4081	94.1535	85.8875	82.2329		86.6031	1.81179		83.3333	78.125	92.5089	89.2435	82.6397	82.8378		84.7814	2.11655
295.281		92.5277	97.8943	98.0453	95.467	96.4647	97.0684		96.2446	0.838868		95.7209	89.4159	91.2987	97.099	91.9679		93.1005	1.43109		89.1566	84.1213	88.2904	93.1126	84.4471	94.9315		89.0099	1.79957		85.9596	81.7518	89.7196	91.4738	85.9978	79.3517		85.7091	1.87562		81.9846	76.7442	86.088	84.9882	81.6885	83.7838		82.5462	1.35097
297.171		95.941	98.3423	99.8971	99.7253	94.7811	98.6971		97.8973	0.850806		94.2326	92.0619	92.7273	97.099	91.4324		93.5106	1.01067		90.5623	86.1731	92.2717	91.6556	86.9988	92.4657		90.0212	1.12469		87.4748	82.6964	88.162	88.6723	88.3131	77.7911		85.5183	1.79116		81.9846	78.561	87.7527	83.5697	79.9049	81.7568		82.2549	1.30949
299.064		97.9705	97.9839	101.646	98.489	95.9596	100		98.6748	0.79509		92.7442	92.8108	92.4675	96.587	91.9679		93.3155	0.83124		93.4739	85.3256	93.0913	90.596	86.5128	93.6986		90.4497	1.51059		89.3939	83.4264	87.4351	88.4287	87.8721	80.6723		86.2048	1.38731		83.7187	76.9622	86.6825	82.9787	80.2616	82.4324		82.1727	1.34471
300.954		95.941	95.8781	98.8683	97.8022	94.4444	99.0228		96.9928	0.75579		91.6279	90.4643	94.6753	96.587	92.2356		93.118	1.10681		93.4739	84.6119	91.1007	91.5232	85.5407	95.3425		90.2655	1.75722		85.9596	85.6591	87.6428	91.352	86.3286	77.6711		85.7689	1.83138		81.9846	77.1076	87.8716	83.8062	82.0452	82.973		82.6313	1.41693
302.847		95.203	94.8029	97.8395	99.1758	96.9697	97.557		96.9246	0.677565		94.3256	91.0634	95.0649	97.7816	92.1017		94.0674	1.17781		92.1687	85.6378	92.623	93.9073	82.6245	92.7397		89.9502	1.89532		85.6566	83.684	90.2388	89.4032	85.667	80.072		85.7869	1.52764		83.6223	75.5087	91.3199	84.87	80.4994	80.2703		82.6818	2.17807
304.735		93.8192	93.862	97.7366	98.3517	93.4343	100		96.2006	1.15779		95.0698	90.7639	90.3896	95.7338	93.0388		92.9992	1.08567		91.2651	83.3185	92.74	91.9205	88.3354	93.8356		90.2358	1.5768		85.5556	85.1009	85.7736	92.9354	86.5491	77.6711		85.5976	1.98207		81.0212	76.4535	89.1796	84.0426	81.0939	81.0811		82.1453	1.72219
306.628		93.9114	96.0125	96.3992	94.9176	90.2357	100		95.2461	1.31034		92.6512	89.6655	92.0779	101.536	90.0937		93.2048	2.15856		94.3775	84.6566	92.74	91.6556	86.2697	95.4794		90.8632	1.80216		87.6768	83.9416	88.4735	94.3971	85.1158	76.7107		86.0526	2.38561		82.1773	76.8895	87.9905	83.8062	81.0939	82.8378		82.4659	1.4778
308.517		97.6015	96.9086	96.5021	91.6209	95.2862	98.5342		96.0756	0.995263		93.6744	91.313	96.4935	98.1229	91.9679		94.3143	1.30723		95.2811	83.3185	89.1101	93.5099	84.2041	90.9589		89.3971	1.98306		86.3636	83.3834	89.3043	91.1084	87.6516	79.4718		86.2139	1.72302		83.3333	75.1453	88.2283	84.3972	82.4019	81.4865		82.4988	1.75342
310.409		97.786	94.9821	101.337	95.467	91.9192	100.814		97.051	1.48549		91.814	90.4643	93.8961	97.9522	92.2356		93.2724	1.29184		88.4538	85.3702	91.1007	92.1854	83.2321	94.2466		89.0981	1.72019		86.4647	84.6715	87.9543	90.9866	85.4465	75.9904		85.2523	2.06406		83.3333	75.1453	85.7313	84.1608	80.7372	80.9459		81.6756	1.52129
312.297		97.9705	95.1165	100	95.8791	98.3165	96.5798		97.3104	0.732063		93.8605	91.9621	92.8571	97.2696	92.7711		93.7441	0.93145		90.4618	84.835	87.4707	92.8477	81.4095	94.1096		88.5224	1.99151		83.5353	82.2241	88.8889	90.2558	86.1081	79.1116		85.0206	1.71751		81.0212	77.907	84.6611	85.461	80.6183	82.2973		81.9943	1.13678
314.19		95.1107	95.2061	98.8683	95.8791	95.2862	99.8371		96.6979	0.855832		92.9302	90.015	91.948	98.2935	93.0388		93.2451	1.37376		93.7751	83.8537	91.2178	92.1854	82.6245	91.9178		89.2624	1.94164		88.2828	81.7948	86.812	91.1084	86.3286	79.1116		85.573	1.78992		83.526	74.7093	92.6278	85.1064	80.3805	80.9459		82.8827	2.42997
316.078		96.679	95.7437	102.263	95.1923	94.6128	97.7199		97.0352	1.13816		90.7907	90.2646	94.8052	97.099	91.1647		92.8248	1.33489		89.8594	85.5486	91.6862	89.5364	86.1482	90.411		88.865	1.00279		88.9899	83.5981	84.9429	92.8136	85.1158	76.7107		85.3618	2.2127		80.7322	75	92.2711	82.5059	81.6885	80.9459		82.1906	2.29019
317.971		93.8192	98.0735	102.675	94.3681	94.9495	98.0456		96.9885	1.36257		94.1395	90.9635	89.6104	99.4881	90.7631		92.9929	1.78932		87.9518	83.0954	91.5691	92.8477	85.0547	94.5206		89.1732	1.85499		84.5455	84.1992	84.7352	88.4287	86.7696	78.7515		84.5716	1.33851		81.3102	75.0727	88.4661	82.1513	80.7372	81.2162		81.4923	1.74126
319.859		96.31	96.7742	96.1934	98.0769	96.4647	97.557		96.896	0.309271		93.7674	90.2147	92.0779	95.9044	92.6372		92.9203	0.941617		90.3615	84.3443	89.1101	91.9205	85.7837	92.8767		89.0661	1.38344		84.3434	82.4388	86.7082	92.6918	87.8721	81.8727		85.9879	1.64567		79.0944	76.0174	87.396	82.9787	76.5755	83.7838		80.9743	1.83123
321.755		96.4945	94.8029	98.1482	94.5055	98.4848	96.9055		96.5569	0.67477		90.7907	90.8637	86.7532	96.0751	90.0937		90.9153	1.49398		91.6667	86.9759	91.2178	92.053	82.9891	94.7945		89.9495	1.72961		86.5657	84.4998	89.4081	90.2558	85.0055	79.7119		85.9078	1.55752		80.4432	73.6192	90.3686	80.4964	77.0511	80.8108		80.4649	2.28562
323.645		91.4207	94.7133	99.5885	98.7637	91.4141	98.8599		95.7934	1.55021		93.0233	92.9606	89.3507	95.3925	89.0228		91.9499	1.21139		90.0602	82.917	91.1007	92.4503	84.8117	92.0548		88.8991	1.64577		87.0707	82.7823	83.4891	90.134	89.8567	79.7119		85.5074	1.71127		82.948	74.1279	88.585	82.8605	77.7646	80.5405		81.1378	2.02138
325.537		94.7417	93.7276	98.6625	94.7802	93.9394	99.6743		95.921	1.04933		91.1628	90.8138	92.0779	97.2696	88.6212		91.9891	1.43699		92.9719	83.9875	89.6955	93.9073	85.6622	94.1096		90.0557	1.78912		82.5252	84.8003	84.6314	88.1851	84.4542	80.6723		84.2114	1.02861		82.7553	75.3634	89.893	82.2695	78.8347	80.2703		81.5644	1.99047
327.424		96.4022	95.2061	102.263	95.3297	95.1179	95.9283		96.7079	1.12913		92.186	89.4159	92.0779	97.6109	90.2276		92.3037	1.42971		92.2691	85.058	90.6323	92.4503	85.9052	93.1507		89.9109	1.44479		83.1313	83.0829	86.0851	91.8392	86.6593	77.551		84.7248	1.93998		79.1907	74.782	85.7313	84.279	81.3317	82.973		81.3813	1.61456
329.316		97.786	94.2652	102.366	95.467	96.2963	94.4625		96.7739	1.23654		93.3023	92.3615	93.6364	103.584	88.755		94.3278	2.47105		91.4659	82.8724	93.5597	89.6689	84.0826	93.4247		89.179	1.90116		85.0505	82.6535	86.3967	88.5506	86.7696	80.1921		84.9355	1.24215		80.9249	76.0174	83.7099	84.0426	81.6885	82.5676		81.4918	1.196
331.206		95.1107	94.7133	102.16	96.1539	95.9596	95.6026		96.6168	1.12989		91.6279	88.7169	91.8182	99.8294	94.2436		93.2472	1.86421		88.8554	86.5745	89.9297	93.3775	88.3354	94.6575		90.2883	1.27045		87.4748	83.5981	86.9159	90.9866	85.5568	79.5918		85.6873	1.57399		81.2139	75.436	88.2283	82.1513	80.1427	81.6216		81.4656	1.67728
333.1		94.834	97.6255	96.9136	96.5659	93.0976	97.2313		96.0446	0.709094		88.3721	91.9621	93.6364	95.0512	92.6372		92.3318	1.11817		90.4618	83.4523	91.5691	91.5232	85.6622	95.7534		89.737	1.82		86.7677	83.7699	89.7196	90.2558	85.1158	80.1921		85.9701	1.54939		79.9615	74.3459	89.4174	80.3782	81.0939	81.6216		81.1364	1.97381
334.988		94.834	96.5054	97.8395	96.5659	95.4545	99.3485		96.758	0.667886		90.7907	90.015	90	96.7577	91.5663		91.8259	1.26639		90.4618	82.8278	89.6955	92.5828	86.6343	90.548		88.7917	1.42928		84.4444	83.4693	86.7082	89.7686	86.1081	79.2317		84.955	1.44681		79.2871	75.8721	84.4233	85.8156	79.786	82.027		81.2018	1.48798
336.882		94.7417	95.2509	98.251	94.2308	94.2761	96.5798		95.555	0.644513		93.3953	90.4643	91.8182	95.9044	91.4324		92.6029	0.950989		91.7671	85.1026	93.4426	92.8477	85.2977	92.7397		90.1996	1.59632		86.4647	82.1383	87.3313	88.916	88.8644	79.952		85.6111	1.51965		81.5992	74.9273	92.1522	85.461	81.3317	82.4324		82.984	2.30978
338.769		96.5867	97.3566	97.1193	99.0385	96.2963	96.7427		97.19	0.400513		91.814	90.7139	89.6104	98.6348	89.5582		92.0663	1.69351		91.0643	85.9054	91.9204	92.053	85.0547	92.3288		89.7211	1.35663		86.5657	82.6964	90.4465	90.0122	84.0132	78.0312		85.2942	1.92841		80.8285	75.1453	89.4174	82.8605	77.0511	83.1081		81.4018	2.06308
340.664		96.1255	96.7294	97.5309	94.9176	94.9495	98.3713		96.4374	0.566924		89.9535	88.7669	93.1169	95.9044	92.2356		91.9955	1.24878		88.4538	81.8466	88.6417	92.5828	84.8117	94.2466		88.4305	1.89348		87.4748	82.0095	86.189	90.2558	86.4388	79.5918		85.3266	1.57885		78.5164	74.4913	87.7527	82.9787	79.5482	80.8108		80.683	1.82196
342.553		95.6642	92.5179	96.5021	97.9396	94.1077	99.5114		96.0405	1.03525		90.6977	90.9136	91.5584	97.9522	90.3615		92.2967	1.42732		91.4659	84.7012	91.5691	88.6093	86.6343	91.0959		89.0126	1.17334		84.9495	83.8557	88.0581	90.4994	85.7773	79.4718		85.4353	1.5377		81.6956	74.9273	91.5577	83.3333	82.4019	81.7568		82.6121	2.1696
344.449		96.1255	96.4606	96.6049	98.0769	93.771	97.2313		96.3784	0.592529		91.3488	89.4658	91.1688	96.9283	90.4953		91.8814	1.30421		89.0562	84.1213	88.993	89.9338	86.1482	91.9178		88.3617	1.1384		87.3737	80.936	87.7466	89.2814	87.2106	79.7119		85.3767	1.63324		82.0809	73.7645	87.7527	78.9598	77.4078	81.2162		80.197	1.93531
346.34		93.4502	96.1918	95.7819	98.6264	95.2862	100		96.5561	0.968469		94.5116	92.4114	92.2078	98.9761	90.4953		93.7204	1.46033		90.3615	83.5415	90.9836	91.7881	85.2977	94.3836		89.3926	1.68446		85.1515	84.5857	86.7082	87.4543	84.8953	78.0312		84.471	1.36666		78.7091	76.1628	86.9203	82.2695	78.9536	81.2162		80.7053	1.51682
348.235		96.0332	94.2652	99.5885	98.0769	98.4848	98.6971		97.5243	0.810538		94.6977	88.1677	89.4805	94.8805	91.1647		91.6782	1.35626		90.7631	83.5861	87.3536	92.9801	82.503	93.5616		88.4579	1.93414		83.9394	82.3959	87.9543	86.7235	83.0209	79.2317		83.8776	1.2811		79.1907	76.5988	86.8014	82.3877	78.9536	80.4054		80.723	1.44114
350.121		94.3727	93.0556	94.9588	97.3901	95.1179	98.6971		95.5987	0.844992		90.4186	91.2631	91.8182	96.7577	90.7631		92.2041	1.16263		90.6626	82.4264	89.2272	91.5232	84.3256	91.9178		88.3471	1.63504		86.0606	80.4208	85.6698	88.4287	83.903	78.1513		83.7724	1.56381		78.0347	72.9651	88.3472	84.3972	78.8347	83.6487		81.0379	2.24031
352.015		97.1402	93.3244	97.6337	96.1539	95.2862	99.3485		96.4812	0.846266		91.6279	91.6126	90	98.1229	87.4163		91.7559	1.76763		92.1687	84.2551	88.5246	89.1391	83.4751	92.8767		88.4065	1.59416		86.0606	83.7699	84.4237	87.8197	84.8953	78.8715		84.3068	1.23297		78.9981	73.3285	90.0119	79.4326	81.3317	83.9189		81.1703	2.27293
353.902		95.203	94.2204	100	97.8022	90.9091	100		96.3558	1.46296		87.5349	87.2691	91.039	95.0512	86.8809		89.555	1.56313		92.3695	84.7904	87.822	90.4636	85.1762	92.1918		88.8022	1.38056		87.2727	83.8987	84.216	88.916	84.2337	79.8319		84.7282	1.28037		79.5761	75.9448	88.2283	78.1324	80.1427	82.2973		80.7203	1.73208
355.798		92.7122	94.9373	100	97.2528	95.1179	96.0912		96.0185	1.00487		87.6279	87.6685	89.8701	98.9761	90.0937		90.8473	2.09845		91.4659	83.1847	89.1101	88.0795	85.0547	91.0959		87.9984	1.35028		84.2424	82.5247	90.135	88.0633	88.2029	78.6315		85.3	1.75813		80.1541	72.4564	86.6825	80.1418	78.7158	78.9189		79.5116	1.85286
357.686		94.0037	95.2957	99.5885	97.5275	95.9596	93.6482		96.0039	0.916953		94.0465	88.5671	91.039	98.1229	87.6841		91.8919	1.9099		90.8635	81.3113	91.8033	92.5828	84.0826	92.8767		88.92	2.02035		84.6465	83.5981	86.812	88.3069	86.4388	78.9916		84.799	1.3446		79.3834	74.8547	90.2497	79.7872	77.4078	81.0811		80.4607	2.14919
359.58		95.203	94.8477	101.132	94.0934	94.1077	99.3485		96.4553	1.23129		93.6744	91.1633	90.7792	95.3925	92.9049		92.7829	0.844323		91.5663	82.471	88.7588	91.6556	87.2418	93.5616		89.2092	1.6326		86.7677	82.3529	85.5659	92.2046	84.1235	76.1104		84.5209	2.16621		81.5029	73.5465	90.3686	82.1513	79.5482	83.6487		81.7944	2.23786
361.47		96.4945	95.3405	100.514	96.2912	95.2862	98.0456		96.9954	0.814313		91.2558	86.9695	93.6364	97.4403	91.7001		92.2004	1.70327		90.6626	82.025	91.8033	89.8013	86.2697	94.5206		89.1804	1.80417		85.8586	83.3405	87.3313	90.134	84.0132	79.7119		85.0649	1.46283		78.0347	72.4564	87.8716	83.4515	79.0725	82.5676		80.5757	2.16107
363.366		95.2952	93.9516	100	94.2308	95.9596	97.8827		96.22	0.950067		90.1395	89.8153	89.3507	94.8805	91.834		91.204	1.01021		89.1566	82.7386	90.7494	91.2583	86.1482	94.5206		89.0953	1.69257		84.7475	80.0344	85.8775	88.6723	86.4388	77.7911		83.9269	1.69417		78.42	73.6192	89.6552	81.7967	78.8347	84.1892		81.0858	2.24718
365.256		96.31	94.2204	100.514	96.978	93.266	98.3713		96.61	1.08727		90.3256	90.7139	88.7013	96.7577	90.8969		91.4791	1.3754		90.4618	85.1918	91.3349	88.7417	87.1203	90.8219		88.9454	0.983069		86.8687	79.4332	88.8889	88.6723	85.0055	80.5522		84.9035	1.6615		81.2139	72.1657	87.2771	83.2151	78.1213	79.8649		80.3096	2.07457
367.148		92.3432	94.5789	98.5597	92.3077	93.6027	102.117		95.5849	1.60947		89.4884	86.7699	94.8052	101.877	89.9598		92.5801	2.66053		92.4699	84.1659	90.281	89.6689	85.1762	92.0548		88.9694	1.43114		83.4343	80.8931	85.8775	86.3581	86.6593	81.7527		84.1625	1.0169		76.4933	73.0378	88.8228	80.6147	77.4078	81.0811		79.5762	2.20454
369.036		96.7712	96.4606	100.617	96.1539	94.4444	100.814		97.5436	1.05595		89.1163	89.6156	93.2468	97.4403	90.4953		91.9828	1.53972		90.261	83.0954	88.6417	90.7285	85.1762	94.3836		88.7144	1.66017		82.8283	81.3225	87.0197	89.525	83.7927	79.4718		83.9933	1.51364		79.9615	75.6541	88.2283	84.9882	78.3591	78.3784		80.9282	1.92897
370.932		91.8819	94.6237	100.617	96.978	100.168	96.9055		96.8625	1.3523		89.0233	89.0165	93.2468	96.587	89.6921		91.5131	1.49162		88.755	84.6566	87.0023	90.4636	86.3912	91.0959		88.0608	1.01593		86.9697	81.4083	83.8006	88.6723	85.0055	76.8307		83.7812	1.72751		79.7688	71.875	84.4233	81.9149	79.3103	84.4595		80.292	1.90746
372.819		94.834	94.8477	102.572	95.467	94.9495	99.8371		97.0845	1.35318		92	89.4159	91.2987	96.587	89.1566		91.6916	1.33828		90.7631	82.8724	88.7588	90.4636	83.3536	90.6849		87.8161	1.5184		82.3232	79.0897	88.4735	89.525	84.785	78.2713		83.7446	1.91922		78.5164	74.2006	87.396	79.4326	78.5969	80.4054		79.758	1.75725
374.714		95.8487	93.8172	99.2798	100	94.7811	99.1857		97.1521	1.08344		89.8605	88.9166	88.8312	95.3925	89.2905		90.4583	1.24683		88.0522	83.1847	90.6323	92.9801	81.531	94.1096		88.415	2.10605		83.8384	81.5801	85.6698	89.8904	83.1312	75.9904		83.35	1.87742		77.553	73.9826	90.2497	81.9149	77.2889	80.5405		80.2549	2.29618
376.603		94.6495	95.8333	99.5885	95.6044	97.8114	98.5342		97.0036	0.786263		87.814	90.9136	91.1688	94.198	91.7001		91.1589	1.01926		91.1647	81.9804	86.4169	93.1126	81.774	92.7397		87.8647	2.12927		87.2727	81.2795	86.189	86.2363	82.6902	79.1116		83.7966	1.33251		80.1541	73.0378	86.2069	82.7423	75.1486	81.3513		79.7735	1.99663
378.498		93.1734	93.2796	95.679	95.6044	92.5926	99.6743		95.0005	1.07652		90.5116	86.67	90.3896	99.6587	89.9598		91.438	2.1732		89.6586	80.8207	88.7588	93.245	86.6343	91.9178		88.5059	1.80793		83.1313	79.7767	84.9429	89.7686	82.9107	77.6711		83.0335	1.71653		78.3237	71.0756	87.0392	81.2057	79.1914	81.8919		79.7879	2.14027
380.385		91.7897	94.2652	98.251	97.6648	97.3064	100		96.5462	1.21781		89.6744	89.0664	90.2597	98.6348	91.2985		91.7868	1.75112		88.755	84.5228	94.1452	90.596	84.2041	90.274		88.7495	1.5639		83.5353	81.4942	87.1236	89.2814	83.462	78.9916		83.9813	1.52223		81.5992	73.0378	86.8014	78.9598	78.3591	83.3784		80.356	1.92974
382.279		94.5572	95.3853	96.8107	96.7033	98.6532	98.6971		96.8011	0.684938		88.9302	87.6685	89.7403	95.9044	92.2356		90.8958	1.45767		89.1566	81.9358	89.8127	91.1258	88.2138	90.137		88.397	1.35199		85.1515	81.0648	84.9429	91.5956	85.5568	79.8319		84.6906	1.68779		79.3834	71.1483	89.6552	80.4964	76.6944	80.9459		79.7206	2.47356
384.168		96.4022	96.2814	101.235	96.7033	94.4444	99.0228		97.3481	0.979611		92.7442	90.015	90.9091	98.6348	89.0228		92.2652	1.70613		89.1566	83.6307	91.8033	89.9338	82.746	90.548		87.9697	1.55696		85.7576	81.4083	83.6968	90.2558	84.0132	78.9916		84.0206	1.57178		74.9518	72.093	87.1582	79.7872	78.9536	78.7838		78.6213	2.08533
386.064		96.31	93.8172	99.0741	95.8791	93.4343	94.4625		95.4962	0.851445		89.2093	90.5142	88.4416	96.4164	90.6292		91.0421	1.40453		89.8594	86.0392	89.8127	91.2583	83.9611	89.726		88.4428	1.14484		85.4545	81.3654	82.9699	89.0378	81.6979	79.1116		83.2729	1.43202		75.8189	74.9273	87.396	84.279	77.7646	78.3784		79.7607	2.02901
387.952		93.8192	93.1452	99.4856	96.7033	93.4343	96.5798		95.5279	1.01869		89.4884	88.5671	90	97.2696	90.0937		91.0838	1.57		91.5663	83.4969	89.8127	88.8742	83.4751	92.8767		88.3503	1.63877		84.7475	80.3349	86.189	88.0633	83.462	79.3517		83.6914	1.37378		77.3603	73.1831	89.5363	81.9149	77.2889	79.0541		79.7229	2.2791
389.846		94.3727	94.8477	100.412	94.0934	93.0976	98.6971		95.92	1.19348		93.0233	88.8168	91.948	99.6587	90.8969		92.8687	1.83414		88.253	81.8912	90.3981	90.4636	86.3912	91.2329		88.105	1.43962		84.7475	80.4637	83.3852	90.0122	83.2415	78.6315		83.4136	1.60127		80.0578	74.0552	88.7039	83.2151	77.17	81.3513		80.7589	2.06412
391.736		93.8192	91.4875	99.8971	96.1539	95.7913	98.0456		95.8657	1.21724		89.4884	87.7184	92.4675	97.4403	92.3695		91.8968	1.65134		88.755	82.5156	90.281	88.7417	86.9988	93.6986		88.4985	1.50983		84.7475	82.2671	87.1236	86.7235	83.462	77.431		83.6258	1.45301		79.5761	73.7645	88.8228	80.7329	77.2889	79.3243		79.9183	2.04293
393.631		94.0037	92.6971	98.5597	97.5275	93.9394	94.9511		95.2797	0.931181		89.7674	88.6171	91.6883	98.9761	91.2985		92.0695	1.8119		90.6626	81.9358	91.9204	90.8609	86.6343	92.6027		89.1028	1.66506		85.0505	81.2366	86.5005	91.1084	82.1389	81.2725		84.5512	1.57693		79.5761	71.1483	85.8502	81.3239	79.786	81.8919		79.9294	1.98415
395.52		92.8044	95.0269	100.72	96.2912	91.7508	100.163		96.1261	1.51452		91.907	88.8168	89.2208	97.4403	88.4873		91.1744	1.67919		88.0522	83.8091	87.3536	90.1987	83.7181	91.0959		87.3713	1.26972		84.7475	80.4637	88.162	89.8904	83.2415	80.5522		84.5095	1.59151		76.975	72.4564	87.7527	81.5603	78.0024	81.4865		79.7055	2.11562
397.417		91.0517	91.8459	103.086	97.3901	94.2761	98.6971		96.0579	1.86296		90.2326	90.9635	91.8182	94.7099	89.0228		91.3494	0.957136		92.0683	84.0767	89.5785	86.2252	83.9611	90		87.6516	1.38044		80.101	81.9665	85.2544	88.5506	84.2337	77.431		82.9229	1.61104		79.8651	72.6744	90.6064	79.5508	77.7646	80.1351		80.0994	2.38981
399.307		94.7417	93.7724	98.6625	100	93.266	98.8599		96.5504	1.20376		89.4884	89.1663	93.2468	98.6348	91.834		92.474	1.7149		87.5502	81.6681	89.9297	89.9338	85.9052	91.6438		87.7718	1.47322		85.6566	80.8501	84.7352	86.9671	82.6902	78.7515		83.2751	1.26649		76.3006	73.6192	86.8014	81.5603	77.5268	83.3784		79.8644	2.00428
401.202		93.0812	94.6685	100.206	95.055	94.2761	99.3485		96.1058	1.1971		88.4651	88.4673	88.4416	94.3686	90.2276		89.994	1.14608		89.759	82.1142	88.0562	88.4768	82.017	90.8219		86.8742	1.57186		81.0101	80.6355	88.785	90.6212	82.2492	77.431		83.4553	2.09312		75.5299	73.1831	86.4447	80.1418	78.8347	80		79.0224	1.85858
403.104		93.2657	93.8172	98.3539	93.8187	94.2761	98.8599		95.3986	1.02504		90.3256	89.1163	90.5195	96.9283	91.9679		91.7715	1.36638		89.1566	82.3372	89.4614	92.5828	87.1203	90.137		88.4659	1.42104		82.8283	80.3778	85.3583	86.7235	85.226	78.9916		83.2509	1.25134		79.9615	73.9826	85.6124	80.6147	77.5268	81.6216		79.8866	1.59955
405		96.5867	93.19	100.926	94.0934	93.9394	95.9283		95.7773	1.15605		92.2791	86.021	92.3377	99.4881	88.755		91.7762	2.26154		90.4618	83.2739	89.1101	91.3907	84.5687	91.6438		88.4082	1.47398		82.6263	82.6106	87.7466	88.0633	82.5799	78.6315		83.7097	1.46854		78.0347	71.5116	88.7039	78.2506	77.4078	83.6487		79.5929	2.40673
406.892		94.2804	92.6971	96.3992	92.7198	95.6229	97.557		94.8794	0.812754		90.3256	87.6186	90.7792	97.2696	90.2276		91.2441	1.60537		89.0562	82.8724	89.3443	92.9801	83.1106	90.548		87.9853	1.67743		83.2323	79.8626	85.2544	89.0378	84.6748	79.1116		83.5289	1.502		76.5896	71.8023	88.9417	81.6785	76.0999	80.5405		79.2754	2.40803
408.787		93.9114	92.4283	103.086	96.8407	93.0976	99.6743		96.5065	1.71685		91.4419	88.8667	92.2078	98.1229	91.0308		92.334	1.54989		89.9598	83.6307	91.8033	91.6556	82.017	89.726		88.1321	1.72657		83.5353	82.8252	86.7082	87.5761	83.462	76.2305		83.3896	1.6344		77.842	72.6744	86.5636	82.6241	74.7919	81.4865		79.3304	2.12079
410.676		93.1734	92.7867	94.1358	95.7418	97.4748	94.6254		94.6563	0.709176		93.5814	88.3175	92.7273	97.7816	89.826		92.4467	1.63929		90.6626	82.0696	87.1194	91.2583	85.0547	94.9315		88.516	1.90416		83.0303	80.6355	85.5659	87.0889	81.1466	78.3914		82.6431	1.32672		79.4798	71.7297	87.7527	80.6147	78.0024	81.4865		79.8443	2.12294
412.573		94.9262	94.4892	95.8848	95.467	92.7609	98.3713		95.3166	0.753773		88.5581	88.4174	91.2987	97.2696	91.7001		91.4488	1.60489		88.6546	82.5602	91.9204	89.5364	84.5687	89.3151		87.7592	1.42484		83.3333	82.4388	83.2814	87.4543	82.6902	76.3505		82.5914	1.45666		77.4566	72.311	86.5636	83.8062	74.7919	79.0541		78.9972	2.19956
414.46		93.8192	94.086	99.3827	92.8571	95.9596	95.4397		95.2574	0.944218		90.8837	88.2676	87.013	98.4642	89.9598		90.9177	2.00172		88.1526	81.802	93.2084	89.2715	85.6622	91.5069		88.2673	1.67847		83.6364	81.7089	84.5275	85.7491	82.3594	78.9916		82.8288	0.970644		75.7225	70.9302	86.4447	80.4964	77.5268	79.0541		78.3625	2.10761
416.356		92.1587	90.681	96.2963	95.6044	94.7811	94.6254		94.0245	0.880361		89.7674	86.3704	92.0779	96.4164	88.4873		90.6239	1.71839		87.1486	80.5977	89.9297	88.2119	86.8773	93.2877		87.6755	1.71149		83.6364	80.3778	84.0083	86.1145	81.5876	79.8319		82.5928	0.983764		77.553	72.3837	85.6124	82.7423	78.2402	81.2162		79.6246	1.88631
418.244		94.2804	94.31	97.428	95.3297	96.4647	94.1368		95.3249	0.55541		85.2093	86.7199	90.7792	95.3925	90.6292		89.746	1.78142		88.253	81.6681	89.8127	89.2715	83.5966	91.0959		87.283	1.53784		84.0404	82.5676	85.4621	88.0633	84.8953	79.952		84.1635	1.12145		77.9383	73.3285	86.5636	79.3144	76.5755	80.5405		79.0435	1.81512
420.14		93.3579	93.1452	101.646	96.2912	92.7609	96.4169		95.603	1.37615		89.0233	87.7683	90.5195	97.9522	90.4953		91.1517	1.7756		88.253	78.6797	89.5785	85.9603	82.746	89.452		85.7783	1.7671		84.7475	80.6784	83.4891	87.3325	83.0209	77.1909		82.7432	1.42366		79.7688	72.8924	85.9691	79.669	76.6944	79.8649		79.1431	1.75926
422.029		94.5572	93.0108	96.7078	95.467	94.9495	94.9511		94.9406	0.492331		89.1163	88.018	90.6493	99.8294	89.4244		91.4075	2.14679		91.3655	81.9804	91.6862	90.8609	82.8676	88.9041		87.9441	1.79328		85.4545	80.249	85.7736	87.9415	82.9107	78.9916		83.5535	1.41352		74.7592	71.3663	86.9203	81.7967	75.0297	78.5135		78.0643	2.29171
423.923		96.4945	92.3835	103.807	95.467	92.0875	97.7199		96.3265	1.75287		90.4186	88.1677	90.3896	96.587	91.0308		91.3188	1.40428		88.0522	80.1517	88.1733	89.2715	87.3633	90.137		87.1915	1.46397		85.0505	82.1812	82.6584	92.3264	82.3594	78.8715		83.9079	1.86621		77.7457	69.7674	85.9691	79.4326	73.6029	83.7838		78.3836	2.48531
425.811		96.4022	91.9355	102.263	93.956	93.266	96.4169		95.7067	1.49691		91.7209	88.7669	90.9091	96.4164	89.0228		91.3672	1.37999		88.6546	82.2034	87.822	88.6093	84.2041	90.548		87.0069	1.28342		81.9192	80.936	82.1392	88.0633	84.344	77.6711		82.5121	1.42106		77.0713	70.2035	84.8989	78.3688	77.17	78.3784		77.6818	1.9114
427.706		94.9262	91.8907	99.7942	96.4286	94.2761	95.9283		95.5407	1.06975		89.3023	88.2177	90.6493	97.099	90.4953		91.1527	1.55052		87.6506	81.3113	90.3981	89.6689	82.8676	91.7808		87.2796	1.74087		84.0404	80.7643	84.3198	91.4738	80.4851	76.3505		82.9057	2.08259		76.5896	73.2558	82.6397	81.5603	76.3377	78.6487		78.172	1.43417
429.593		94.834	92.6523	97.0165	95.3297	95.9596	97.8827		95.6125	0.745974		90.5116	87.0195	90.9091	93.8567	89.4244		90.3442	1.1087		88.9558	79.9286	86.651	93.6424	83.1106	90.6849		87.1622	2.05443		83.6364	77.9304	85.2544	86.6017	82.0287	77.1909		82.1071	1.57126		77.7457	71.5116	83.4721	77.5414	77.17	79.1892		77.7717	1.5717
431.488		91.7897	92.6971	98.1482	96.7033	96.4647	98.8599		95.7771	1.18099		88.7442	88.4174	88.1818	97.099	90.8969		90.6679	1.67865		88.5542	80.1963	88.8759	88.0795	83.2321	90		86.4896	1.58141		82.8283	80.5067	84.5275	86.9671	84.6748	78.6315		83.0226	1.24101		74.2775	71.5843	86.4447	79.9054	76.8133	78.7838		77.9682	2.09745
433.378		93.6347	93.7724	95.8848	94.0934	93.9394	95.7655		94.515	0.419341		89.2093	86.2207	88.7013	98.8055	89.0228		90.3919	2.17162		90.7631	81.5343	86.2998	91.6556	82.26	93.6986		87.7019	2.08632		84.0404	78.4457	83.1776	90.4994	78.6108	78.0312		82.1342	1.9795		75.6262	72.9651	85.9691	79.9054	77.7646	80.9459		78.8627	1.84743
435.271		93.7269	94.086	98.6625	93.8187	96.2963	99.6743		96.0441	1.06855		88.186	89.6655	91.4286	95.3925	89.9598		90.9265	1.22947		86.6466	81.5343	88.4075	89.8013	86.5128	90.411		87.2189	1.30909		82.8283	80.249	86.6044	87.8197	83.6825	75.8704		82.8424	1.77921		72.3507	70.7849	83.8288	79.3144	76.4566	77.7027		76.7397	1.93748
437.156		94.834	91.3082	94.2387	95.8791	97.4748	98.3713		95.351	1.02892		90.7907	87.1193	92.3377	96.4164	89.0228		91.1374	1.58185		90.7631	82.248	90.5152	89.9338	84.8117	92.0548		88.3877	1.59677		82.6263	78.9609	84.6314	84.0439	82.9107	76.9508		81.6873	1.24455		77.3603	70.4215	89.2985	78.6052	75.981	79.5946		78.5435	2.52131
439.052		94.3727	92.3387	93.2099	96.978	92.5926	95.6026		94.1824	0.74702		86.6977	85.971	92.4675	98.2935	89.9598		90.6779	2.23285		88.5542	83.0062	89.4614	90.1987	82.1385	89.0411		87.0667	1.44256		82.9293	80.4208	85.5659	88.0633	84.785	76.7107		83.0792	1.64907		74.3738	73.1105	86.088	78.9598	77.17	80.5405		78.3738	1.91223
440.942		94.7417	93.8172	94.6502	98.2143	95.7913	96.0912		95.551	0.630215		89.1163	86.3704	88.7013	94.8805	91.834		90.1805	1.46051		89.0562	78.5459	89.2272	88.6093	86.8773	92.1918		87.4179	1.90762		83.7374	78.0593	85.7736	85.8709	83.1312	79.4718		82.674	1.32561		73.6031	71.5843	85.2557	80.0236	75.7432	79.5946		77.6341	2.0336
442.836		96.4022	94.7133	97.3251	95.6044	94.4444	94.6254		95.5191	0.470877		88.186	87.9181	88.3117	94.7099	87.5502		89.3352	1.35		87.4498	80.9545	87.2365	89.8013	83.5966	90.6849		86.6206	1.51605		82.6263	80.1632	83.8006	88.4287	83.2415	75.7503		82.3351	1.71526		78.3237	71.5116	84.6611	80.4964	78.9536	78.3784		78.7208	1.73917
444.724		92.8044	91.8907	99.5885	91.6209	97.6431	96.0912		94.9398	1.35543		89.4884	87.9181	90.5195	94.8805	88.6212		90.2855	1.2284		88.6546	80.1071	87.2365	88.8742	83.3536	91.9178		86.6906	1.73902		81.6162	78.1451	85.9813	90.8648	81.9184	77.9112		82.7395	2.02392		77.553	71.439	85.4935	81.6785	77.7646	79.7297		78.943	1.92043
446.621		93.8192	94.9821	97.0165	94.3681	92.2559	95.9283		94.7283	0.678459		87.6279	87.6186	90.2597	94.0273	88.8889		89.6845	1.18999		88.755	81.3113	89.1101	87.6821	82.26	93.1507		87.0449	1.83162		82.0202	79.6908	84.1121	87.2107	82.6902	77.6711		82.2325	1.36427		74.1811	70.0581	82.7586	79.7872	76.4566	81.2162		77.4097	1.95048
448.51		95.203	91.2634	95.679	93.2692	94.2761	94.1368		93.9713	0.642364		87.5349	85.8712	92.987	101.024	90.0937		91.5021	2.66739		89.9598	79.438	88.4075	88.0795	84.0826	88.6301		86.4329	1.61586		82.3232	77.3293	84.4237	87.0889	81.5876	77.7911		81.7573	1.5408		76.3969	72.311	85.4935	77.7778	76.3377	77.8378		77.6925	1.76406
450.414		94.7417	94.086	103.086	95.055	96.9697	97.2313		96.8617	1.34608		87.4419	90.6141	91.4286	94.7099	91.1647		91.0718	1.15667		87.4498	81.0437	87.822	90.7285	83.5966	89.589		86.7049	1.50578		83.3333	79.3044	86.9159	87.2107	82.6902	78.1513		82.9343	1.53203		77.264	70.8576	84.78	77.0686	77.17	80.2703		77.9017	1.86349
452.309		93.6347	91.3979	97.3251	95.467	96.1279	95.9283		94.9802	0.867861		87.0698	89.0165	90.3896	95.3925	91.2985		90.6334	1.38681		88.253	80.3301	90.281	88.7417	82.1385	93.2877		87.172	2.0236		83.7374	81.623	83.5929	86.3581	81.2569	78.5114		82.5133	1.0929		72.5434	71.5116	88.7039	77.0686	76.0999	80.2703		77.6996	2.55303
454.204		93.2657	92.1147	96.0905	95.7418	95.1179	96.2541		94.7641	0.691013		86.5116	87.5187	93.6364	98.6348	91.7001		91.6003	2.1931		89.5582	78.5459	87.4707	86.755	84.0826	91.3699		86.2971	1.85238		84.7475	77.8446	85.2544	87.0889	80.0441	78.6315		82.2685	1.59211		75.6262	68.75	85.8502	77.7778	75.1486	78.9189		77.012	2.28027
456.092		91.2362	92.1147	94.6502	94.2308	93.771	98.0456		94.0081	0.967611		86.0465	88.5671	88.5714	96.0751	88.6212		89.5763	1.69756		89.6586	81.3559	89.1101	88.6093	83.9611	90.137		87.1387	1.47112		82.9293	78.918	81.7238	87.8197	81.2569	78.0312		81.7798	1.41799		78.2274	69.9128	85.4935	78.487	77.5268	80.4054		78.3421	2.05873
457.99		92.6199	94.7133	94.2387	93.544	95.1179	96.5798		94.4689	0.555696		89.6744	86.6201	89.0909	95.7338	86.747		89.5732	1.65687		86.4458	82.694	91.452	89.6689	83.2321	88.4931		86.9976	1.44012		82.1212	80.0773	86.3967	84.7747	83.1312	77.0708		82.262	1.36511		77.4566	71.439	83.8288	78.6052	76.0999	79.1892		77.7698	1.65721
459.895		93.1734	93.638	97.2222	96.0165	95.9596	97.3941		95.5673	0.727659		89.8605	85.971	88.052	97.4403	89.5582		90.1764	1.94222		87.5502	80.8653	87.9391	85.8278	84.2041	87.6712		85.6763	1.12469		82.2222	79.8197	84.0083	84.8965	81.0364	76.5906		81.4289	1.23098		74.8555	70.1308	88.1094	79.5508	76.0999	79.4595		78.0343	2.46408
461.791		95.0185	94.086	96.6049	97.1154	97.6431	97.0684		96.256	0.568175		88.7442	87.7184	87.6623	96.2457	91.2985		90.3338	1.61842		88.1526	80.1071	88.7588	88.6093	83.7181	90.6849		86.6718	1.6148		80.9091	77.3723	82.3468	86.3581	82.9107	76.4706		81.0613	1.50373		73.4104	71.7297	83.3531	81.0875	76.0999	80.2703		77.6585	1.88534
463.681		95.203	91.4875	99.7942	97.3901	95.7913	97.557		96.2038	1.14812		88.2791	88.8168	88.8312	97.6109	88.3534		90.3783	1.81176		90.5623	78.3229	85.0117	86.8874	84.2041	90.8219		85.9684	1.89724		80.202	78.0593	85.9813	84.0439	83.7927	78.2713		81.7251	1.35958		76.0116	72.2384	84.4233	77.7778	76.0999	79.0541		77.6008	1.65554
465.576		94.4649	93.1004	95.9877	95.055	96.2963	95.9283		95.1388	0.493291		86.6047	86.1707	86.3636	96.7577	87.6841		88.7162	2.02735		87.1486	81.802	87.5878	89.0066	83.7181	92.1918		86.9091	1.51756		83.7374	80.4208	83.5929	88.4287	82.0287	75.6303		82.3065	1.72617		75.3372	70.7849	89.4174	79.669	75.8621	81.6216		78.782	2.62239
467.464		93.4502	92.8763	100.309	95.467	96.4647	94.4625		95.5049	1.09872		87.3488	88.018	90.6493	95.5631	89.9598		90.3078	1.44664		88.9558	81.4451	89.1101	86.3576	81.531	92.0548		86.5757	1.76944		83.0303	79.9055	82.1392	84.7747	79.1621	75.9904		80.8337	1.28028		73.5067	71.439	82.8775	77.5414	77.2889	79.7297		77.0639	1.68797
469.357		90.4059	94.0412	99.4856	94.2308	94.1077	97.557		94.9714	1.29186		88.5581	87.6685	89.2208	94.3686	88.3534		89.6339	1.20929		90.5623	82.2034	86.8852	88.4768	82.26	89.863		86.7085	1.50605		82.3232	77.6728	81.5161	88.7942	81.2569	75.1501		81.1189	1.89771		75.6262	70.2762	85.2557	78.8416	78.9536	77.8378		77.7985	1.99447
471.245		92.4354	92.7419	102.881	91.7582	95.4545	95.9283		95.1999	1.68443		85.7674	86.3704	87.4026	95.5631	87.0147		88.4237	1.80653		86.0442	79.3934	90.3981	87.5497	81.531	87.8082		85.4541	1.70145		81.2121	79.4762	85.5659	89.8904	80.9261	76.9508		82.3369	1.89676		75.9152	70.8576	86.4447	77.7778	77.2889	78.6487		77.8221	2.06123
473.14		94.0037	93.3244	97.2222	93.4066	94.4444	95.6026		94.6673	0.613333		91.2558	87.7184	88.052	91.4676	88.755		89.4498	0.798983		87.1486	78.8136	89.5785	87.0199	83.5966	90.8219		86.1632	1.78584		82.9293	79.9055	84.7352	86.6017	82.0287	76.7107		82.1518	1.43465		76.0116	69.7674	84.3044	79.5508	76.5755	78.9189		77.5214	1.96111
475.029		93.5424	90.009	98.9712	94.9176	94.9495	95.6026		94.6654	1.19032		91.6279	85.4718	88.4416	96.9283	88.2195		90.1378	1.95781		85.6426	81.3559	87.9391	87.5497	84.8117	88.0822		85.8969	1.05736		81.1111	79.2185	84.1121	84.7747	82.8004	75.1501		81.1945	1.46465		73.3141	69.8401	85.3745	82.1513	76.0999	80.2703		77.8417	2.37187
476.922		95.572	91.0842	98.1482	94.3681	96.4647	94.9511		95.098	0.967133		86.6047	86.8697	86.7532	96.9283	89.9598		89.4232	1.97748		86.6466	78.6797	87.9391	88.7417	83.3536	91.3699		86.1218	1.83513		83.4343	79.7338	83.5929	84.6529	82.2492	76.7107		81.729	1.21609		73.8921	69.6948	86.2069	78.2506	76.2188	80.9459		77.5348	2.33681
478.812		93.7269	94.8925	99.6914	92.7198	94.2761	95.114		95.0701	0.989075		85.7674	87.9181	88.7013	96.4164	89.1566		89.592	1.80256		88.4538	80.5085	88.8759	86.0927	85.2977	90.137		86.5609	1.4163		82.7273	78.5316	84.1121	85.0183	84.0132	77.0708		81.9122	1.34702		71.58	72.5291	88.7039	76.7139	75.1486	80.8108		77.5811	2.59714
480.706		95.1107	93.19	98.1482	95.7418	94.4444	95.9283		95.4272	0.678844		87.4419	85.8712	89.2208	100.171	88.2195		90.1848	2.55577		89.0562	80.5085	86.0656	87.2848	81.6525	89.452		85.6699	1.54182		80	78.5745	85.7736	85.1401	80.1544	78.1513		81.299	1.3553		75.0482	69.0407	85.1367	78.2506	76.0999	78.7838		77.06	2.15175
482.593		90.2214	92.5627	99.3827	94.7802	98.3165	95.114		95.0629	1.40262		86.0465	87.7184	89.4805	99.1468	87.4163		89.9617	2.36047		86.3454	78.7244	85.4801	84.6358	85.4192	88.6301		84.8725	1.3517		80.6061	77.3723	85.8775	85.3837	79.6031	77.9112		81.1256	1.50244		73.025	72.1657	84.6611	76.4775	75.6243	79.8649		76.9698	1.89939
484.49		93.3579	93.5932	100.412	94.2308	94.2761	93.6482		94.9196	1.10852		89.1163	88.2676	89.7403	100.683	91.4324		91.8478	2.26878		87.5502	78.3675	86.7682	87.0199	79.8299	88.4931		84.6715	1.7887		81.3131	79.3044	81.1007	84.6529	81.9184	78.6315		81.1535	0.868691		71.7726	70.1308	85.7313	80.4964	74.673	76.4865		76.5484	2.36239
486.378		90.9594	92.0251	96.8107	94.6429	93.4343	95.6026		93.9125	0.900021		90.6047	86.5701	89.2208	95.7338	91.1647		90.6588	1.49665		88.3534	80.6423	92.2717	88.3444	85.1762	91.7808		87.7615	1.77533		78.1818	78.3598	82.5545	82.4604	81.9184	76.2305		79.9509	1.10227		73.6994	71.5116	84.0666	77.896	76.8133	78.9189		77.151	1.78266
488.271		91.4207	93.5484	95.7819	92.8571	95.2862	94.9511		93.9742	0.680519		86.5116	87.3689	90.2597	92.3208	87.9518		88.8826	1.06059		88.3534	80.5085	89.3443	85.8278	80.8019	89.589		85.7375	1.69702		81.1111	79.3044	83.9045	84.7747	81.9184	77.431		81.4073	1.12779		72.5434	70.7122	83.2342	79.4326	77.17	79.5946		77.1145	1.92236
490.159		90.8672	93.9068	96.0905	95.6044	94.2761	94.9511		94.2827	0.758709		85.3953	85.0724	89.6104	92.6621	90.3615		88.6203	1.47201		86.9478	79.215	88.6417	90.596	83.8396	87.8082		86.1747	1.66123		81.3131	77.5011	82.243	85.5055	81.2569	79.1116		81.1552	1.1206		74.1811	70.9302	84.0666	79.4326	72.7705	78.1081		76.5815	1.98921
492.054		94.3727	91.9803	94.3416	90.6593	96.9697	96.9055		94.2049	1.0409		86.3256	84.4234	89.7403	93.0034	87.6841		88.2353	1.47448		85.1406	77.7877	91.9204	88.7417	82.8676	87.3973		85.6425	2.0145		80	79.1756	81.8276	86.1145	84.4542	77.1909		81.4605	1.37041		74.0848	69.6948	83.3531	80.2601	77.5268	77.7027		77.1037	1.94561
493.941		94.0037	90.8602	96.6049	92.7198	93.9394	98.0456		94.3623	1.06248		86.2326	89.7154	90	96.9283	90.0937		90.594	1.73955		88.755	80.1963	87.4707	86.8874	82.1385	87.8082		85.5427	1.4277		80.404	77.6728	79.3354	84.7747	80.3749	76.1104		79.7787	1.20822		72.158	70.5669	82.7586	74.7045	74.9108	79.1892		75.7147	1.84848
495.834		94.834	93.862	97.5309	94.6429	96.1279	94.9511		95.3248	0.5322		89.0233	86.5202	86.1039	97.099	89.9598		89.7412	1.9787		90.5623	82.1142	86.7682	85.298	82.6245	90.274		86.2735	1.48558		80	81.4513	81.2046	86.2363	81.6979	77.9112		81.4169	1.12026		73.8921	71.9477	83.7099	77.7778	76.0999	77.973		76.9	1.65841
497.723		92.3432	91.8459	96.9136	97.3901	97.3064	96.2541		95.3422	1.04197		89.0233	89.316	87.2727	100.341	91.0308		91.3968	2.31419		89.1566	81.3559	85.8314	87.4172	82.8676	90.9589		86.2646	1.50057		78.7879	79.6908	84.6314	86.2363	81.3671	77.3109		81.3374	1.41744		75.4335	69.9855	82.6397	78.0142	76.2188	80.2703		77.0937	1.78647
499.616		91.7897	90.4122	93.4156	93.544	94.9495	94.9511		93.177	0.731431		88	87.4189	86.6234	95.3925	90.7631		89.6396	1.59805		85.9438	80.5085	86.2998	87.0199	83.8396	88.9041		85.4193	1.18838		83.8384	80.3349	86.2928	86.4799	81.3671	75.7503		82.3439	1.66733		72.6397	71.875	84.8989	78.2506	76.8133	78.9189		77.2327	1.93759
501.505		88.4686	90.4122	94.7531	92.445	94.1077	94.4625		92.4415	1.03451		89.3023	86.9196	86.3636	98.1229	89.9598		90.1337	2.11059		87.1486	79.438	88.4075	86.2252	82.3815	91.0959		85.7828	1.72244		80.202	78.4886	83.4891	84.4093	77.7288	78.0312		80.3915	1.184		75.5299	69.8401	86.088	80.2601	71.7004	78.1081		76.9211	2.42158
503.401		90.6827	92.2491	95.8848	93.2692	93.771	95.6026		93.5766	0.810387		89.7674	86.8198	88.1818	92.1502	89.9598		89.3758	0.898624		87.751	78.5459	81.2646	84.5033	83.9611	91.3699		84.566	1.86142		78.9899	78.4886	81.6199	85.9927	81.3671	79.1116		80.9283	1.14497		75.4335	70.7122	82.8775	78.3688	75.5054	76.2162		76.5189	1.63165
505.291		91.7897	93.9516	94.7531	94.2308	97.1381	93.6482		94.2519	0.709429		90.0465	85.3719	86.7532	96.4164	90.4953		89.8167	1.91324		87.4498	77.8323	85.363	87.6821	82.503	89.0411		84.9786	1.70554		83.3333	79.4762	81.5161	86.2363	81.8082	79.2317		81.9336	1.06461		73.5067	70.3488	79.4292	76.4775	74.5541	78.3784		75.4491	1.36707
507.187		95.572	90.9498	95.8848	93.4066	96.633	96.0912		94.7562	0.886073		89.0233	86.3704	88.1818	93.3447	85.8099		88.546	1.3343		85.4418	79.9732	86.0656	84.9007	82.746	88.9041		84.6719	1.24211		81.4141	77.8016	85.2544	86.1145	80.2646	76.3505		81.2	1.59768		70.5202	68.6773	84.8989	77.7778	75.0297	77.973		75.8128	2.38485
509.072		91.6052	91.0394	96.9136	91.0714	95.1179	96.4169		93.6941	1.12687		88.4651	85.9211	86.4935	97.4403	90.0937		89.6827	2.07547		85.743	79.8394	84.7775	86.8874	81.045	87.1233		84.2359	1.25755		83.1313	78.231	81.5161	86.2363	82.3594	74.7899		81.044	1.63602		75.5299	72.311	83.9477	78.1324	76.3377	77.973		77.3719	1.57327
510.968		91.4207	90.905	96.9136	96.7033	94.2761	94.9511		94.195	1.04533		91.4419	85.9211	88.3117	96.0751	87.2825		89.8064	1.81206		90.1606	78.9474	88.5246	88.8742	84.3256	87.8082		86.4401	1.69898		80.202	79.2185	81.4123	86.3581	79.2723	76.2305		80.449	1.37357		72.8324	71.5116	84.5422	77.6596	73.7218	80.6757		76.8239	2.0727
512.865		89.4834	92.0251	93.3128	94.7802	101.01	95.4397		94.3419	1.59054		90.2326	85.7713	86.2338	98.2935	91.2985		90.3659	2.25742		88.755	80.1517	82.904	87.2848	82.26	91.9178		85.5455	1.83301		82.4242	78.3169	84.216	86.1145	80.7056	75.1501		81.1545	1.6319		74.6628	69.0407	83.4721	79.078	74.5541	81.3513		77.0265	2.15971
514.761		91.9742	92.0699	97.3251	93.8187	95.4545	93.8111		94.0756	0.837369		87.0698	85.1722	85.8442	96.587	89.9598		88.9266	2.0832		89.5582	80.9099	86.8852	85.6954	82.3815	91.6438		86.179	1.67532		83.8384	79.7767	83.3852	85.3837	82.3594	76.1104		81.809	1.36977		77.0713	68.6773	84.0666	78.487	75.7432	79.7297		77.2959	2.08107
516.652		91.9742	93.0108	93.93	94.0934	96.9697	97.0684		94.5077	0.852127		87.3488	86.3704	87.1429	93.3447	90.8969		89.0208	1.33346		84.0361	79.661	88.993	82.5166	81.6525	90.9589		84.6363	1.80246		81.1111	79.1327	82.9699	82.8258	81.8082	74.5498		80.3996	1.30139		74.3738	70.0581	84.0666	77.1868	73.9596	80.8108		76.7426	2.06903
518.545		92.8044	91.0394	96.1934	94.0934	94.2761	94.7883		93.8658	0.721198		86.1395	84.024	88.961	95.9044	89.0228		88.8103	2.00545		82.3293	77.5201	87.1194	86.755	82.9891	87.9452		84.1097	1.61881		77.9798	78.3598	82.1392	84.4093	82.8004	76.1104		80.2998	1.33193		72.6397	68.8953	83.3531	76.2411	72.5327	80.2703		75.6554	2.20181
520.434		92.3432	91.3979	94.5473	98.489	93.771	98.0456		94.7657	1.19539		86.3256	85.2222	88.1818	99.3174	87.6841		89.3462	2.54632		85.3414	79.0366	86.8852	87.6821	82.9891	89.452		85.2311	1.52721		82.3232	78.3598	84.1121	84.7747	79.0518	79.2317		81.3089	1.14025		75.4335	71.0756	87.0392	75.8865	73.4839	77.973		76.8153	2.25598
522.331		94.834	93.7276	93.6214	93.1319	94.1077	96.0912		94.2523	0.434723		89.9535	86.9695	89.7403	96.7577	90.0937		90.7029	1.61953		87.6506	78.2783	86.4169	89.9338	80.9235	88.9041		85.3512	1.91204		80.101	78.0163	83.1776	84.8965	82.1389	77.9112		81.0402	1.16137		72.2543	69.4767	86.4447	77.5414	74.5541	80.1351		76.7344	2.47659
524.222		92.8044	92.966	95.0617	97.6648	93.4343	89.7394		93.6118	1.07433		85.7674	86.021	87.4026	97.9522	88.4873		89.1261	2.26055		90.3615	80.4639	85.1288	85.9603	81.288	88.6301		85.3054	1.59852		82.3232	79.3903	83.6968	85.8709	77.5083	76.9508		80.9567	1.45965		72.158	69.3314	81.8074	79.078	74.1974	82.1622		76.4557	2.17873
526.12		94.5572	93.638	96.6049	95.467	93.266	93.4853		94.5031	0.537417		86.8837	86.3205	88.1818	94.7099	87.8179		88.7828	1.51809		87.3494	78.0999	88.4075	86.755	83.5966	87.5343		85.2904	1.58858		79.899	78.4457	83.2814	86.8453	80.2646	78.1513		81.1479	1.36179		72.5434	67.3692	84.78	74.9409	74.4352	76.6216		75.115	2.32942
528.008		93.1734	92.4283	95.5761	94.2308	95.6229	96.4169		94.5747	0.637292		90.3256	88.2676	89.2208	97.099	86.8809		90.3588	1.77757		86.5462	80.6423	88.5246	87.1523	82.9891	89.863		85.9529	1.42221		83.4343	77.9734	83.1776	81.9732	82.0287	78.1513		81.1231	0.99763		76.1079	70.2762	86.3258	74.3499	74.673	76.8919		76.4374	2.18729
529.903		94.0959	92.6971	97.6337	93.956	93.771	95.4397		94.5989	0.704405		85.7674	86.3704	88.8312	94.7099	89.4244		89.0207	1.58388		87.0482	79.1704	85.9485	85.6954	81.531	88.9041		84.7163	1.48723		82.8283	77.2005	88.162	85.5055	80.4851	77.431		81.9354	1.79931		71.9653	69.9855	83.8288	77.5414	75.5054	78.5135		76.2233	2.01975
531.793		92.6199	92.5179	96.2963	95.6044	94.6128	95.6026		94.5423	0.661499		87.4419	84.4234	89.6104	101.536	89.1566		90.4336	2.92096		89.0562	78.3675	82.0843	87.5497	83.8396	90.6849		85.2637	1.90344		81.1111	78.7033	86.3967	83.6784	79.7133	77.6711		81.2123	1.34229		73.8921	70.4942	82.0452	81.6785	74.7919	80.2703		77.1954	1.95506
533.69		90.6827	90.0986	100	93.544	95.9596	95.114		94.2331	1.49654		85.9535	86.8697	90	95.9044	86.8809		89.1217	1.82904		88.9558	78.3675	85.0117	86.6225	82.746	89.863		85.2611	1.73773		80.9091	76.9	82.3468	85.6273	80.9261	77.6711		80.7301	1.29993		70.6166	70.4942	85.2557	77.896	75.8621	78.2432		76.3946	2.25591
535.577		91.8819	91.0394	100.103	93.544	94.1077	96.9055		94.5969	1.37865		86.6047	87.3689	87.7922	94.7099	87.9518		88.8855	1.47467		88.253	79.9286	86.8852	85.6954	82.503	89.863		85.5214	1.51207		81.6162	78.3598	81.9315	82.3386	79.6031	77.1909		80.1733	0.863525		72.8324	70.2035	81.5696	76.4775	77.8835	77.7027		76.1115	1.64574
537.472		92.2509	90.457	95.5761	96.8407	94.7811	94.7883		94.1157	0.954236		82.8837	84.0739	88.961	96.0751	87.9518		87.9891	2.32081		86.747	78.769	88.8759	86.0927	81.1665	89.0411		85.1154	1.7228		81.0101	76.6423	83.4891	86.7235	82.0287	76.3505		81.0407	1.6392		71.3873	70.0581	84.6611	78.3688	73.9596	75.9459		75.7301	2.16747
539.362		92.2509	89.5161	97.5309	93.8187	88.7205	93.1596		92.4995	1.30043		83.814	86.4204	88.5714	94.8805	92.5033		89.2379	2.0038		82.7309	79.8394	85.8314	85.4305	81.1665	88.0822		83.8468	1.27637		79.596	79.8197	81.4123	83.5566	78.6108	77.9112		80.1511	0.836582		71.7726	67.3692	83.2342	80.8511	73.0083	77.4324		75.6113	2.43806
541.256		94.3727	90.9946	96.0905	91.3461	92.2559	94.4625		93.2537	0.826617		84.3721	86.1707	88.961	94.8805	88.6212		88.6011	1.77978		83.3333	78.4567	83.4895	86.755	80.3159	89.863		83.7022	1.69743		79.697	78.9609	85.1506	83.8002	81.6979	76.3505		80.9429	1.32928		72.2543	67.9506	88.4661	80.2601	75.1486	76.4865		76.761	2.88595
543.147		94.9262	92.0699	98.3539	94.3681	92.9293	97.7199		95.0612	1.03121		85.3023	85.8213	84.2857	98.2935	86.3454		88.0096	2.5934		84.5382	80.2855	84.4262	88.3444	83.7181	90		85.2187	1.41787		80.202	78.3598	83.4891	85.0183	80.7056	76.1104		80.6475	1.33165		72.5434	69.2587	84.6611	78.487	72.176	77.4324		75.7598	2.27246
545.041		92.7122	93.4588	95.8848	95.7418	91.7508	94.1368		93.9475	0.673261		86.9767	86.7699	87.1429	96.7577	88.2195		89.1733	1.91255		85.9438	79.5718	86.0656	89.0066	82.503	89.726		85.4695	1.57895		80.404	77.3293	84.4237	87.5761	80.9261	75.5102		81.0283	1.81599		70.8093	69.4041	87.0392	77.5414	73.8407	76.8919		75.9211	2.58271
546.931		95.2952	90.5914	99.5885	91.8956	95.9596	96.2541		94.9307	1.32513		87.4419	86.1707	86.4935	98.2935	87.5502		89.19	2.29135		86.8474	78.0107	85.8314	86.8874	82.3815	89.1781		84.8561	1.64017		81.4141	78.1022	85.6698	84.4093	80.1544	75.7503		80.9167	1.53005		73.5067	67.7326	84.0666	78.0142	73.6029	78.6487		75.9286	2.28345
548.826		91.1439	89.6505	97.6337	94.9176	94.1077	93.8111		93.5441	1.15356		87.3488	86.7199	87.4026	98.2935	86.8809		89.3291	2.24494		88.0522	78.1891	87.1194	88.3444	82.3815	91.9178		86.0007	2.0007		79.2929	75.6119	80.3738	83.6784	79.1621	76.8307		79.1583	1.15358		72.9287	69.5494	86.088	76.4775	74.0785	77.027		76.0249	2.29334
550.714		91.6052	93.5932	97.0165	91.8956	95.6229	93.3225		93.8426	0.863568		85.3023	86.3704	85.974	95.0512	89.5582		88.4512	1.80509		88.0522	77.9661	87.2365	87.2848	83.2321	87.3973		85.1948	1.60892		80.7071	77.3723	80.7892	83.922	78.9416	78.0312		79.9606	0.972923		74.5665	68.3866	84.78	76.0047	71.5815	79.8649		75.864	2.39066
552.608		91.0517	87.9928	98.9712	91.8956	95.2862	95.4397		93.4395	1.58916		84.186	84.3734	87.1429	96.4164	87.8179		87.9873	2.22824		86.3454	79.1258	85.8314	87.5497	82.6245	89.452		85.1548	1.51469		79.899	77.4581	82.5545	84.0439	81.2569	77.0708		80.3805	1.13491		70.7129	68.6047	86.9203	80.1418	71.3436	77.1622		75.8143	2.83947
554.5		93.6347	91.7563	96.1934	93.8187	95.6229	97.8827		94.8181	0.888919		86.6047	86.5202	86.2338	95.7338	86.6131		88.3411	1.84945		87.6506	78.6351	84.5433	85.0331	83.2321	88.7671		84.6436	1.46403		80.8081	77.3723	81.2046	83.8002	79.2723	76.5906		79.8414	1.08709		68.4008	69.7674	82.9964	78.0142	74.5541	77.973		75.2843	2.2547
556.394		91.1439	91.0842	98.6625	95.6044	94.2761	93.8111		94.097	1.16944		84.9302	86.67	87.2727	96.587	87.2825		88.5485	2.0551		86.5462	78.6797	86.8852	85.9603	83.4751	90.274		85.3034	1.59583		82.2222	77.587	84.3198	84.1656	81.1466	77.1909		81.1054	1.27344		72.736	67.9506	85.1367	76.1229	76.9322	77.027		75.9843	2.31563
558.282		91.8819	88.4409	93.3128	94.7802	93.9394	95.9283		93.0472	1.07621		84.3721	84.7728	86.4935	98.1229	88.6212		88.4765	2.52556		81.1245	78.7244	84.5433	88.7417	83.8396	89.1781		84.3586	1.68272		81.6162	76.5135	81.5161	83.313	81.8082	76.8307		80.2663	1.16805		71.7726	68.2413	84.1855	78.7234	73.8407	77.4324		75.6993	2.29971
560.178		91.8819	90.5466	101.337	92.8571	96.1279	96.5798		94.8885	1.61248		86.7907	84.8727	87.6623	96.587	86.8809		88.5587	2.05895		87.0482	78.9474	87.0023	84.2384	82.8676	90		85.0173	1.58076		77.8788	75.6548	80.27	83.6784	78.6108	75.3902		78.5805	1.2659		72.447	70.3488	82.283	76.3593	73.365	78.2432		75.5077	1.77657
562.068		92.7122	86.7383	94.0329	96.2912	95.2862	94.4625		93.2539	1.39247		86.0465	86.3704	84.026	97.6109	88.6212		88.535	2.38316		86.5462	80.5531	82.2014	83.1788	80.9235	90.6849		84.0146	1.5961		80.7071	78.4886	82.0353	85.1401	82.3594	78.1513		81.147	1.07143		69.3642	68.8227	85.3745	76.3593	72.8894	79.4595		75.3783	2.60054
563.962		94.1882	93.8172	95.3704	95.7418	95.4545	94.4625		94.8391	0.320707		83.5349	86.7699	87.5325	94.3686	89.2905		88.2993	1.78109		87.4498	79.1704	87.0023	85.8278	82.9891	89.452		85.3152	1.50498		78.7879	75.9553	82.9699	85.7491	80.4851	73.7095		79.6095	1.81284		72.158	66.8605	81.5696	77.0686	76.9322	76.7568		75.2243	2.06789
565.851		89.6679	91.5771	96.9136	94.6429	95.9596	90.228		93.1648	1.25728		88.3721	85.5217	85.7143	96.7577	85.1406		88.3013	2.19003		84.739	76.7618	89.2272	85.6954	82.8676	88.7671		84.6763	1.86546		78.3838	75.2254	82.6584	84.5311	79.2723	77.6711		79.6237	1.39176		72.3507	68.1686	83.9477	74.5863	73.8407	77.7027		75.0994	2.17951
567.744		90.7749	91.2186	98.251	93.4066	94.1077	96.5798		94.0565	1.20012		81.6744	83.3749	85.974	95.7338	86.2115		86.5937	2.43548		87.4498	76.405	85.7143	84.7682	81.288	86.1644		83.6316	1.6767		81.0101	77.6728	83.2814	85.5055	80.4851	76.7107		80.7776	1.35328		70.9056	67.8052	83.3531	76.3593	75.0297	79.3243		75.4629	2.29177
569.633		92.7122	89.6953	96.8107	92.033	99.1582	94.9511		94.2268	1.4043		84.186	84.4234	87.013	94.5392	89.9598		88.0243	1.93536		85.5422	78.6797	87.1194	85.8278	82.6245	89.452		84.8743	1.53607		78.7879	77.0288	83.0737	82.5822	81.3671	75.03		79.645	1.31943		75.3372	69.6948	81.0939	76.3593	71.7004	80.8108		75.8327	1.89504
571.528		90.7749	91.1738	97.8395	90.9341	94.2761	96.5798		93.5964	1.26865		84.5581	84.7728	88.4416	97.6109	87.1486		88.5064	2.39028		86.1446	80.8653	83.8407	85.8278	85.1762	90		85.3091	1.22328		80.202	76.6853	82.243	82.4604	80.5954	77.6711		79.9762	0.964155		71.4836	67.9506	85.4935	78.487	73.8407	77.5676		75.8038	2.50593
573.415		90.0369	90.7706	94.0329	95.7418	95.7913	94.9511		93.5541	1.03425		87.7209	85.3719	85.8442	94.0273	89.9598		88.5848	1.58258		84.4377	77.9215	85.2459	83.8411	82.3815	91.7808		84.2681	1.8389		78.3838	75.3113	82.3468	82.4604	81.6979	74.6699		79.145	1.44988		70.9056	68.0233	82.5208	75.2955	75.0297	76.8919		74.7778	2.04428
575.309		90.2214	91.9355	96.5021	92.5824	92.5926	95.2769		93.1851	0.938742		86.5116	86.8697	85.1948	94.198	86.4792		87.8507	1.61211		83.2329	77.7877	86.4169	84.6358	80.4374	87.5343		83.3408	1.50557		81.4141	77.0288	84.3198	80.7552	81.1466	76.5906		80.2092	1.19353		69.5568	67.8779	83.4721	76.8321	72.8894	78.5135		74.857	2.39556
577.197		94.5572	92.7419	96.5021	88.5989	95.7913	94.6254		93.8028	1.16464		89.3953	84.2736	87.7922	94.5392	89.6921		89.1385	1.65862		81.8273	77.2524	84.8946	84.106	77.5213	89.589		82.5318	1.92647		79.899	76.4276	84.9429	84.2875	81.4774	76.1104		80.5241	1.5411		71.9653	67.6599	82.1641	75.6501	71.5815	79.7297		74.7918	2.22583
579.093		92.9889	91.7115	93.93	93.2692	97.1381	91.5309		93.4281	0.832262		86.9767	86.3704	85.5844	92.3208	88.6212		87.9747	1.19561		85.0402	75.5129	85.2459	83.1788	84.0826	89.1781		83.7064	1.84066		82.2222	78.2739	82.5545	80.1462	80.9261	77.3109		80.239	0.860439		67.8227	67.0058	80.8561	75.5319	72.4138	74.7297		73.06	2.11485
580.983		96.0332	89.9642	98.4568	94.5055	93.9394	95.9283		94.8046	1.16015		83.2558	84.3235	85.5844	97.2696	89.6921		88.0251	2.55583		85.9438	78.1891	87.4707	88.6093	80.9235	84.3836		84.2533	1.63364		80.9091	76.857	82.866	84.6529	80.9261	76.4706		80.447	1.32519		74.0848	69.3314	82.0452	78.1324	73.0083	78.2432		75.8076	1.85283
582.877		92.5277	89.6953	97.428	93.4066	94.6128	93.6482		93.5531	1.03444		86.7907	84.5232	83.8961	94.3686	89.6921		87.8541	1.91974		85.3414	76.2266	85.4801	84.2384	83.8396	85.4794		83.4343	1.46932		78.3838	77.2005	82.5545	83.8002	81.5876	76.1104		79.9395	1.27859		72.8324	66.3517	83.7099	80.3782	71.7004	78.7838		75.6261	2.62762
584.768		92.5277	90.4122	97.9424	93.544	95.9596	94.7883		94.1957	1.08047		84.9302	85.7713	88.1818	95.3925	88.6212		88.5794	1.84092		86.5462	77.2524	82.7869	82.9139	81.531	86.4384		82.9115	1.40944		79.899	74.5384	80.3738	83.8002	81.8082	77.7911		79.7018	1.31701		72.8324	68.4593	84.1855	75.6501	74.9108	78.5135		75.7586	2.16929
586.662		93.8192	91.2186	95.9877	91.2088	96.1279	94.9511		93.8856	0.910394		83.0698	84.6231	87.013	93.3447	89.1566		87.4414	1.80317		88.755	75.2007	82.4356	85.0331	82.746	87.9452		83.6859	2.00081		80.303	77.1576	81.3084	84.2875	79.7133	76.9508		79.9534	1.12		71.7726	68.75	80.8561	74.7045	73.7218	78.7838		74.7648	1.82098
588.551		89.8524	91.0394	96.8107	92.445	92.9293	94.7883		92.9775	1.02925		87.4419	85.5716	84.9351	96.2457	89.9598		88.8308	2.04919		83.9357	76.4496	83.7237	81.9868	82.017	86.7123		82.4708	1.39525		78.8889	76.5135	81.1007	84.1656	77.9493	78.5114		79.5216	1.11059		71.3873	66.6424	78.9536	73.8771	72.8894	78.2432		73.6655	1.86262
590.445		94.4649	91.353	96.7078	93.6813	93.6027	91.0423		93.4754	0.854604		85.1163	84.5731	88.1818	97.6109	88.4873		88.7939	2.34039		85.4418	76.7172	83.9578	81.9868	82.017	87.3973		82.9196	1.50159		80.6061	78.231	79.0239	85.0183	79.3826	76.4706		79.7887	1.18607		72.0617	66.6424	83.4721	78.8416	73.4839	79.0541		75.5926	2.46064
592.334		92.1587	90.0538	95.2675	94.2308	99.3266	94.9511		94.3314	1.28116		85.7674	85.3719	84.9351	96.587	89.4244		88.4172	2.19295		86.5462	76.0482	87.4707	83.3113	82.746	87.8082		83.9884	1.81024		78.6869	77.2864	80.893	83.4348	81.1466	78.1513		79.9332	0.937896		71.869	68.532	82.1641	75.6501	72.4138	75.8108		74.4066	1.90279
594.232		92.7122	90.0538	96.7078	93.1319	91.9192	94.1368		93.1103	0.911336		86.7907	82.9755	83.7662	96.7577	87.0147		87.461	2.45812		84.1365	78.4567	86.0656	85.6954	81.8955	89.726		84.3293	1.57536		78.9899	77.5011	79.4393	80.3898	79.8236	77.0708		78.8691	0.537539		71.1946	66.4244	83.2342	73.0496	72.7705	79.5946		74.378	2.47243
596.121		91.3284	91.2186	96.1934	92.7198	96.8013	95.2769		93.9231	1.01268		84.186	85.7214	87.9221	95.3925	89.826		88.6096	1.94768		81.5261	77.5201	84.3091	86.2252	83.4751	88.0822		83.523	1.51362		81.7172	75.1825	82.6584	83.1912	81.8082	76.5906		80.1913	1.39142		71.869	68.4593	82.283	74.7045	72.2949	78.9189		74.7549	2.06582
																																													56.49606*		55.49264*	65.24927*
																																													57.57874*		57.07814*	63.48974*
																																													57.52953*
																																													59.05512*
																																													57.18504*
																																													57.18504*
																																													56.49606*
																																													57.62795*
																																													58.16929*
																																													58.2185*
																																													56.79134*
																																													56.84055*

## Sheet: Figure 1f
Figure 1f	Mean Michaelis Menten Plot													Figure 1f	n=1		Kinetic Data with non-subtracted signal				Signal Deviation post addition of Chloride																Figure 1f	n=2		Kinetic Data with non-subtracted signal				Signal Deviation post addition of Chloride
										Velocity (mM.min-1)
Chloride Concentration (mM)			Velocity (mM.min-1)							Mean	SEM						0	Velocity	2.5	Velocity	5	Velocity	10	Velocity	20	Velocity	40	Velocity	80	Velocity	160	Velocity	240	Velocity						0	Velocity	2.5	Velocity	5	Velocity	10	Velocity	20	Velocity
	0		0.713012	1.35137	0.73854	0.724277	0.284695	0.495207		0.717849	0.145948			ms	min		mM	mM.min	mM	mM.min	mM	mM.min	mM	mM.min	mM	mM.min	mM	mM.min	mM	mM.min	mM	mM.min	mM	mM.min			ms	min		mM	mM.min	mM	mM.min	mM	mM.min	mM	mM.min	mM	mM.min
	2.5		1.66871	1.75747		1.50341	0.501231	0.982597		1.28268	0.237053							0.713012		1.66871		1.496		1.78145		2.46283		3.01981		3.90583		4.73734		5.28504							1.35137		1.75747		2.30769		2.38615		3.01801
	5		1.496	2.30769	0.585088	1.76661	2.0486	1.0699		1.54565	0.260381			0	0		0		0		0		0		0		0		0		0		0				0	0		0		0		0		0		0
	10		1.78145	2.38615	1.62061	2.04188	2.63441	1.55045		2.00249	0.17768			2335	0.0389167		1.19926		1.2093		0.40161		-1.3131		-0.7707		1.18343		4.60333		1.39303		1.40845				1850	0.0308333		1.38889		0.74888		3.70205		-0.7299		1.59884
	20		2.46283	3.01801	1.68142	2.42938	3.28614	1.93951		2.46955	0.249758			4678	0.0779667		1.10701		1.11628		1.30522		-1.0101		-0.578		-1.4793		4.50539		1.79104		1.29108				3703	0.0617167		1.43369		-0.9985		-1.8287		0.98755		1.81686
	40		3.01981	3.85647	2.74654	3.43021	3.97322	2.6767		3.28383	0.227421			7015	0.116917		3.50554		-0.093		-1.4056		-1.0101		0		-0.6903		4.60333		5.87065		1.87793				5554	0.0925667		-3.5842		0.94858		0.84746		-1.6316		5.01453
	80		3.90584	4.51706	2.69886	3.57051	4.92974	3.08041		3.78374	0.345595			9356	0.155933		2.02952		2.32558		-3.2129		1.71717		-0.8671		2.07101		3.91773		2.38806		1.64319				7416	0.1236		-0.6272		0		1.5165		-2.1898		1.96221
	160		4.73734	5.2036	3.66066	3.85179	5.37747	3.36279		4.36561	0.347893			11693	0.194883		1.84502		2.04651		1.40562		1.11111		1.25241		-2.2682		6.07248		4.97512		1.29108				9267	0.15445		-0.2688		-0.4493		1.11508		-4.1649		1.74419
	240		5.28504	5.70488	4.30061	4.46561	5.89736	3.5502		4.86728	0.372125			14038	0.233967		1.47601		-2.8837		-1.506		0.90909		3.66089		4.14201		7.9334		8.85572		2.69953				11120	0.185333		-1.2097		-1.8972		0.57984		1.24517		2.68895
			n1	n2	n3	n4	n5	n6						16363	0.272717		-0.9225		-2.6047		-0.7028		0.20202		3.75723		-0.3945		5.38688		6.56716		3.16901				12972	0.2162		-2.4642		-0.9486		2.14095		0.21468		2.10756
														18709	0.311817		0.1845		0.18605		-1.506		2.42424		1.25241		3.94477		8.32517		9.65174		4.69484				14826	0.2471		-1.0753		1.09835		1.96253		2.23272		1.38081
									Mean	SEM				21039	0.35065		-0.2768		0		-0.1004		-2.1212		4.14258		2.26824		8.22723		4.87562		3.6385				16673	0.277883		-2.1953		1.1982		-0.6244		-0.7299		4.14244
	Km	18.93	10.49	27.8	8.438	14.42	13.08		15.5263	2.858				23374	0.389567		6.64207		-2.3256		1.00402		2.12121		0.4817		1.18343		7.14985		6.76617		3.28638				18530	0.308833		-2.1953		-0.3495		4.28189		2.70502		5.01453
		n1	n2	n3	n4	n5	n6							25724	0.428733		3.50554		-0.2791		-0.4016		0		2.40848		2.16963		6.17042		6.66667		5.75117				20379	0.33965		0.62724		1.34798		1.11508		4.079		4.72384
														28069	0.467817		1.29151		0		1.90763		-1.3131		6.45472		2.5641		10.0881		7.46269		5.39906				22235	0.370583		-4.7939		-1.0484		5.21855		2.66209		4.65116
	Vmax	5.206	5.383	4.383	4.137	5.913	3.616		4.773	0.353762				30397	0.506617		-0.2768		-0.5581		0.1004		2.42424		3.27553		3.0572		9.01077		4.77612		4.22535				24098	0.401633		-0.7616		0.34948		3.38983		-1.0305		5.23256
		n1	n2	n3	n4	n5	n6							32733	0.54555		2.76753		-1.7674		-0.7028		-0.8081		2.79383		1.57791		10.0881		7.66169		2.23005				25954	0.432567		-1.4785		1.04843		2.76539		3.17733		7.12209
														35068	0.584467		1.93727		-1.8605		0.40161		2.52525		4.52794		2.95858		7.44368		6.76617		3.6385				27802	0.463367		-0.2688		-0.1997		4.50491		1.24517		5.52326
														37412	0.623533		0.92251		-3.3488		1.30522		3.43434		3.17919		4.33925		7.2478		9.25373		7.62911				29657	0.494283		-3.7186		-1.0984		2.31936		4.079		4.86919
														39729	0.66215		2.67528		-2.1395		-3.1124		1.61616		3.56455		3.15582		12.047		6.36816		5.39906				31507	0.525117		0.44803		0.24963		1.4273		1.76041		7.92151
														42084	0.7014		1.93727		0.46512		-3.5141		0.60606		4.4316		2.76134		7.9334		8.55721		9.2723				33361	0.556017		-1.5233		-2.0969		2.49777		5.19536		9.88372
														44411	0.740183		1.10701		-2.2326		-0.3012		5.05051		6.84008		6.21302		12.8306		8.85572		9.38967				35226	0.5871		-2.1505		-0.2996		0.57984		4.85187		8.93895
														46748	0.779133		1.19926		-0.6512		-1.1044		1.91919		7.80347		5.81854		10.0881		9.95025		10.9155				62393	1.03988		-1.0305		1.94708		1.24888		4.33663		9.22965
														49100	0.818333		0.73801		-3.3488		-4.2169		2.32323		6.1657		5.42406		9.79432		7.9602		7.62911				64241	1.07068		-0.9857		1.44783		5.21855		2.4474		8.7936
														51420	0.857		2.67528		-4		-1.8072		3.13131		6.45472		5.6213		13.2223		10.4478		9.85915				66092	1.10153		-3.8978		2.64603		3.12221		5.71061		9.88372
														53756	0.895933		-0.2768		-0.3721		-1.4056		2.82828		6.45472		0.88757		11.6552		8.0597		7.98122				67947	1.13245		-0.8961		0.7988		6.73506		5.62473		4.36047
														56115	0.93525		-0.738		1.2093		-2.8112		5.35354		8.28516		7.79093		13.1244		9.75124		9.50704				69802	1.16337		-1.7473		1.94708		0.57984		5.75354		9.375
														58428	0.9738		0.73801		-1.0233		-2.1084		5.15152		7.22543		3.15582		10.9696		10.8458		7.51174				71649	1.19415		-1.6577		0.54918		5.843		5.58179		11.7006
														60768	1.0128		-1.1993		-1.9535		-0.7028		3.83838		5.10597		4.14201		11.1655		12.6368		12.3239				73501	1.22502		-3.7186		1.49775		2.45317		2.7909		8.64826
														63103	1.05172		3.13653		-1.4884		1.60643		3.83838		6.45472		3.94477		13.4182		13.6318		11.7371				75346	1.25577		-1.1201		1.89715		2.85459		5.49592		10.6831
														65456	1.09093		-1.3838		0.46512		0.90361		7.67677		3.9499		9.66469		12.145		11.6418		13.2629				77205	1.28675		-2.6882		0.9985		5.04014		6.8699		9.15698
														67789	1.12982		0.55351		1.2093		-0.9036		2.82828		6.6474		4.73373		13.0264		11.7413		9.38967				79058	1.31763		-2.4642		1.5976		3.92507		5.45298		10.7558
														70146	1.1691		1.01476		-1.1163		3.11245		2.0202		7.99615		5.81854		13.4182		9.25373		13.0282				80925	1.34875		-2.3297		1.69745		3.21142		3.90726		9.44767
														72474	1.2079		-0.1845		-3.4419		2.40964		3.83838		11.946		7.88955		14.2018		15.9204		10.0939				82770	1.3795		-2.5538		2.99551		6.28903		6.78403		12.064
														74802	1.2467		1.47601		-0.7442		-0.4016		2.82828		6.06936		7.10059		15.1812		11.8408		12.5587				84633	1.41055		-2.7778		2.79581		5.26316		6.8699		13.5901
														77130	1.2855		0.09225		-1.3023		-1.6064		5.15152		6.74374		5.52268		11.8511		11.8408		13.7324				86478	1.4413		-1.0305		2.64603		5.30776		5.96823		12.4273
														79458	1.3243		1.38376		-1.6744		1.70683		6.76768		7.61079		4.24063		14.4956		13.4328		14.4366				88336	1.47227		-2.1953		1.84723		4.28189		7.94332		10.5378
														81781	1.36302		0.369		1.76744		2.61044		3.83838		7.41811		7.19921		13.5162		11.3433		12.7934				90187	1.50312		-3.405		1.34798		5.843		6.22585		13.8808
														84130	1.40217		-0.1845		2.7907		-0.3012		6.46465		8.8632		4.33925		14.2018		14.3284		15.1409				92040	1.534		2.28495		0.89865		5.97681		6.65522		10.4651
														86463	1.44105		2.76753		-3.5349		2.30924		5.25253		7.89981		7.19921		15.1812		14.4279		12.7934				93886	1.56477		-0.9409		1.54768		6.86887		7.81451		12.282
														88795	1.47992		1.93727		0.46512		1.00402		3.43434		7.51445		7.10059		14.3976		15.8209		15.7277				95745	1.59575		0.40323		4.69296		7.53791		8.80206		13.2267
														91123	1.51872		0.46125		-0.093		-1.6064		4.74747		8.57418		7.00197		16.4545		14.4279		17.3709				97598	1.62663		-1.7473		3.89416		8.25156		7.2134		12.718
														93464	1.55773		0.92251		-0.7442		0.60241		4.44444		7.99615		4.63511		14.2018		12.7363		15.1409				99455	1.65758		-1.6129		1.64753		8.60839		7.38514		11.9186
														95800	1.59667		-0.5535		0.55814		0.50201		4.34343		8.47784		5.32544		14.7894		15.0249		17.9578				101310	1.6885		-2.0161		3.04543		7.71632		8.41563		13.2994
														98150	1.63583		1.01476		0.09302		3.11245		8.18182		10.0193		9.66469		15.3771		15.4229		19.4836				103171	1.71952		0.89606		1.44783		7.49331		8.15801		11.9186
														100471	1.67452		0.64576		-1.0233		1.10442		5.75758		12.0424		6.1144		18.7071		16.6169		18.8967				105027	1.75045		-0.0448		3.79431		4.72792		7.77158		10.3924
														102814	1.71357		1.84502		-3.6279		4.21687		5.55556		8.95954		9.07298		16.4545		14.9254		17.4883				106885	1.78142		2.73297		2.99551		7.18109		9.36024		13.8808
														105150	1.7525		0.1845		1.30233		0.80321		6.76768		10.5973		10.0592		17.3359		14.6269		18.5446				108730	1.81217		-1.3441		4.74289		9.36664		9.83255		13.5174
														107482	1.79137		2.95203		-1.0233		2.00803		6.46465		11.1753		10.355		18.2174		19.602		19.3662				110598	1.8433		-1.7025		5.04244		6.73506		8.54444		13.4448
														109807	1.83012		-0.0923		2.4186		1.10442		6.06061		6.84008		7.19921		15.6709		18.5075		20.7746				112447	1.87412		1.65771		3.04543		4.28189		10.4337		13.6628
														112153	1.86922		-1.1993		0.09302		1.00402		6.9697		8.57418		8.28402		19.5886		17.1144		18.7793				114302	1.90503		0.44803		3.84423		10.6155		12.0223		15.189
														114493	1.90822		1.93727		-0.4651		2.71084		8.18182		8.57418		9.1716		20.3722		21.194		22.5352				116156	1.93593		-1.7921		3.89416		7.80553		7.77158		14.8983
														116838	1.9473		0.92251		-2.2326		2.61044		10.202		6.6474		8.77712		19.4907		18.5075		20.7746				118016	1.96693		0.94086		3.44483		10.8385		9.23143		16.7151
														119173	1.98622		0.92251		-2.4186		1.40562		5.75758		7.80347		12.3274		18.7071		16.2189		20.0704				119869	1.99782		0.80645		5.09236		8.8314		11.1636		14.4622
														121509	2.02515		0.369		1.5814		3.31325		8.18182		9.92293		10.6509		19.4907		20.0995		21.0094				121730	2.02883		0.35842		3.14528		9.54505		7.90039		14.9709
														123853	2.06422		1.56827		-2.7907		5.32129		5.05051		6.06936		10.5523		17.9236		21.2935		18.3099				123590	2.05983		2.37455		4.14378		7.18109		9.01675		18.532
														126190	2.10317		3.59779		-1.4884		1.60643		7.27273		10.4046		9.07298		18.2174		16.6169		22.3005				125444	2.09073		0.71685		4.04393		10.0357		10.6913		13.9535
														128519	2.14198		2.39852		1.02326		3.01205		7.37374		8.8632		7.39645		18.4133		19.801		23.0047				127293	2.12155		4.39068		3.79431		8.74219		7.77158		15.0436
														130868	2.18113		1.56827		1.30233		1.30522		6.06061		9.92293		4.93097		16.3565		17.5124		22.5352				129157	2.15262		-1.1649		2.39641		9.05442		10.6483		14.6076
														133198	2.21997		2.21402		-1.8605		2.61044		8.9899		11.4643		8.28402		20.3722		20.4975		22.5352				131012	2.18353		-0.8065		3.59461		9.14362		11.8506		16.2791
														135537	2.25895		2.39852		-1.5814		0		9.79798		8.18882		8.08679		21.6454		19.801		18.662				132876	2.2146		1.12007		3.04543		9.99108		10.6054		14.6076
														137869	2.29782		-0.2768		-0.3721		3.61446		10.7071		7.70713		9.27022		18.6092		21.194		21.9484				134729	2.24548		1.34409		5.39191		6.86887		10.7342		15.189
														140212	2.33687		2.39852		0.09302		2.30924		9.59596		11.657		12.0316		20.5681		20.199		22.3005				136595	2.27658		2.19534		2.54618		9.94648		12.2799		16.6424
														142540	2.37567		2.39852		0		2.20884		8.88889		10.212		10.6509		20.3722		21.194		24.4132				138448	2.30747		-0.2688		4.49326		8.96521		9.40318		16.2064
														144886	2.41477		0.27675		1.95349		4.51807		6.36364		11.2717		11.5385		21.7434		23.7811		26.9953				140304	2.3384		2.15054		2.64603		10.1249		12.7523		16.061
														147227	2.45378		2.02952		1.5814		5.12048		8.58586		11.7534		10.6509		21.0578		22.4876		26.0563				142156	2.36927		2.01613		3.54468		10.6601		8.5015		18.968
														149571	2.49285		2.49077		-1.1163		4.71888		8.58586		13.5838		11.5385		20.0784		23.1841		26.7606				144014	2.40023		-1.9265		7.13929		8.65299		12.7523		15.843
														151914	2.5319		3.41328		2.04651		3.71486		8.88889		8.67052		13.215		21.4496		23.4826		26.1737				145863	2.43105		0.40323		6.24064		10.7047		13.9116		17.2238
														154232	2.57053		1.93727		2.97674		4.81928		10.101		11.1753		11.7357		20.0784		23.1841		26.6432				147726	2.4621		0.08961		4.89266		11.1062		12.1511		18.4593
														156571	2.60952		3.13653		1.67442		6.62651		10.202		10.6936		13.1164		22.9187		24.7761		28.2864				149572	2.49287		3.80824		5.59161		8.02855		10.8201		16.4971
														158915	2.64858		2.58303		2.04651		5.62249		7.77778		9.44123		11.3412		21.2537		25.0746		25.8216				151423	2.52372		2.01613		4.64304		9.67886		13.6969		17.5872
														161243	2.68738		2.02952		3.53488		6.4257		8.9899		11.657		11.6371		22.429		25.5721		28.2864				153279	2.55465		-0.4032		5.79131		10.9724		10.9489		16.2791
														163590	2.7265		2.21402		3.16279		6.72691		9.89899		11.079		11.2426		23.3105		22.7861		26.9953				155138	2.58563		2.46416		7.68847		10.7493		11.3353		18.314
														165930	2.7655		2.30627		3.44186		2.30924		8.58586		11.079		13.1164		22.0372		23.7811		27.5822				156991	2.61652		0.85125		4.54319		11.7306		10.2619		18.4593
														168275	2.80458		5.4428		1.76744		2.91165		8.88889		11.8497		13.215		22.1352		24.1791		29.3427				158846	2.64743		2.06093		4.19371		10.5263		11.8935		18.532
														170617	2.84362		0.09225		0.46512		1.70683		8.68687		12.2351		12.3274		22.1352		22.6866		27.3474				160694	2.67823		1.20968		7.63854		8.96521		13.6539		18.1686
														172953	2.88255		1.84502		1.5814		6.4257		10		12.7168		9.27022		21.4496		24.7761		27.9343				162559	2.70932		1.20968		6.39041		11.3292		13.611		19.6221
														175283	2.92138		2.95203		1.95349		5.32129		9.89899		13.8728		11.0454		21.5475		26.3682		30.0469				164413	2.74022		2.06093		6.64004		10.7047		13.3104		16.2791
														177630	2.9605		3.87454		1.5814		6.62651		8.9899		10.4046		11.2426		22.6249		25.4726		26.2911				166280	2.77133		3.00179		6.34049		12.7119		13.8686		17.7326
														179955	2.99925		3.87454		2.32558		3.61446		9.09091		11.2717		14.497		22.1352		26.1692		26.7606				168131	2.80218		2.55376		7.93809		9.32203		12.9669		18.8953
														182294	3.03823		6.64207		0.83721		4.81928		10.8081		13.9692		11.9329		24.192		25.7711		27.6995				169982	2.83303		0.53763		4.94259		12.3996		12.3229		20.5669
														184622	3.07703		3.13653		4.46512		4.41767		9.09091		12.1387		14.2012		22.7228		29.0547		29.108				171836	2.86393		0.71685		7.18922		10.5709		13.1816		19.5494
														186967	3.11612		3.41328		5.39535		10.743		7.07071		13.1021		12.0316		23.5064		27.5622		31.338				173694	2.8949		0.58244		6.49026		12.4888		9.87548		18.532
														189296	3.15493		2.21402		4		5.82329		7.77778		14.2582		12.7219		26.3467		29.4527		33.6855				175544	2.92573		2.86738		7.53869		12.5781		12.1511		18.3866
														191639	3.19398		2.67528		3.25581		6.1245		8.48485		12.3314		13.4122		27.7179		28.7562		30.0469				177398	2.95663		-0.8961		5.64154		12.8903		14.1692		18.314
														193967	3.23278		3.50554		3.25581		6.2249		10.202		12.8131		13.1164		25.1714		28.8557		33.8028				179250	2.9875		3.80824		6.78982		12.9795		11.2065		18.3866
														196311	3.27185		1.56827		1.30233		6.5261		10.9091		14.5472		12.6233		28.1097		29.7512		32.277				181108	3.01847		5.73477		6.88967		13.3363		11.2924		20.4215
														198654	3.3109		4.33579		0.74419		4.51807		10.7071		13.4875		16.8639		24.2899		29.9502		31.4554				182966	3.04943		3.80824		7.88817		11.6414		13.3534		18.968
														200990	3.34983		3.96679		4.46512		3.71486		10.9091		10.9827		12.8205		25.1714		30.1492		33.3333				184817	3.08028		1.12007		4.89266		12.5781		11.8935		20.5669
														203327	3.38878		2.21402		0.55814		5.22088		11.6162		13.1985		13.3136		25.4652		28.6567		32.277				186663	3.11105		2.10573		7.88817		12.8903		12.924		18.8953
														205670	3.42783		4.24354		4.46512		8.33333		11.8182		14.7399		12.2288		26.6406		28.5572		34.8591				188530	3.14217		3.62903		4.49326		12.132		15.0708		21.2209
														208001	3.46668		5.53506		2.4186		6.5261		10.101		14.1619		14.6943		25.857		28.9552		33.0986				190381	3.17302		3.00179		8.58712		14.0946		12.7093		19.9128
														210343	3.50572		1.47601		1.67442		7.12851		12.2222		15.4143		14.0039		26.0529		29.5522		34.9765				192236	3.20393		0.58244		6.83974		14.3622		13.2675		19.3314
														212668	3.54447		4.05904		2.69767		5.22088		10.8081		16.6667		15.9763		25.3673		30.9453		34.3897				194091	3.23485		1.92652		6.93959		12.4442		13.7827		21.3663
														215013	3.58355		1.56827		4.18605		6.5261		10.404		16.6667		13.1164		28.1097		31.3433		33.8028				195941	3.26568		4.16667		6.93959		14.0054		13.7398		18.3866
														217343	3.62238		5.2583		0.93023		4.51807		10.505		13.2948		17.5542		26.6406		30.2488		34.2723				197793	3.29655		2.91219		4.69296		12.8903		13.6539		21.3663
														219690	3.6615		2.02952		1.5814		3.91566		10.505		15.1252		15.6805		25.7591		29.2537		35.0939				199656	3.3276		3.31541		8.98652		12.132		13.8257		20.0581
														222017	3.70028		6.36531		3.34884		9.23695		13.2323		14.4509		16.1736		27.3261		32.2388		34.8591				201500	3.35833		1.74731		7.83824		12.5335		14.0833		21.2936
														224358	3.7393		2.67528		3.53488		5.52209		9.59596		16.5703		15.8777		26.8364		29.1542		34.9765				203353	3.38922		2.19534		7.43884		12.4442		13.9545		20.0581
														226691	3.77818		3.13653		2.69767		8.73494		10.404		11.368		15.8777		26.8364		29.1542		36.9718				205215	3.42025		2.68817		9.63555		12.6227		11.2924		22.2384
														229032	3.8172		2.58303		5.95349		9.53815		11.1111		15.5106		13.5109		29.383		32.6368		38.4977				207073	3.45122		4.7491		6.59011		13.1133		12.7093		21.875
														231369	3.85615		-0.6458		3.44186		5.72289		8.78788		13.1985		14.8915		25.857		29.5522		35.7981				208927	3.48212		2.77778		7.73839		12.3104		15.4143		21.1483
														233700	3.895		3.87454		3.81395		3.71486		12.9293		16.8593		15.6805		30.9501		34.6269		38.1455				210780	3.513		2.77778		8.58712		13.2025		16.316		21.875
														236033	3.93388		3.87454		3.34884		5.12048		11.2121		15.2216		15.0888		28.9912		33.4328		37.0892				212634	3.5439		1.70251		8.53719		15.9679		13.5251		20.7849
														238375	3.97292		3.22878		3.72093		7.93173		10.303		13.0058		14.7929		27.7179		32.2388		38.4977				214495	3.57492		3.44982		8.98652		13.8715		14.0404		22.8198
														240703	4.01172		2.67528		4.65116		7.22892		11.2121		14.9326		16.075		26.3467		32.7363		38.3803				216345	3.60575		3.0914		6.49026		13.1579		12.924		22.093
														243044	4.05073		2.39852		4.65116		9.03614		9.09091		16.2813		14.6943		27.4241		32.9353		39.0845				218197	3.63662		3.0914		7.53869		14.4068		12.7952		22.1657
														245373	4.08955		2.76753		5.02326		7.83133		13.7374		18.6898		17.7515		29.285		34.4279		38.4977				220045	3.66742		2.50896		7.93809		14.3622		16.0155		21.439
														247716	4.1286		4.33579		3.06977		6.92771		10.7071		16.0886		16.7653		27.9138		32.3383		39.7887				221901	3.69835		3.71864		6.93959		15.2988		15.7149		22.2384
														250035	4.16725		3.50554		6.60465		6.72691		11.5152		13.4875		17.357		29.5788		33.1343		37.7934				223749	3.72915		3.36022		7.43884		13.2917		14.6844		21.0029
														252372	4.2062		4.7048		5.48837		5.12048		11.4141		14.9326		18.5404		31.048		34.4279		37.6761				225610	3.76017		4.16667		7.63854		13.3809		13.7827		20.7849
														254701	4.24502		4.7048		7.06977		7.12851		11.8182		16.8593		20.217		28.5994		32.3383		39.7887				227458	3.79097		1.74731		7.58862		14.3622		16.4019		23.3285
														257043	4.28405		6.27306		5.39535		7.22892		13.5353		15.7033		19.8225		30.8521		34.3284		39.7887				229313	3.82188		1.12007		7.78832		14.719		14.6415		23.6919
														259367	4.32278		3.78229		4.93023		7.12851		12.3232		18.0154		15.5819		29.8727		34.8259		40.493				231173	3.85288		4.30108		7.58862		14.9866		14.8991		21.9477
														261715	4.36192		2.67528		7.16279		6.72691		13.5353		15.2216		17.2584		29.0891		33.0348		42.2535				233033	3.88388		5.42115		7.28907		12.7119		16.4878		23.1105
														264043	4.40072		3.96679		7.72093		9.23695		13.8384		15.6069		17.1598		30.9501		35.9204		42.6056				234883	3.91472		3.58423		8.53719		14.4514		14.985		22.5291
														266371	4.43952		3.69004		7.44186		9.43775		12.8283		17.9191		17.4556		31.1459		33.8308		40.8451				236748	3.9458		1.5681		6.19071		14.496		14.7703		21.1483
														268699	4.47832		4.42804		6.51163		7.22892		11.4141		15.7996		17.7515		30.1665		35.3234		41.9014				238599	3.97665		5.24194		7.73839		14.5852		17.5612		22.6744
														271043	4.51738		3.04428		3.90698		5.32129		11.1111		18.5935		18.0473		31.6356		33.2338		42.6056				240451	4.00752		4.48029		7.98802		15.5665		15.4573		21.9477
														273364	4.55607		1.75277		8.46512		8.63454		16.4647		18.3044		17.6529		33.6925		37.4129		41.5493				242299	4.03832		5.01792		7.58862		14.5406		16.5307		22.9651
														275716	4.59527		2.49077		6.69767		9.23695		9.29293		16.474		20.0197		32.6151		35.9204		41.0798				244155	4.06925		4.25627		9.1363		13.1579		15.1567		24.2733
														278043	4.63405		4.15129		4.83721		6.92771		16.2626		16.6667		19.3294		29.1871		36.8159		41.5493				246008	4.10013		4.92832		9.43585		14.2284		15.8008		21.875
														280371	4.67285		7.47232		4.27907		10.8434		14.0404		18.0154		21.7949		32.4192		36.0199		40.1409				247865	4.13108		2.10573		10.5841		15.8787		18.2482		23.2558
														282702	4.7117		4.05904		5.76744		9.43775		12.5252		18.0154		19.7239		32.3213		38.806		42.8404				249712	4.16187		1.65771		7.93809		13.8269		17.3036		21.439
														285048	4.7508		2.02952		7.25581		6.5261		10.6061		16.2813		20.4142		32.1254		35.6219		43.5446				251572	4.19287		2.01613		7.18922		14.6744		16.5736		23.0378
														287402	4.79003		4.05904		8.37209		6.5261		14.0404		18.0154		19.9211		34.1822		37.7114		44.1315				253426	4.22377		4.12186		9.5357		15.3881		14.3409		22.8924
														289731	4.82885		4.79705		5.67442		7.83133		14.3434		16.3777		19.1321		31.3418		37.5124		43.7793				255281	4.25468		5.19713		8.9366		14.3622		16.316		24.4913
														292059	4.86765		6.18081		4.93023		8.73494		14.4444		18.9788		21.1045		33.3007		38.3085		45.3052				257137	4.28562		6.13799		9.23615		16.6815		14.8991		23.5465
														294403	4.90672		6.08856		7.34884		5.62249		12.3232		17.8227		19.3294		33.2027		38.607		44.7183				258995	4.31658		3.98746		10.3345		15.3434		16.0584		23.1105
														296746	4.94577		2.39852		6.32558		4.71888		13.6364		16.6667		21.8935		33.7904		37.8109		45.4225				260845	4.34742		3.0914		8.68697		16.6815		16.6166		24.8547
														299070	4.9845		2.21402		8.18605		11.5462		13.5353		16.6667		17.8501		33.4966		37.3134		44.1315				262698	4.3783		5.01792		9.5357		14.6298		15.3285		24.8547
														301412	5.02353		2.02952		6.13953		9.53815		16.4647		18.9788		18.9349		33.3007		38.1095		45.892				264546	4.4091		4.88351		8.03794		15.165		17.7759		22.093
														303762	5.0627		4.8893		7.06977		6.2249		11.7172		16.474		19.3294		32.9089		39.1045		43.5446				266410	4.44017		4.79391		9.98502		16.1463		18.2052		25.2907
														306105	5.10175		3.32103		9.2093		10.1406		11.0101		19.2678		20.217		33.8883		36.0199		45.1878				268254	4.4709		4.25627		9.7354		14.4514		16.4019		25
														308434	5.14057		6.18081		5.86047		12.0482		15.4545		18.6898		18.9349		31.7336		35.7214		44.6009				270110	4.50183		1.92652		9.03645		16.9046		15.8008		24.9273
														310761	5.17935		3.69004		6.23256		9.63855		15.6566		20.9056		22.7811		33.3007		38.5075		44.0141				271958	4.53263		3.22581		9.78532		15.6557		17.5612		23.9826
														313098	5.2183		3.50554		9.2093		8.33333		13.4343		19.5568		22.4852		34.0842		40.199		45.5399				273807	4.56345		5.19713		9.1363		13.0241		15.5002		26.3808
														315430	5.25717		8.57934		6.97674		9.93976		12.9293		17.052		23.1755		33.1048		38.806		46.1268				275659	4.59432		5.28674		7.03944		17.083		17.2177		25.8721
														317768	5.29613		5.2583		8.83721		7.02811		17.4748		17.2447		21.6963		35.6513		41.393		47.77				277511	4.62518		6.2724		9.18622		16.0125		15.1997		24.6366
														320107	5.33512		3.59779		7.81395		7.73092		16.8687		20.8093		21.1045		33.6925		38.209		47.0657				279361	4.65602		4.79391		10.5841		14.942		16.9171		25.218
														322449	5.37415		2.21402		6.69767		8.53414		14.9495		19.0751		20.217		31.3418		38.01		46.1268				281219	4.68698		5.73477		7.63854		17.1276		17.3465		23.9826
														324777	5.41295		4.8893		8.37209		11.1446		12.5252		18.7861		23.4714		37.3164		40.6965		46.5962				283071	4.71785		5.28674		11.2831		13.4255		16.4019		24.564
														327108	5.4518		5.16605		11.6279		9.53815		13.2323		20.0385		21.8935		34.3781		38.806		48.0047				284924	4.74873		2.37455		8.03794		16.5477		16.2301		25.6541
														329449	5.49082		5.16605		9.2093		9.53815		15.5556		20.7129		20.217		34.6719		39.801		46.9484				286770	4.7795		3.49462		9.98502		17.1722		16.5307		24.1279
														331787	5.52978		5.2583		6.60465		8.23293		13.5353		18.4008		19.9211		34.0842		40.6965		46.1268				288626	4.81043		4.7491		9.5357		14.8974		17.8617		25.0727
														334121	5.56868		3.41328		8.18605		8.93574		13.4343		19.1715		27.0217		34.5739		42.0896		48.3568				290483	4.84138		2.64337		9.28607		14.0946		17.3036		24.8547
														336465	5.60775		3.87454		10.0465		11.5462		12.5252		21.4836		25.2465		36.4349		40.995		46.3615				292345	4.87242		3.27061		11.2331		18.1534		17.9905		25.5087
														338797	5.64662		4.33579		9.30233		8.53414		15.0505		18.3044		25.5424		35.5534		41.4925		46.5962				294201	4.90335		7.48208		9.08637		15.2988		16.1443		25.0727
														341142	5.6857		3.87454		8.65116		10.9438		12.6263		17.9191		23.6686		36.3369		40.995		46.1268				296067	4.93445		3.53943		10.5342		15.8787		19.064		26.2355
														343469	5.72448		6.54982		5.48837		9.63855		14.8485		21.2909		24.5562		35.4554		39.801		48.5915				297915	4.96525		3.80824		7.58862		16.4585		15.4143		23.8372
														345814	5.76357		3.96679		5.30233		9.23695		16.0606		20.8093		21.6963		34.3781		40		48.3568				299765	4.99608		5.73477		11.8323		16.4139		17.6041		23.4012
														348142	5.80237		5.62731		9.5814		9.33735		13.9394		21.9653		21.7949		36.8266		43.2836		48.1221				301621	5.02702		6.94444		8.73689		17.5736		19.5792		27.0349
														350485	5.84142		2.85978		8.37209		7.83133		13.9394		21.0019		23.57		37.8061		40.796		50.5868				303476	5.05793		6.67563		8.38742		15.7449		16.2301		26.6715
														352829	5.88048		4.79705		12.4651		7.63052		12.7273		20.4239		21.499		36.4349		40.796		49.1784				305322	5.0887		5.77957		12.7309		15.2096		16.1013		24.0552
														355173	5.91955		7.28782		12.3721		8.53414		15.7576		19.8459		24.4576		38.5896		42.8856		47.77				307178	5.11963		5.06272		12.3315		16.8153		17.4753		27.5436
														357486	5.9581		5.99631		5.95349		9.13655		15.3535		20.6166		24.0631		37.6102		42.9851		49.061				309023	5.15038		4.7043		11.4329		18.6887		16.4019		25.1453
														359824	5.99707		4.79705		6.32558		8.43373		13.2323		18.4971		20.8087		35.7493		40.398		46.7136				310876	5.18127		5.15233		8.83674		17.529		17.6471		26.4535
														362161	6.03602		3.50554		8.74419		9.33735		14.1414		21.9653		23.8659		39.3732		42.4876		49.1784				312731	5.21218		4.6595		13.0305		17.975		16.6595		27.5436
														364501	6.07502		4.7048		9.86047		10.8434		15.2525		21.58		21.0059		39.1773		42.4876		49.5305				314583	5.24305		6.04839		10.1847		17.2614		19.9656		26.3808
														366835	6.11392		3.69004		9.67442		9.53815		13.1313		18.7861		23.1755		36.141		41.8905		47.77				316430	5.27383		5.77957		9.28607		14.8082		20.5668		27.8343
														369188	6.15313		7.65683		10.5116		7.53012		16.5657		23.5067		22.8797		40.2546		43.2836		52.23				318286	5.30477		5.42115		13.2301		15.8341		19.1069		26.9622
														371509	6.19182		3.22878		10.8837		9.73896		17.1717		20.0385		20.217		36.4349		45.8706		50.4695				320134	5.33557		3.53943		10.3844		16.9046		18.6775		24.3459
														373847	6.23078		8.11808		10.9767		11.245		13.0303		20.2312		23.4714		37.4143		42.1891		48.9437				321985	5.36642		5.37634		10.9835		15.3434		18.5917		28.125
														376188	6.2698		5.16605		8		9.23695		17.6768		21.4836		26.7258		38.2958		44.6766		52.3474				323834	5.39723		5.15233		10.5841		17.1276		20.9103		25.7994
														378516	6.3086		4.15129		10.1395		11.9478		16.1616		22.447		25.9369		41.2341		44.7761		49.8826				325686	5.4281		6.1828		11.0834		16.8153		18.4199		26.0174
														380844	6.3474		5.35055		12.186		8.83534		12.7273		19.8459		24.5562		38.4917		43.9801		51.5258				327543	5.45905		4.16667		9.08637		18.0196		18.7205		26.9622
														383175	6.38625		6.82657		9.48837		10.3414		16.8687		21.6763		26.1341		39.3732		46.5672		51.8779				329406	5.4901		6.72043		13.33		19.1793		20.2233		28.9244
														385512	6.4252		8.21033		10.3256		11.245		16.4647		18.4008		23.9645		37.6102		45.4726		49.7653				331243	5.52072		5.73477		10.9336		15.4772		18.5058		26.9622
														387853	6.46422		5.4428		11.0698		10.8434		14.8485		20.6166		25.8383		36.7287		44.0796		50.5868				333103	5.55172		4.6147		12.3315		18.0642		18.9352		28.8517
														390185	6.50308		3.59779		7.25581		10.8434		14.2424		25.0482		25.9369		41.43		48.0597		51.7606				334959	5.58265		3.71864		9.98502		16.3693		18.5917		27.907
														392521	6.54202		3.69004		10.7907		10.1406		14.5455		24.1811		24.1617		40.3526		44.5771		51.9953				336825	5.61375		6.1828		9.48577		13.9608		18.6346		25.0727
														394853	6.58088		6.18081		10.5116		8.43373		15.2525		22.6397		23.9645		38.5896		45.0746		50.4695				338663	5.64438		6.85484		11.4329		16.5031		19.6651		26.8169
														397191	6.61985		5.62731		6.97674		11.747		15.2525		19.9422		24.0631		39.3732		42.4876		50.1174				340515	5.67525		5.15233		11.1832		18.1088		19.5363		25.9448
														399525	6.65875		6.18081		10.5116		11.245		15.2525		20.4239		26.1341		38.2958		44.9751		52.23				342365	5.70608		8.51254		12.2816		17.4844		17.7329		26.2355
														401863	6.69772		5.99631		10.2326		9.33735		14.9495		20.4239		24.7535		39.2752		44.3781		51.8779				344217	5.73695		7.30287		11.3829		18.0642		18.7634		28.8517
														404205	6.73675		7.19557		8.09302		11.9478		15.2525		23.025		26.0355		40.3526		44.9751		52.6995				346072	5.76787		4.97312		11.1832		16.1909		19.5363		27.5436
														406539	6.77565		8.94834		9.76744		7.93173		19.899		20.1349		25.2465		38.9814		46.9652		50.2347				347920	5.79867		8.15412		9.03645		15.9233		18.0335		27.3256
														408877	6.81462		5.2583		10.5116		12.4498		14.3434		23.6994		23.6686		39.4711		46.3682		52.1127				349772	5.82953		6.2276		10.8337		18.3319		19.1499		26.3808
														411235	6.85392		6.91882		11.5349		10.241		18.9899		24.4701		26.2327		38.4917		47.7612		52.5822				351632	5.86053		5.33154		11.5327		17.8858		19.3645		26.8169
														413547	6.89245		6.73432		9.67442		10.8434		17.1717		20.0385		25.7396		40.5485		47.7612		52.3474				353485	5.89142		6.1828		10.8837		17.6628		19.6222		26.0174
														415880	6.93133		3.41328		7.72093		9.53815		17.3737		21.9653		27.2189		39.2752		45.9701		52.1127				355341	5.92235		6.81004		13.979		16.7261		17.3894		28.4884
														418219	6.97032		5.71956		9.67442		10.9438		16.7677		23.4104		27.0217		40.5485		46.4677		52.3474				357193	5.95322		7.30287		12.3814		17.1276		20.1374		28.1977
														420551	7.00918		6.08856		8.55814		10.0402		16.4647		22.158		26.6272		40.8423		45.0746		52.4648				359056	5.98427		7.57168		11.1333		16.3693		17.1748		27.3256
														422877	7.04795		6.82657		6.4186		9.33735		16.9697		20.5202		27.5148		41.5279		45.8706		53.9906				360906	6.0151		7.21326		11.6825		17.9304		19.3645		28.2703
														425245	7.08742		5.0738		11.4419		11.3454		16.6667		22.5434		30.0789		42.8991		45.1741		52.9343				362762	6.04603		5.51075		11.5826		17.4398		17.5612		27.689
														427558	7.12597		6.18081		9.11628		11.8474		16.3636		24.2775		27.0217		39.569		45.8706		52.8169				364617	6.07695		5.91398		11.7324		18.198		18.2911		29.0698
														429901	7.16502		7.84133		10.2326		12.8514		16.3636		22.447		26.1341		38.8835		47.3632		52.6995				366475	6.10792		9.319		13.6296		19.4023		19.6222		27.6163
														432229	7.20382		5.71956		14.7907		11.747		15.9596		22.0617		24.0631		39.8629		47.1642		55.9859				368327	6.13878		5.68996		13.2801		18.3319		17.4324		26.6715
														434573	7.24288		6.64207		10.9767		11.747		15.2525		20.2312		25.641		39.8629		46.8657		53.2864				370183	6.16972		6.85484		12.2317		21.3203		19.3216		27.1076
														436917	7.28195		5.4428		10.8837		8.63454		14.5455		25.2408		28.1065		42.8991		46.0697		50.939				372040	6.20067		6.98925		11.982		18.0196		19.751		28.6337
														439244	7.32073		3.50554		9.5814		11.9478		14.9495		22.2543		28.7968		40.6464		46.1692		52.8169				373899	6.23165		7.61649		11.8323		19.8483		17.8188		30.2326
														441713	7.36188		3.59779		8.27907		11.3454		18.0808		22.9287		27.4162		42.4094		46.7662		55.7512				375745	6.26242		8.06452		11.2331		17.7966		19.064		29.7965
														444061	7.40102		5.0738		10.6977		12.3494		15.9596		23.4104		26.8245		41.43		46.4677		54.8122				377599	6.29332		8.10932		11.7823		18.6887		19.2357		26.7442
														446400	7.44		5.16605		9.48837		11.0442		16.3636		22.2543		26.0355		41.1361		45.6716		53.169				379460	6.32433		7.34767		12.9805		20.0714		22.0696		28.4884
														448743	7.47905		8.21033		11.2558		11.4458		17.1717		25.7225		26.8245		43.3888		47.8607		54.6948				381321	6.35535		7.30287		11.5826		19.8037		19.4933		28.4157
														451072	7.51787		6.36531		10.7907		9.23695		15.9596		24.3738		26.6272		41.0382		46.7662		54.5775				383173	6.38622		6.2276		13.7793		18.4657		21.5543		27.0349
														453448	7.55747		6.27306		11.814		13.3534		17.1717		27.6493		26.6272		41.7238		48.5572		54.8122				385027	6.41712		5.91398		10.3345		18.4657		19.751		29.2151
														455776	7.59627		5.16605		9.2093		9.23695		17.3737		22.6397		28.6982		40.6464		47.7612		52.5822				386880	6.448		8.69176		12.8807		17.752		21.0391		29.5785
														458120	7.63533		5.62731		13.3023		11.4458		17.0707		25.6262		27.8106		41.0382		47.3632		54.4601				388734	6.4789		7.66129		14.029		16.9938		19.5792		26.8895
														460447	7.67412		5.2583		10.8837		10.9438		16.2626		26.3969		26.9231		42.7032		48.8557		55.3991				390584	6.50973		6.1828		13.6296		21.4541		21.9407		28.4157
														462791	7.71318		3.59779		11.814		12.5502		17.3737		21.6763		27.0217		42.3115		48.5572		54.108				392437	6.54062		5.28674		12.0819		19.0455		19.8368		28.4884
														465119	7.75198		7.19557		10.5116		11.3454		18.3838		22.447		26.9231		42.1156		49.3532		54.108				394283	6.57138		8.10932		12.0819		19.8929		21.8549		28.561
														467447	7.79078		6.18081		12.3721		11.245		17.9798		25.8189		28.4024		41.2341		49.2537		54.9296				396148	6.60247		5.01792		12.3814		18.6887		20.3092		29.9419
														469774	7.82957		4.79705		12.4651		10.0402		17.6768		23.6031		28.8955		41.6259		46.8657		53.7559				397999	6.63332		8.73656		14.1288		20.562		22.6707		27.689
														472112	7.86853		5.2583		12.5581		12.5502		16.6667		22.736		28.2051		42.8991		47.0647		54.6948				399855	6.66425		5.91398		9.38592		18.9563		20.6956		29.1424
														474447	7.90745		6.36531		12.9302		11.747		16.2626		27.4566		28.4024		42.7032		50.4478		55.6338				401707	6.69512		8.60215		10.9835		19.6699		18.377		28.4884
														476781	7.94635		6.73432		13.4884		10.4418		15.2525		24.3738		27.8106		42.5074		48.0597		56.5728				403570	6.72617		7.8853		12.4813		21.4541		22.1554		31.25
														479110	7.98517		8.76384		13.9535		10.3414		17.0707		21.7726		25.8383		43.2909		48.5572		53.6385				405429	6.75715		7.8853		11.4329		18.6441		21.082		30.0872
														481452	8.0242		7.38007		10.3256		13.5542		17.8788		22.5434		27.3175		44.4662		48.4577		56.4554				407279	6.78798		5.28674		13.3799		17.306		19.9227		28.561
														483791	8.06318		6.82657		10.1395		12.4498		17.7778		25.1445		31.854		44.5641		49.1542		56.1033				409129	6.81882		6.36201		14.029		19.1347		20.1803		29.8692
														486118	8.10197		4.98155		11.2558		11.8474		19.0909		26.5896		28.0079		43.8785		51.3433		55.1643				410991	6.84985		5.91398		12.2816		19.8929		22.6277		28.2703
														488446	8.14077		4.79705		11.7209		9.43775		19.798		23.9884		30.1775		43.8785		49.8507		57.5117				412845	6.88075		8.51254		11.1832		21.6771		21.9407		27.7616
														490787	8.17978		5.53506		13.3953		12.8514		16.2626		24.6628		30.0789		43.8785		50.5473		55.5164				414710	6.91183		6.89964		13.8293		18.198		19.5792		29.2151
														493134	8.2189		6.54982		12.6512		11.0442		16.9697		26.4933		28.8955		42.4094		50.3483		55.2817				416551	6.94252		7.12366		11.982		18.5549		20.0945		28.561
														495460	8.25767		9.5941		11.4419		9.43775		17.6768		24.3738		26.7258		42.2135		48.7562		54.5775				418413	6.97355		5.95878		12.3315		17.7966		22.3272		29.7238
														497806	8.29677		7.56458		14.2326		13.9558		18.7879		24.0848		27.9093		42.9971		51.6418		58.0986				420271	7.00452		7.25806		13.6296		20.6066		20.5238		29.1424
														500134	8.33557		5.99631		8.74419		12.8514		17.0707		23.9884		28.4024		43.095		49.3532		55.1643				422132	7.03553		6.67563		12.2816		21.1864		20.0945		30.2326
														502463	8.37438		6.45756		8.37209		14.3574		18.8889		26.6859		27.712		42.6053		49.6517		56.5728				423985	7.06642		9.99104		14.5282		18.6441		20.7815		30.1599
														504805	8.41342		4.42804		13.3953		13.3534		16.5657		26.1079		27.1203		42.7032		49.8507		53.9906				425840	7.09733		8.91577		13.1303		21.3203		20.2662		30.3052
														507119	8.45198		6.27306		14.2326		11.5462		17.2727		28.42		28.1065		42.8991		49.8507		54.5775				427702	7.12837		5.10753		12.0819		19.4915		21.4684		27.4709
														509449	8.49082		4.8893		12.5581		10.9438		20		24.9518		29.783		42.5074		49.1542		55.6338				429557	7.15928		6.81004		14.1288		19.4915		21.4255		30.9593
														511790	8.52983		9.7786		13.9535		13.6546		19.3939		26.975		28.6982		45.5436		51.6418		54.6948				431404	7.19007		7.43728		12.2816		21.2756		22.6277		27.8343
														514126	8.56877		6.64207		10.8837		12.4498		18.6869		28.2274		29.8817		46.621		54.9254		56.1033				433273	7.22122		6.40681		11.7324		21.6325		20.6956		29.8692
														516456	8.6076		9.04059		9.39535		11.6466		21.8182		26.3006		30.4734		43.6827		50.5473		54.4601				435116	7.25193		7.97491		13.4299		19.3577		21.6402		28.4884
														518798	8.64663		8.57934		13.4884		11.6466		18.8889		27.4566		30.1775		43.7806		48.9552		55.8685				436957	7.28262		6.45161		12.6311		19.4915		20.6956		29.2878
														521134	8.68557		9.13284		14.6047		13.0522		18.6869		25.8189		29.8817		43.8785		50.9453		57.277				438809	7.31348		6.09319		14.9276		20.785		22.4989		29.0698
														523473	8.72455		5.62731		13.6744		14.8594		20		25.9152		29.1913		43.9765		49.3532		56.1033				440663	7.34438		8.01971		15.5766		22.2123		20.8244		30.3052
														525807	8.76345		5.99631		13.7674		11.245		19.596		27.842		29.0927		43.5847		50.7463		58.216				442507	7.37512		9.13978		10.2846		19.8037		22.3272		29.4331
														528143	8.80238		5.16605		10.9767		9.43775		20		26.1079		31.2623		45.1518		51.5423		55.7512				444363	7.40605		6.13799		13.4798		17.8858		18.5487		28.0523
														530484	8.8414		7.65683		10.9767		10.8434		21.2121		24.5665		29.4872		44.9559		50.6468		56.2207				446215	7.43692		8.15412		10.684		18.6441		20.3092		30.0145
														532812	8.8802		8.21033		12		14.0562		16.1616		27.3603		30.8679		44.5641		49.1542		56.6901				448071	7.46785		9.58781		12.5811		19.4915		19.6651		28.125
														535149	8.91915		11.5314		10.6977		12.8514		19.798		24.4701		29.3886		43.6827		51.5423		56.1033				449922	7.4987		9.58781		13.0804		20.562		21.5114		30.1599
														537488	8.95813		9.31734		10.2326		12.249		21.0101		24.5665		31.2623		45.4456		51.4428		56.8075				451779	7.52965		7.7509		13.1802		21.4541		21.5114		29.2878
														539827	8.99712		8.21033		9.95349		12.5502		16.6667		26.4933		28.2051		44.858		50.4478		57.1596				453630	7.5605		6.04839		14.6281		22.1677		20.5238		29.6512
														542171	9.03618		4.42804		10.9767		14.5582		18.5859		29.4798		30.6706		44.9559		50.2488		57.8638				455475	7.59125		9.05018		13.6296		20.0268		22.1984		31.3227
														544488	9.0748		8.39483		11.5349		14.257		16.8687		24.4701		30.0789		45.4456		50.5473		55.8685				457329	7.62215		8.96057		14.0789		20.1606		21.769		27.689
														546825	9.11375		8.57934		8.55814		9.83936		19.798		27.1676		32.8402		45.1518		50.6468		57.7465				459196	7.65327		9.09498		14.0789		21.0526		20.7815		28.4884
														549164	9.15273		10.5166		9.76744		11.245		17.5758		25.3372		30.2761		45.5436		52.7363		58.216				461044	7.68407		7.97491		14.2287		19.8483		21.6831		30.9593
														551501	9.19168		8.02583		12.9302		10.4418		16.1616		22.9287		31.0651		44.1724		49.0547		55.9859				462899	7.71498		7.93011		14.8278		19.0901		20.2233		31.3227
														553843	9.23072		8.02583		12.6512		15.9639		18.8889		25.6262		30.7692		45.4456		51.7413		55.7512				464751	7.74585		6.98925		13.6296		20.339		20.8673		29.9419
														556176	9.2696		7.19557		13.8605		17.6707		22.0202		27.3603		30.572		47.6004		51.7413		55.5164				466610	7.77683		8.96057		15.976		22.4799		21.6402		31.1047
														558507	9.30845		7.65683		13.6744		14.6586		17.6768		24.5665		27.2189		44.2703		50.5473		55.1643				468460	7.80767		8.60215		14.7778		20.9634		21.6402		28.9244
														560853	9.34755		5.16605		10.0465		12.3494		19.899		27.7457		29.3886		46.4251		53.0348		58.8028				470312	7.83853		6.2724		13.0305		21.7217		21.9837		30.5233
														563184	9.3864		7.19557		14.2326		9.63855		17.6768		27.842		30.572		44.1724		51.8408		56.9249				472161	7.86935		7.03405		13.979		19.5361		20.6097		30.6686
														565529	9.42548		5.4428		13.1163		12.6506		20.101		27.4566		30.4734		45.1518		53.7313		57.5117				474016	7.90027		6.36201		13.6795		21.9001		21.5543		32.6308
														567858	9.4643		6.82657		9.67442		13.4538		16.5657		23.8921		28.5996		46.7189		51.7413		57.6291				475870	7.93117		7.57168		11.7324		19.3577		22.0266		29.7238
														570202	9.50337		5.90406		14.2326		12.9518		17.1717		28.0347		31.6568		45.3477		52.7363		55.5164				477729	7.96215		7.30287		13.6296		20.8296		22.7995		30.0145
														572523	9.54205		7.38007		12.5581		10.9438		18.8889		26.1079		32.0513		47.4045		51.1443		55.8685				479576	7.99293		7.48208		15.5766		21.6325		21.2967		29.5058
														574862	9.58103		9.31734		14.0465		11.0442		19.0909		29.3834		32.4458		44.0744		51.3433		57.3944				481427	8.02378		9.90143		13.1303		21.6325		23.1		29.5058
														577195	9.61992		8.11808		13.3953		11.747		18.3838		27.1676		31.2623		44.76		54.0299		56.2207				483289	8.05482		8.96057		12.6311		20.0714		21.6402		29.7965
														579534	9.6589		7.74908		17.1163		13.253		18.9899		28.6127		30.4734		46.523		53.4328		57.0423				485145	8.08575		9.54301		15.9261		21.231		23.3577		29.9419
														581874	9.6979		7.74908		16.186		17.2691		20.404		28.2274		31.361		45.9354		52.5373		57.9812				486992	8.11653		10.4839		13.5796		20.1606		20.1803		32.6308
														584205	9.73675		5.62731		15.6279		16.6667		20.303		27.7457		28.9941		47.9922		52.6368		59.3897				488847	8.14745		9.00538		13.8293		21.5433		21.0391		32.0494
														586540	9.77567		5.0738		14.6977		15.4618		19.798		27.4566		30.572		46.2292		55.1244		59.1549				490701	8.17835		7.93011		14.1787		19.7145		21.6402		30.7413
														588882	9.8147		7.28782		13.0233		14.0562		19.596		29.1907		31.7554		46.2292		54.3284		56.4554				492562	8.20937		6.54122		13.2301		20.4282		22.6707		30.5959
														591210	9.8535		4.7048		12.5581		13.1526		18.5859		26.4933		30.8679		47.1107		53.7313		55.8685				494411	8.24018		9.4086		13.8293		21.9893		21.8978		32.2674
														593566	9.89277		8.85609		12.6512		11.9478		20.7071		27.0713		32.1499		46.4251		53.0348		56.338				496264	8.27107		10.3495		13.2801		21.8109		24.3881		30.4506
														595881	9.93135		8.39483		14.6977		11.9478		19.2929		25.4335		31.1637		46.2292		53.1343		58.6855				498128	8.30213		6.40681		13.6296		22.0339		22.6277		31.6134
														598222	9.97037		8.94834		15.814		13.6546		20.101		29.2871		28.3037		47.2086		52.3383		57.7465				499970	8.33283		12.0072		15.6266		20.8742		22.5419		31.3953
														600566	10.0094		6.36531		13.3953		12.3494		19.1919		31.5992		30.1775		46.8169		53.3333		58.6855				501847	8.36412		8.24373		13.4798		21.3649		22.6277		30.2326
														602896	10.0483		8.85609		15.0698		13.4538		17.7778		27.264		29.9803		47.2086		53.5323		56.2207				503707	8.39512		8.91577		13.33		21.3203		22.413		32.0494
														605230	10.0872		8.11808		15.6279		18.8755		18.3838		28.2274		28.8955		46.621		52.1393		58.4507				505559	8.42598		11.5591		15.2272		21.2756		23.4865		31.7587
														607566	10.1261		8.11808		13.2093		12.9518		22.1212		27.553		31.9527		47.2086		53.9303		57.6291				507422	8.45703		9.45341		15.1273		21.0526		24.3452		29.6512
														609894	10.1649		7.28782		13.9535		13.4538		19.2929		30.6358		32.0513		46.4251		54.0299		58.0986				509275	8.48792		13.2617		13.6296		19.4469		21.5114		31.1773
														612253	10.2042		5.81181		16.4651		12.5502		21.2121		27.842		33.1361		47.7963		55.7214		58.0986				511142	8.51903		6.1828		13.2301		20.8296		24.0447		33.1395
														614581	10.243		10.3321		11.6279		15.261		21.6162		27.6493		32.9389		46.523		53.8308		58.4507				512993	8.54988		8.42294		14.4783		23.2382		24.7746		31.8314
														616911	10.2819		9.22509		18.3256		12.5502		18.9899		29.0944		28.4024		46.4251		54.5274		58.216				514845	8.58075		8.78136		16.6251		23.595		22.3272		32.1948
														619252	10.3209		7.28782		15.814		14.4578		21.2121		24.6628		32.8402		47.2086		53.0348		57.9812				516695	8.61158		10.3047		15.5766		21.3203		22.9712		30.3052
														621589	10.3598		9.22509		15.4419		13.8554		19.798		28.5164		30.6706		46.8169		53.5323		58.4507				518554	8.64257		8.82616		15.2272		19.1347		23.3147		32.0494
														623917	10.3986		9.9631		12.2791		15.5623		21.6162		29.0944		30.8679		47.8942		53.8308		57.1596				520402	8.67337		9.22939		14.6281		22.0785		24.6887		31.9767
														626266	10.4378		9.7786		13.4884		16.7671		18.5859		30.4432		32.5444		47.8942		54.2289		56.2207				522266	8.70443		8.06452		13.1303		22.2123		22.9712		32.1221
														628598	10.4766		5.4428		10.6047		18.1727		20.101		28.0347		31.4596		47.1107		55.3234		57.7465				524119	8.73532		7.25806		15.7264		22.7476		23.5724		32.3401
														630934	10.5156		7.01107		13.0233		14.9598		17.7778		32.1773		34.5168		46.9148		52.9353		57.3944				525970	8.76617		8.28853		13.6296		24.4871		21.7261		32.9942
														633270	10.5545		3.96679		16.7442		14.0562		19.0909		25.9152		32.9389		46.7189		53.2338		57.9812				527831	8.79718		10.0358		15.6765		21.8109		23.143		30.6686
														635612	10.5935		7.47232		13.2093		14.6586		21.6162		27.1676		29.4872		48.286		53.7313		58.216				529692	8.8282		10.3047		15.4768		23.7734		22.7995		33.6483
														637938	10.6323		7.47232		15.0698		13.4538		20.101		27.1676		32.643		46.9148		53.5323		58.6855				531542	8.85903		9.58781		14.2287		22.7476		25.4616		31.5407
														640273	10.6712		6.18081		16.9302		11.245		19.697		28.2274		32.0513		46.4251		53.6318		59.1549				533394	8.8899		8.78136		15.3769		24.7993		22.8424		31.25
														642604	10.7101		10.1476		12.5581		16.0643		21.1111		28.6127		33.3333		49.6572		54.9254		59.9765				535251	8.92085		8.96057		14.4284		23.5504		23.4865		33.3576
														644956	10.7493		5.53506		14.8837		14.5582		19.3939		27.9383		32.5444		51.0284		55.7214		59.9765				537108	8.9518		8.64695		15.4269		23.2828		21.769		33.3576
														647284	10.7881		7.84133		14.2326		13.4538		21.3131		28.131		30.572		47.4045		53.9303		58.3333				538955	8.98258		9.94624		14.6281		23.9518		22.7136		31.468
														649609	10.8268		7.28782		13.2093		15.8635		21.0101		28.8054		31.9527		47.0127		56.3184		58.9202				540817	9.01362		9.94624		17.0245		21.5433		22.4989		33.5756
														651938	10.8656		3.50984		16.1356		24.5424		26.2844		28.1921		45.3827		46.707		60.8586		64.0652				542666	9.04443		8.78136		14.2786		22.4799		24.8175		31.5407
[truncated: 88 more columns]

## Sheet: Figure 1g
[Eu.L1+] Data for HCO-3 Transport Figure 1G																											[Eu.L1+] Data for HCO-3 Transport Figure 1G
SLC26A6 Liposomes Symmetrical Data				(200mM NaCl Inside Liposomes)/(50mM NaCl Outside Liposomes)																							SLC26A6 Liposomes Gradient Data				(200mM NaCl Inside Liposomes)/(50mM NaCl Outside Liposomes)
Raw Data						Baseline-corrected values (Corrected to the mean of first 20 values prior to HCO-3 addition									Normalised to Lysis After 300 cycles						Mean	SEM		Time [s]			Raw Data					Baseline-corrected values (Corrected to the mean of first 20 values prior to HCO-3 addition									Normalised to Lysis After 300 cycles					Mean	SEM		Time [s]
1870	1634	1802	1466	1345		62.7	3.55	81.6	-79.65	51.65					5.31185	3.15243	6.14384	2.43243	10.9971		5.60752	1.50882		0			3144	3141	1156	1355		52.85	69.45	-70.25	-28.25						3.87907	5.17835	0	2.17839		2.80895	1.11978		0
1819	1618	1715	1663	1284		11.7	-12.45	-5.4	117.35	-9.35					3.78991	2.51397	2.99964	15.7432	6.52493		6.31434	2.45715		1.23036			3062	3137	1173	1281		-29.15	65.45	-53.25	-102.25						2.38572	5.10592	1.20397	0		2.1739	1.09195		1.23036
1859	1638	1654	1511	1303		51.7	7.55	-66.4	-34.65	9.65					4.98359	3.31205	0.795085	5.47297	7.91789		4.49632	1.18322		2.458			3163	3023	1191	1424		71.85	-48.55	-35.25	40.75						4.2251	3.04182	2.47875	4.2096		3.48882	0.436049		2.458
1868	1637	1809	1476	1359		60.7	6.55	88.6	-69.65	65.65					5.25216	3.27215	6.39682	3.10811	12.0235		6.01054	1.62485		3.68043			3077	3244	1227	1432		-14.15	172.45	0.75	48.75						2.6589	7.04327	5.02833	4.4451		4.7939	0.903445		3.68043
1853	1595	1763	1524	1195		45.7	-35.45	42.6	-21.65	-98.35					4.80454	1.59617	4.73437	6.35135	0		3.49729	1.16684		4.9065			2940	3089	1281	1335		-151.15	17.45	54.75	-48.25						0.163905	4.23683	8.85269	1.58964		3.71077	1.9104		4.9065
1846	1608	1762	1515	1246		38.7	-22.45	41.6	-30.65	-47.35					4.59564	2.11492	4.69823	5.74324	3.739		4.17821	0.605972		6.13207			3072	3118	1196	1349		-19.15	46.45	-30.25	-34.25						2.56784	4.7619	2.83286	2.00177		3.04109	0.599217		6.13207
1741	1689	1726	1533	1291		-66.3	58.55	5.6	-12.65	-2.35					1.46225	5.34717	3.39718	6.95946	7.03812		4.84084	1.07406		7.3585			3157	2886	1219	1424		65.85	-185.55	-7.25	40.75						4.11583	0.561289	4.46176	4.2096		3.33712	0.928154		7.3585
1824	1720	1656	1572	1357		16.7	89.55	-64.4	26.35	63.65					3.93912	6.5842	0.867365	9.59459	11.8768		6.57242	1.95898		8.581			3090	2917	1233	1380		-1.15	-154.55	6.75	-3.25						2.89565	1.12258	5.45326	2.91434		3.09645	0.890889		8.581
1703	1555	1724	1573	1337		-104.3	-75.45	3.6	27.35	43.65					0.32826	0	3.3249	9.66216	10.4106		4.74518	2.2396		9.80971			3203	2855	1301	1377		111.85	-216.55	74.75	-6.25						4.95356	0	10.2691	2.82602		4.51218	2.17064		9.80971
1744	1561	1736	1597	1238		-63.3	-69.45	15.6	51.35	-55.35					1.55178	0.239425	3.75858	11.2838	3.15249		3.99721	1.92309		11.0307			3138	3128	1268	1349		46.85	56.45	41.75	-34.25						3.7698	4.94297	7.93201	2.00177		4.66164	1.24649		11.0307
1816	1613	1655	1529	1307		8.7	-17.45	-65.4	-16.65	13.65					3.70039	2.31445	0.831225	6.68919	8.21114		4.34928	1.36615		12.2552			2931	3122	1203	1400		-160.15	50.45	-23.25	16.75						0	4.83433	3.32861	3.50309		2.91651	1.02867		12.2552
1782	1665	1650	1517	1286		-25.3	34.55	-70.4	-28.65	-7.35					2.68577	4.38947	0.650524	5.87838	6.67155		4.05514	1.08968		13.4796			3008	3139	1195	1363		-83.15	67.45	-31.25	-20.25						1.4023	5.14213	2.76204	2.4139		2.93009	0.791728		13.4796
1860	1689	1707	1522	1337		52.7	58.55	-13.4	-23.65	43.65					5.01343	5.34717	2.71052	6.21622	10.4106		5.93958	1.259		14.7092			3078	3024	1329	1364		-13.15	-47.55	102.75	-19.25						2.67711	3.05993	12.2521	2.44333		5.10812	2.38472		14.7092
1768	1622	1632	1558	1260		-39.3	-8.45	-88.4	12.35	-33.35					2.26798	2.67358	0	8.64865	4.7654		3.67112	1.45627		15.9302			3147	3164	1248	1402		55.85	92.45	21.75	18.75						3.93371	5.59478	6.51558	3.56197		4.90151	0.696232		15.9302
1746	1613	1884	1577	1265		-61.3	-17.45	163.6	31.35	-28.35					1.61146	2.31445	9.10734	9.93243	5.13196		5.61953	1.70282		17.1583			3153	2965	1246	1487		61.85	-106.55	19.75	103.75						4.04298	1.99167	6.37394	6.06417		4.61819	1.01665		17.1583
1882	1634	1705	1543	1294		74.7	3.55	-15.4	-2.65	0.65					5.66995	3.15243	2.63824	7.63514	7.25806		5.27076	1.02753		18.3797			3090	3086	1220	1414		-1.15	14.45	-6.25	30.75						2.89565	4.18251	4.53258	3.91522		3.88149	0.352083		18.3797
1761	1646	1709	1600	1280		-46.3	15.55	-11.4	54.35	-13.35					2.05909	3.63128	2.7828	11.4865	6.23167		5.23827	1.71386		19.6049			3038	3222	1206	1375		-53.15	150.45	-20.25	-8.25						1.94864	6.64494	3.54108	2.76715		3.72545	1.02603		19.6049
1746	1612	1697	1555	1292		-61.3	-18.45	-23.4	9.35	-1.35					1.61146	2.27454	2.34911	8.44595	7.11144		4.3585	1.41797		20.8279			3119	3059	1240	1378		27.85	-12.55	13.75	-5.25						3.42378	3.69365	5.94901	2.85546		3.98047	0.679028		20.8279
1847	1612	1680	1573	1283		39.7	-18.45	-40.4	27.35	-10.35					4.62548	2.27454	1.73473	9.66216	6.45161		4.94971	1.45018		22.0543			3085	3125	1232	1394		-6.15	53.45	5.75	10.75						2.80459	4.88865	5.38244	3.32646		4.10053	0.615295		22.0543
1811	1648	1742	1509	1308		3.7	17.55	21.6	-36.65	14.65					3.55118	3.71109	3.97542	5.33784	8.28446		4.972	0.886228		23.2751			3128	2987	1161	1382		36.85	-84.55	-65.25	-1.25						3.58769	2.39	0.354108	2.97321		2.32625	0.701379		23.2751
1695	1656	1668	1430	1284		-112.3	25.55	-52.4	-115.65	-9.35					0.0895255	4.03033	1.30105	0	6.52493		2.38917	1.26448		48.2147			3321	3152	1210	1669		229.85	80.45	-16.25	285.75						7.10253	5.37751	3.82436	11.4218		6.93156	1.63965		48.2147
1692	1762	1761	1488	1297		-115.3	131.55	40.6	-57.65	3.65					0	8.26018	4.66209	3.91892	7.47801		4.86384	1.4656		49.4366			3250	3257	1250	1630		158.85	185.45	23.75	246.75						5.80951	7.27865	6.65722	10.2738		7.50479	0.970856		49.4366
1787	1727	1721	1493	1238		-20.3	96.55	0.6	-52.65	-55.35					2.83497	6.86353	3.21648	4.25676	3.15249		4.06485	0.739397		50.6624			3274	3185	1235	1729		182.85	113.45	8.75	345.75						6.24658	5.97501	5.5949	13.1881		7.75115	1.81724		50.6624
1866	1782	1822	1443	1249		58.7	151.55	101.6	-102.65	-44.35					5.19248	9.05826	6.86664	0.878378	3.95894		5.19094	1.37623		51.8838			3230	3203	1171	1662		138.85	131.45	-55.25	278.75						5.44527	6.30092	1.06232	11.2158		6.00608	2.08133		51.8838
1821	1828	1682	1501	1248		13.7	197.55	-38.4	-44.65	-45.35					3.8496	10.8939	1.80701	4.7973	3.88563		5.04668	1.54156		53.1111			3147	3142	1210	1682		55.85	70.45	-16.25	298.75						3.93371	5.19645	3.82436	11.8045		6.18976	1.8973		53.1111
1818	1735	1713	1501	1418		10.7	104.55	-7.4	-44.65	124.65					3.76007	7.18276	2.92736	4.7973	16.349		7.00329	2.44307		54.3341			3170	3175	1237	1596		78.85	103.45	10.75	212.75						4.35258	5.79395	5.73654	9.27289		6.28899	1.04895		54.3341
1904	1722	1818	1502	1301		96.7	91.55	97.6	-43.65	7.65					6.32647	6.66401	6.72208	4.86486	7.77126		6.46974	0.46859		55.5625			3057	3380	1167	1708		-34.15	308.45	-59.25	324.75						2.29466	9.5057	0.779037	12.5699		6.28733	2.83007		55.5625
1794	1794	1707	1458	1300		-13.3	163.55	-13.4	-87.65	6.65					3.04387	9.53711	2.71052	1.89189	7.69795		4.97627	1.52627		56.7843			3258	3353	1251	1640		166.85	281.45	24.75	256.75						5.9552	9.01684	6.72804	10.5681		8.06706	1.05714		56.7843
1870	1750	1739	1527	1263		62.7	119.55	18.6	-18.65	-30.35					5.31185	7.78132	3.867	6.55405	4.98534		5.69991	0.673892		58.0101			3294	3247	1272	1671		202.85	175.45	45.75	287.75						6.61082	7.09759	8.2153	11.4807		8.35111	1.09593		58.0101
1901	1781	1766	1474	1293		93.7	150.55	45.6	-71.65	-0.35					6.23694	9.01836	4.84279	2.97297	7.18475		6.05116	1.02614		59.2348			3239	3353	1204	1685		147.85	281.45	-22.25	301.75						5.60918	9.01684	3.39943	11.8928		7.47958	1.87052		59.2348
1821	1717	1782	1495	1319		13.7	86.55	61.6	-50.65	25.65					3.8496	6.46449	5.42103	4.39189	9.09091		5.84358	0.927162		60.4606			3322	3338	1241	1779		230.85	266.45	14.75	395.75						7.12074	8.74525	6.01983	14.66		9.13645	1.92438		60.4606
1897	1745	1748	1546	1303		89.7	114.55	27.6	0.35	9.65					6.11758	7.5818	4.19227	7.83784	7.91789		6.72947	0.713411		61.6819			3310	3335	1203	1609		218.85	263.45	-23.25	225.75						6.9022	8.69093	3.32861	9.65558		7.14433	1.39394		61.6819
1911	1751	1803	1537	1363		103.7	120.55	82.6	-8.65	69.65					6.53536	7.82123	6.17998	7.22973	12.3167		8.0166	1.11166		62.9103			3152	3415	1205	1666		60.85	343.45	-21.25	282.75						4.02477	10.1394	3.47025	11.3335		7.24199	2.03536		62.9103
1923	1840	1852	1593	1382		115.7	209.55	131.6	47.35	88.65					6.89346	11.3727	7.95085	11.0135	13.7097		10.188	1.23179		64.1311			3231	3367	1220	1647		139.85	295.45	-6.25	263.75						5.46349	9.27032	4.53258	10.7742		7.51015	1.49463		64.1311
1936	1740	1789	1551	1315		128.7	109.55	68.6	5.35	21.65					7.28141	7.38228	5.67402	8.17568	8.79765		7.46221	0.525793		65.3559			3354	3383	1245	1714		262.85	311.45	18.75	330.75						7.70352	9.56002	6.30312	12.7465		9.0783	1.39283		65.3559
1888	1828	1854	1492	1375		80.7	197.55	133.6	-53.65	81.65					5.849	10.8939	8.02313	4.18919	13.1965		8.43033	1.63709		66.5801			3228	3443	1213	1750		136.85	371.45	-13.25	366.75						5.40885	10.6464	4.03683	13.8063		8.47459	2.27736		66.5801
1964	1767	1845	1566	1312		156.7	136.55	124.6	20.35	18.65					8.11698	8.4597	7.69787	9.18919	8.57771		8.40829	0.248064		67.8024			3156	3458	1304	1762		64.85	386.45	77.75	378.75						4.09761	10.918	10.4816	14.1595		9.91418	2.10525		67.8024
1964	1773	1834	1544	1310		156.7	142.55	113.6	-1.65	16.65					8.11698	8.69912	7.30033	7.7027	8.43109		8.05004	0.25037		69.0231			3245	3393	1256	1809		153.85	321.45	29.75	425.75						5.71845	9.74108	7.08215	15.5431		9.5212	2.17413		69.0231
1941	1912	1826	1579	1307		133.7	281.55	105.6	33.35	13.65					7.43062	14.2458	7.0112	10.0676	8.21114		9.39327	1.32147		70.2474			3306	3486	1204	1757		214.85	414.45	-22.25	373.75						6.82936	11.425	3.39943	14.0124		8.91653	2.36387		70.2474
1911	1773	1891	1625	1256		103.7	142.55	170.6	79.35	-37.35					6.53536	8.69912	9.36032	13.1757	4.47214		8.44852	1.46137		71.4686			3277	3419	1338	1732		185.85	347.45	111.75	348.75						6.30122	10.2118	12.8895	13.2764		10.6698	1.60769		71.4686
1848	1858	1823	1527	1232		40.7	227.55	102.6	-18.65	-61.35					4.65533	12.091	6.90278	6.55405	2.71261		6.58315	1.56743		72.6907			3192	3430	1193	1809		100.85	358.45	-33.25	425.75						4.75323	10.411	2.6204	15.5431		8.33194	2.91194		72.6907
1950	1734	1861	1550	1279		142.7	103.55	140.6	4.35	-14.35					7.69919	7.14286	8.27611	8.10811	6.15836		7.47693	0.383192		73.9144			3321	3455	1301	1806		229.85	383.45	74.75	422.75						7.10253	10.8637	10.2691	15.4548		10.9225	1.72154		73.9144
1875	1848	1867	1619	1296		67.7	217.55	146.6	73.35	2.65					5.46106	11.6919	8.49295	12.7703	7.40469		9.16418	1.35375		75.1353			3333	3624	1305	1870		241.85	552.45	78.75	486.75						7.32107	13.9236	10.5524	17.3388		12.284	2.15771		75.1353
1923	1848	1849	1535	1259		115.7	217.55	128.6	-10.65	-34.35					6.89346	11.6919	7.84243	7.09459	4.69208		7.6429	1.14027		76.3583			3363	3549	1311	1816		271.85	477.45	84.75	432.75						7.86742	12.5656	10.9773	15.7492		11.7899	1.64124		76.3583
1967	1863	1928	1546	1269		159.7	232.55	207.6	0.35	-24.35					8.20651	12.2905	10.6975	7.83784	5.42522		8.89151	1.19183		77.5879			3315	3618	1229	1920		223.85	546.45	2.75	536.75						6.99326	13.815	5.16997	18.8107		11.1972	3.14668		77.5879
1934	1832	1972	1599	1330		126.7	201.55	251.6	53.35	36.65					7.22172	11.0535	12.2877	11.4189	9.89736		10.3758	0.876918		78.8095			3229	3600	1312	1791		137.85	528.45	85.75	407.75						5.42706	13.4891	11.0482	15.0132		11.2444	2.10402		78.8095
1906	1884	2040	1473	1341		98.7	253.55	319.6	-72.65	47.65					6.38615	13.1285	14.7452	2.90541	10.7038		9.57381	2.18271		80.0358			3288	3516	1353	1920		196.85	444.45	126.75	536.75						6.50155	11.9681	13.9518	18.8107		12.8081	2.54653		80.0358
2014	1860	1939	1571	1363		206.7	229.55	218.6	25.35	69.65					9.60907	12.1708	11.095	9.52703	12.3167		10.9437	0.600084		81.2609			3338	3705	1284	1856		246.85	633.45	57.75	472.75						7.41213	15.3902	9.06516	16.9267		12.1985	2.3322		81.2609
1967	1966	1988	1684	1229		159.7	335.55	267.6	138.35	-64.35					8.20651	16.4006	12.8659	17.1622	2.49267		11.4256	2.73764		82.4826			3292	3695	1287	1894		200.85	623.45	60.75	510.75						6.57439	15.2091	9.27762	18.0453		12.2766	2.63608		82.4826
1942	1933	1975	1558	1282		134.7	302.55	254.6	12.35	-11.35					7.46046	15.0838	12.3961	8.64865	6.3783		9.99346	1.62755		83.7036			3284	3763	1308	1885		192.85	691.45	81.75	501.75						6.4287	16.4403	10.7649	17.7804		12.8536	2.62647		83.7036
1942	1839	1992	1556	1274		134.7	208.55	271.6	10.35	-19.35					7.46046	11.3328	13.0105	8.51351	5.79179		9.22181	1.30728		84.9247			3503	3863	1279	1913		411.85	791.45	52.75	529.75						10.417	18.2509	8.71105	18.6046		13.9959	2.58334		84.9247
1954	1895	1902	1607	1320		146.7	264.55	181.6	61.35	26.65					7.81856	13.5674	9.75786	11.9595	9.16422		10.4535	1.026		86.1466			3405	3682	1317	1938		313.85	610.45	90.75	554.75						8.63231	14.9738	11.4023	19.3406		13.5872	2.31569		86.1466
1943	1917	1929	1681	1251		135.7	286.55	208.6	135.35	-42.35					7.4903	14.4453	10.7336	16.9595	4.10557		10.7469	2.31287		87.3727			3478	3618	1269	1973		386.85	546.45	42.75	589.75						9.96176	13.815	8.00283	20.3709		13.0376	2.72629		87.3727
2006	1883	1990	1623	1273		198.7	252.55	269.6	77.35	-20.35					9.37034	13.0886	12.9382	13.0405	5.71848		10.8312	1.461		88.5956			3422	3726	1264	1926		330.85	654.45	37.75	542.75						8.94191	15.7704	7.64872	18.9873		12.8371	2.71603		88.5956
2004	1918	2050	1608	1283		196.7	287.55	329.6	62.35	-10.35					9.31065	14.4852	15.1066	12.027	6.45161		11.4762	1.61978		89.8171			3377	3740	1314	1885		285.85	668.45	87.75	501.75						8.12238	16.0239	11.1898	17.7804		13.2791	2.2127		89.8171
1924	1988	2033	1568	1250		116.7	357.55	312.6	22.35	-43.35					6.92331	17.2785	14.4922	9.32432	4.03226		10.4101	2.42747		91.0386			3401	3726	1286	1977		309.85	654.45	59.75	593.75						8.55946	15.7704	9.2068	20.4887		13.5063	2.84072		91.0386
1969	1948	1956	1635	1408		161.7	317.55	235.6	89.35	114.65					8.26619	15.6824	11.7094	13.8514	15.6158		13.025	1.39345		92.2674			3534	3885	1345	1942		442.85	813.45	118.75	558.75						10.9816	18.6493	13.3853	19.4583		15.6186	2.04976		92.2674
2010	1916	2029	1665	1416		202.7	285.55	308.6	119.35	122.65					9.4897	14.4054	14.3477	15.8784	16.2023		14.0647	1.20386		93.4879			3506	3825	1313	2006		414.85	753.45	86.75	622.75						10.4717	17.5629	11.119	21.3424		15.124	2.61885		93.4879
2003	1856	2093	1593	1343		195.7	225.55	372.6	47.35	49.65					9.28081	12.0112	16.6606	11.0135	10.8504		11.9633	1.25307		94.7132			3529	3779	1364	2074		437.85	707.45	137.75	690.75						10.8905	16.73	14.7309	23.3441		16.4239	2.60556		94.7132
2186	1927	2102	1642	1285		378.7	296.55	381.6	96.35	-8.35					14.7419	14.8444	16.9859	14.3243	6.59824		13.4989	1.78627		95.9375			3695	3898	1330	1988		603.85	826.45	103.75	604.75						13.9137	18.8847	12.323	20.8125		16.4834	2.00873		95.9375
2115	1962	2066	1707	1353		307.7	331.55	345.6	161.35	59.65					12.6231	16.241	15.6849	18.7162	11.5836		14.9698	1.28718		97.1632			3691	3787	1342	2017		599.85	715.45	115.75	633.75						13.8408	16.8749	13.1728	21.6662		16.3887	1.93481		97.1632
2036	2052	2081	1724	1289		228.7	421.55	360.6	178.35	-4.35					10.2656	19.8324	16.227	19.8649	6.8915		14.6163	2.60721		98.385			3651	3887	1435	2032		559.85	815.45	208.75	648.75						13.1124	18.6855	19.7592	22.1077		18.4162	1.90688		98.385
2013	1923	2083	1655	1284		205.7	292.55	362.6	109.35	-9.35					9.57923	14.6848	16.2992	15.2027	6.52493		12.4582	1.88063		99.6084			3741	3909	1374	2061		649.85	837.45	147.75	677.75						14.7514	19.0838	15.4391	22.9614		18.0589	1.89051		99.6084
2059	2088	2067	1689	1327		251.7	457.55	346.6	143.35	33.65					10.952	21.269	15.721	17.5	9.67742		15.0239	2.13053		100.83			3751	3892	1347	2143		659.85	820.45	120.75	759.75						14.9335	18.776	13.5269	25.3753		18.153	2.65072		100.83
2144	1977	2072	1630	1368		336.7	346.55	351.6	84.35	74.65					13.4885	16.8396	15.9017	13.5135	12.6833		14.4853	0.797937		102.058			3579	3859	1377	2008		487.85	787.45	150.75	624.75						11.8011	18.1785	15.6516	21.4012		16.7581	2.02839		102.058
2084	2116	2117	1612	1318		276.7	485.55	396.6	66.35	24.65					11.698	22.3863	17.528	12.2973	9.0176		14.5854	2.38836		103.282			3708	3951	1364	2057		616.85	879.45	137.75	673.75						14.1504	19.8443	14.7309	22.8437		17.8923	2.08812		103.282
2120	2066	2101	1691	1299		312.7	435.55	380.6	145.35	5.65					12.7723	20.3911	16.9498	17.6351	7.62463		15.0746	2.22643		104.503			3744	3948	1326	2169		652.85	876.45	99.75	785.75						14.8061	19.79	12.0397	26.1407		18.1941	3.09639		104.503
2136	1975	2048	1669	1267		328.7	344.55	327.6	123.35	-26.35					13.2498	16.7598	15.0343	16.1486	5.27859		13.2942	2.09091		105.728			3796	3996	1329	2081		704.85	924.45	102.75	697.75						15.753	20.6591	12.2521	23.5502		18.0536	2.51579		105.728
2079	2059	2173	1711	1391		271.7	428.55	452.6	165.35	97.65					11.5488	20.1117	19.5519	18.9865	14.3695		16.9137	1.68432		106.959			3862	3983	1350	2077		770.85	911.45	123.75	693.75						16.955	20.4237	13.7394	23.4324		18.6376	2.10167		106.959
2164	2082	2158	1698	1344		356.7	451.55	437.6	152.35	50.65					14.0853	21.0295	19.0098	18.1081	10.9238		16.6313	1.8199		108.181			3891	3884	1417	2132		799.85	812.45	190.75	748.75						17.4831	18.6312	18.4844	25.0515		19.9126	1.73187		108.181
2134	2016	2056	1737	1341		326.7	385.55	335.6	191.35	47.65					13.1901	18.3958	15.3235	20.7432	10.7038		15.6713	1.79027		109.407			3780	3974	1338	2133		688.85	902.45	111.75	749.75						15.4617	20.2607	12.8895	25.081		18.4232	2.69404		109.407
2108	2106	2112	1640	1346		300.7	475.55	391.6	94.35	52.65					12.4142	21.9872	17.3473	14.1892	11.0704		15.4017	1.95333		110.631			3748	4049	1402	2077		656.85	977.45	175.75	693.75						14.8789	21.6187	17.4221	23.4324		19.338	1.94766		110.631
2170	2084	2175	1630	1449		362.7	453.55	454.6	84.35	155.65					14.2644	21.1093	19.6241	13.5135	18.6217		17.4266	1.50219		111.853			3948	3988	1454	2166		856.85	916.45	227.75	782.75						18.5212	20.5142	21.1048	26.0524		21.5482	1.5999		111.853
2150	1996	2152	1686	1344		342.7	365.55	431.6	140.35	50.65					13.6676	17.5978	18.7929	17.2973	10.9238		15.6559	1.46035		113.074			4002	4137	1373	2201		910.85	1065.45	146.75	817.75						19.5046	23.212	15.3683	27.0827		21.2919	2.50839		113.074
2157	1993	2138	1757	1367		349.7	362.55	417.6	211.35	73.65					13.8765	17.4781	18.287	22.0946	12.61		16.8692	1.68498		114.302			3968	4003	1424	2316		876.85	931.45	197.75	932.75						18.8854	20.7858	18.9802	30.4681		22.2799	2.76419		114.302
2175	2126	2067	1746	1287		367.7	495.55	346.6	200.35	-6.35					14.4136	22.7853	15.721	21.3514	6.74487		16.2032	2.85239		115.523			3747	4225	1397	2285		655.85	1153.45	170.75	901.75						14.8607	24.8054	17.068	29.5555		21.5724	3.40977		115.523
2081	2047	2130	1732	1430		273.7	416.55	409.6	186.35	136.65					11.6085	19.6329	17.9978	20.4054	17.2287		17.3747	1.54828		116.75			3917	4197	1421	2220		825.85	1125.45	194.75	836.75						17.9567	24.2984	18.7677	27.642		22.1662	2.30581		116.75
2216	2080	2077	1741	1399		408.7	449.55	356.6	195.35	105.65					15.6371	20.9497	16.0824	21.0135	14.956		17.7278	1.34048		117.974			3932	4120	1365	2143		840.85	1048.45	138.75	759.75						18.2298	22.9042	14.8017	25.3753		20.3278	2.36387		117.974
2072	2052	2220	1682	1344		264.7	421.55	499.6	136.35	50.65					11.3399	19.8324	21.2505	17.027	10.9238		16.0747	2.13033		119.197			3937	4117	1412	2220		845.85	1045.45	185.75	836.75						18.3209	22.8499	18.1303	27.642		21.7358	2.25067		119.197
2103	2095	2061	1776	1386		295.7	464.55	340.6	230.35	92.65					12.265	21.5483	15.5042	23.3784	14.0029		17.3397	2.17294		120.418			4007	4101	1321	2274		915.85	1029.45	94.75	890.75						19.5957	22.5602	11.6855	29.2317		20.7683	3.63675		120.418
2178	2180	2184	1698	1365		370.7	549.55	463.6	152.35	71.65					14.5031	24.9401	19.9494	18.1081	12.4633		17.9928	2.17784		121.643			3993	4292	1324	2295		901.85	1220.45	97.75	911.75						19.3407	26.0185	11.898	29.8499		21.7768	3.94431		121.643
2182	2198	2153	1739	1359		374.7	567.55	432.6	193.35	65.65					14.6225	25.6584	18.8291	20.8784	12.0235		18.4024	2.38685		122.864			4044	4182	1400	2231		952.85	1110.45	173.75	847.75						20.2695	24.0268	17.2804	27.9658		22.3857	2.31612		122.864
2235	2203	2233	1733	1370		427.7	572.55	512.6	187.35	76.65					16.2041	25.8579	21.7203	20.473	12.8299		19.417	2.25409		124.089			4082	4138	1387	2340		990.85	1066.45	160.75	956.75						20.9616	23.2301	16.3598	31.1746		22.9315	3.09712		124.089
2253	2110	2245	1737	1367		445.7	479.55	524.6	191.35	73.65					16.7413	22.1468	22.154	20.7432	12.61		18.8791	1.85405		125.313			3990	4273	1447	2387		898.85	1201.45	220.75	1003.75						19.2861	25.6745	20.6091	32.5581		24.5319	3.00878		125.313
2192	2075	2170	1757	1358		384.7	444.55	449.6	211.35	64.65					14.9209	20.7502	19.4434	22.0946	11.9501		17.8319	1.90201		126.539			4056	4309	1405	2461		964.85	1237.45	178.75	1077.75						20.4881	26.3263	17.6346	34.7365		24.7964	3.77492		126.539
2181	2178	2295	1722	1297		373.7	547.55	574.6	176.35	3.65					14.5927	24.8603	23.961	19.7297	7.47801		18.1243	3.22362		127.763			4146	4191	1390	2375		1054.85	1119.45	163.75	991.75						22.1271	24.1898	16.5722	32.2049		23.7735	3.23819		127.763
2143	2163	2172	1709	1449		335.7	532.55	451.6	163.35	155.65					13.4587	24.2618	19.5157	18.8514	18.6217		18.9418	1.71474		128.986			4115	4443	1384	2425		1023.85	1371.45	157.75	1041.75						21.5626	28.7525	16.1473	33.6768		25.0348	3.86813		128.986
2154	2077	2213	1692	1392		346.7	446.55	492.6	146.35	98.65					13.7869	20.83	20.9975	17.7027	14.4428		17.552	1.5245		130.206			4182	4410	1451	2468		1090.85	1338.45	224.75	1084.75						22.7827	28.155	20.8924	34.9426		26.6932	3.15081		130.206
2222	2135	2211	1769	1483		414.7	504.55	490.6	223.35	189.65					15.8162	23.1445	20.9252	22.9054	21.1144		20.7811	1.32061		131.428			4167	4311	1390	2287		1075.85	1239.45	163.75	903.75						22.5096	26.3625	16.5722	29.6144		23.7647	2.80288		131.428
2235	2216	2230	1743	1399		427.7	585.55	509.6	197.35	105.65					16.2041	26.3767	21.6119	21.1486	14.956		20.0595	2.05442		132.652			4201	4272	1424	2412		1109.85	1200.45	197.75	1028.75						23.1288	25.6563	18.9802	33.2941		25.2648	3.00946		132.652
2219	2199	2257	1744	1352		411.7	568.55	536.6	198.35	58.65					15.7266	25.6983	22.5876	21.2162	11.5103		19.3478	2.53827		133.878			4211	4345	1416	2443		1119.85	1273.45	189.75	1059.75						23.3109	26.9781	18.4136	34.2067		25.7273	3.32657		133.878
2154	2122	2161	1695	1340		346.7	491.55	440.6	149.35	46.65					13.7869	22.6257	19.1182	17.9054	10.6305		16.8133	2.09374		135.097			3983	4357	1433	2378		891.85	1285.45	206.75	994.75						19.1586	27.1954	19.6176	32.2932		24.5662	3.16689		135.097
2195	2163	2199	1736	1421		387.7	532.55	478.6	190.35	127.65					15.0104	24.2618	20.4915	20.6757	16.5689		19.4017	1.63919		136.326			4092	4257	1480	2467		1000.85	1185.45	253.75	1083.75						21.1437	25.3848	22.9462	34.9132		26.0969	3.06451		136.326
2197	2158	2214	1842	1423		389.7	527.55	493.6	296.35	129.65					15.0701	24.0623	21.0336	27.8378	16.7155		20.9439	2.34135		137.547			4279	4281	1473	2396		1187.85	1209.45	246.75	1012.75						24.5493	25.8193	22.4504	32.8231		26.4105	2.24754		137.547
2276	2120	2248	1737	1361		468.7	489.55	527.6	191.35	67.65					17.4276	22.5459	22.2624	20.7432	12.1701		19.0298	1.94127		138.768			4197	4421	1432	2375		1105.85	1349.45	205.75	991.75						23.0559	28.3542	19.5467	32.2049		25.7904	2.80148		138.768
2334	2257	2222	1705	1337		526.7	626.55	501.6	159.35	43.65					19.1585	28.0128	21.3227	18.5811	10.4106		19.4971	2.82284		139.992			4209	4411	1409	2484		1117.85	1339.45	182.75	1100.75						23.2745	28.1731	17.9179	35.4136		26.1947	3.7186		139.992
2229	2141	2179	1708	1452		421.7	510.55	458.6	162.35	158.65					16.0251	23.3839	19.7687	18.7838	18.8416		19.3606	1.18493		141.218			4478	4526	1455	2602		1386.85	1454.45	228.75	1218.75						28.1734	30.2553	21.1756	38.8873		29.6229	3.64789		141.218
2235	2110	2271	1754	1401		427.7	479.55	550.6	208.35	107.65					16.2041	22.1468	23.0936	21.8919	15.1026		19.6878	1.6683		142.439			4332	4538	1518	2502		1240.85	1466.45	291.75	1118.75						25.5145	30.4726	25.6374	35.9435		29.392	2.47019		142.439
2187	2262	2319	1749	1401		379.7	631.55	598.6	203.35	107.65					14.7717	28.2123	24.8283	21.5541	15.1026		20.8938	2.65042		143.664			4307	4424	1412	2389		1215.85	1352.45	185.75	1005.75						25.0592	28.4085	18.1303	32.617		26.0537	3.06038		143.664
2174	2157	2290	1802	1419		366.7	526.55	569.6	256.35	125.65					14.3838	24.0223	23.7803	25.1351	16.4223		20.7488	2.21786		144.888			4389	4518	1390	2471		1297.85	1446.45	163.75	1087.75						26.5525	30.1105	16.5722	35.0309		27.0665	3.9061		144.888
2130	2172	2239	1733	1511		322.7	541.55	518.6	187.35	217.65					13.0707	24.6209	21.9371	20.473	23.1672		20.6538	2.01541		146.112			4446	4523	1424	2449		1354.85	1451.45	197.75	1065.75						27.5906	30.201	18.9802	34.3833		27.7888	3.2524		146.112
2269	2228	2308	1685	1374		461.7	597.55	587.6	139.35	80.65					17.2187	26.8555	24.4308	17.2297	13.1232		19.7716	2.54038		147.335			4416	4473	1429	2597		1324.85	1401.45	202.75	1213.75						27.0443	29.2957	19.3343	38.7401		28.6036	3.99561		147.335
2275	2279	2191	1773	1383		467.7	648.55	470.6	227.35	89.65					17.3978	28.8907	20.2024	23.1757	13.783		20.6899	2.57111		148.556			4118	4476	1444	2565		1026.85	1404.45	217.75	1181.75						21.6172	29.35	20.3966	37.7981		27.2905	4.02454		148.556
2202	2169	2208	1737	1387		394.7	538.55	487.6	191.35	93.65					15.2193	24.5012	20.8168	20.7432	14.0762		19.0714	1.93796		149.778			4341	4596	1489	2551		1249.85	1524.45	262.75	1167.75						25.6784	31.5227	23.5836	37.3859		29.5427	3.10753		149.778
2157	2212	2236	1661	1530		349.7	581.55	515.6	115.35	236.65					13.8765	26.2171	21.8287	15.6081	24.5601		20.4181	2.43622		151.007			4367	4561	1403	2732		1275.85	1489.45	176.75	1348.75						26.1519	30.889	17.4929	42.7142		29.312	5.25818		151.007
2244	2120	2187	1693	1514		436.7	489.55	466.6	147.35	220.65					16.4727	22.5459	20.0578	17.7703	23.3871		20.0468	1.32966		152.228			4428	4575	1411	2601		1336.85	1503.45	184.75	1217.75						27.2628	31.1425	18.0595	38.8578		28.8306	4.32401		152.228
2256	2157	2393	1763	1472		448.7	526.55	672.6	217.35	178.65					16.8308	24.0223	27.5027	22.5	20.3079		22.2328	1.78791		153.455			4308	4519	1416	2660		1216.85	1447.45	189.75	1276.75						25.0774	30.1286	18.4136	40.5946		28.5535	4.67592		153.455
2202	2149	2259	1817	1370		394.7	518.55	538.6	271.35	76.65					15.2193	23.7031	22.6599	26.1486	12.8299		20.1122	2.57678		154.678			4589	4500	1403	2649		1497.85	1428.45	176.75	1265.75						30.1949	29.7845	17.4929	40.2708		29.4358	4.66126		154.678
2254	2217	2271	1823	1444		446.7	586.55	550.6	277.35	150.65					16.7711	26.4166	23.0936	26.5541	18.2551		22.2181	2.03186		155.905			4440	4567	1401	2596		1348.85	1495.45	174.75	1212.75						27.4813	30.9977	17.3513	38.7106		28.6352	4.4324		155.905
2206	2191	2240	1727	1403		398.7	560.55	519.6	181.35	109.65					15.3387	25.3791	21.9733	20.0676	15.2493		19.6016	1.95367		157.126			4598	4431	1448	2554		1506.85	1359.45	221.75	1170.75						30.3588	28.5352	20.6799	37.4742		29.262	3.44993		157.126
2221	2233	2355	1685	1425		413.7	602.55	634.6	139.35	131.65					15.7863	27.0551	26.1294	17.2297	16.8622		20.6125	2.45706		158.353			4460	4592	1447	2564		1368.85	1520.45	220.75	1180.75						27.8456	31.4503	20.6091	37.7686		29.4184	3.58158		158.353
2185	2222	2265	1712	1439		377.7	591.55	544.6	166.35	145.65					14.712	26.6161	22.8768	19.0541	17.8886		20.2295	2.06278		159.574			4489	4716	1482	2623		1397.85	1644.45	255.75	1239.75						28.3737	33.6955	23.0878	39.5055		31.1656	3.52371		159.574
2202	2276	2389	1690	1428		394.7	645.55	668.6	144.35	134.65					15.2193	28.7709	27.3581	17.5676	17.0821		21.1996	2.83868		160.8			4379	4512	1402	2670		1287.85	1440.45	175.75	1286.75						26.3704	30.0018	17.4221	40.889		28.6708	4.85525		160.8
2266	2260	2263	1797	1453		458.7	629.55	542.6	251.35	159.65					17.1292	28.1325	22.8045	24.7973	18.915		22.3557	1.98354		162.024			4392	4532	1438	2648		1300.85	1460.45	211.75	1264.75						26.6072	30.3639	19.9717	40.2414		29.296	4.23394		162.024
2290	2236	2251	1770	1411		482.7	605.55	530.6	224.35	117.65					17.8454	27.1748	22.3708	22.973	15.8358		21.2399	2.0029		163.249			4310	4578	1479	2588		1218.85	1506.45	252.75	1204.75						25.1138	31.1968	22.8754	38.4751		29.4153	3.49438		163.249
2281	2162	2369	1792	1452		473.7	531.55	648.6	246.35	158.65					17.5768	24.2219	26.6353	24.4595	18.8416		22.347	1.75228		164.47			4551	4655	1471	2623		1459.85	1583.45	244.75	1239.75						29.5028	32.591	22.3088	39.5055		30.977	3.56664		164.47
2153	2300	2320	1797	1532		345.7	669.55	599.6	251.35	238.65					13.7571	29.7287	24.8645	24.7973	24.7067		23.5709	2.6334		165.698			4541	4479	1447	2551		1449.85	1407.45	220.75	1167.75						29.3207	29.4043	20.6091	37.3859		29.18	3.42623		165.698
2252	2224	2341	1761	1469		444.7	593.55	620.6	215.35	175.65					16.7114	26.6959	25.6234	22.3649	20.088		22.2967	1.82344		166.919			4577	4756	1488	2669		1485.85	1684.45	261.75	1285.75						29.9763	34.4197	23.5128	40.8596		32.1921	3.65523		166.919
2282	2283	2275	1691	1467		474.7	652.55	554.6	145.35	173.65					17.6067	29.0503	23.2382	17.6351	19.9413		21.4943	2.15119		168.146			4518	4600	1477	2586		1426.85	1528.45	250.75	1202.75						28.9018	31.5952	22.7337	38.4162		30.4117	3.24942		168.146
2290	2193	2313	1844	1470		482.7	562.55	592.6	298.35	176.65					17.8454	25.4589	24.6115	27.973	20.1613		23.21	1.84094		169.371			4569	4670	1433	2657		1477.85	1598.45	206.75	1273.75						29.8306	32.8626	19.6176	40.5063		30.7043	4.32451		169.371
2342	2262	2329	1762	1436		534.7	631.55	608.6	216.35	142.65					19.3972	28.2123	25.1897	22.4324	17.6686		22.5801	1.90797		170.592			4548	4841	1475	2713		1456.85	1769.45	248.75	1329.75						29.4482	35.9587	22.5921	42.1548		32.5385	4.20965		170.592
2306	2215	2347	1819	1580		498.7	584.55	626.6	273.35	286.65					18.3229	26.3368	25.8403	26.2838	28.2258		25.0019	1.71946		171.813			4343	4669	1494	2678		1251.85	1597.45	267.75	1294.75						25.7148	32.8445	23.9377	41.1245		30.9054	3.91239		171.813
2360	2242	2311	1793	1460		552.7	611.55	590.6	247.35	166.65					19.9343	27.4142	24.5392	24.527	19.4282		23.1686	1.51988		173.042			4670	4752	1407	2710		1578.85	1680.45	180.75	1326.75						31.67	34.3473	17.7762	42.0665		31.465	5.06726		173.042
2285	2273	2354	1841	1425		477.7	642.55	633.6	295.35	131.65					17.6962	28.6512	26.0932	27.7703	16.8622		23.4146	2.54169		174.263			4661	4624	1499	2696		1569.85	1552.45	272.75	1312.75						31.5061	32.0297	24.2918	41.6544		32.3705	3.56277		174.263
2271	2306	2376	1752	1451		463.7	675.55	655.6	206.35	157.65					17.2784	29.9681	26.8883	21.7568	18.7683		22.932	2.40665		175.489			4526	4545	1510	2659		1434.85	1473.45	283.75	1275.75						29.0475	30.5993	25.0708	40.5652		31.3207	3.29405		175.489
2307	2209	2333	1750	1449		499.7	578.55	612.6	204.35	155.65					18.3527	26.0974	25.3343	21.6216	18.6217		22.0055	1.62426		176.711			4891	4642	1450	2610		1799.85	1570.45	223.75	1226.75						35.6948	32.3556	20.8215	39.1228		31.9987	3.97355		176.711
2252	2234	2301	1748	1461		444.7	603.55	580.6	202.35	167.65					16.7114	27.095	24.1778	21.4865	19.5015		21.7944	1.8023		177.937			4703	4552	1488	2696		1611.85	1480.45	261.75	1312.75						32.271	30.7261	23.5128	41.6544		32.041	3.72973		177.937
2260	2292	2301	1768	1571		452.7	661.55	580.6	222.35	277.65					16.9502	29.4094	24.1778	22.8378	27.566		24.1882	2.15503		179.159			4891	4787	1421	2656		1799.85	1715.45	194.75	1272.75						35.6948	34.981	18.7677	40.4769		32.4801	4.73081		179.159
2317	2357	2256	1725	1426		509.7	726.55	535.6	179.35	132.65					18.6511	32.0032	22.5515	19.9324	16.9355		22.0148	2.65994		180.388			4382	4736	1483	2740		1290.85	1664.45	256.75	1356.75						26.4251	34.0576	23.1586	42.9497		31.6477	4.40532		180.388
2208	2301	2321	1723	1379		400.7	670.55	600.6	177.35	85.65					15.3984	29.7686	24.9006	19.7973	13.4897		20.6709	3.00657		181.61			4670	4698	1556	2896		1578.85	1626.45	329.75	1512.75						31.67	33.3695	28.3286	47.5419		35.2275	4.23623		181.61
2245	2280	2202	1800	1412		437.7	649.55	481.6	254.35	118.65					16.5025	28.9306	20.5999	25	15.9091		21.3884	2.49443		182.835			4937	4674	1430	2725		1845.85	1602.45	203.75	1341.75						36.5325	32.935	19.4051	42.5081		32.8452	4.89568		182.835
2187	2273	2297	1795	1470		379.7	642.55	576.6	249.35	176.65					14.7717	28.6512	24.0332	24.6622	20.1613		22.4559	2.34574		184.059			4662	4647	1482	2856		1570.85	1575.45	255.75	1472.75						31.5243	32.4461	23.0878	46.3644		33.3557	4.82043		184.059
2407	2357	2341	1761	1452		599.7	726.55	620.6	215.35	158.65					21.3369	32.0032	25.6234	22.3649	18.8416		24.034	2.26997		185.285			4846	4615	1509	2931		1754.85	1543.45	282.75	1547.75						34.8753	31.8667	25	48.5723		35.0786	4.94987		185.285
2344	2306	2368	1810	1512		536.7	675.55	647.6	264.35	218.65					19.4569	29.9681	26.5992	25.6757	23.2405		24.9881	1.75381		186.507			4827	4853	1463	2810		1735.85	1781.45	236.75	1426.75						34.5292	36.176	21.7422	45.0103		34.3644	4.79552		186.507
2295	2265	2234	1787	1473		487.7	634.55	513.6	241.35	179.65					17.9946	28.332	21.7564	24.1216	20.3812		22.5172	1.76041		187.732			4764	4698	1385	2754		1672.85	1626.45	158.75	1370.75						33.3819	33.3695	16.2181	43.3618		31.5828	5.63654		187.732
2319	2317	2348	1905	1544		511.7	686.55	627.6	359.35	250.65					18.7108	30.407	25.8764	32.0946	25.5865		26.5351	2.32865		188.953			4831	4749	1437	2760		1739.85	1677.45	210.75	1376.75						34.6021	34.293	19.9008	43.5384		33.0836	4.88924		188.953
2359	2256	2272	1771	1390		551.7	625.55	551.6	225.35	96.65					19.9045	27.9729	23.1297	23.0405	14.2962		21.6688	2.24973		190.179			4724	4842	1528	2669		1632.85	1770.45	301.75	1285.75						32.6534	35.9768	26.3456	40.8596		33.9589	3.04628		190.179
2190	2335	2382	1822	1473		382.7	704.55	661.6	276.35	179.65					14.8612	31.1253	27.1052	26.4865	20.3812		23.9919	2.85663		191.401			4756	4730	1469	2837		1664.85	1658.45	242.75	1453.75						33.2362	33.9489	22.1671	45.8051		33.7893	4.82861		191.401
2240	2463	2309	1959	1447		432.7	832.55	588.6	413.35	153.65					16.3533	36.233	24.4669	35.7432	18.4751		26.2543	4.19139		192.626			4783	4884	1505	2786		1691.85	1812.45	278.75	1402.75						33.7279	36.7373	24.7167	44.3038		34.8714	4.05048		192.626
2185	2337	2389	1818	1483		377.7	706.55	668.6	272.35	189.65					14.712	31.2051	27.3581	26.2162	21.1144		24.1212	2.85151		193.848			4856	4671	1490	2737		1764.85	1599.45	263.75	1353.75						35.0574	32.8807	23.6544	42.8614		33.6134	3.95104		193.848
2269	2314	2315	1947	1419		461.7	683.55	594.6	401.35	125.65					17.2187	30.2873	24.6838	34.9324	16.4223		24.7089	3.6084		195.077			4664	4654	1439	2803		1572.85	1582.45	212.75	1419.75						31.5607	32.5729	20.0425	44.8042		32.2451	5.05974		195.077
2271	2278	2223	1801	1535		463.7	647.55	502.6	255.35	241.65					17.2784	28.8508	21.3589	25.0676	24.9267		23.4965	1.95468		196.298			4783	4724	1424	2822		1691.85	1652.45	197.75	1438.75						33.7279	33.8403	18.9802	45.3636		32.978	5.40561		196.298
2295	2303	2389	1758	1469		487.7	672.55	668.6	212.35	175.65					17.9946	29.8484	27.3581	22.1622	20.088		23.4903	2.22404		197.523			4821	4781	1422	2840		1729.85	1709.45	195.75	1456.75						34.42	34.8723	18.8385	45.8934		33.5061	5.56242		197.523
2344	2211	2232	1714	1447		536.7	580.55	511.6	168.35	153.65					19.4569	26.1772	21.6841	19.1892	18.4751		20.9965	1.4019		198.749			4806	4883	1551	2728		1714.85	1811.45	324.75	1344.75						34.1468	36.7192	27.9745	42.5964		35.3592	3.03082		198.749
2308	2300	2322	1833	1480		500.7	669.55	601.6	287.35	186.65					18.3826	29.7287	24.9368	27.2297	20.8944		24.2344	2.06218		199.974			4704	4755	1522	2860		1612.85	1683.45	295.75	1476.75						32.2892	34.4016	25.9207	46.4822		34.7734	4.29899		199.974
2330	2368	2239	1794	1458		522.7	737.55	518.6	248.35	164.65					19.0391	32.4421	21.9371	24.5946	19.2815		23.4589	2.46261		201.196			4868	4889	1410	2885		1776.85	1817.45	183.75	1501.75						35.2759	36.8278	17.9887	47.2181		34.3276	6.0572		201.196
2365	2305	2318	1865	1541		557.7	674.55	597.6	319.35	247.65					20.0836	29.9282	24.7922	29.3919	25.3666		25.9125	1.78552		202.424			4944	4952	1452	2786		1852.85	1880.45	225.75	1402.75						36.66	37.9685	20.9632	44.3038		34.9739	4.95949		202.424
2371	2258	2272	1732	1528		563.7	627.55	551.6	186.35	234.65					20.2626	28.0527	23.1297	20.4054	24.4135		23.2528	1.43962		203.645			4890	4954	1568	2886		1798.85	1882.45	341.75	1502.75						35.6766	38.0047	29.1785	47.2476		37.5268	3.73987		203.645
2340	2335	2344	1760	1468		532.7	704.55	623.6	214.35	174.65					19.3375	31.1253	25.7318	22.2973	20.0147		23.7013	2.16615		204.871			4768	4992	1471	2787		1676.85	1920.45	244.75	1403.75						33.4547	38.6927	22.3088	44.3332		34.6974	4.68894		204.871
2278	2251	2380	1799	1590		470.7	620.55	659.6	253.35	296.65					17.4873	27.7733	27.0329	24.9324	28.9589		25.237	2.04526		206.096			4762	4777	1405	2752		1670.85	1705.45	178.75	1368.75						33.3455	34.7999	17.6346	43.3029		32.2707	5.35007		206.096
2315	2288	2327	1812	1515		507.7	657.55	606.6	266.35	221.65					18.5915	29.2498	25.1175	25.8108	23.4604		24.446	1.74122		207.322			4830	4853	1629	2643		1738.85	1781.45	402.75	1259.75						34.5839	36.176	33.4986	40.0942		36.0882	1.44409		207.322
2274	2385	2350	1756	1526		466.7	754.55	629.6	210.35	232.65					17.3679	33.1205	25.9487	22.027	24.2669		24.5462	2.583		208.542			4726	4791	1524	2949		1634.85	1719.45	297.75	1565.75						32.6899	35.0534	26.0623	49.1022		35.7269	4.8475		208.542
2394	2308	2230	1837	1491		586.7	677.55	509.6	291.35	197.65					20.949	30.0479	21.6119	27.5	21.7009		24.3619	1.85027		209.767			4898	4825	1431	2862		1806.85	1753.45	204.75	1478.75						35.8222	35.669	19.4759	46.5411		34.3771	5.58096		209.767
2311	2326	2373	1842	1445		503.7	695.55	652.6	296.35	151.65					18.4721	30.7662	26.7799	27.8378	18.3284		24.4369	2.54959		210.99			4915	4958	1438	2689		1823.85	1886.45	211.75	1305.75						36.1319	38.0771	19.9717	41.4483		33.9072	4.77323		210.99
2316	2324	2359	1726	1524		508.7	693.55	638.6	180.35	230.65					18.6213	30.6864	26.2739	20	24.1202		23.9404	2.17721		212.216			4907	4935	1541	2935		1815.85	1863.45	314.75	1551.75						35.9862	37.6607	27.2663	48.69		37.4008	4.39909		212.216
2364	2416	2386	1763	1598		556.7	785.55	665.6	217.35	304.65					20.0537	34.3575	27.2497	22.5	29.5455		26.7413	2.53812		213.44			4809	4830	1428	2868		1717.85	1758.45	201.75	1484.75						34.2014	35.7595	19.2635	46.7177		33.9855	5.64241		213.44
2362	2360	2333	1937	1499		554.7	729.55	612.6	391.35	205.65					19.994	32.1229	25.3343	34.2568	22.2874		26.7991	2.76378		214.665			5021	4929	1456	2984		1929.85	1857.45	229.75	1600.75						38.0623	37.5521	21.2465	50.1325		36.7483	5.92885		214.665
2312	2316	2469	1805	1497		504.7	685.55	748.6	259.35	203.65					18.5019	30.3671	30.2494	25.3378	22.1408		25.3194	2.30614		215.884			5029	4753	1411	2974		1937.85	1681.45	184.75	1590.75						38.208	34.3654	18.0595	49.8381		35.1177	6.56879		215.884
2342	2330	2368	1809	1476		534.7	699.55	647.6	263.35	182.65					19.3972	30.9258	26.5992	25.6081	20.6012		24.6263	2.09863		217.113			5047	4877	1413	2951		1955.85	1805.45	186.75	1567.75						38.5358	36.6105	18.2011	49.161		35.6271	6.43078		217.113
2428	2311	2266	1845	1554		620.7	680.55	545.6	299.35	260.65					21.9636	30.1676	22.9129	28.0405	26.3196		25.8809	1.53926		218.333			4960	5055	1469	2842		1868.85	1983.45	242.75	1458.75						36.9514	39.8334	22.1671	45.9523		36.2261	5.04804		218.333
2310	2331	2352	1887	1488		502.7	700.55	631.6	341.35	194.65					18.4423	30.9657	26.021	30.8784	21.4809		25.5576	2.5002		219.559			4955	4736	1478	2897		1863.85	1664.45	251.75	1513.75						36.8603	34.0576	22.8045	47.5714		35.3235	5.08838		219.559
2293	2333	2290	1768	1534		485.7	702.55	569.6	222.35	240.65					17.9349	31.0455	23.7803	22.8378	24.8534		24.0904	2.10369		220.783			4858	4815	1486	2886		1766.85	1743.45	259.75	1502.75						35.0938	35.488	23.3711	47.2476		35.3001	4.87443		220.783
2225	2281	2312	1782	1535		417.7	650.55	591.6	236.35	241.65					15.9057	28.9705	24.5754	23.7838	24.9267		23.6324	2.13054		222.004			4834	4819	1586	2788		1742.85	1747.45	359.75	1404.75						34.6567	35.5604	30.4533	44.3627		36.2583	2.92164		222.004
2356	2340	2269	1745	1430		548.7	709.55	548.6	199.35	136.65					19.815	31.3248	23.0213	21.2838	17.2287		22.5347	2.39393		223.225			4978	4873	1558	2884		1886.85	1801.45	331.75	1500.75						37.2792	36.5381	28.4703	47.1887		37.3691	3.83311		223.225
2357	2386	2325	1777	1495		549.7	755.55	604.6	231.35	201.65					19.8448	33.1604	25.0452	23.4459	21.9941		24.6981	2.28216		224.451			4920	4817	1424	2719		1828.85	1745.45	197.75	1335.75						36.2229	35.5242	18.9802	42.3315		33.2647	5.00092		224.451
2433	2349	2301	1790	1530		625.7	718.55	580.6	244.35	236.65					22.1128	31.684	24.1778	24.3243	24.5601		25.3718	1.63777		225.672			5029	5024	1488	2991		1937.85	1952.45	261.75	1607.75						38.208	39.2721	23.5128	50.3385		37.8328	5.50507		225.672
2317	2377	2258	1844	1504		509.7	746.55	537.6	298.35	210.65					18.6511	32.8013	22.6238	27.973	22.654		24.9406	2.46109		226.897			4726	4929	1573	2845		1634.85	1857.45	346.75	1461.75						32.6899	37.5521	29.5326	46.0406		36.4538	3.59611		226.897
2342	2273	2407	1793	1462		534.7	642.55	686.6	247.35	168.65					19.3972	28.6512	28.0087	24.527	19.5748		24.0318	1.98424		228.122			4762	4839	1486	2952		1670.85	1767.45	259.75	1568.75						33.3455	35.9225	23.3711	49.1905		35.4574	5.31783		228.122
2300	2225	2386	1796	1550		492.7	594.55	665.6	250.35	256.65					18.1438	26.7358	27.2497	24.7297	26.0264		24.5771	1.66303		229.347			4893	4833	1493	2893		1801.85	1761.45	266.75	1509.75						35.7312	35.8139	23.8669	47.4536		35.7164	4.81477		229.347
2363	2376	2371	1759	1467		555.7	745.55	650.6	213.35	173.65					20.0239	32.7614	26.7076	22.2297	19.9413		24.3328	2.4388		230.569			5195	4760	1441	2962		2103.85	1688.45	214.75	1578.75						41.2311	34.4921	20.1841	49.4848		36.3481	6.19903		230.569
2416	2342	2349	1826	1542		608.7	711.55	628.6	280.35	248.65					21.6055	31.4046	25.9125	26.7568	25.4399		26.2239	1.56788		231.798			5053	5152	1547	2948		1961.85	2080.45	320.75	1564.75						38.6451	41.5897	27.6912	49.0727		39.2497	4.43407		231.798
2327	2342	2366	1698	1490		519.7	711.55	645.6	152.35	196.65					18.9496	31.4046	26.5269	18.1081	21.6276		23.3234	2.49774		233.02			4810	4787	1474	2925		1718.85	1715.45	247.75	1541.75						34.2196	34.981	22.5212	48.3956		35.0294	5.28968		233.02
2459	2298	2316	1765	1550		651.7	667.55	595.6	219.35	256.65					22.8887	29.6488	24.7199	22.6351	26.0264		25.1838	1.2772		234.247			4964	4840	1542	2970		1872.85	1768.45	315.75	1586.75						37.0242	35.9406	27.3371	49.7203		37.5056	4.61229		234.247
2353	2303	2335	1892	1438		545.7	672.55	614.6	346.35	144.65					19.7255	29.8484	25.4066	31.2162	17.8152		24.8024	2.66045		235.472			5092	5025	1517	2946		2000.85	1953.45	290.75	1562.75						39.3553	39.2902	25.5666	49.0138		38.3065	4.822		235.472
2330	2287	2210	1802	1499		522.7	656.55	489.6	256.35	205.65					19.0391	29.2099	20.889	25.1351	22.2874		23.3121	1.77887		236.696			4827	5040	1457	2846		1735.85	1968.45	230.75	1462.75						34.5292	39.5618	21.3173	46.0701		35.3696	5.24602		236.696
2388	2260	2385	1825	1508		580.7	629.55	664.6	279.35	214.65					20.7699	28.1325	27.2136	26.6892	22.9472		25.1505	1.40642		237.919			5043	4942	1507	2936		1951.85	1870.45	280.75	1552.75						38.4629	37.7874	24.8584	48.7195		37.457	4.88782		237.919
2380	2291	2326	1780	1530		572.7	660.55	605.6	234.35	236.65					20.5312	29.3695	25.0813	23.6486	24.5601		24.6382	1.42187		239.147			5027	4923	1524	2960		1935.85	1851.45	297.75	1576.75						38.1716	37.4434	26.0623	49.426		37.7758	4.77143		239.147
2388	2347	2378	1774	1425		580.7	716.55	657.6	228.35	131.65					20.7699	31.6042	26.9606	23.2432	16.8622		23.888	2.53456		240.368			4917	5101	1563	3081		1825.85	2029.45	336.75	1697.75						36.1683	40.6663	28.8244	52.9879		39.6617	5.06828		240.368
2315	2392	2399	1822	1539		507.7	761.55	678.6	276.35	245.65					18.5915	33.3998	27.7196	26.4865	25.2199		26.2835	2.37744		241.593			4789	4886	1484	2951		1697.85	1814.45	257.75	1567.75						33.8372	36.7735	23.2295	49.161		35.7503	5.33327		241.593
2321	2389	2288	1814	1598		513.7	758.55	567.6	268.35	304.65					18.7705	33.2801	23.708	25.9459	29.5455		26.25	2.4777		242.817			5134	4984	1520	2933		2042.85	1912.45	293.75	1549.75						40.1202	38.5479	25.779	48.6311		38.2696	4.71591		242.817
2396	2227	2362	1853	1545		588.7	596.55	641.6	307.35	251.65					21.0087	26.8156	26.3824	28.5811	25.6598		25.6895	1.26532		244.038			4868	4950	1514	3045		1776.85	1878.45	287.75	1661.75						35.2759	37.9323	25.3541	51.9282		37.6226	5.48307		244.038
2350	2329	2389	1789	1537		542.7	698.55	668.6	243.35	243.65					19.6359	30.8859	27.3581	24.2568	25.0733		25.442	1.85147		245.26			4993	5028	1527	3076		1901.85	1956.45	300.75	1692.75						37.5524	39.3446	26.2748	52.8407		39.0031	5.4445		245.26
2413	2396	2312	1831	1508		605.7	765.55	591.6	285.35	214.65					21.516	33.5595	24.5754	27.0946	22.9472		25.9385	2.11873		246.486			5018	4886	1508	2950		1926.85	1814.45	281.75	1566.75						38.0076	36.7735	24.9292	49.1316		37.2105	4.94781		246.486
2310	2320	2308	1833	1492		502.7	689.55	587.6	287.35	198.65					18.4423	30.5267	24.4308	27.2297	21.7742		24.4807	2.09645		247.711			5041	4910	1536	2986		1949.85	1838.45	309.75	1602.75						38.4265	37.208	26.9122	50.1913		38.1845	4.76307		247.711
2328	2355	2232	1826	1518		520.7	724.55	511.6	280.35	224.65					18.9794	31.9234	21.6841	26.7568	23.6804		24.6048	2.22736		248.937			5031	5027	1551	3052		1939.85	1955.45	324.75	1668.75						38.2444	39.3265	27.9745	52.1342		39.4199	4.9501		248.937
2376	2291	2318	1829	1445		568.7	660.55	597.6	283.35	151.65					20.4118	29.3695	24.7922	26.9595	18.3284		23.9723	2.04029		250.161			5034	4896	1483	2941		1942.85	1824.45	256.75	1557.75						38.299	36.9545	23.1586	48.8666		36.8197	5.27542		250.161
2294	2400	2329	1816	1517		486.7	769.55	608.6	270.35	223.65					17.9648	33.7191	25.1897	26.0811	23.607		25.3123	2.53154		251.386			5045	4915	1531	2952		1953.85	1843.45	304.75	1568.75						38.4994	37.2986	26.5581	49.1905		37.8866	4.62632		251.386
2344	2393	2410	1880	1553		536.7	762.55	689.6	334.35	259.65					19.4569	33.4397	28.1171	30.4054	26.2463		27.5331	2.34905		252.609			5110	4811	1536	2843		2018.85	1739.45	309.75	1459.75						39.6831	35.4155	26.9122	45.9817		36.9981	4.00152		252.609
2356	2355	2428	1846	1549		548.7	724.55	707.6	300.35	255.65					19.815	31.9234	28.7676	28.1081	25.9531		26.9134	2.01588		253.838			5044	4955	1436	2866		1952.85	1883.45	209.75	1482.75						38.4811	38.0228	19.83	46.6588		35.7482	5.66475		253.838
2375	2209	2340	1786	1485		567.7	578.55	619.6	240.35	191.65					20.382	26.0974	25.5873	24.0541	21.261		23.4763	1.14329		255.059			5005	5106	1489	3035		1913.85	2034.45	262.75	1651.75						37.7709	40.7568	23.5836	51.6338		38.4363	5.77787		255.059
2279	2211	2323	1861	1516		471.7	580.55	602.6	315.35	222.65					17.5172	26.1772	24.9729	29.1216	23.5337		24.2645	1.9211		256.285			5137	4994	1512	3061		2045.85	1922.45	285.75	1677.75						40.1748	38.7289	25.2125	52.3992		39.1289	5.56044		256.285
2333	2335	2289	1790	1548		525.7	704.55	568.6	244.35	254.65					19.1286	31.1253	23.7441	24.3243	25.8798		24.8404	1.93226		257.508			4918	4908	1578	3038		1826.85	1836.45	351.75	1654.75						36.1865	37.1718	29.8867	51.7221		38.7418	4.61786		257.508
2275	2314	2416	1769	1556		467.7	683.55	695.6	223.35	262.65					17.3978	30.2873	28.3339	22.9054	26.4663		25.0781	2.27345		258.733			4975	4986	1548	2939		1883.85	1914.45	321.75	1555.75						37.2246	38.5841	27.762	48.8078		38.0946	4.3063		258.733
2435	2286	2308	1808	1548		627.7	655.55	587.6	262.35	254.65					22.1725	29.17	24.4308	25.5405	25.8798		25.4387	1.13603		259.954			5187	5184	1567	3024		2095.85	2112.45	340.75	1640.75						41.0854	42.1691	29.1076	51.31		40.918	4.55587		259.954
2342	2335	2299	1904	1515		534.7	704.55	578.6	358.35	221.65					19.3972	31.1253	24.1055	32.027	23.4604		26.0231	2.41067		261.184			5063	5108	1545	2869		1971.85	2036.45	318.75	1485.75						38.8272	40.7931	27.5496	46.7471		38.4792	4.01342		261.184
2266	2325	2401	1855	1568		458.7	694.55	680.6	309.35	274.65					17.1292	30.7263	27.7918	28.7162	27.346		26.3419	2.37533		262.405			4918	5164	1528	2854		1826.85	2092.45	301.75	1470.75						36.1865	41.807	26.3456	46.3056		37.6612	4.30242		262.405
2324	2271	2380	1873	1463		516.7	640.55	659.6	327.35	169.65					18.86	28.5714	27.0329	29.9324	19.6481		24.809	2.31707		263.631			5105	4945	1498	3091		2013.85	1873.45	271.75	1707.75						39.5921	37.8417	24.221	53.2823		38.7343	5.94288		263.631
2395	2282	2344	1808	1486		587.7	651.55	623.6	262.35	192.65					20.9788	29.0104	25.7318	25.5405	21.3343		24.5192	1.50602		264.856			5066	4984	1613	2928		1974.85	1912.45	386.75	1544.75						38.8818	38.5479	32.3654	48.484		39.5698	3.3277		264.856
2344	2398	2354	1879	1484		536.7	767.55	633.6	333.35	190.65					19.4569	33.6393	26.0932	30.3378	21.1877		26.143	2.67444		266.081			5121	5104	1468	3002		2029.85	2032.45	241.75	1618.75						39.8835	40.7206	22.0963	50.6624		38.3407	5.94241		266.081
2333	2237	2375	1864	1581		525.7	606.55	654.6	318.35	287.65					19.1286	27.2147	26.8522	29.3243	28.2991		26.1638	1.81136		267.303			5179	5066	1444	3016		2087.85	1994.45	217.75	1632.75						40.9397	40.0326	20.3966	51.0745		38.1108	6.41318		267.303
2327	2253	2273	1832	1496		519.7	622.55	552.6	286.35	202.65					18.9496	27.8532	23.1659	27.1622	22.0674		23.8396	1.6531		268.533			5208	4868	1580	2959		2116.85	1796.45	353.75	1575.75						41.4679	36.4476	30.0283	49.3965		39.3351	4.08998		268.533
2260	2253	2433	1844	1503		452.7	622.55	712.6	298.35	209.65					16.9502	27.8532	28.9483	27.973	22.5806		24.8611	2.27074		269.754			5219	5035	1500	2995		2127.85	1963.45	273.75	1611.75						41.6682	39.4713	24.3626	50.4563		38.9896	5.42249		269.754
2383	2250	2322	1901	1545		575.7	619.55	601.6	355.35	251.65					20.6207	27.7334	24.9368	31.8243	25.6598		26.155	1.83017		270.979			5139	5030	1561	3078		2047.85	1958.45	334.75	1694.75						40.2112	39.3808	28.6827	52.8996		40.2936	4.9545		270.979
2269	2320	2332	1811	1458		461.7	689.55	611.6	265.35	164.65					17.2187	30.5267	25.2982	25.7432	19.2815		23.6137	2.3961		272.204			5127	5114	1479	2870		2035.85	2042.45	252.75	1486.75						39.9927	40.9017	22.8754	46.7766		37.6366	5.14495		272.204
2300	2314	2239	1820	1577		492.7	683.55	518.6	274.35	283.65					18.1438	30.2873	21.9371	26.3514	28.0059		24.9451	2.18163		273.426			4960	5066	1513	2972		1868.85	1994.45	286.75	1588.75						36.9514	40.0326	25.2833	49.7792		38.0116	5.04724		273.426
2347	2293	2302	1817	1486		539.7	662.55	581.6	271.35	192.65					19.5464	29.4493	24.214	26.1486	21.3343		24.1385	1.74931		274.647			5041	5056	1554	2899		1949.85	1984.45	327.75	1515.75						38.4265	39.8515	28.187	47.6303		38.5238	3.99531		274.647
2396	2265	2315	1868	1550		588.7	634.55	594.6	322.35	256.65					21.0087	28.332	24.6838	29.5946	26.0264		25.9291	1.49968		275.875			5199	5097	1499	3150		2107.85	2025.45	272.75	1766.75						41.304	40.5939	24.2918	55.0191		40.3022	6.28497		275.875
2385	2271	2281	1846	1528		577.7	640.55	560.6	300.35	234.65					20.6804	28.5714	23.455	28.1081	24.4135		25.0457	1.47978		277.096			5263	5078	1576	2989		2171.85	2006.45	349.75	1605.75						42.4695	40.2499	29.745	50.2797		40.686	4.23393		277.096
2251	2322	2502	1931	1570		443.7	691.55	781.6	385.35	276.65					16.6816	30.6065	31.442	33.8514	27.4927		28.0148	3.01034		278.322			5132	5115	1556	3057		2040.85	2043.45	329.75	1673.75						40.0838	40.9198	28.3286	52.2814		40.4034	4.89265		278.322
2316	2269	2277	1714	1507		508.7	638.55	556.6	168.35	213.65					18.6213	28.4916	23.3104	19.1892	22.8739		22.4973	1.77062		279.546			5142	5112	1574	2858		2050.85	2040.45	347.75	1474.75						40.2659	40.8655	29.6034	46.4233		39.2895	3.51365		279.546
2384	2408	2332	1696	1514		576.7	777.55	611.6	150.35	220.65					20.6506	34.0383	25.2982	17.973	23.3871		24.2694	2.7387		280.771			4985	5034	1588	3051		1893.85	1962.45	361.75	1667.75						37.4067	39.4532	30.5949	52.1048		39.8899	4.49034		280.771
2330	2295	2418	1873	1520		522.7	664.55	697.6	327.35	226.65					19.0391	29.5291	28.4062	29.9324	23.827		26.1468	2.08299		281.992			5259	5051	1579	2927		2167.85	1979.45	352.75	1543.75						42.3967	39.761	29.9575	48.4545		40.1424	3.85195		281.992
2385	2245	2332	1799	1566		577.7	614.55	611.6	253.35	272.65					20.6804	27.5339	25.2982	24.9324	27.1994		25.1289	1.22327		283.221			5079	4943	1561	2980		1987.85	1871.45	334.75	1596.75						39.1186	37.8055	28.6827	50.0147		38.9054	4.37012		283.221
2329	2297	2360	1853	1504		521.7	666.55	639.6	307.35	210.65					19.0093	29.6089	26.3101	28.5811	22.654		25.2327	1.96093		284.441			5221	5061	1545	2993		2129.85	1989.45	318.75	1609.75						41.7046	39.9421	27.5496	50.3974		39.8984	4.70803		284.441
2377	2302	2359	1845	1538		569.7	671.55	638.6	299.35	244.65					20.4417	29.8085	26.2739	28.0405	25.1466		25.9422	1.58666		285.667			5141	5105	1516	3078		2049.85	2033.45	289.75	1694.75						40.2477	40.7387	25.4958	52.8996		39.8454	5.60718		285.667
2346	2320	2358	1766	1505		538.7	689.55	637.6	220.35	211.65					19.5166	30.5267	26.2378	22.7027	22.7273		24.3422	1.87649		286.89			5075	5122	1605	2868		1983.85	2050.45	378.75	1484.75						39.0457	41.0465	31.7989	46.7177		39.6522	3.08096		286.89
2372	2305	2369	1827	1590		564.7	674.55	648.6	281.35	296.65					20.2925	29.9282	26.6353	26.8243	28.9589		26.5278	1.68006		288.116			5127	5193	1530	3054		2035.85	2121.45	303.75	1670.75						39.9927	42.3321	26.4872	52.1931		40.2513	5.29506		288.116
2276	2385	2373	1878	1496		468.7	754.55	652.6	332.35	202.65					17.4276	33.1205	26.7799	30.2703	22.0674		25.9332	2.8149		289.339			5273	5101	1611	3005		2181.85	2029.45	384.75	1621.75						42.6516	40.6663	32.2238	50.7507		41.5731	3.80375		289.339
2358	2361	2437	1878	1518		550.7	730.55	716.6	332.35	224.65					19.8747	32.1628	29.0929	30.2703	23.6804		27.0162	2.27507		290.567			5249	5048	1504	2988		2157.85	1976.45	277.75	1604.75						42.2145	39.7067	24.6459	50.2502		39.2043	5.34847		290.567
2285	2245	2397	1820	1524		477.7	614.55	676.6	274.35	230.65					17.6962	27.5339	27.6473	26.3514	24.1202		24.6698	1.85512		291.788			5224	5015	1516	3041		2132.85	1943.45	289.75	1657.75						41.7592	39.1092	25.4958	51.8104		39.5436	5.42306		291.788
2406	2248	2265	1824	1535		598.7	617.55	544.6	278.35	241.65					21.3071	27.6536	22.8768	26.6216	24.9267		24.6772	1.16836		293.015			5038	5251	1543	2946		1946.85	2179.45	316.75	1562.75						38.3719	43.3822	27.4079	49.0138		39.544	4.59227		293.015
2330	2343	2456	1805	1493		522.7	712.55	735.6	259.35	199.65					19.0391	31.4445	29.7795	25.3378	21.8475		25.4897	2.33197		294.239			5123	5205	1482	2930		2031.85	2133.45	255.75	1546.75						39.9199	42.5493	23.0878	48.5428		38.525	5.45286		294.239
2331	2344	2340	1820	1459		523.7	713.55	619.6	274.35	165.65					19.0689	31.4844	25.5873	26.3514	19.3548		24.3694	2.33748		295.464			5348	5140	1592	3009		2256.85	2068.45	365.75	1625.75						44.0175	41.3724	30.8782	50.8684		41.7841	4.14951		295.464
2388	2325	2385	1864	1429		580.7	694.55	664.6	318.35	135.65					20.7699	30.7263	27.2136	29.3243	17.1554		25.0379	2.60589		296.688			4994	5222	1564	2953		1902.85	2150.45	337.75	1569.75						37.5706	42.8571	28.8952	49.2199		39.6357	4.29979		296.688
2269	2258	2390	1831	1517		461.7	627.55	669.6	285.35	223.65					17.2187	28.0527	27.3943	27.0946	23.607		24.6735	2.01735		297.917			5035	5066	1480	2995		1943.85	1994.45	253.75	1611.75						38.3173	40.0326	22.9462	50.4563		37.9381	5.67152		297.917
2392	2331	2354	1750	1512		584.7	700.55	633.6	204.35	218.65					20.8893	30.9657	26.0932	21.6216	23.2405		24.5621	1.83348		299.138			5375	5088	1539	2838		2283.85	2016.45	312.75	1454.75						44.5092	40.4309	27.1246	45.8346		39.4748	4.27427		299.138
2434	2226	2394	1802	1648		626.7	595.55	673.6	256.35	354.65					22.1426	26.7757	27.5389	25.1351	33.2111		26.9607	1.81635		300.363			5140	5104	1564	2954		2048.85	2032.45	337.75	1570.75						40.2295	40.7206	28.8952	49.2493		39.7737	4.17567		300.363
2334	2305	2417	1774	1578		526.7	674.55	696.6	228.35	284.65					19.1585	29.9282	28.3701	23.2432	28.0792		25.7558	1.99348		301.586			5081	5314	1518	2998		1989.85	2242.45	291.75	1614.75						39.155	44.5229	25.6374	50.5446		39.965	5.31224		301.586
2285	2320	2363	1832	1488		477.7	689.55	642.6	286.35	194.65					17.6962	30.5267	26.4185	27.1622	21.4809		24.6569	2.26244		302.811			5269	5129	1541	2970		2177.85	2057.45	314.75	1586.75						42.5788	41.1733	27.2663	49.7203		40.1847	4.69506		302.811
2282	2325	2339	1845	1464		474.7	694.55	618.6	299.35	170.65					17.6067	30.7263	25.5511	28.0405	19.7214		24.3292	2.47602		304.032			5194	5106	1528	3111		2102.85	2034.45	301.75	1727.75						41.2129	40.7568	26.3456	53.8711		40.5466	5.62507		304.032
2340	2271	2386	1829	1608		532.7	640.55	665.6	283.35	314.65					19.3375	28.5714	27.2497	26.9595	30.2786		26.4793	1.87937		305.26			5085	5229	1501	3161		1993.85	2157.45	274.75	1777.75						39.2278	42.9839	24.4334	55.343		40.497	6.36551		305.26
2296	2341	2325	1829	1479		488.7	710.55	604.6	283.35	185.65					18.0245	31.3647	25.0452	26.9595	20.8211		24.443	2.33368		306.487			5226	4922	1596	2954		2134.85	1850.45	369.75	1570.75						41.7957	37.4253	31.1615	49.2493		39.9079	3.8023		306.487
2292	2273	2341	1730	1549		484.7	642.55	620.6	184.35	255.65					17.9051	28.6512	25.6234	20.2703	25.9531		23.6806	1.98283		307.712			5187	5329	1514	3115		2095.85	2257.45	287.75	1731.75						41.0854	44.7945	25.3541	53.9888		41.3057	5.96891		307.712
2307	2277	2422	1801	1513		499.7	646.55	701.6	255.35	219.65					18.3527	28.8109	28.5508	25.0676	23.3138		24.8191	1.92355		308.937			5214	5027	1447	3078		2122.85	1955.45	220.75	1694.75						41.5771	39.3265	20.6091	52.8996		38.6031	6.69293		308.937
2399	2265	2309	1812	1562		591.7	634.55	588.6	266.35	268.65					21.0982	28.332	24.4669	25.8108	26.9062		25.3228	1.23249		310.158			5098	4912	1541	2985		2006.85	1840.45	314.75	1601.75						39.4646	37.2443	27.2663	50.1619		38.5343	4.69662		310.158
2407	2351	2245	1836	1524		599.7	720.55	524.6	290.35	230.65					21.3369	31.7638	22.154	27.4324	24.1202		25.3615	1.91447		311.38			5294	5189	1549	3206		2202.85	2117.45	322.75	1822.75						43.0341	42.2596	27.8329	56.6677		42.4486	5.88911		311.38
2357	2287	2352	1787	1587		549.7	656.55	631.6	241.35	293.65					19.8448	29.2099	26.021	24.1216	28.739		25.5873	1.70834		312.609			4987	4961	1565	3023		1895.85	1889.45	338.75	1639.75						37.4431	38.1315	28.966	51.2805		38.9553	4.60672		312.609
2261	2257	2404	1869	1457		453.7	626.55	683.6	323.35	163.65					16.98	28.0128	27.9003	29.6622	19.2082		24.3527	2.59802		313.829			5212	5004	1521	3017		2120.85	1932.45	294.75	1633.75						41.5407	38.91	25.8499	51.1039		39.3511	5.20738		313.829
2284	2283	2367	1879	1547		476.7	652.55	646.6	333.35	253.65					17.6664	29.0503	26.5631	30.3378	25.8065		25.8848	2.212		315.052			5107	5213	1593	3041		2015.85	2141.45	366.75	1657.75						39.6285	42.6942	30.949	51.8104		41.2705	4.30451		315.052
2275	2323	2315	1846	1468		467.7	692.55	594.6	300.35	174.65					17.3978	30.6464	24.6838	28.1081	20.0147		24.1702	2.45812		316.276			5060	5191	1523	3041		1968.85	2119.45	296.75	1657.75						38.7725	42.2959	25.9915	51.8104		39.7176	5.33996		316.276
2363	2364	2406	1842	1527		555.7	733.55	685.6	296.35	233.65					20.0239	32.2825	27.9725	27.8378	24.3402		26.4914	2.0494		317.497			5438	5284	1528	2998		2346.85	2212.45	301.75	1614.75						45.6565	43.9797	26.3456	50.5446		41.6316	5.28218		317.497
2294	2281	2401	1784	1497		486.7	650.55	680.6	238.35	203.65					17.9648	28.9705	27.7918	23.9189	22.1408		24.1574	1.98553		318.718			5359	4946	1553	3090		2267.85	1874.45	326.75	1706.75						44.2178	37.8599	28.1162	53.2529		40.8617	5.29359		318.718
2386	2331	2315	1837	1543		578.7	700.55	594.6	291.35	249.65					20.7102	30.9657	24.6838	27.5	25.5132		25.8746	1.68494		319.946			4884	5054	1542	3014		1792.85	1982.45	315.75	1630.75						35.5673	39.8153	27.3371	51.0156		38.4338	4.9292		319.946
2348	2316	2433	1841	1568		540.7	685.55	712.6	295.35	274.65					19.5762	30.3671	28.9483	27.7703	27.346		26.8016	1.88098		321.167			5216	5221	1547	3082		2124.85	2149.45	320.75	1698.75						41.6135	42.839	27.6912	53.0174		41.2903	5.20386		321.167
2367	2294	2376	1747	1476		559.7	663.55	655.6	201.35	182.65					20.1432	29.4892	26.8883	21.4189	20.6012		23.7082	1.88596		322.393			5468	5223	1534	3105		2376.85	2151.45	307.75	1721.75						46.2029	42.8753	26.7705	53.6944		42.3858	5.67547		322.393
2354	2366	2401	1791	1513		546.7	735.55	680.6	245.35	219.65					19.7553	32.3623	27.7918	24.3919	23.3138		25.523	2.13718		323.618			5154	5018	1482	3081		2062.85	1946.45	255.75	1697.75						40.4844	39.1635	23.0878	52.9879		38.9309	6.13101		323.618
2281	2221	2415	1807	1543		473.7	590.55	694.6	261.35	249.65					17.5768	26.5762	28.2978	25.473	25.5132		24.6874	1.85016		324.839			5062	5222	1599	3090		1970.85	2150.45	372.75	1706.75						38.809	42.8571	31.3739	53.2529		41.5732	4.56188		324.839
2344	2315	2297	1828	1559		536.7	684.55	576.6	282.35	265.65					19.4569	30.3272	24.0332	26.8919	26.6862		25.4791	1.80714		326.06			5116	5324	1562	3033		2024.85	2252.45	335.75	1649.75						39.7924	44.704	28.7535	51.5749		41.2062	4.80288		326.06
2356	2305	2327	1881	1531		548.7	674.55	606.6	335.35	237.65					19.815	29.9282	25.1175	30.473	24.6334		25.9934	1.9537		327.289			5105	5231	1595	3119		2013.85	2159.45	368.75	1735.75						39.5921	43.0201	31.0907	54.1066		41.9523	4.76456		327.289
2294	2345	2418	1840	1522		486.7	714.55	697.6	294.35	228.65					17.9648	31.5243	28.4062	27.7027	23.9736		25.9143	2.32209		328.51			5109	5197	1561	3082		2017.85	2125.45	334.75	1698.75						39.6649	42.4045	28.6827	53.0174		40.9424	4.99895		328.51
2348	2336	2445	1829	1565		540.7	705.55	724.6	283.35	271.65					19.5762	31.1652	29.382	26.9595	27.1261		26.8418	1.97519		329.738			5364	5362	1556	3079		2272.85	2290.45	329.75	1695.75						44.3089	45.392	28.3286	52.9291		42.7396	5.17204		329.738
2372	2353	2421	1806	1631		564.7	722.55	700.6	260.35	337.65					20.2925	31.8436	28.5146	25.4054	31.9648		27.6042	2.19217		330.961			5219	4960	1531	3111		2127.85	1888.45	304.75	1727.75						41.6682	38.1133	26.5581	53.8711		40.0527	5.62304		330.961
2374	2316	2363	1756	1592		566.7	685.55	642.6	210.35	298.65					20.3521	30.3671	26.4185	22.027	29.1056		25.6541	1.94905		332.183			5126	5180	1521	3018		2034.85	2108.45	294.75	1634.75						39.9745	42.0967	25.8499	51.1334		39.7636	5.23093		332.183
2340	2362	2334	1815	1533		532.7	731.55	613.6	269.35	239.65					19.3375	32.2027	25.3704	26.0135	24.7801		25.5408	2.04564		333.404			5163	5090	1522	3022		2071.85	2018.45	295.75	1638.75						40.6483	40.4671	25.9207	51.2511		39.5718	5.20192		333.404
2339	2273	2304	1863	1584		531.7	642.55	583.6	317.35	290.65					19.3077	28.6512	24.2862	29.2568	28.5191		26.0042	1.89348		334.631			5317	5030	1580	3048		2225.85	1958.45	353.75	1664.75						43.4529	39.3808	30.0283	52.0165		41.2196	4.56606		334.631
2444	2356	2457	1792	1593		636.7	725.55	736.6	246.35	299.65					22.4411	31.9633	29.8157	24.4595	29.1789		27.5717	1.77361		335.853			5289	5136	1555	2975		2197.85	2064.45	328.75	1591.75						42.943	41.3	28.2578	49.8675		40.5921	4.51107		335.853
2369	2225	2371	1811	1628		561.7	594.55	650.6	265.35	334.65					20.2029	26.7358	26.7076	25.7432	31.7449		26.2269	1.83658		337.078			5424	5134	1559	3042		2332.85	2062.45	332.75	1658.75						45.4016	41.2638	28.5411	51.8399		41.7616	4.91469		337.078
2297	2341	2336	1878	1510		489.7	710.55	615.6	332.35	216.65					18.0543	31.3647	25.4427	30.2703	23.0938		25.6452	2.43183		338.305			5042	5090	1523	3044		1950.85	2018.45	296.75	1660.75						38.4447	40.4671	25.9915	51.8987		39.2005	5.30643		338.305
2375	2318	2370	1818	1463		567.7	687.55	649.6	272.35	169.65					20.382	30.4469	26.6715	26.2162	19.6481		24.6729	2.04177		339.53			5421	5199	1652	3051		2329.85	2127.45	425.75	1667.75						45.3469	42.4407	35.1275	52.1048		43.755	3.5168		339.53
2290	2213	2374	1843	1545		482.7	582.55	653.6	297.35	251.65					17.8454	26.257	26.816	27.9054	25.6598		24.8967	1.80124		340.751			5072	5180	1526	3124		1980.85	2108.45	299.75	1740.75						38.9911	42.0967	26.204	54.2537		40.3864	5.76134		340.751
2373	2353	2361	1840	1559		565.7	722.55	640.6	294.35	265.65					20.3223	31.8436	26.3462	27.7027	26.6862		26.5802	1.84649		341.98			5215	5027	1602	3039		2123.85	1955.45	375.75	1655.75						41.5953	39.3265	31.5864	51.7516		41.0649	4.15682		341.98
2353	2355	2354	1800	1477		545.7	724.55	633.6	254.35	183.65					19.7255	31.9234	26.0932	25	20.6745		24.6833	2.18126		343.202			5365	5438	1619	2989		2273.85	2366.45	392.75	1605.75						44.3271	46.7681	32.7904	50.2797		43.5413	3.78613		343.202
2381	2344	2353	1857	1522		573.7	713.55	632.6	311.35	228.65					20.561	31.4844	26.0571	28.8514	23.9736		26.1855	1.89379		344.426			5216	5093	1530	3126		2124.85	2021.45	303.75	1742.75						41.6135	40.5215	26.4872	54.3126		40.7337	5.68747		344.426
2293	2463	2400	1865	1483		485.7	832.55	679.6	319.35	189.65					17.9349	36.233	27.7557	29.3919	21.1144		26.486	3.21742		345.651			5226	5163	1576	3039		2134.85	2091.45	349.75	1655.75						41.7957	41.7889	29.745	51.7516		41.2703	4.50216		345.651
2393	2342	2383	1786	1463		585.7	711.55	662.6	240.35	169.65					20.9191	31.4046	27.1413	24.0541	19.6481		24.6334	2.13452		346.873			5263	5176	1571	3038		2171.85	2104.45	344.75	1654.75						42.4695	42.0243	29.3909	51.7221		41.4017	4.58528		346.873
2395	2250	2294	1791	1493		587.7	619.55	573.6	245.35	199.65					20.9788	27.7334	23.9248	24.3919	21.8475		23.7753	1.17486		348.094			5153	4970	1607	2951		2061.85	1898.45	380.75	1567.75						40.4662	38.2944	31.9405	49.161		39.9655	3.55904		348.094
2334	2225	2311	1800	1451		526.7	594.55	590.6	254.35	157.65					19.1585	26.7358	24.5392	25	18.7683		22.8404	1.62577		349.323			5104	5201	1451	3147		2012.85	2129.45	224.75	1763.75						39.5739	42.4769	20.8924	54.9308		39.4685	7.03099		349.323
2333	2351	2383	1828	1477		525.7	720.55	662.6	282.35	183.65					19.1286	31.7638	27.1413	26.8919	20.6745		25.12	2.31327		350.545			5204	5070	1608	3063		2112.85	1998.45	381.75	1679.75						41.395	40.105	32.0113	52.4581		41.4924	4.20387		350.545
2419	2342	2373	1800	1473		611.7	711.55	652.6	254.35	179.65					21.695	31.4046	26.7799	25	20.3812		25.0522	1.95486		351.771			5111	5006	1542	3040		2019.85	1934.45	315.75	1656.75						39.7013	38.9462	27.3371	51.781		39.4414	4.99243		351.771
2274	2376	2331	1792	1443		466.7	745.55	610.6	246.35	149.65					17.3679	32.7614	25.262	24.4595	18.1818		23.6065	2.7895		352.995			5265	5245	1582	3049		2173.85	2173.45	355.75	1665.75						42.5059	43.2736	30.17	52.0459		41.9988	4.49767		352.995
2341	2387	2286	1787	1493		533.7	756.55	565.6	241.35	199.65					19.3674	33.2003	23.6357	24.1216	21.8475		24.4345	2.34461		354.22			5272	5124	1571	3140		2180.85	2052.45	344.75	1756.75						42.6334	41.0827	29.3909	54.7248		41.958	5.18125		354.22
2388	2339	2383	1840	1581		580.7	708.55	662.6	294.35	287.65					20.7699	31.2849	27.1413	27.7027	28.2991		27.0396	1.72291		355.441			5384	5287	1525	3174		2292.85	2215.45	298.75	1790.75						44.6731	44.034	26.1331	55.7256		42.6415	6.12228		355.441
2365	2288	2337	2024	1546		557.7	657.55	616.6	478.35	252.65					20.0836	29.2498	25.4789	40.1351	25.7331		28.1361	3.33838		356.67			5255	5200	1560	3021		2163.85	2128.45	333.75	1637.75						42.3238	42.4588	28.6119	51.2217		41.154	4.67024		356.67
2402	2287	2394	1813	1603		594.7	656.55	673.6	267.35	309.65					21.1877	29.2099	27.5389	25.8784	29.912		26.7454	1.55516		357.891			5264	5286	1484	3066		2172.85	2214.45	257.75	1682.75						42.4877	44.0159	23.2295	52.5464		40.5699	6.18924		357.891
2281	2296	2306	1778	1506		473.7	665.55	585.6	232.35	212.65					17.5768	29.569	24.3585	23.5135	22.8006		23.5637	1.91211		359.116			5149	5212	1493	3043		2057.85	2140.45	266.75	1659.75						40.3934	42.6761	23.8669	51.8693		39.7014	5.83179		359.116
2373	2304	2295	1866	1558		565.7	673.55	574.6	320.35	264.65					20.3223	29.8883	23.961	29.4595	26.6129		26.0488	1.78668		360.342			5325	5218	1632	3081		2233.85	2146.45	405.75	1697.75						43.5986	42.7847	33.7111	52.9879		43.2706	3.93865		360.342
2402	2301	2380	1814	1506		594.7	670.55	659.6	268.35	212.65					21.1877	29.7686	27.0329	25.9459	22.8006		25.3471	1.52537		361.568			5168	5110	1514	3040		2076.85	2038.45	287.75	1656.75						40.7394	40.8293	25.3541	51.781		39.6759	5.43222		361.568
2376	2352	2329	1841	1474		568.7	721.55	608.6	295.35	180.65					20.4118	31.8037	25.1897	27.7703	20.4545		25.126	2.1867		362.786			5175	5174	1507	3150		2083.85	2102.45	280.75	1766.75						40.8669	41.9881	24.8584	55.0191		40.6831	6.17576		362.786
2330	2251	2337	1806	1514		522.7	620.55	616.6	260.35	220.65					19.0391	27.7733	25.4789	25.4054	23.3871		24.2168	1.46887		364.011			5173	5262	1576	2995		2081.85	2190.45	349.75	1611.75						40.8304	43.5814	29.745	50.4563		41.1533	4.30788		364.011
2358	2302	2350	1811	1525		550.7	671.55	629.6	265.35	231.65					19.8747	29.8085	25.9487	25.7432	24.1935		25.1137	1.60357		365.234			5111	5414	1579	3100		2019.85	2342.45	352.75	1716.75						39.7013	46.3335	29.9575	53.5472		42.3849	5.01524		365.234
2448	2331	2307	1903	1529		640.7	700.55	586.6	357.35	235.65					22.5604	30.9657	24.3947	31.9595	24.4868		26.8734	1.91124		366.46			5132	5330	1534	3084		2040.85	2258.45	307.75	1700.75						40.0838	44.8126	26.7705	53.0762		41.1858	5.50417		366.46
2406	2283	2311	1787	1468		598.7	652.55	590.6	241.35	174.65					21.3071	29.0503	24.5392	24.1216	20.0147		23.8066	1.56139		367.681			5430	5087	1520	3089		2338.85	2015.45	293.75	1705.75						45.5108	40.4128	25.779	53.2234		41.2315	5.78481		367.681
2381	2253	2382	1814	1479		573.7	622.55	661.6	268.35	185.65					20.561	27.8532	27.1052	25.9459	20.8211		24.4573	1.56783		368.906			5262	5195	1599	3138		2170.85	2123.45	372.75	1754.75						42.4513	42.3683	31.3739	54.6659		42.7148	4.75774		368.906
2410	2366	2313	1851	1519		602.7	735.55	592.6	305.35	225.65					21.4264	32.3623	24.6115	28.4459	23.7537		26.12	1.92719		370.128			5088	5078	1595	3093		1996.85	2006.45	368.75	1709.75						39.2825	40.2499	31.0907	53.3412		40.991	4.60084		370.128
2331	2312	2369	1903	1479		523.7	681.55	648.6	357.35	185.65					19.0689	30.2075	26.6353	31.9595	20.8211		25.7385	2.53121		371.357			5431	5031	1569	3165		2339.85	1959.45	342.75	1781.75						45.529	39.3989	29.2493	55.4607		42.4095	5.49485		371.357
2446	2344	2454	1817	1540		638.7	713.55	733.6	271.35	246.65					22.5007	31.4844	29.7073	26.1486	25.2933		27.0269	1.60183		372.578			5376	5344	1574	2897		2284.85	2272.45	347.75	1513.75						44.5274	45.0661	29.6034	47.5714		41.6921	4.08376		372.578
2340	2302	2308	1785	1562		532.7	671.55	587.6	239.35	268.65					19.3375	29.8085	24.4308	23.9865	26.9062		24.8939	1.73369		373.803			5303	5159	1586	2973		2211.85	2087.45	359.75	1589.75						43.198	41.7165	30.4533	49.8087		41.2941	4.01896		373.803
2288	2286	2347	1858	1495		480.7	655.55	626.6	312.35	201.65					17.7857	29.17	25.8403	28.9189	21.9941		24.7418	2.17026		375.026			5152	5152	1553	3105		2060.85	2080.45	326.75	1721.75						40.448	41.5897	28.1162	53.6944		40.9621	5.22645		375.026
2310	2350	2339	1838	1565		502.7	719.55	618.6	292.35	271.65					18.4423	31.7239	25.5511	27.5676	27.1261		26.0822	2.16535		376.251			5497	5184	1509	3058		2405.85	2112.45	282.75	1674.75						46.731	42.1691	25	52.3109		41.5527	5.89438		376.251
2367	2280	2301	1842	1474		559.7	649.55	580.6	296.35	180.65					20.1432	28.9306	24.1778	27.8378	20.4545		24.3088	1.81713		377.472			5227	5275	1531	2963		2135.85	2203.45	304.75	1579.75						41.8139	43.8168	26.5581	49.5143		40.4258	4.90187		377.472
2422	2369	2340	1778	1528		614.7	738.55	619.6	232.35	234.65					21.7845	32.482	25.5873	23.5135	24.4135		25.5562	1.83946		378.697			5314	5274	1558	2967		2222.85	2202.45	331.75	1583.75						43.3983	43.7987	28.4703	49.632		41.3248	4.51543		378.697
2323	2345	2362	1904	1541		515.7	714.55	641.6	358.35	247.65					18.8302	31.5243	26.3824	32.027	25.3666		26.8261	2.40192		379.918			5288	5132	1539	3127		2196.85	2060.45	312.75	1743.75						42.9248	41.2276	27.1246	54.3421		41.4048	5.58		379.918
2319	2318	2358	1759	1535		511.7	687.55	637.6	213.35	241.65					18.7108	30.4469	26.2378	22.2297	24.9267		24.5104	1.96515		381.145			5155	5341	1557	3058		2063.85	2269.45	330.75	1674.75						40.5026	45.0118	28.3994	52.3109		41.5562	5.0151		381.145
2354	2296	2407	1762	1517		546.7	665.55	686.6	216.35	223.65					19.7553	29.569	28.0087	22.4324	23.607		24.6745	1.80884		382.37			5261	5259	1583	2991		2169.85	2187.45	356.75	1607.75						42.4331	43.5271	30.2408	50.3385		41.6349	4.18127		382.37
2337	2421	2463	1823	1574		529.7	790.55	742.6	277.35	280.65					19.248	34.5571	30.0325	26.5541	27.7859		27.6355	2.50196		383.595			5097	5246	1566	3185		2005.85	2174.45	339.75	1801.75						39.4464	43.2917	29.0368	56.0495		41.9561	5.57982		383.595
2378	2289	2375	1787	1477		570.7	658.55	654.6	241.35	183.65					20.4715	29.2897	26.8522	24.1216	20.6745		24.2819	1.72109		384.816			5482	5267	1567	3133		2390.85	2195.45	340.75	1749.75						46.4578	43.6719	29.1076	54.5187		43.439	5.30185		384.816
2392	2412	2410	1874	1545		584.7	781.55	689.6	328.35	251.65					20.8893	34.1979	28.1171	30	25.6598		27.7728	2.21595		386.045			5174	5155	1530	3098		2082.85	2083.45	303.75	1714.75						40.8487	41.644	26.4872	53.4884		40.6171	5.52593		386.045
2421	2370	2403	1849	1473		613.7	739.55	682.6	303.35	179.65					21.7547	32.5219	27.8641	28.3108	20.3812		26.1666	2.24505		387.267			5073	5135	1628	3062		1981.85	2063.45	401.75	1678.75						39.0093	41.2819	33.4278	52.4286		41.5369	3.98791		387.267
2388	2298	2420	1826	1485		580.7	667.55	699.6	280.35	191.65					20.7699	29.6488	28.4785	26.7568	21.261		25.383	1.84307		388.493			5072	5162	1541	3150		1980.85	2090.45	314.75	1766.75						38.9911	41.7708	27.2663	55.0191		40.7618	5.69761		388.493
2334	2379	2327	1740	1552		526.7	748.55	606.6	194.35	258.65					19.1585	32.8811	25.1175	20.9459	26.173		24.8552	2.387		389.717			5456	5145	1637	3205		2364.85	2073.45	410.75	1821.75						45.9843	41.463	34.0652	56.6382		44.5377	4.72267		389.717
4845	4061	3883	2810	1545		3037.7	2430.55	2162.6	1264.35	251.65					94.0913	100	81.3516	93.2432	25.6598		78.8692	13.6423		411.663			5280	7604	2410	4678		2188.85	4532.45	1183.75	3294.75						42.7791	85.9859	88.8102	100		79.3938	12.5744		411.663
4687	3650	3452	2618	1491		2879.7	2019.55	1731.6	1072.35	197.65					89.3763	83.5994	65.7752	80.2703	21.7009		68.1444	12.246		412.884			5463	7283	2292	4518		2371.85	4211.45	1065.75	3134.75						46.1118	80.1738	80.4533	95.29		75.5072	10.4151		412.884
4353	3578	3517	2467	1539		2545.7	1947.55	1796.6	921.35	245.65					79.4091	80.7263	68.1243	70.0676	25.2199		64.7094	10.1794		414.109			5326	6948	2274	4349		2234.85	3876.45	1047.75	2965.75						43.6168	74.1083	79.1785	90.315		71.8046	9.98693		414.109
4601	3619	3478	2609	1502		2793.7	1988.55	1757.6	1063.35	208.65					86.8099	82.3623	66.7149	79.6622	22.5073		67.6113	11.7613		415.332			5054	7119	2042	4386		1962.85	4047.45	815.75	3002.75						38.6633	77.2044	62.7479	91.4042		67.5049	11.2536		415.332
4539	3685	3541	2603	1506		2731.7	2054.55	1820.6	1057.35	212.65					84.9597	84.996	68.9917	79.2568	22.8006		68.201	11.7196		416.56			5235	7540	2138	4348		2143.85	4468.45	911.75	2964.75						41.9596	84.8271	69.5467	90.2856		71.6547	10.8277		416.56
4327	3770	3535	2640	1552		2519.7	2139.55	1814.6	1094.35	258.65					78.6332	88.3879	68.7748	81.7568	26.173		68.7451	11.1025		417.78			5326	7386	2043	4290		2234.85	4314.45	816.75	2906.75						43.6168	82.0387	62.8187	88.5782		69.2631	10.147		417.78
4446	3725	3725	2681	1521		2638.7	2094.55	2004.6	1135.35	227.65					82.1844	86.5922	75.6415	84.527	23.9003		70.5691	11.8114		419.01			5238	7373	2064	4271		2146.85	4301.45	837.75	2887.75						42.0142	81.8034	64.3059	88.0188		69.0356	10.3114		419.01
4465	3628	3843	2668	1558		2657.7	1997.55	2122.6	1122.35	264.65					82.7514	82.7215	79.906	83.6486	26.6129		71.1281	11.1466		420.231			5217	7481	2112	4155		2125.85	4409.45	885.75	2771.75						41.6318	83.7588	67.7054	84.6041		69.425	10.0469		420.231
4431	3662	3789	2693	1494		2623.7	2031.55	2068.6	1147.35	200.65					81.7368	84.0782	77.9545	85.3378	21.9208		70.2056	12.1364		421.458			5276	7828	2171	4380		2184.85	4756.45	944.75	2996.75						42.7062	90.0416	71.8838	91.2275		73.9648	11.3207		421.458
4465	3665	3758	2744	1534		2657.7	2034.55	2037.6	1198.35	240.65					82.7514	84.1979	76.8341	88.7838	24.8534		71.4841	11.813		422.682			5201	7786	2169	4336		2109.85	4714.45	942.75	2952.75						41.3404	89.2812	71.7422	89.9323		73.074	11.3859		422.682
4560	3643	3912	2741	1533		2752.7	2012.55	2191.6	1195.35	239.65					85.5864	83.32	82.3997	88.5811	24.7801		72.9335	12.0855		423.907			5461	7780	2208	4220		2369.85	4708.45	981.75	2836.75						46.0754	89.1726	74.5042	86.5175		74.0674	9.86118		423.907
4517	3698	3880	2628	1576		2709.7	2067.55	2159.6	1082.35	282.65					84.3032	85.5148	81.2432	80.9459	27.9326		71.9879	11.0486		425.128			5318	7768	2175	4479		2226.85	4696.45	948.75	3095.75						43.4711	88.9553	72.1671	94.1419		74.6839	11.4122		425.128
4703	3788	3964	2619	1582		2895.7	2157.55	2243.6	1073.35	288.65					89.8538	89.1061	84.279	80.3378	28.3724		74.3898	11.6329		426.359			5245	7745	2147	4319		2153.85	4673.45	920.75	2935.75						42.1417	88.5388	70.1841	89.4318		72.5741	11.0714		426.359
4595	3717	3997	2670	1629		2787.7	2086.55	2276.6	1124.35	335.65					86.6309	86.2729	85.4716	83.7838	31.8182		74.7955	10.7555		427.579			5260	7653	2092	4258		2168.85	4581.45	865.75	2874.75						42.4149	86.8731	66.2889	87.6362		70.8033	10.6766		427.579
4514	3810	3878	2757	1537		2706.7	2179.55	2157.6	1211.35	243.65					84.2137	89.984	81.1709	89.6622	25.0733		74.0208	12.3498		428.805			5204	7791	2053	4188		2112.85	4719.45	826.75	2804.75						41.395	89.3717	63.5269	85.5755		69.9673	11.0981		428.805
4620	3751	4023	2620	1503		2812.7	2120.55	2302.6	1074.35	209.65					87.3769	87.6297	86.4113	80.4054	22.5806		72.8808	12.6441		430.029			5293	7733	2241	4120		2201.85	4661.45	1014.75	2736.75						43.0158	88.3216	76.8414	83.5737		72.9381	10.2484		430.029
4634	3666	3938	2780	1482		2826.7	2035.55	2217.6	1234.35	188.65					87.7947	84.2378	83.3394	91.2162	21.0411		73.5258	13.1952		431.257			5247	7681	2103	4269		2155.85	4609.45	876.75	2885.75						42.1781	87.38	67.068	87.96		71.1465	10.809		431.257
4670	3754	4077	2699	1565		2862.7	2123.55	2356.6	1153.35	271.65					88.869	87.7494	88.3628	85.7432	27.1261		75.5701	12.1226		432.476			5211	7651	2232	4538		2119.85	4579.45	1005.75	3154.75						41.5225	86.8369	76.204	95.8787		75.1105	11.896		432.476
4728	3764	3992	2757	1586		2920.7	2133.55	2271.6	1211.35	292.65					90.5998	88.1484	85.2909	89.6622	28.6657		76.4734	11.9857		433.708			5118	7682	2239	4392		2026.85	4610.45	1012.75	3008.75						39.8288	87.3982	76.6997	91.5808		73.8769	11.7739		433.708
4678	3783	4038	2741	1549		2870.7	2152.55	2317.6	1195.35	255.65					89.1077	88.9066	86.9534	88.5811	25.9531		75.9004	12.4926		434.93			5419	7575	2216	4370		2327.85	4503.45	989.75	2986.75						45.3105	85.4608	75.0708	90.9332		74.1938	10.1742		434.93
4760	3798	4077	2771	1534		2952.7	2167.55	2356.6	1225.35	240.65					91.5548	89.5052	88.3628	90.6081	24.8534		76.9769	13.0418		436.157			5515	7847	2134	4288		2423.85	4775.45	907.75	2904.75						47.0588	90.3857	69.2635	88.5193		73.8068	10.1136		436.157
4753	3876	4155	2796	1548		2945.7	2245.55	2434.6	1250.35	254.65					91.3459	92.6177	91.1818	92.2973	25.8798		78.6645	13.199		437.379			5294	7932	2132	4548		2202.85	4860.45	905.75	3164.75						43.0341	91.9247	69.1218	96.1731		75.0634	12.2171		437.379
4641	3864	3996	2722	1498		2833.7	2233.55	2275.6	1176.35	204.65					88.0036	92.1389	85.4355	87.2973	22.2141		75.0179	13.2463		438.602			5199	7859	2280	4487		2107.85	4787.45	1053.75	3103.75						41.304	90.6029	79.6034	94.3774		76.4719	12.1343		438.602
4828	3728	4114	2748	1462		3020.7	2097.55	2393.6	1202.35	168.65					93.584	86.7119	89.7	89.0541	19.5748		75.725	14.081		439.822			5262	8044	2157	4365		2170.85	4972.45	930.75	2981.75						42.4513	93.9526	70.8923	90.786		74.5205	11.8454		439.822
4656	3781	4081	2733	1572		2848.7	2150.55	2360.6	1187.35	278.65					88.4512	88.8268	88.5074	88.0405	27.6393		76.2931	12.1641		441.051			5184	7939	2252	4145		2092.85	4867.45	1025.75	2761.75						41.0308	92.0514	77.6204	84.3097		73.7531	11.2989		441.051
4670	3816	4033	2755	2559		2862.7	2185.55	2312.6	1209.35	1265.65					88.869	90.2235	86.7727	89.527	100		91.0784	2.30384		447.7			7979	7982	2284	4468		4887.85	4910.45	1057.75	3084.75						91.9322	92.83	79.8867	93.8181		89.6167	3.26613		447.7
4723	3685	3930	2812	2291		2915.7	2054.55	2209.6	1266.35	997.65					90.4506	84.996	83.0502	93.3784	80.3519		86.4454	2.39652		448.93			7831	7863	2320	4274		4739.85	4791.45	1093.75	2890.75						89.2369	90.6754	82.4363	88.1072		87.6139	1.80412		448.93
4690	3713	4132	2719	2304		2882.7	2082.55	2411.6	1173.35	1010.65					89.4658	86.1133	90.3506	87.0946	81.305		86.8659	1.58816		450.16			7418	7679	2218	4398		4326.85	4607.45	991.75	3014.75						81.7155	87.3438	75.2125	91.7574		84.0073	3.58002		450.16
4626	3797	4113	2811	2267		2818.7	2166.55	2392.6	1265.35	973.65					87.556	89.4653	89.6639	93.3108	78.5924		87.7177	2.46396		451.386			7126	7833	2265	4335		4034.85	4761.45	1038.75	2951.75						76.3977	90.1322	78.5411	89.9029		83.7435	3.64895		451.386
4688	3721	4110	2732	2321		2880.7	2090.55	2389.6	1186.35	1027.65					89.4061	86.4326	89.5555	87.973	82.5513		87.1837	1.28862		393.31			7548	8051	2293			4456.85	4979.45	1066.75							84.083	94.0793	80.5241			86.2288	4.05747		393.31
4687	3757	4056	2725	2329		2879.7	2126.55	2335.6	1179.35	1035.65					89.3763	87.8691	87.6039	87.5	83.1378		87.0974	1.04608		394.35			7539	7915	2292			4447.85	4843.45	1065.75							83.9191	91.6169	80.4533			85.3298	3.29894		394.35
4672	3759	4003	2878	2262		2864.7	2128.55	2282.6	1332.35	968.65					88.9287	87.9489	85.6885	97.8378	78.2258		87.7259	3.14762		395.385			7331	7771	2281			4239.85	4699.45	1054.75							80.1311	89.0096	79.6742			82.9383	3.03851		395.385
4814	3815	3960	2877	2264		3006.7	2184.55	2239.6	1331.35	970.65					93.1662	90.1836	84.1344	97.7703	78.3724		88.7254	3.40527		396.421			7573	7932	2253			4481.85	4860.45	1026.75							84.5383	91.9247	77.6912			84.7181	4.10983		396.421
4793	3735	4173	2887	2263		2985.7	2104.55	2452.6	1341.35	969.65					92.5395	86.9912	91.8323	98.4459	78.2991		89.6216	3.36443		397.459			7664	7914	2306			4572.85	4842.45	1079.75							86.1956	91.5988	81.4448			86.413	2.93323		397.459
4749	3816	4223	2708	2297		2941.7	2185.55	2502.6	1162.35	1003.65					91.2265	90.2235	93.6393	86.3514	80.7918		88.4465	2.24539		398.493			7578	7855	2300			4486.85	4783.45	1073.75							84.6294	90.5305	81.0198			85.3932	2.77193		398.493
4624	3740	4089	2794	2279		2816.7	2109.55	2368.6	1248.35	985.65					87.4963	87.1907	88.7965	92.1622	79.4721		87.0236	2.08355		399.528			7591	8153	2269			4499.85	5081.45	1042.75							84.8661	95.9261	78.8244			86.5389	5.0072		399.528
4748	3819	4182	2796	2269		2940.7	2188.55	2461.6	1250.35	975.65					91.1967	90.3432	92.1576	92.2973	78.739		88.9467	2.57629		400.568			7821	7873	2331			4729.85	4801.45	1104.75							89.0548	90.8564	83.2153			87.7088	2.30618		400.568
4800	3666	4229	2871	2259		2992.7	2035.55	2508.6	1325.35	965.65					92.7484	84.2378	93.8562	97.3649	78.0059		89.2426	3.5416		401.606			7790	7816	2331			4698.85	4744.45	1104.75							88.4903	89.8244	83.2153			87.1766	2.01777		401.606
4801	3785	4130	2820	2303		2993.7	2154.55	2409.6	1274.35	1009.65					92.7783	88.9864	90.2783	93.9189	81.2317		89.4387	2.23036		402.647			7723	8117	2386			4631.85	5045.45	1159.75							87.2701	95.2743	87.1105			89.885	2.69507		402.647
4717	3803	4136	2722	2298		2909.7	2172.55	2415.6	1176.35	1004.65					90.2716	89.7047	90.4951	87.2973	80.8651		87.7268	1.80719		403.684			7979	8167	2376			4887.85	5095.45	1149.75							91.9322	96.1796	86.4023			91.5047	2.83056		403.684
4757	3754	4062	2793	2316		2949.7	2123.55	2341.6	1247.35	1022.65					91.4652	87.7494	87.8207	92.0946	82.1848		88.2629	1.7655		404.729			7829	8332	2327			4737.85	5260.45	1100.75							89.2005	99.1671	82.932			90.4332	4.72703		404.729
4760	3678	4105	2754	2341		2952.7	2047.55	2384.6	1208.35	1047.65					91.5548	84.7167	89.3748	89.4595	84.0176		87.8247	1.46871		405.764			7636	8123	2328			4544.85	5051.45	1101.75							85.6857	95.3829	83.0028			88.0238	3.76018		405.764
4882	3721	4092	2820	2296		3074.7	2090.55	2371.6	1274.35	1002.65					95.1955	86.4326	88.905	93.9189	80.7185		89.0341	2.62448		406.804			7680	7956	2222			4588.85	4884.45	995.75							86.487	92.3592	75.4958			84.7807	4.94226		406.804
4753	3679	4235	2768	2306		2945.7	2048.55	2514.6	1222.35	1012.65					91.3459	84.7566	94.073	90.4054	81.4516		88.4065	2.30691		407.844			7854	7917	2301			4762.85	4845.45	1074.75							89.6558	91.6531	81.0906			87.4665	3.23965		407.844
4717	3823	4004	2699	2291		2909.7	2192.55	2283.6	1153.35	997.65					90.2716	90.5028	85.7246	85.7432	80.3519		86.5188	1.86035		408.878			7725	8064	2339			4633.85	4992.45	1112.75							87.3065	94.3147	83.7819			88.4677	3.0955		408.878
4656	3736	4092	2813	2397		2848.7	2105.55	2371.6	1267.35	1103.65					88.4512	87.0311	88.905	93.4459	88.1232		89.1913	1.10768		409.916			7792	8343	2279			4700.85	5271.45	1052.75							88.5267	99.3663	79.5326			89.1418	5.73375		409.916
4722	3873	4134	2779	2280		2914.7	2242.55	2413.6	1233.35	986.65					90.4208	92.498	90.4228	91.1486	79.5455		88.8071	2.34626		410.957			7725	8073	2365			4633.85	5001.45	1138.75							87.3065	94.4776	85.6232			89.1358	2.71477		410.957
4723	3563	4063	2707	2388		2915.7	1932.55	2342.6	1161.35	1094.65					90.4506	80.1277	87.8569	86.2838	87.4633		86.4365	1.71769		411.996			7890	8001	2288			4798.85	4929.45	1061.75							90.3114	93.174	80.17			87.8851	3.9451		411.996
4752	3817	4008	2743	2364		2944.7	2186.55	2287.6	1197.35	1070.65					91.316	90.2634	85.8692	88.7162	85.7038		88.3737	1.1346		413.034			7728	8102	2361			4636.85	5030.45	1134.75							87.3611	95.0027	85.3399			89.2346	2.94249		413.034
4780	3677	4290	2910	2209		2972.7	2046.55	2569.6	1364.35	915.65					92.1516	84.6768	96.0607	100	74.3402		89.4459	4.54639		414.068			7940	8099	2375			4848.85	5027.45	1148.75							91.222	94.9484	86.3314			90.8339	2.49506		414.068
4736	3717	3961	2793	2425		2928.7	2086.55	2240.6	1247.35	1131.65					90.8386	86.2729	84.1706	92.0946	90.176		88.7105	1.49467		415.102			8146	8194	2311			5054.85	5122.45	1084.75							94.9736	96.6685	81.7989			91.147	4.69959		415.102
4824	3686	4105	2784	2286		3016.7	2055.55	2384.6	1238.35	992.65					93.4646	85.0359	89.3748	91.4865	79.9853		87.8694	2.41706		416.141			7995	8315	2253			4903.85	5243.45	1026.75							92.2236	98.8593	77.6912			89.5914	6.25083		416.141
4604	3803	4149	2753	2334		2796.7	2172.55	2428.6	1207.35	1040.65					86.8994	89.7047	90.9649	89.3919	83.5044		88.0931	1.32311		417.174			7776	7978	2341			4684.85	4906.45	1114.75							88.2353	92.7576	83.9235			88.3055	2.55041		417.174
4741	3857	4104	2754	2243		2933.7	2226.55	2383.6	1208.35	949.65					90.9878	91.8595	89.3386	89.4595	76.8328		87.6956	2.75669		418.208			8007	7892	2215			4915.85	4820.45	988.75							92.4422	91.2004	75			86.2142	5.61855		418.208
4763	3755	4119	2735	2299		2955.7	2124.55	2398.6	1189.35	1005.65					91.6443	87.7893	89.8807	88.1757	80.9384		87.6857	1.82024		419.249			7894	8280	2374			4802.85	5208.45	1147.75							90.3843	98.2256	86.2606			91.6235	3.50913		419.249
4704	3873	4082	2768	2365		2896.7	2242.55	2361.6	1222.35	1071.65					89.8836	92.498	88.5435	90.4054	85.7771		89.4215	1.11128		420.284			8002	8040	2402			4910.85	4968.45	1175.75							92.3511	93.8801	88.2436			91.4916	1.68291		420.284
4694	3752	4162	2791	2387		2886.7	2121.55	2441.6	1245.35	1093.65					89.5852	87.6696	91.4348	91.9595	87.39		89.6078	0.936584		421.319			7834	8261	2400			4742.85	5189.45	1173.75							89.2916	97.8816	88.102			91.7584	3.0808		421.319
4805	3662	4113	2879	2286		2997.7	2031.55	2392.6	1333.35	992.65					92.8976	84.0782	89.6639	97.9054	79.9853		88.9061	3.1653		422.358			8152	8017	2257			5060.85	4945.45	1030.75							95.0829	93.4637	77.9745			88.8404	5.453		422.358
4882	3788	4091	2871	2297		3074.7	2157.55	2370.6	1325.35	1003.65					95.1955	89.1061	88.8688	97.3649	80.7918		90.2654	2.89613		423.394			7983	8027	2379			4891.85	4955.45	1152.75							92.0051	93.6448	86.6147			90.7549	2.12349		423.394
4882	3692	4136	2842	2304		3074.7	2061.55	2415.6	1296.35	1010.65					95.1955	85.2753	90.4951	95.4054	81.305		89.5353	2.76859		424.429			8242	8014	2478			5150.85	4942.45	1251.75							96.7219	93.4094	93.6261			94.5858	1.06989		424.429
4689	3611	4250	2781	2446		2881.7	1980.55	2529.6	1235.35	1152.65					89.436	82.0431	94.6151	91.2838	91.7155		89.8187	2.11372		425.47			8047	8274	2319			4955.85	5202.45	1092.75							93.1706	98.117	82.3654			91.2177	4.65074		425.47
4834	3812	4399	2769	2314		3026.7	2181.55	2678.6	1223.35	1020.65					93.7631	90.0638	100	90.473	82.0381		91.2676	2.9133		426.504			7908	8286	2403			4816.85	5214.45	1176.75							90.6392	98.3342	88.3144			92.4293	3.02778		426.504
4763	3843	4127	2779	2406		2955.7	2212.55	2406.6	1233.35	1112.65					91.6443	91.3009	90.1699	91.1486	88.783		90.6093	0.518116		427.538			8360	8142	2297			5268.85	5070.45	1070.75							98.8709	95.727	80.8074			91.8017	5.5716		427.538
4753	3710	4190	2847	2356		2945.7	2079.55	2469.6	1301.35	1062.65					91.3459	85.9936	92.4467	95.7432	85.1173		90.1293	2.00737		428.578			8002	8195	2344			4910.85	5123.45	1117.75							92.3511	96.6866	84.136			91.0579	3.6803		428.578
4577	3706	4089	2874	2386		2769.7	2075.55	2368.6	1328.35	1092.65					86.0937	85.834	88.7965	97.5676	87.3167		89.1217	2.17571		429.614			8422	8301	2382			5330.85	5229.45	1155.75							100	98.6058	86.8272			95.1443	4.178		429.614
4723	3704	4016	2768	2381		2915.7	2073.55	2295.6	1222.35	1087.65					90.4506	85.7542	86.1583	90.4054	86.9501		87.9437	1.03231		430.655			8035	8127	2398			4943.85	5055.45	1171.75							92.9521	95.4554	87.9603			92.1226	2.20302		430.655
4696	3864	4252	2795	2416		2888.7	2233.55	2531.6	1249.35	1122.65					89.6449	92.1389	94.6874	92.2297	89.5161		91.6434	0.958501		431.695			8246	8237	2160			5154.85	5165.45	933.75							96.7948	97.447	71.1048			88.4489	8.67407		431.695
4753	3655	4230	2751	2318		2945.7	2024.55	2509.6	1205.35	1024.65					91.3459	83.7989	93.8923	89.2568	82.3314		88.125	2.20452		432.729			7956	8259	2332			4864.85	5187.45	1105.75							91.5134	97.8454	83.2861			90.8816	4.21475		432.729
4627	3724	4128	2850	2448		2819.7	2093.55	2407.6	1304.35	1154.65					87.5858	86.5523	90.206	95.9459	91.8622		90.4304	1.66813		433.763			8323	8138	2347			5231.85	5066.45	1120.75							98.1971	95.6545	84.3484			92.7333	4.25621		433.763
4656	3702	4255	2768	2391		2848.7	2071.55	2534.6	1222.35	1097.65					88.4512	85.6744	94.7958	90.4054	87.6833		89.402	1.54682		434.807			8267	8193	2394			5175.85	5121.45	1167.75							97.1772	96.6504	87.677			93.8349	3.08267		434.807
4884	3757	4028	2823	2302		3076.7	2126.55	2307.6	1277.35	1008.65					95.2551	87.8691	86.592	94.1216	81.1584		88.9992	2.58773		435.843			8050	7923	2403			4958.85	4851.45	1176.75							93.2253	91.7617	88.3144			91.1005	1.45568		435.843
4875	3670	4199	2896	2353		3067.7	2039.55	2478.6	1350.35	1059.65					94.9866	84.3974	92.772	99.0541	84.8974		91.2215	2.86785		436.877			7993	8313	2341			4901.85	5241.45	1114.75							92.1872	98.8231	83.9235			91.6446	4.30969		436.877
4784	3820	4150	2797	2315		2976.7	2189.55	2429.6	1251.35	1021.65					92.271	90.3831	91.0011	92.3649	82.1114		89.6263	1.91611		437.923			8126	8245	2420			5034.85	5173.45	1193.75							94.6094	97.5919	89.5184			93.9066	2.35696		437.923
4897	3596	4204	2877	2416		3089.7	1965.55	2483.6	1331.35	1122.65					95.6431	81.4445	92.9527	97.7703	89.5161		91.4653	2.86037		438.957			7886	8299	2375			4794.85	5227.45	1148.75							90.2386	98.5696	86.3314			91.7132	3.60898		438.957
4690	3817	4063	2755	2338		2882.7	2186.55	2342.6	1209.35	1044.65					89.4658	90.2634	87.8569	89.527	83.7977		88.1822	1.16442		439.99			7948	8324	2218			4856.85	5252.45	991.75							91.3677	99.0223	75.2125			88.5341	7.0178		439.99
4769	3695	4169	2813	2319		2961.7	2064.55	2448.6	1267.35	1025.65					91.8233	85.3951	91.6877	93.4459	82.4047		88.9514	2.13827		441.029			8195	8232	2384			5103.85	5160.45	1157.75							95.866	97.3565	86.9688			93.3971	3.24281		441.029

## Sheet: Figure 1h
		Figure 1h	Normalised ACMA Oxalate Data																																						Figure 1h	Raw ACMA Oxalate Data
Time (s)		9.4mM				Mean	SEM		37.5mM						Mean	SEM		75mM							Mean	SEM		150mM									Mean	SEM			Time (s)		9.4mM				37.5mM
0		99.2341	92.0378	95.5506		95.6075	2.07758		91.138	89.46	90.4768	92.2026	104.234		93.5023	2.71983		86.806	98.118	94.1754	91.3548	76.2065	111.806		93.0777	4.84521		70.1851	80.0604	101.502	111.72	72.1234	90.3338	83.8527	96.5471		88.2905	5.1277			0		33815	16946	16918		24939	21669	21861
5.005		98.835	91.8586	95.8867		95.5268	2.02194		91.2293	88.2421	90.4188	92.336	104.101		93.2654	2.79061		86.6134	98.6753	94.1585	91.4605	75.9927	110.865		92.961	4.77886		70.5304	80.6458	102.663	109.981	71.7865	89.4789	83.7943	95.9956		88.1094	5.00713			5.005		33679	16913	16795		24964	21374	21847
10.009		98.5327	92.1627	92.6622		94.4525	2.04516		90.5971	89.3981	88.7302	92.2903	103.898		92.9827	2.795		85.8735	97.3278	94.2937	90.2902	76.1871	110.694		92.4444	4.73439		69.555	80.8769	100.369	111.103	72.3766	89.9788	83.6505	95.6722		87.9477	5.00614			10.009		33576	16969	16782		24791	21654	21439
15.012		99.011	92.0704	93.9896		95.0237	2.06922		91.5729	88.0687	89.8642	92.3932	104.247		93.2291	2.85291		85.6524	97.9536	94.6254	90.7671	76.1676	110.684		92.6417	4.76599		69.3094	81.0738	100.875	110.529	72.4184	90.2215	83.7583	95.6404		87.9782	4.99056			15.012		33739	16952	16783		25058	21332	21713
20.017		99.1167	92.103	94.7758		95.3318	2.04368		88.9563	88.4568	89.7897	92.3246	103.254		92.5563	2.75609		84.6782	97.3415	94.393	91.0326	75.9668	109.767		92.1965	4.69505		69.5479	80.2678	98.9632	109.594	71.7249	89.2797	83.5853	95.0178		87.2476	4.85044			20.017		33775	16958	16962		24342	21426	21695
25.023		99.8004	92.1301	95.5962		95.8423	2.21765		90.7214	88.4692	89.798	91.953	103.175		92.8233	2.64996		84.514	96.5992	93.9156	90.0454	75.928	109.642		91.774	4.66876		68.8679	81.3179	99.8002	108.189	71.7887	89.3594	83.4977	94.8402		87.2076	4.78877			25.023		34008	16963	16828		24825	21429	21697
30.025		98.6002	92.1084	97.0888		95.9325	1.96118		90.5131	87.8994	88.1963	91.9244	103.804		92.4674	2.93031		83.6471	96.0008	94.5811	91.1795	75.9215	110.196		91.921	4.77034		68.6436	81.0291	98.226	109.188	72.4514	89.6945	83.5	95.2198		87.244	4.79802			30.025		33599	16959	16787		24768	21291	21310
35.029		98.7146	91.7771	98.0174		96.1697	2.20551		89.9284	88.7334	88.0846	91.9301	102.65		92.2654	2.67749		84.0346	96.3685	93.5205	90.7336	75.9312	109.14		91.6215	4.61009		68.0669	80.4332	98.3983	108.351	73.156	89.4862	83.473	95.0197		87.048	4.74707			35.029		33638	16898	16885		24608	21493	21283
40.036		98.2745	92.4669	99.1227		96.6213	2.09161		90.6483	88.2793	88.7095	91.8768	102.42		92.3868	2.59179		82.5372	95.2403	92.9691	89.5453	76.0543	108.649		90.8325	4.5836		67.832	80.1496	96.9446	108.42	72.2687	89.5532	83.4303	95.0197		86.7022	4.76579			40.036		33488	17025	16668		24805	21383	21434
45.041		98.5004	92.2279	98.7125		96.4803	2.12706		89.7639	89.9265	88.0308	91.7643	102.683		92.4336	2.62952		82.5088	95.4207	92.8233	89.0246	75.9636	108.2		90.6569	4.54646		68.0384	80.3203	97.0204	107.825	72.5439	88.9392	83.2775	94.7225		86.586	4.67349			45.041		33565	16981	16910		24563	21782	21270
50.043		98.7264	92.4777	99.4417		96.8819	2.21176		89.552	88.5765	87.4845	91.7186	102.163		91.8989	2.6591		82.4825	94.8177	92.3374	89.0891	75.9798	107.62		90.3877	4.44273		67.8782	80.1812	95.8527	107.77	72.9358	88.3578	83.3023	94.6626		86.3676	4.61124			50.043		33642	17027	16844		24505	21455	21138
55.046		97.6846	92.1844	99.3961		96.4217	2.17548		88.5689	87.887	88.5937	91.6138	102.148		91.7623	2.67528		82.0972	95.1603	92.3818	88.6715	76.1191	107.758		90.3647	4.48613		67.6896	80.6327	96.1558	107.67	72.0177	88.7744	83.3719	95.2085		86.4401	4.68692			55.046		33287	16973	16772		24236	21288	21406
60.05		99.2223	92.2062	99.4189		96.9491	2.37216		88.7918	89.4641	87.0416	91.6957	101.671		91.7328	2.59386		81.7951	94.0252	91.7459	87.8957	75.9571	107.814		89.8722	4.49242		67.9388	81.2969	95.0811	106.74	73.4334	88.6965	83.3135	94.9711		86.4339	4.45677			60.05		33811	16977	16831		24297	21670	21031
97.7		100	100	100		100	0		100	100	100	100	100		100	0		100	100	100	100	100	100		100	0		100	100	100	100	100	100	100	100		100	0			97.7		34076	18412	16265		27364	24222	24162
102.703		100.173	100.065	99.191		99.8098	0.310941		99.0206	100.31	101.25	100.276	96.471		99.4655	0.828219		99.7001	98.5223	100.049	99.4922	99.7927	103.074		100.105	0.63145		99.2488	100.961	98.6773	100.059	99.7534	100.295	99.8854	99.3214		99.7752	0.2485			102.703		34135	18424	16498		27096	24297	24464
107.711		99.8093	100.19	99.4645		99.8213	0.209555		98.9987	100.016	101.912	100.511	97.2134		99.7303	0.784893		100.639	98.3464	99.9979	99.0953	99.6534	103.991		100.287	0.806575		99.9003	100.961	99.5212	99.2252	98.6745	100.371	99.9348	99.6093		99.7747	0.246705			107.711		34011	18447	16636		27090	24226	24624
112.715		99.8327	100.429	99.1341		99.7986	0.374237		99.4043	99.9546	101.569	100.551	97.2654		99.7487	0.717044		99.3958	98.1226	99.888	99.9665	99.2453	102.847		99.9108	0.646242		100.313	101.504	99.8588	99.4035	99.192	100.935	100.007	98.9437		100.02	0.309835			112.715		34019	18491	16780		27201	24211	24541
117.719		100.561	102.01	99.6753		100.748	0.680385		99.0316	99.872	99.5075	100.61	97.5153		99.3072	0.516848		99.0784	97.1999	99.6303	99.8015	98.9732	102.055		99.4564	0.642138		99.612	99.8609	99.2146	99.3944	98.549	99.5798	99.7888	99.2859		99.4107	0.147084			117.719		34267	18782	17042		27099	24191	24043
122.711		100.425	101.255	100.137		100.606	0.335038		98.8342	99.3064	100.546	100.353	97.2382		99.2555	0.596626		99.5972	97.8919	99.5606	98.3194	98.9117	102.025		99.3844	0.595422		100.338	100.192	99.7244	98.6607	99.0246	98.9912	99.836	99.7738		99.5676	0.214309			122.711		34221	18643	17205		27045	24054	24294
127.714		100.475	100.712	99.0942		100.094	0.504386		97.4163	99.0257	99.4454	100.312	96.9338		98.6267	0.632551		99.4549	97.659	98.0521	98.786	98.3935	103.335		99.2801	0.849279		99.7722	99.9737	97.0824	98.7636	99.1105	98.2196	99.827	99.0036		98.9691	0.342649			127.714		34238	18543	17399		26657	23986	24028
132.719		99.9648	101.287	99.2195		100.157	0.604592		97.6246	98.1422	100.857	99.9886	97.597		98.8418	0.666911		98.4194	97.8485	99.0831	98.2137	98.1635	102.553		99.0469	0.72109		100.235	99.6535	99.6418	97.9637	98.3641	99.7555	99.618	99.2896		99.3151	0.270073			132.719		34064	18649	17327		26714	23772	24369
137.725		100.246	101.189	99.5784		100.338	0.4673		98.5273	99.1991	100.84	99.8247	97.545		99.1873	0.559962		97.9378	98.0518	99.1761	98.7756	97.9756	103.285		99.2004	0.842252		100.619	100.667	98.822	97.7305	98.0162	99.1542	99.5844	98.955		99.1936	0.379833			137.725		34160	18631	17455		26961	24028	24365
142.728		99.5041	101.977	98.5928		100.025	1.01101		98.4322	98.3858	102.301	99.4989	97.9237		99.3083	0.791481		98.2815	97.9376	96.8712	98.4199	97.8072	102.395		98.6187	0.787155		100.744	99.5563	98.0538	98.0391	97.6815	98.3138	99.4293	98.9082		98.8408	0.362747			142.728		33907	18776	17447		26935	23831	24718
147.732		100.185	101.081	99.0543		100.107	0.586309		98.3226	98.844	99.3502	99.5389	97.5995		98.731	0.353266		97.6029	97.5745	98.4641	97.4688	97.6906	103.051		98.642	0.893935		100.342	99.3935	99.3214	96.7478	99.5442	99.2339	99.4271	99.0073		99.1271	0.366817			147.732		34139	18611	17451		26905	23942	24005
152.737		100.558	100.728	98.8036		100.03	0.614992		97.7745	99.0504	100.952	99.4417	97.5252		98.9487	0.619326		98.0057	97.0195	97.3782	97.1595	97.208	102.612		98.2306	0.887656		99.4233	100.031	95.0777	97.6483	99.1633	98.4696	99.2294	98.9045		98.4934	0.547263			152.737		34266	18546	17553		26755	23992	24392
157.746		99.6625	100.994	98.8036		99.82	0.637164		97.7927	98.5592	101.726	99.0091	97.8049		98.9784	0.724859		97.2592	97.3255	97.5324	97.4714	96.9878	103.473		98.3416	1.02931		99.3592	100.021	97.8609	97.3077	99.6873	99.2248	99.2339	98.3904		98.8857	0.332132			157.746		33961	18595	17411		26760	23873	24579
162.758		99.7447	100.505	98.7979		99.6826	0.493795		98.6004	98.7408	99.3958	98.8376	97.253		98.5655	0.354818		97.4912	96.8413	97.955	97.8039	96.7157	102.23		98.1728	0.836727		99.1812	99.5957	97.792	95.9342	98.538	98.5565	99.1912	98.7587		98.4434	0.406924			162.758		33989	18505	17459		26981	23917	24016
167.762		99.8621	101.972	98.4732		100.102	1.01699		98.2568	99.2486	99.7268	98.567	97.253		98.6105	0.425625		97.106	97.3209	96.7571	96.8321	96.7254	103.061		97.9671	1.0231		99.7544	99.3778	99.4316	97.3397	98.7714	98.3736	98.9013	98.6316		98.8227	0.267034			167.762		34029	18775	17401		26887	24040	24096
172.766		98.8232	101.678	98.1656		99.5557	1.07815		97.6612	99.1702	100.273	98.085	97.2357		98.485	0.550756		96.5236	97.3552	96.8733	97.6003	96.5375	103.493		98.0639	1.10022		99.879	99.3988	98.5395	96.7592	98.9476	98.3428	98.9103	98.267		98.6305	0.328758			172.766		33675	18721	17496		26724	24021	24228
177.769		98.6295	101.944	98.6156		99.7299	1.10728		97.8987	99.455	98.986	97.9821	97.4955		98.3635	0.367005		96.5412	97.2319	96.7085	96.9584	96.2039	102.705		97.7248	1.00627		99.199	99.9816	98.5498	96.9055	98.4191	98.6652	98.7486	98.0408		98.5637	0.313469			177.769		33609	18770	17577		26789	24090	23917
182.774		99.4835	101.179	97.9092		99.5238	0.944012		97.3944	98.6004	98.1914	97.6543	97.1243		97.793	0.267948		96.4514	97.257	96.7064	97.9766	96.0096	103.355		97.9593	1.11428		98.8466	98.8448	99.3145	96.7112	98.9365	97.4481	98.8924	97.8277		98.3527	0.322705			182.774		33900	18629	17394		26651	23883	23725
187.779		98.339	100.961	98.4162		99.2388	0.861515		96.7256	100.045	98.2286	97.4599	97.352		97.9623	0.572906		96.1646	96.919	96.5564	97.5436	96.11	102.434		97.6213	0.986665		98.6081	99.2492	98.3259	95.5525	97.9083	97.9751	98.7081	98.2128		98.0675	0.390646			187.779		33510	18589	17416		26468	24233	23734
192.783		98.6706	101.532	98.5529		99.5851	0.973864		96.8755	98.3858	99.5033	97.1551	96.8026		97.7444	0.524148		96.6637	96.855	95.5064	97.0332	95.9092	102.675		97.4405	1.07393		98.2627	99.0444	98.3569	95.2257	97.3711	97.6853	98.6475	97.4519		97.7557	0.416631			192.783		33623	18694	17479		26509	23831	24042
197.792		98.7528	101.238	98.177		99.3893	0.939303		97.5734	99.4798	98.1997	96.6082	97.2827		97.8288	0.485629		95.8231	96.3982	95.6585	97.1543	95.8314	102.349		97.2024	1.05353		98.0527	98.6742	96.428	95.4177	98.6261	96.8975	98.5082	98.1156		97.59	0.425342			197.792		33651	18640	17306		26700	24096	23727
202.801		99.2106	100.538	98.5757		99.4413	0.578001		97.5698	98.328	98.7915	96.3109	97.7405		97.7481	0.419659		95.3984	97.1359	96.2395	95.8449	95.527	103.114		97.2099	1.20805		97.8889	99.2387	97.0342	95.8382	97.8158	97.3466	98.4093	97.536		97.6385	0.352308			202.801		33807	18511	17387		26699	23817	23870
207.808		98.7733	101.059	97.7497		99.194	0.978234		97.303	98.489	98.328	96.0499	97.055		97.445	0.446551		95.5276	96.3343	95.6775	95.7857	95.5011	102.777		96.9339	1.17521		98.5902	99.5931	96.8379	94.3229	98.1263	97.4535	98.2857	97.4631		97.5841	0.551918			207.808		33658	18607	17343		26626	23856	23758
212.813		98.1042	101.26	97.6471		99.0038	1.1358		96.711	97.8532	98.3652	95.7335	97.4535		97.2233	0.460192		95.4203	96.1721	94.843	95.8913	95.4169	101.936		96.6133	1.08072		98.0064	98.8553	97.2926	94.0144	98.3267	97.823	98.1622	97.8221		97.5378	0.527871			212.813		33430	18644	17343		26464	23702	23767
217.818		98.2862	101.581	97.8294		99.232	1.18161		96.8389	98.1876	98.9032	95.5849	96.8843		97.2798	0.578064		95.7399	96.131	94.5325	96.1465	95.0735	101.719		96.557	1.06394		97.8035	99.4513	97.048	94.2155	97.8709	97.2126	97.9555	97.2687		97.3532	0.520999			217.818		33492	18703	17342		26499	23783	23897
222.808		99.0316	101.521	97.6471		99.3998	1.13326		96.5539	98.9431	97.6658	95.3962	96.9561		97.103	0.589018		95.2036	95.9163	95.0142	96.6723	95.0444	101.722		96.5954	1.05816		97.7679	98.8764	96.738	94.1104	98.2056	96.8486	97.6656	97.4669		97.2099	0.505571			222.808		33746	18692	17285		26421	23966	23598
227.812		98.518	101.298	97.4705		99.0955	1.14204		96.8937	99.5211	97.9472	95.3334	97.2703		97.3931	0.683459		94.7395	95.8661	94.5409	96.4764	94.9602	102.579		96.5271	1.24722		97.1556	98.5298	95.1776	93.6441	98.5292	96.8739	97.7375	97.0911		96.8424	0.592443			227.812		33571	18651	17231		26514	24106	23666
232.816		98.7381	100.869	96.7698		98.7923	1.18365		96.9047	98.0926	97.9472	95.3372	96.5749		96.9713	0.502078		94.5687	96.1972	95.1937	96.1981	94.7399	102.236		96.5223	1.17785		96.9455	98.3303	95.987	93.6624	99.0026	97.7704	97.7712	97.0986		97.071	0.584107			232.816		33646	18572	17310		26517	23760	23666
237.823		98.4564	101.667	98.5074		99.5437	1.06194		96.7476	99.1495	97.8065	95.2781	96.9387		97.1841	0.637724		93.6603	95.6217	94.1459	95.7908	94.8177	101.207		95.8739	1.1183		97.4333	98.2358	96.428	94.4441	98.1791	96.1893	97.7802	97.3098		96.9999	0.449746			237.823		33550	18719	17186		26474	24016	23632
242.827		98.6383	100.831	97.311		98.9268	1.02632		97.4638	98.0472	97.5995	95.1867	97.1144		97.0823	0.496926		94.3236	95.5166	94.0846	95.7186	94.7626	101.25		95.9427	1.09344		97.0132	98.0362	96.4693	93.9344	97.8599	97.1365	97.5982	96.8032		96.8564	0.457927			242.827		33612	18565	17275		26670	23749	23582
247.83		98.5914	100.755	97.0489		98.7984	1.07481		97.2446	99.0959	96.7014	95.1562	96.7878		96.9972	0.631915		93.5311	96.5809	93.4952	94.8062	94.4646	102.015		95.8156	1.32251		97.0061	98.0704	95.7218	93.5573	98.1924	97.6509	97.3758	96.8611		96.8045	0.540034			247.83		33596	18551	17299		26610	24003	23365
252.841		98.6207	101.287	96.9863		98.9647	1.25343		96.9412	98.6046	99.1764	95.1085	97.456		97.4573	0.709034		93.9383	95.4938	94.2663	95.1387	94.3836	101.471		95.782	1.16213		96.0306	98.9577	95.5565	93.1071	98.0294	97.1293	97.2747	96.5134		96.5748	0.626123			252.841		33606	18649	17233		26527	23884	23963
257.85		97.8166	101.168	97.1971		98.7271	1.23332		95.929	98.0968	97.7692	95.1104	96.5749		96.6961	0.558166		93.4457	94.8794	93.0452	95.8089	94.5132	101.775		95.5778	1.30429		96.8174	97.5847	96.1248	92.698	97.7036	96.8902	97.232	96.6032		96.4567	0.567036			257.85		33332	18627	17303		26250	23761	23623
262.853		98.2275	101.684	96.4678		98.793	1.53201		96.7366	99.294	97.881	95.2038	96.2507		97.0732	0.702459		93.1195	95.6285	93.3473	95.9145	94.1731	101.55		95.6222	1.27497		96.5717	97.9995	95.1879	91.8844	97.5054	96.3831	97.1287	96.3059		96.1208	0.675944			262.853		33472	18722	17158		26471	24051	23650
267.859		98.0133	101.885	97.2483		99.0487	1.43503		96.0203	98.8193	96.5028	95.0876	97.2976		96.7455	0.630033		94.2535	95.6445	93.7381	95.4686	94.2281	101.465		95.7996	1.17382		96.4934	97.4875	93.9995	91.537	97.6771	96.2563	97.1938	96.1003		95.8431	0.737922			267.859		33399	18759	17140		26275	23936	23317
272.863		98.1013	101.483	96.7755		98.7865	1.40138		95.6622	96.8376	97.4588	95.0609	96.8744		96.3788	0.440056		93.704	94.7652	93.1508	95.1284	94.1666	101.395		95.3851	1.2366		96.3154	97.9076	95.2361	91.9141	97.0034	96.6367	97.1017	96.5527		96.0835	0.653184			272.863		33429	18685	17172		26177	23456	23548
277.867		97.306	101.396	97.1287		98.6102	1.39375		96.9303	98.7738	98.5183	95.0056	97.4411		97.3338	0.673483		93.3384	95.0781	93.1635	96.3914	94.186	101.128		95.5476	1.21782		95.2652	98.5324	94.1476	91.5735	96.8779	96.4737	96.9534	95.7002		95.6905	0.746486			277.867		33158	18669	17140		26524	23925	23804
282.872		98.2862	101.325	97.5218		99.0444	1.16156		96.1775	98.7037	98.1872	94.9313	96.8323		96.9664	0.681561		94.1397	94.5094	92.7093	94.6696	93.9334	101.211		95.1953	1.23582		95.4361	97.603	94.5541	90.8925	97.6177	97.2398	96.8456	95.76		95.7436	0.795813			282.872		33492	18656	17109		26318	23908	23724
287.876		98.3419	101.244	96.0406		98.5421	1.50538		96.3565	98.7037	97.6119	94.9103	97.0229		96.9211	0.633522		92.5503	95.3522	94.2642	95.2005	93.7974	100.498		95.2771	1.12429		94.8594	97.2014	94.5024	91.345	97.076	96.9699	96.7759	95.6086		95.5423	0.705012			287.876		33511	18641	16986		26367	23908	23585
292.881		97.846	101.255	97.254		98.7849	1.24663		96.7585	98.4972	97.8313	94.8856	96.6442		96.9234	0.614781		92.5372	95.1535	92.1874	94.5226	93.7974	100.871		94.8448	1.29094		95.0979	95.3899	94.84	90.7348	97.4658	96.4048	96.6569	95.4572		95.2559	0.717924			292.881		33342	18643	17291		26477	23858	23638
297.887		96.8277	101.51	96.8951		98.4109	1.54962		96.0715	98.2206	97.852	94.8017	96.768		96.7428	0.617793		93.3472	94.8611	93.9663	95.6619	93.6808	100.333		95.3084	1.06255		95.639	97.0622	95.1741	90.5039	96.6159	97.1945	96.8231	95.6367		95.5812	0.771823			297.887		32995	18690	17081		26289	23791	23643
302.89		98.0514	101.76	97.0774		98.9628	1.42641		95.2273	97.2711	97.4381	94.7122	96.909		96.3115	0.560377		92.5657	95.3887	92.3691	94.9608	93.603	100.696		94.9306	1.25654		95.5821	97.1515	94.2234	90.7462	96.5983	96.0824	96.6995	94.7187		95.2253	0.731355			302.89		33412	18736	17035		26058	23561	23543
307.894		97.1652	101.895	95.7728		98.2778	1.85296		96.6635	97.6468	97.9762	94.817	96.9412		96.8089	0.550952		92.4387	95.2951	92.7431	94.4582	93.7585	100.914		94.9345	1.27177		94.4179	97.5584	94.6471	89.4389	97.5142	96.6765	96.4973	94.7187		95.1836	0.936536			307.894		33110	18761	17024		26451	23652	23673
312.9		97.5877	100.527	97.0546		98.3897	1.07956		94.9276	96.7839	97.1153	94.6588	97.6539		96.2279	0.603444		91.968	94.9022	92.7684	94.8551	93.4994	99.4162		94.5682	1.07764		94.5319	96.4794	93.1831	89.9234	96.7061	97.5911	96.54	94.4047		94.92	0.884187			312.9		33254	18509	17061		25976	23443	23465
317.91		97.0507	100.668	96.6729		98.1305	1.27341		96.1153	98.0142	96.7842	94.5712	97.008		96.4986	0.57009		91.6025	94.8292	91.8156	95.314	93.616	100.175		94.5587	1.2824		95.1905	96.6395	92.1877	89.0801	96.3252	96.3668	96.3176	94.2009		94.5385	0.944668			317.91		33071	18535	16933		26301	23741	23385
322.915		96.8893	100.896	96.8951		98.2269	1.33466		95.8595	96.7963	98.5721	94.3349	97.0773		96.528	0.700317		92.8919	94.1348	91.8177	94.1076	93.2921	100.251		94.4158	1.21868		94.005	96.6579	93.4622	89.5463	96.2988	96.9228	96.3446	93.9728		94.6513	0.877502			322.915		33016	18577	17070		26231	23446	23817
327.919		97.8255	101.341	95.8469		98.3379	1.60673		95.2712	97.0316	97.8437	94.5292	97.4683		96.4288	0.64786		91.5674	93.6918	91.729	94.7211	93.4022	99.9505		94.177	1.25523		94.1652	97.0202	88.4847	88.9727	96.0985	96.6656	96.2637	93.6905		93.9201	1.20652			327.919		33335	18659	16987		26070	23503	23641
332.926		97.2884	101.271	96.5248		98.3614	1.47137		96.6452	98.0637	96.747	94.4244	96.9857		96.5732	0.593484		90.8888	93.5524	92.4663	94.5407	93.1204	100.366		94.1558	1.33766		94.0762	96.7997	85.2227	88.575	95.5392	95.8995	96.248	93.827		93.2734	1.47086			332.926		33152	18646	17049		26446	23753	23376
337.931		96.7367	101.428	96.616		98.2604	1.58441		95.03	97.6385	97.4754	94.3196	96.617		96.2161	0.662316		91.5018	93.324	91.729	95.1129	93.0135	100.29		94.1619	1.33514		93.5956	96.0725	85.3708	88.0837	97.5781	95.9792	96.012	93.1484		93.23	1.52757			337.931		32964	18675	17118		26004	23650	23552
342.941		96.6047	101.168	96.5248		98.0991	1.5345		95.1725	98.7532	96.8918	94.11	96.7581		96.3371	0.794942		90.2124	93.2601	91.3529	94.3113	93.1237	99.337		93.5996	1.29469		93.1613	96.9388	86.9519	87.9877	95.7131	96.3088	96.1199	92.6567		93.2298	1.36919			342.941		32919	18627	16858		26043	23920	23411
347.947		97.4498	101.347	96.1944		98.3304	1.5512		94.913	97.5972	96.7718	94.0243	96.518		95.9649	0.651689		91.1712	92.7165	92.8571	95.2753	93.1107	99.3238		94.0758	1.17872		92.9762	96.5608	86.759	86.9386	96.4397	95.7148	95.7716	92.6118		92.9716	1.43551			347.947		33207	18660	17071		25972	23640	23382
352.953		97.1211	100.51	95.5677		97.7331	1.4593		95.812	97.2215	96.2793	94.0567	97.5772		96.1893	0.620094		90.6611	91.5083	92.3839	93.855	92.9423	98.9148		93.3776	1.19636		92.9975	96.0357	84.5269	87.0118	95.8254	95.4667	95.7245	92.1015		92.4612	1.56321			352.953		33095	18506	17008		26218	23549	23263
357.96		96.9861	99.8425	95.8583		97.5623	1.18568		96.013	97.4156	97.1608	93.8394	97.5129		96.3883	0.691168		91.6134	92.769	91.5114	93.9736	92.9034	98.796		93.5945	1.10488		93.5422	95.823	85.264	87.1946	95.7902	95.5663	95.8211	91.4023		92.5505	1.49449			357.96		33049	18383	17040		26273	23596	23476
362.963		96.9627	101.336	96.0178		98.1055	1.63816		94.8509	98.328	96.4531	93.7937	96.9189		96.0689	0.794782		91.7185	91.7824	91.4396	93.5148	92.79	99.5019		93.4579	1.25015		92.1111	95.7627	84.7473	85.9742	95.7418	95.6369	95.7919	92.1277		92.2367	1.60499			362.963		33041	18658	16811		25955	23817	23305
367.968		97.9135	100.559	96.1773		98.2167	1.27406		95.5818	97.8202	97.3057	93.969	97.8049		96.4963	0.753113		91.0727	92.6983	91.2072	93.8396	92.8289	98.6113		93.3763	1.13124		92.5347	94.7283	86.3904	86.3901	95.5238	95.454	95.4301	91.3256		92.2221	1.38126			367.968		33365	18515	17036		26155	23694	23511
372.978		96.4843	100.152	96.0691		97.5685	1.29735		95.1579	97.9647	97.3016	93.6546	97.159		96.2475	0.800027		90.9851	91.8852	91.1734	93.1977	92.7091	98.6971		93.1079	1.17118		92.549	95.2455	85.7704	86.4747	95.7946	95.3707	95.5402	90.7405		92.1857	1.46248			372.978		32878	18440	16969		26039	23729	23510
377.989		96.9421	100.712	96.3083		97.9873	1.37433		95.6183	97.4816	97.5416	93.647	97.743		96.4063	0.789518		90.8297	92.3123	91.4755	92.9993	92.8062	98.5816		93.1674	1.1333		92.0114	94.5576	85.8703	85.821	95.1759	95.4594	95.4301	90.9069		91.9041	1.44689			377.989		33034	18543	17008		26165	23612	23568
382.996		96.8247	99.5764	95.1518		97.1843	1.28984		95.3589	96.8046	96.5524	93.5765	97.3198		95.9224	0.668913		90.5341	92.4173	91.0382	92.9864	92.6249	99.2314		93.1387	1.27965		92.1609	96.0068	85.5947	85.7685	95.821	95.3308	95.4414	90.3143		92.0548	1.56008			382.996		32994	18334	16824		26094	23448	23329
387.999		96.4667	99.8045	95.5164		97.2625	1.30023		95.3077	97.0894	96.9704	93.4488	97.2728		96.0178	0.73263		90.6524	91.8737	90.9515	93.3576	92.586	97.8724		92.8823	1.07908		91.9437	94.9829	84.9161	85.3777	94.9183	96.1422	95.3717	89.8936		91.6933	1.6017			387.999		32872	18376	16943		26080	23517	23430
393.003		96.8893	99.7882	96.1431		97.6069	1.11173		95.505	97.1225	96.0558	93.3821	96.9363		95.8003	0.672256		88.9711	92.0702	91.8726	93.1539	92.5212	97.3413		92.6551	1.10685		91.8405	95.2953	84.6716	84.4269	95.3829	94.7041	95.165	89.587		91.3842	1.65564			393.003		33016	18373	16959		26134	23525	23209
398.006		96.3493	100.239	96.2798		97.6227	1.30829		94.7778	97.172	96.809	93.4736	97.4015		95.9268	0.769482		90.1883	91.6773	90.9304	92.3575	92.2686	98.0044		92.5711	1.13763		91.5344	94.8438	84.0033	84.2258	95.2134	94.3546	94.9741	89.4618		91.0764	1.6745			398.006		32832	18456	16943		25935	23537	23391
403.011		96.6604	100.217	95.693		97.5236	1.37547		94.8472	97.4692	96.6062	93.1401	97.545		95.9216	0.848246		89.0652	91.2685	91.6043	92.4709	92.3593	97.9054		92.4456	1.20191		92.2748	95.2927	85.1779	84.7835	94.5132	95.9665	95.0212	89.0299		91.5075	1.62346			403.011		32938	18452	16885		25954	23609	23342
408.017		96.3376	99.9728	95.4766		97.2623	1.37786		94.4891	98.0679	97.4009	92.9515	97.0946		96.0008	0.975015		89.3454	91.2913	91.5938	93.77	92.301	98.1264		92.738	1.22749		91.4454	95.6314	84.1583	83.6979	95.1627	94.4995	94.7808	88.2728		90.9561	1.75799			408.017		32828	18407	16775		25856	23754	23534
413.02		96.9832	99.3645	95.0664		97.138	1.24319		94.8911	96.3546	96.5442	93.0086	97.0427		95.5682	0.733306		89.7461	91.4695	90.9558	93.7391	92.1293	97.4271		92.5778	1.10971		91.157	95.088	84.8679	83.4762	95.1341	95.032	94.7359	87.6989		90.8987	1.73754			413.02		33048	18295	16826		25966	23339	23327
418.026		97.1388	99.9674	95.5563		97.5542	1.2902		94.3393	96.3958	95.4764	92.9762	97.0823		95.254	0.732144		89.4877	91.7184	90.0051	92.8137	92.1066	97.2358		92.2279	1.12762		91.5486	93.6545	83.7484	83.819	95.2816	95.7401	94.8932	88.112		90.8497	1.77088			418.026		33101	18406	16854		25815	23349	23069
423.03		96.3552	99.6252	95.6304		97.2036	1.22876		95.7864	96.7922	97.0739	92.7857	96.6863		95.8249	0.789809		89.2447	91.2959	90.8396	92.7699	92.0321	97.404		92.2644	1.13742		91.125	94.9409	84.241	84.3721	95.1209	95.2729	94.9156	87.9419		90.9913	1.71695			423.03		32834	18343	16882		26211	23445	23455
428.036		96.2408	98.7617	95.5221		96.8415	0.982235		94.8107	96.561	96.0599	92.6637	96.5304		95.3251	0.737143		89.5337	91.2274	91.4332	93.0122	91.9706	97.2886		92.4109	1.07984		91.1606	94.7361	83.1008	83.8898	95.319	94.8382	94.7561	87.8895		90.7113	1.80988			428.036		32795	18184	16863		25944	23389	23210
433.046		96.3611	99.962	95.1005		97.1412	1.45657		95.1067	97.0027	97.3429	92.7952	97.3743		95.9244	0.887063		88.6821	91.6339	90.3558	92.4709	91.99	97.3183		92.0752	1.18768		90.7512	94.765	84.4029	84.0315	95.5018	94.7603	94.637	87.1062		90.7445	1.7351			433.046		32836	18405	16905		26025	23496	23520
438.052		95.422	100.152	95.055		96.8764	1.64129		95.5416	96.3546	97.2726	92.6123	96.8744		95.7311	0.831712		89.2513	91.5243	90.829	92.2492	91.9576	96.6717		92.0805	1.01658		90.2029	95.4765	84.8334	83.1813	95.1363	94.9233	94.5269	87.0614		90.6678	1.78986			438.052		32516	18440	16702		26144	23339	23503
443.058		95.8945	98.7019	95.0265		96.541	1.10916		95.2748	97.0523	96.1427	92.3226	96.9338		95.5452	0.866442		88.2728	90.1083	89.8487	92.2183	91.7439	96.2132		91.4009	1.12264		89.9858	93.8645	84.6647	82.9391	94.064	94.4234	94.5472	86.6463		90.1419	1.69612			443.058		32677	18173	16766		26071	23508	23230
448.064		95.6597	100.092	94.4511		96.7344	1.71484		94.4489	96.8417	97.7237	92.5894	96.7878		95.6783	0.943946		89.1375	91.4261	89.5107	92.2337	91.9123	96.8169		91.8395	1.12294		89.8576	94.2741	83.8655	82.6557	94.1807	93.6301	94.464	86.7361		89.958	1.74786			448.064		32597	18429	16876		25845	23457	23612
453.065		96.6399	98.7291	95.1063		96.8251	1.04992		95.2017	97.1018	96.122	92.4884	97.1268		95.6082	0.857301		87.9947	90.5148	89.4177	92.3626	91.9188	97.1467		91.5592	1.29585		90.3809	94.2347	83.2283	82.4523	94.5154	94.2948	94.2663	85.8556		89.9035	1.86624			453.065		32931	18178	16900		26051	23520	23225
458.071		96.0207	99.2994	94.3941		96.5714	1.44255		93.3855	98.4394	95.1825	92.1855	96.9585		95.2303	1.13934		88.0801	90.3526	90.098	92.0765	91.4459	96.5266		91.43	1.16261		89.8469	93.8042	83.962	82.0546	94.6739	94.9541	94.2484	85.6537		89.8997	1.87716			458.071		32720	18283	16797		25554	23844	22998
463.077		96.1938	98.7562	94.7131		96.5544	1.18099		94.2772	97.1803	94.0568	92.1302	96.6863		94.8661	0.926161		88.3778	89.9187	90.2438	92.1538	91.394	96.4507		91.4232	1.13636		90.1353	93.8593	83.8449	82.3609	95.024	93.737	94.3697	85.3639		89.8369	1.84553			463.077		32779	18183	16759		25798	23539	22726
468.081		96.2026	98.9246	94.6106		96.5793	1.2595		94.3502	97.2876	95.6916	92.1969	96.7383		95.2529	0.913586		88.0538	90.7478	90.0727	91.793	91.4718	96.0252		91.3607	1.07899		89.9181	93.497	83.087	82.2375	93.2406	94.5774	93.945	85.2031		89.4632	1.83227			468.081		32782	18214	16687		25818	23565	23121
473.086		95.5247	99.0061	94.8442		96.4583	1.28894		94.5585	96.1523	95.7537	91.993	96.2186		94.9352	0.793619		88.4742	89.8022	90.3642	91.6821	91.3325	96.0153		91.2784	1.05645		89.2168	94.6968	82.7495	81.9929	93.7602	93.9036	93.999	85.0629		89.4227	1.91998			473.086		32551	18229	16773		25875	23290	23136
478.091		97.2884	99.408	94.9296		97.2087	1.2934		94.2552	96.2472	95.6585	91.8634	96.471		94.8991	0.851319		88.0801	90.565	89.3818	91.7749	91.2645	95.5436		91.1017	1.04221		89.2524	93.9249	83.3075	81.0947	94.0244	94.2133	93.963	84.8647		89.3306	1.94797			478.091		33152	18303	16786		25792	23313	23113
483.097		95.6568	99.4677	95.3683		96.8309	1.32103		94.2004	97.2463	97.5664	91.7034	96.0503		95.3534	1.0867		88.9229	89.1787	89.76	91.4888	91.0799	95.3589		90.9649	0.973083		89.5443	93.0507	82.4395	81.2501	94.0728	94.1463	93.7945	84.0085		89.0383	1.98167			483.097		32596	18314	16767		25777	23555	23574
488.1		95.689	98.6259	93.9839		96.0996	1.35565		94.9825	96.788	95.8737	91.7834	96.617		95.2089	0.913889		87.5	89.551	90.6938	90.633	91.1511	95.7217		90.8751	1.10758		89.5906	94.1061	83.4453	81.1313	93.4321	93.8004	93.7226	84.4105		89.2049	1.91288			488.1		32607	18159	16693		25991	23444	23165
493.103		95.5863	99.723	94.7302		96.6799	1.54151		94.1383	95.5247	95.5633	91.6214	95.8548		94.5405	0.788194		88.2005	90.0032	89.7304	91.3007	90.9568	95.448		90.9399	1.00494		89.3236	93.1846	82.2603	80.9736	93.5598	93.248	93.5519	84.059		88.7701	1.94114			493.103		32572	18361	16685		25760	23138	23090
498.109		96.0999	99.408	94.4169		96.6416	1.46604		93.7546	95.8055	94.7976	91.4671	96.4141		94.4478	0.871702		87.697	89.6903	90.0663	91.8832	91.0928	95.4974		90.9878	1.07256		89.0744	92.5519	82.963	81.5495	92.743	93.3548	93.5406	83.5094		88.6608	1.82929			498.109		32747	18303	16680		25655	23206	22905
503.113		96.0705	98.4195	94.1776		96.2226	1.22688		93.2612	96.7096	96.2213	91.3985	96.3868		94.7955	1.05174		87.6445	90.5947	88.8579	91.86	90.8985	95.7646		90.9367	1.14658		88.5119	92.5282	82.0089	80.4685	93.4806	94.4796	93.4193	82.9803		88.4847	2.06195			503.113		32737	18121	16579		25520	23425	23249
508.119		95.6392	98.6205	94.3201		96.1932	1.27195		94.3429	95.661	95.6005	91.3832	96.278		94.6531	0.87584		87.0272	89.7679	89.8868	91.0403	91.0118	95.029		90.6272	1.06367		88.6187	92.712	82.4326	80.9393	93.5114	93.3168	93.4193	83.2869		88.5296	1.94301			508.119		32590	18158	16694		25816	23171	23099
513.121		94.7265	98.5499	94.998		96.0915	1.2317		94.6207	97.1679	94.5658	91.2384	96.5502		94.8286	1.03532		87.1257	89.7771	89.4642	90.6459	90.824	94.5804		90.4029	0.995006		88.7504	92.7566	82.2982	79.8332	93.3639	93.2987	93.3766	82.8195		88.3121	2.04507			513.121		32279	18145	16569		25892	23536	22849
518.125		95.2811	98.4032	93.7731		95.8192	1.36339		93.6522	95.4298	94.8721	91.227	95.2881		94.0938	0.782002		88.0144	89.0371	89.798	90.3341	90.8046	95.0257		90.5023	0.990174		88.1381	92.1187	81.5542	80.9668	92.9653	93.1375	93.1497	82.7018		88.0915	1.95288			518.125		32468	18118	16625		25627	23115	22923
523.13		95.3017	98.6639	93.9213		95.9623	1.40836		94.1894	96.7385	96.2545	91.0955	96.179		94.8914	1.04473		87.3927	88.6899	88.5748	92.1281	90.756	94.1615		90.2838	1.04051		88.1381	92.5807	81.6231	81.0125	92.6527	93.4001	93.2531	82.4587		88.1399	1.97956			523.13		32475	18166	16607		25774	23432	23257
528.138		95.0933	99.1256	94.3428		96.1872	1.48505		93.8861	95.7518	94.4582	90.9316	96.0503		94.2156	0.913182		86.4098	89.165	88.7903	90.9913	90.5325	94.6497		90.0898	1.1238		87.921	91.5175	81.4715	80.7793	93.0909	93.9453	93.089	82.1353		87.9937	2.02084			528.138		32404	18251	16648		25691	23193	22823
533.143		95.1197	98.7237	94.5195		96.1209	1.31284		93.6632	96.3215	95.1991	90.8516	95.4712		94.3013	0.963423		86.6506	89.0508	88.6678	90.365	90.6232	94.3825		89.9566	1.05847		87.775	92.2919	81.8952	81.049	92.34	93.3114	92.8689	82.2101		87.9677	1.92874			533.143		32413	18177	16663		25630	23331	23002
538.147		95.1227	99.0061	94.5024		96.2104	1.40928		94.0835	96.111	95.1329	90.7277	95.6593		94.3429	0.964878		86.2675	89.2723	88.7713	91.6177	90.5681	94.023		90.0867	1.08089		88.6472	92.5545	82.5393	79.1338	92.4391	93.1628	92.8756	81.6081		87.8701	2.07211			538.147		32414	18229	16740		25745	23280	22986
543.153		95.7712	98.0285	94.6961		96.1652	0.981948		93.327	96.1275	96.0599	90.7563	94.9441		94.243	1.00847		86.4821	88.6511	88.2347	90.6614	90.4353	93.9933		89.743	1.05655		87.8889	93.1819	81.5025	80.1577	92.2982	93.2498	92.8644	81.023		87.7708	2.1067			543.153		32635	18049	16497		25538	23284	23210
548.159		95.3369	98.1805	93.813		95.7768	1.27984		93.9154	96.4949	94.3548	90.844	95.543		94.2304	0.960041		86.4142	88.6191	88.5199	90.5918	90.2896	94.0328		89.7446	1.05297		87.4439	92.5151	81.6954	79.3989	92.58	92.2808	92.7812	80.9893		87.4606	2.08483			548.159		32487	18077	16628		25699	23373	22798
553.161		95.466	99.6904	94.1321		96.4295	1.67532		94.6645	95.983	95.1867	90.6534	95.882		94.4739	0.984903		86.0376	89.5784	88.4333	91.2104	90.3705	93.4787		89.8515	1.03125		87.8106	91.8588	81.6644	79.4195	93.2626	92.9129	92.6532	81.0641		87.5808	2.10812			553.161		32531	18355	16573		25904	23249	22999
558.167		94.7558	98.9735	94.2517		95.9937	1.497		94.0908	95.822	94.7893	90.6763	95.2658		94.1288	0.908772		87.7736	88.5575	88.9931	89.8521	90.0758	93.7162		89.828	0.850719		87.6611	92.3444	82.25	80.1508	92.0582	93.3874	92.7048	80.4995		87.632	2.05489			558.167		32289	18223	16531		25747	23210	22903
563.17		94.4741	98.3543	94.189		95.6725	1.34344		93.5536	95.5371	94.8556	90.5048	95.0307		93.8963	0.908825		86.609	88.6739	88.5981	90.3521	90.147	93.1257		89.5843	0.896321		87.5614	91.2077	81.1822	79.52	91.3955	92.7155	92.4105	80.4266		87.0524	2.03656			563.17		32193	18109	16556		25600	23141	22919
568.174		95.3868	98.2837	93.9554		95.8753	1.27312		93.9738	95.6403	94.4707	90.4876	95.1544		93.9454	0.91015		86.3441	87.9065	88.9783	90.1794	90.2151	93.2313		89.4758	0.960256		87.1769	93.1347	81.5163	80.0434	92.0142	93.1737	92.5431	80.3817		87.498	2.12103			568.174		32504	18096	16675		25715	23166	22826
573.18		94.0662	97.8764	93.9554		95.2993	1.28891		94.0469	96.4536	94.1271	90.4057	95.8869		94.1841	1.05709		86.6178	88.8818	87.8354	91.4141	90.1535	92.7365		89.6065	0.930197		88.0883	92.3234	81.1167	78.7864	91.2259	92.6557	92.4285	79.8022		87.0534	2.16588			573.18		32054	18021	16460		25735	23363	22743
578.194		94.5622	98.3109	93.5111		95.4614	1.4567		94.0981	96.6931	95.7578	90.2837	95.4415		94.4548	1.12264		85.1138	88.8338	87.7741	90.7362	90.0305	92.4957		89.164	1.0451		87.4724	92.1607	80.4554	79.6069	91.7676	92.3895	92.3072	79.7087		86.9835	2.14413			578.194		32223	18101	16486		25749	23421	23137
583.198		94.4066	98.1316	94.0124		95.5169	1.31232		93.5792	96.3009	93.3822	90.1122	94.8847		93.6518	1.0282		85.7093	88.071	88.8135	90.0866	89.8912	93.0433		89.2691	0.993564		86.6572	91.717	79.8216	78.647	91.6729	93.3005	92.3251	79.5349		86.7095	2.2702			583.198		32170	18068	16560		25607	23326	22563
588.202		95.0904	98.7237	94.0352		95.9498	1.42001		93.5353	94.8807	93.8871	90.1637	94.7956		93.4525	0.861849		85.8144	87.7421	88.8452	90.7929	89.781	92.8553		89.3051	0.998054		87.4119	90.2993	81.4405	79.8492	92.0076	92.5887	92.1769	79.0432		86.8521	2.06736			588.202		32403	18177	16591		25595	22982	22685
593.206		94.5005	98.1534	93.7731		95.4757	1.35521		91.2549	97.0977	93.5146	90.1808	94.7931		93.3682	1.23665		85.4225	87.4269	88.1375	90.7774	89.9786	93.1422		89.1475	1.11298		86.5005	92.9404	81.1822	79.4355	91.0718	93.1972	92.0847	78.3272		86.8425	2.24589			593.206		32202	18072	16588		24971	23519	22595
598.211		94.9378	98.3326	93.6136		95.628	1.40529		93.4403	96.5114	95.108	90.1294	94.5679		93.9514	1.07565		85.3722	87.1117	88.6086	89.9242	89.6547	92.2879		88.8266	0.979672		86.5076	90.9451	80.104	79.4561	91.8138	92.4746	92.0713	77.9683		86.4176	2.22804			598.211		32351	18105	16622		25569	23377	22980
603.215		95.1285	98.2511	93.0154		95.465	1.52075		92.026	96.2101	94.4086	89.9103	94.7213		93.4553	1.11154		85.2912	87.5594	88.2157	90.4887	89.7843	92.3308		88.945	1.00587		86.9242	90.4306	80.793	79.7395	91.0344	91.377	92.0645	78.3179		86.3351	2.05263			603.215		32416	18090	16467		25182	23304	22811
608.22		94.4947	98.3054	93.3858		95.3953	1.48988		93.0273	95.3183	94.0113	89.9312	95.3475		93.5271	0.998417		85.2802	88.2811	88.5664	89.5247	89.5543	91.6843		88.8152	0.858769		86.2086	91.0291	80.5656	79.2618	91.3933	92.1486	91.8354	77.8804		86.2903	2.18137			608.22		32200	18100	16523		25456	23088	22715
613.225		95.1432	97.9741	94.6448		95.9207	1.03675		93.1479	95.083	94.5452	89.9331	94.7312		93.4881	0.947628		85.2693	88.5164	88.2157	89.6098	89.6159	91.5589		88.7976	0.852856		87.1307	91.5122	81.4853	79.9132	91.0014	91.7012	91.7657	77.2354		86.4681	2.13358			613.225		32421	18039	16544		25489	23031	22844
618.229		94.9466	97.9633	93.0781		95.3293	1.42315		91.7665	95.4257	93.8043	89.7387	94.4664		93.0403	1.02054		85.8012	87.5046	87.7952	90.5841	89.4377	91.3973		88.7534	0.856402		86.3154	90.4831	79.7251	79.5841	90.4972	92.0001	91.8039	77.1382		85.9434	2.19232			618.229		32354	18037	16533		25111	23114	22665
623.234		94.706	98.4249	93.5054		95.5454	1.48088		92.5815	95.6321	93.1587	89.7387	93.7958		92.9814	0.959046		85.9391	88.0459	87.8312	89.7412	89.6126	91.8492		88.8365	0.827198		86.3332	92.1292	79.7699	79.2687	91.9724	91.7574	91.6421	77.3625		86.2794	2.30075			623.234		32272	18122	16492		25334	23164	22509
628.239		94.6062	98.2892	93.6193		95.5049	1.42099		92.4207	95.4463	93.1049	89.5749	94.1818		92.9457	0.986012		85.7377	87.9545	87.6664	89.4603	89.4863	91.869		88.6957	0.849269		86.5966	90.8611	79.887	79.3258	91.1225	91.205	91.6354	77.4485		86.0102	2.17172			628.239		32238	18097	16492		25290	23119	22496
633.242		94.4418	98.1316	93.1123		95.2286	1.50141		91.8762	95.5743	94.243	89.5844	93.7661		93.0088	1.04134		85.0766	87.0044	87.8248	90.6588	89.4636	91.2917		88.5533	0.962255		85.55	91.5385	80.1006	79.4492	91.2656	92.0924	91.3231	76.9438		86.0329	2.25111			633.242		32182	18068	16414		25141	23150	22771
638.246		94.8585	98.5879	93.0268		95.4911	1.63619		92.735	94.8229	92.7986	89.5977	94.1076		92.8124	0.896098		85.162	87.2031	87.584	88.8597	89.2239	91.0509		88.1806	0.820811		86.2905	91.1289	77.9649	78.7544	90.55	92.0671	91.2961	76.4727		85.5656	2.38399			638.246		32324	18152	16502		25376	22968	22422
643.249		94.6619	98.2457	92.6052		95.171	1.64803		92.6107	95.2357	94.4872	89.2833	93.7166		93.0667	1.04083		84.1747	88.2309	88.0762	89.3675	89.2952	91.9712		88.5193	1.03911		85.2189	91.1709	80.3624	78.9098	90.8737	92.1685	91.3478	75.8969		85.7436	2.31976			643.249		32257	18089	16506		25342	23068	22830
648.255		95.1344	97.8764	92.4742		95.1617	1.55953		92.9652	95.3844	93.1007	89.3024	94.266		93.0037	1.024		85.3065	87.5525	87.9938	89.1716	89.1203	91.6051		88.4583	0.852827		86.2157	91.0869	79.8663	78.7978	91.1819	91.6958	91.3029	76.1642		85.789	2.31153			648.255		32418	18021	16460		25439	23104	22495
653.261		94.0251	98.3326	93.4142		95.2573	1.54772		92.7167	95.9417	93.2042	89.1652	93.7686		92.9593	1.0969		84.6891	86.6275	87.9537	88.8648	89.1268	91.2884		88.0917	0.924273		85.4503	87.4009	79.5494	78.695	90.6381	91.915	91.1928	75.5267		85.046	2.24845			653.261		32040	18105	16432		25371	23239	22520
658.268		94.6473	97.317	92.8331		94.9325	1.3022		94.4197	94.0756	93.6015	89.1233	93.7537		92.9948	0.978041		85.0876	86.9176	87.0389	89.1767	89.1397	90.6617		88.0037	0.823524		85.9345	85.7732	79.5908	78.8184	89.6737	91.051	91.0131	75.3996		84.6568	2.133			658.268		32252	17918	16327		25837	22787	22616
663.275		93.6436	98.1697	92.7591		94.8575	1.67568		92.0443	95.3018	92.2606	89.0509	94.0507		92.5416	1.05848		84.3411	87.838	87.9896	90.4062	88.7575	90.9256		88.3763	0.957203		85.8348	85.3295	78.6642	79.1612	90.4619	91.0727	91.0939	74.9827		84.5751	2.22722			663.275		31910	18075	16392		25187	23084	22292
668.279		94.2305	97.7134	92.309		94.751	1.58168		91.7556	94.9591	93.4525	89.0699	93.5928		92.566	1.01111		84.3236	87.9339	88.1544	89.4345	89.0944	90.1174		88.1764	0.838584		85.8775	85.8152	78.4472	79.5795	90.3893	90.9442	91.0939	74.5826		84.5912	2.24584			668.279		32110	17991	16613		25108	23001	22580
673.283		94.3362	98.3869	92.8388		95.1873	1.65717		92.523	96.0821	92.8359	88.9804	93.1103		92.7063	1.12898		84.5009	86.9884	87.1213	88.3158	88.4595	91.2818		87.778	0.909667		85.5963	84.6206	80.2832	79.047	89.7111	91.3281	90.9793	75.0687		84.5793	2.12718			673.283		32146	18115	16338		25318	23273	22431
678.289		94.1719	97.5885	92.5654		94.7752	1.48111		93.0054	95.3844	94.003	88.9784	93.4765		92.9695	1.07439		84.1594	86.8925	87.6262	89.3185	88.7899	90.5363		87.8871	0.909868		85.7173	84.2242	79.6838	78.9807	90.6623	91.1343	90.7794	74.3078		84.4362	2.238			678.289		32090	17968	16413		25450	23104	22713
683.294		94.4154	98.5499	92.5654		95.1769	1.76903		93.2576	95.0582	90.812	88.9118	92.9024		92.1884	1.06112		84.7636	87.5959	86.6143	89.1587	88.8515	90.0647		87.8414	0.790304		85.194	84.7571	78.9156	79.2229	89.8432	91.0492	90.8131	74.4069		84.2753	2.20529			683.294		32173	18145	16433		25519	23025	21942
688.297		94.0339	97.4039	92.9186		94.7855	1.34821		93.2503	95.1532	92.3558	88.7403	93.2736		92.5546	1.05693		84.4462	87.0706	86.2044	89.0633	88.9486	90.3516		87.6808	0.888201		85.4041	83.6072	77.5481	79.6937	90.1515	90.5113	90.8378	74.2443		83.9998	2.25382			688.297		32043	17934	16344		25517	23048	22315
693.304		93.9723	96.9802	92.685		94.5458	1.27265		91.6131	95.1779	92.4634	88.8127	93.5087		92.3152	1.05836		84.0587	86.9313	87.2755	89.785	88.8612	89.4973		87.7348	0.874625		85.2296	84.6233	77.7135	78.9076	89.6671	91.0166	90.6671	73.8535		83.9598	2.29942			693.304		32022	17856	16329		25069	23054	22341
698.293		93.852	97.4745	93.2433		94.8566	1.32068		92.9725	95.0417	91.6439	88.7002	92.7415		92.22	1.03733		83.831	86.6869	85.5178	89.6458	88.7413	90.1669		87.4316	1.02114		85.1264	84.1901	78.4093	79.2824	91.0498	90.3863	90.6963	73.6273		84.096	2.30551			698.293		31981	17947	16255		25441	23021	22143
703.296		93.7258	97.7352	93.568		95.0097	1.36351		91.9566	95.0789	93.3118	88.7193	93.286		92.4705	1.06094		83.7631	87.2899	87.36	88.7514	88.5308	90.0811		87.6294	0.879742		85.2866	84.1376	78.1992	79.6183	90.1603	90.8174	90.5098	73.7657		84.0618	2.26004			703.296		31938	17995	16232		25163	23030	22546
708.309		93.3443	97.1757	93.3573		94.6258	1.275		91.2622	95.3142	92.5834	88.5135	93.1301		92.1607	1.12188		83.68	86.5179	87.1065	88.3957	88.6992	89.7909		87.365	0.877332		85.1655	84.4867	78.8054	79.5589	90.4245	91.0945	90.366	73.3077		84.1512	2.29354			708.309		31808	17892	16397		24973	23087	22370
713.314		93.6172	97.2789	92.3147		94.4036	1.48602		91.9529	93.3614	91.5529	88.4754	92.8678		91.6421	0.854133		83.0998	86.591	86.4432	88.1792	88.4272	90.157		87.1496	0.98232		85.0018	83.5101	77.7996	79.3601	90.1449	90.4533	90.3413	73.5432		83.7693	2.27468			713.314		31901	17911	16295		25162	22614	22121
718.32		94.4976	97.8547	93.1864		95.1795	1.39009		91.2842	95.4587	92.0743	88.3992	92.546		91.9525	1.13431		83.2574	87.0181	87.172	88.5246	88.5761	89.2631		87.3019	0.883555		84.5176	84.022	77.9753	80.0023	90.4047	91.0474	90.3076	72.4402		83.8396	2.37713			718.32		32201	18017	16282		24979	23122	22247
723.325		93.18	97.1703	92.3774		94.2425	1.48211		91.2988	94.2614	90.721	88.2925	93.338		91.5823	1.04655		83.5968	86.1365	86.6586	87.8854	88.5988	89.6193		87.0826	0.868031		84.2862	84.2898	77.7652	79.2115	90.3607	90.7522	90.211	72.315		83.6489	2.39847			723.325		31752	17891	16203		24983	22832	21920
728.329		93.5497	97.6591	92.9186		94.7091	1.48621		91.2988	95.5949	91.9088	88.1991	93.3998		92.0803	1.22061		83.2728	86.052	87.003	88.1998	88.2782	88.8739		86.9466	0.843771		84.4215	84.0877	78.2302	78.9395	89.6935	90.7775	90.1188	72.3748		83.5804	2.34754			728.329		31878	17981	16296		24983	23155	22207
733.337		93.7933	97.0671	91.9387		94.2664	1.49923		90.4912	94.1871	91.7184	88.2258	92.8925		91.503	1.02337		83.0801	86.4814	86.4727	87.3801	88.3008	89.1905		86.8176	0.863095		85.2901	83.686	77.6136	79.7943	90.0986	90.0712	90.1278	71.9916		83.5842	2.37043			733.337		31961	17872	16248		24762	22814	22161
738.342		93.4089	97.2572	91.7735		94.1465	1.62542		92.0333	94.3605	91.6936	88.06	92.5534		91.7402	1.02858		82.9794	86.1822	86.027	88.3828	88.3138	89.2268		86.852	0.935347		83.9017	83.2213	79.2153	79.7669	90.8891	89.747	90.029	72.3075		83.6347	2.29094			738.342		31830	17907	16248		25184	22856	22155
743.33		94.1924	96.7956	92.2065		94.3981	1.32875		91.445	94.633	92.3351	87.938	92.4842		91.767	1.09123		82.5591	86.3078	87.0981	87.5039	88.4077	88.29		86.6944	0.885997		84.9947	83.3998	77.555	79.8606	89.5108	90.0205	89.9526	71.8476		83.3927	2.34064			743.33		32097	17822	16310		25023	22922	22310
748.334		93.7228	97.3224	92.2805		94.4419	1.49922		91.9566	95.244	90.6754	87.9819	92.3134		91.6343	1.18014		84.1331	86.1	86.2171	87.9833	88.1065	88.2702		86.8017	0.663598		84.4856	83.7018	77.7583	79.5726	89.3588	90.4751	89.9211	71.8906		83.3955	2.34636			748.334		31937	17919	16269		25163	23070	21909
753.339		92.9804	97.2952	92.5597		94.2784	1.51328		91.1124	93.9146	91.7805	87.9666	92.7267		91.5002	1.00122		82.1147	86.5567	86.2931	88.1148	88.019	88.1647		86.5438	0.947827		84.6565	83.4156	76.8454	79.3212	89.2378	89.6981	89.537	71.8682		83.0725	2.33265			753.339		31684	17914	16367		24932	22748	22176
758.342		93.403	96.9313	92.1837		94.1727	1.42354		91.1745	95.5825	91.7474	87.8637	92.4594		91.7655	1.23743		82.4387	86.1251	86.0185	88.9396	88.1065	88.4318		86.6767	0.982237		83.5956	82.9063	77.958	79.4012	89.2025	89.4807	89.8582	71.341		82.9679	2.3229			758.342		31828	17847	16424		24949	23152	22168
763.347		93.4176	96.2579	92.2292		93.9683	1.19511		90.5971	94.7445	91.855	87.8713	92.1798		91.4495	1.11991		82.6095	86.2986	85.991	88.2101	88.0028	88.4846		86.5995	0.903666		84.1153	83.9774	77.648	79.3418	89.8763	90.006	89.7437	71.8551		83.3204	2.35075			763.347		31833	17723	16387		24791	22949	22194
768.35		93.6671	96.9151	91.876		94.1527	1.47477		91.6533	94.7733	90.8079	87.797	92.2788		91.4621	1.12979		82.7649	86.3443	86.122	87.5245	87.7858	88.9992		86.5901	0.875945		84.5105	83.7149	77.7927	78.9213	89.557	89.2887	89.6268	71.3316		83.0929	2.34933			768.35		31918	17844	16204		25080	22956	21941
773.354		93.3912	97.3984	91.5684		94.1194	1.72192		90.5058	95.2316	91.1762	87.6046	92.3827		91.3802	1.24298		81.5193	85.6477	86.4516	86.9548	88.0126	88.5044		86.1817	1.02374		83.7487	82.4285	76.7111	79.3578	89.5372	89.459	89.5055	71.0157		82.7204	2.40341			773.354		31824	17933	16357		24766	23067	22030
778.359		93.6436	96.7304	91.8305		94.0682	1.43033		91.0941	94.8889	89.9594	87.6065	91.9001		91.0898	1.19376		82.3161	86.205	86.46	87.4858	87.8377	87.594		86.3164	0.843592		83.3535	82.4311	78.2818	78.5053	88.4847	89.1203	89.656	71.1241		82.6196	2.29376			778.359		31910	17810	16215		24927	22984	21736
783.364		93.0538	97.0182	91.0158		93.6959	1.76226		91.1489	94.5422	90.5347	87.637	92.4025		91.2531	1.13451		82.0293	86.4014	86.4199	87.9859	87.9672	87.8414		86.4409	0.933487		83.6953	83.8304	76.9522	79.2709	88.1391	89.2362	89.5302	70.6736		82.666	2.35526			783.364		31709	17863	16310		24942	22900	21875
788.369		93.7669	97.0834	91.8475		94.2326	1.5293		91.6533	92.9651	91.9377	87.4178	91.5066		91.0961	0.954205		81.6769	86.0063	85.9974	88.2101	87.7632	87.5016		86.1926	0.978353		83.8163	83.2686	77.3036	79.3349	88.4891	89.5133	89.5145	70.8549		82.7619	2.34773			788.369		31952	17875	16138		25080	22518	22214
793.378		93.849	97.1377	90.9702		93.9857	1.78173		91.4523	94.1623	90.721	87.3492	91.5264		91.0422	1.09268		82.3599	85.9561	85.7439	87.0657	87.7794	87.2905		86.0326	0.801641		82.8302	82.418	77.1003	78.7887	88.7424	89.2272	89.4269	70.496		82.3787	2.38757			793.378		31980	17885	16109		25025	22808	21920
798.383		93.1623	97.2898	91.8362		94.0961	1.64211		90.535	93.8816	90.6879	87.3969	92.2466		90.9496	1.07567		81.8695	85.9812	85.8558	86.8363	87.7016	87.6699		85.9857	0.884385		83.5956	83.7674	77.5722	78.6127	89.3963	89.2217	89.4021	70.1987		82.7209	2.4404			798.383		31746	17913	16185		24774	22740	21912
803.389		93.5849	97.0943	91.876		94.1851	1.53598		90.3048	93.3243	89.4959	87.1549	92.0635		90.4686	1.06424		82.5088	85.0904	85.9699	87.0992	87.5818	87.2575		85.9179	0.780347		83.2752	83.3631	78.1027	79.0584	89.2972	89.5188	89.1954	70.7072		82.8148	2.35697			803.389		31890	17877	16198		24711	22605	21624
808.392		92.8601	96.4588	91.9501		93.7563	1.37655		89.8407	94.6825	89.231	87.1396	91.8655		90.5519	1.27831		82.2811	84.8164	86.1727	87.1688	87.679	87.4489		85.9278	0.846837		83.6881	83.6388	76.8868	79.5063	88.5156	88.7219	89.1325	70.281		82.5464	2.35795			808.392		31643	17760	16247		24584	22934	21560
813.398		92.775	96.7358	91.7279		93.7462	1.52505		90.1549	93.4811	90.7582	87.1053	91.5413		90.6082	1.03977		81.5236	85.8578	85.4185	87.6585	87.4328	86.776		85.7779	0.922059		83.2823	84.4867	76.0222	79.2458	88.9801	88.8849	89.1573	69.7388		82.4748	2.48937			813.398		31614	17811	16181		24670	22643	21929
818.409		92.7163	96.1927	91.5969		93.502	1.38364		90.0344	93.477	91.1266	86.9414	91.4398		90.6038	1.07156		81.69	86.9199	86.1474	87.6095	87.4328	86.4527		86.0421	0.899661		83.3998	85.9071	77.4896	79.0675	88.2492	88.5806	89.0359	69.5257		82.6569	2.4282			818.409		31594	17711	16189		24637	22642	22018
823.413		92.8278	96.9422	92.1723		93.9808	1.49277		90.1623	93.5472	90.4685	87.0062	91.6056		90.558	1.068		81.655	84.7775	84.9981	86.6017	87.3907	86.4263		85.3082	0.836337		83.4959	87.0701	76.2702	79.4744	88.1501	89.0841	89.164	69.8323		82.8176	2.4971			823.413		31632	17849	16127		24672	22659	21859
828.416		93.673	95.9754	91.8589		93.8358	1.19112		89.5154	93.8155	90.8451	86.7604	91.4596		90.4792	1.16156		81.1712	86.0177	86.4347	87.4678	87.3972	87.3202		85.9681	0.989108		82.6913	87.2381	75.8258	78.8938	88.0532	88.9066	88.7978	69.6192		82.5032	2.52663			828.416		31920	17671	16073		24495	22724	21950
833.42		93.5644	96.9205	91.7393		94.0747	1.51729		89.7968	93.4935	90.9113	86.9014	91.4571		90.5121	1.08374		80.486	85.9835	85.4734	86.38	87.3227	86.3273		85.3288	0.999667		83.5991	87.1331	75.4779	77.9705	88.7798	89.1167	88.6967	69.7725		82.5683	2.59142			833.42		31883	17845	16119		24572	22646	21966
838.426		92.6194	96.2524	91.8646		93.5788	1.35444		90.323	94.3399	89.5456	86.7871	90.6182		90.3228	1.21098		81.3967	85.3645	85.0488	86.1377	87.3713	86.6935		85.3354	0.860803		83.1506	88.7582	76.4355	79.6549	89.4711	88.6675	88.6652	69.021		82.978	2.63548			838.426		31561	17722	15976		24716	22851	21636
843.429		92.3436	95.5844	92.5255		93.4845	1.05127		89.6616	94.6247	89.798	86.789	90.6801		90.3107	1.26162		81.6397	85.6477	85.9826	86.6146	87.151	86.334		85.5616	0.812357		83.4247	87.8813	75.5193	79.4149	87.8683	88.7273	88.7753	69.2042		82.6019	2.57646			843.429		31467	17599	16122		24535	22920	21697
848.433		93.2298	96.1275	92.5768		93.978	1.09115		89.7493	93.4275	89.8932	86.5508	91.1701		90.1582	1.1172		80.9151	85.6728	84.0728	87.8493	87.0992	86.136		85.2909	1.02155		83.0082	86.65	75.9877	78.5602	88.4055	88.6331	88.5371	68.8508		82.3291	2.57188			848.433		31769	17699	15968		24559	22630	21720
853.437		92.8483	95.7962	91.7108		93.4518	1.21734		90.345	94.055	88.8337	86.5051	91.1329		90.1743	1.25036		81.2828	84.6245	85.184	86.3285	86.9243	85.8227		85.0278	0.819186		82.5952	87.7973	75.8086	78.5967	88.4429	88.7997	88.6338	68.8078		82.4353	2.63273			853.437		31639	17638	16120		24722	22782	21464
858.442		92.772	95.8016	92.0754		93.5497	1.14379		90.535	93.2582	90.6009	86.5508	90.586		90.3062	1.07319		80.6677	85.8236	84.4636	85.9857	87.0506	86.6572		85.1081	0.958952		82.791	87.7501	75.3574	78.3613	87.6591	88.2039	88.4293	69.2397		82.224	2.55415			858.442		31613	17639	16127		24774	22589	21891
863.45		92.5197	96.1384	91.8874		93.5152	1.32425		89.5337	93.4233	89.8849	86.5432	90.8706		90.0512	1.11005		80.8954	84.6474	85.2558	86.6094	87.0376	86.0833		85.0881	0.911171		83.1898	87.2092	74.944	79.0584	87.1857	87.5102	88.4742	68.5069		82.0098	2.56426			863.45		31527	17701	16140		24500	22629	21718
868.455		92.4346	96.2036	91.5342		93.3908	1.43021		88.6018	94.0426	90.0132	86.4079	91.0389		90.0209	1.2704		80.5101	85.5724	85.1291	85.2408	86.9016	85.8095		84.8606	0.907677		83.0829	87.5138	76.0807	79.1704	88.6036	88.5534	88.4945	68.6527		82.519	2.60271			868.455		31498	17713	16101		24245	22779	21749
873.461		92.5784	96.1221	91.312		93.3375	1.43949		90.1074	93.2128	90.3112	86.2707	90.5514		90.0907	1.10907		80.1861	85.0311	84.8291	86.411	86.6911	86.2713		84.9033	0.993555		82.8943	88.5508	74.6375	78.6013	87.6084	87.6189	88.1732	68.4134		82.0622	2.65643			873.461		31547	17698	16078		24657	22578	21821
878.465		93.2122	95.6496	92.0811		93.6476	1.05288		88.9271	93.6009	88.6433	86.1163	90.784		89.6143	1.24321		80.3984	85.4011	83.9502	86.5888	86.8498	85.5588		84.7912	0.973551		82.5845	88.0572	75.5606	78.3362	88.1214	87.7547	88.3686	68.1292		82.1141	2.65708			878.465		31763	17611	16179		24334	22672	21418
883.47		92.7398	95.4106	91.8532		93.3345	1.06911		89.6287	93.3655	88.5316	86.185	90.8508		89.7123	1.19343		80.88	84.3573	83.8213	86.8028	86.5842	84.7869		84.5388	0.881379		82.7056	87.2276	74.8924	77.8928	88.0796	88.2763	88.1732	68.576		81.9779	2.63857			883.47		31602	17567	16124		24526	22615	21391
888.474		92.8249	97.0889	92.0014		93.9717	1.57661		89.8809	92.4944	89.5373	86.1526	90.3781		89.6887	1.02254		80.6699	85.3097	84.7932	85.8156	86.5939	84.9815		84.694	0.847204		82.7127	86.5214	74.6788	78.4825	88.0466	88.0137	88.2451	68.1311		81.854	2.64179			888.474		31631	17876	16103		24595	22404	21634
893.478		92.7662	96.3774	91.1981		93.4472	1.53341		89.5556	94.2366	88.8544	86.002	90.7889		89.8875	1.34168		79.4221	85.4033	85.0826	85.3696	86.5809	84.6748		84.4222	1.03314		82.4528	87.5715	75.5227	78.0505	88.1369	87.6496	88.2743	68.0769		81.9669	2.64437			893.478		31611	17745	16125		24506	22826	21469
898.482		92.684	95.5084	90.9417		93.0447	1.33055		88.4593	92.9279	88.4157	85.8896	90.2618		89.1909	1.16505		80.7728	85.529	84.8608	85.6738	86.6425	84.6088		84.6813	0.833943		82.1965	87.3169	74.4205	79.3464	87.3332	87.8887	88.1777	68.1274		81.8509	2.62663			898.482		31583	17585	16241		24206	22509	21363
903.486		92.6136	95.4812	91.2551		93.1166	1.24564		89.1792	93.1715	89.8187	85.8934	90.393		89.6912	1.16848		79.8314	85.9401	84.7446	86.4342	86.5712	85.0079		84.7549	1.03002		82.549	87.1646	74.9475	78.0276	87.2209	87.9684	88.0114	68.161		81.7563	2.61367			903.486		31559	17580	16250		24403	22568	21702
908.489		93.0186	96.3393	91.5399		93.6326	1.41909		89.6762	92.3087	88.6185	85.8038	89.8263		89.2467	1.05223		79.444	85.6409	84.6495	85.3258	86.4838	85.0673		84.4352	1.02959		82.3852	86.5739	74.3722	78.311	87.0844	88.3397	87.971	67.3496		81.5484	2.69774			908.489		31697	17738	16098		24539	22359	21412
913.497		92.2321	95.7854	91.7621		93.2598	1.27003		89.3583	92.4738	88.6392	85.8877	90.101		89.292	1.06766		79.0937	84.7798	84.2988	85.0345	86.5453	84.6847		84.0728	1.04491		82.6736	86.3376	74.8889	78.6927	86.851	87.1117	87.9373	67.7329		81.5282	2.56159			913.497		31429	17636	16162		24452	22399	21417
918.5		92.4228	95.6224	90.9816		93.0089	1.37137		89.0513	93.0476	89.1565	85.6209	90.44		89.4633	1.20061		80.4619	86.052	84.4214	85.4521	86.5388	84.8661		84.632	0.89095		82.1858	86.566	74.6581	77.6186	87.3949	87.7529	87.8991	67.5684		81.4555	2.66218			918.5		31494	17606	16129		24368	22538	21542
923.504		92.1851	95.7962	91.2038		93.0617	1.3963		89.1134	92.5481	88.3743	85.8058	90.7122		89.3108	1.13238		80.1357	85.1293	84.4826	85.6506	86.6166	84.2294		84.374	0.916967		82.937	87.1121	74.9371	78.8207	87.4235	87.5392	87.8721	67.2562		81.7372	2.6673			923.504		31413	17638	16067		24385	22417	21353
928.509		92.1382	95.7147	91.0386		92.9638	1.41161		89.2815	94.4307	87.5135	85.478	89.955		89.3317	1.49244		79.4264	85.0676	84.6432	86.5631	86.3769	84.5956		84.4455	1.06229		82.3852	85.403	75.3126	77.3489	87.0668	88.1079	87.8294	67.1982		81.3315	2.64089			928.509		31397	17623	16028		24431	22873	21145
933.512		92.2233	96.8282	90.9189		93.3235	1.79235		88.1012	92.7793	88.4861	85.6667	89.3338		88.8734	1.15103		80.0985	84.9237	84.5249	85.4057	86.338	83.9755		84.211	0.885552		81.7907	86.3718	74.7511	78.9487	86.7608	87.3888	87.9036	67.1795		81.3869	2.61932			933.512		31426	17828	16163		24108	22473	21380
938.519		92.954	96.0461	90.862		93.2873	1.50577		88.7663	93.7412	88.5854	85.5466	89.6308		89.254	1.31733		79.5863	85.1658	83.5509	85.1479	86.2182	83.9853		83.9424	0.953247		82.5952	85.9202	74.7787	78.6333	86.3821	86.9632	87.7193	67.23		81.2778	2.5695			938.519		31675	17684	16123		24290	22706	21404
943.528		92.6077	95.9211	90.8278		93.1189	1.49238		89.0403	93.4894	88.573	85.356	89.7619		89.2441	1.30191		78.8113	84.9123	84.1382	84.8232	86.3089	83.4246		83.7364	1.05982		82.0043	86.7314	74.0415	77.2095	87.4455	86.6807	87.6025	67.2281		81.1179	2.68464			943.528		31557	17661	16149		24365	22645	21401
948.532		92.1294	95.6333	91.1126		92.9584	1.36926		89.2815	91.0164	88.991	85.2436	89.8213		88.8708	0.970742		79.5906	84.5583	84.6326	85.5088	86.3315	83.451		84.0121	0.968979		81.3955	86.2536	73.3216	77.5294	87.3464	87.5211	87.625	66.5607		80.9442	2.78362			948.532		31394	17608	16008		24431	22046	21502
953.536		92.8659	95.8125	90.3207		92.9997	1.58675		89.6872	92.383	88.1757	85.3446	89.7644		89.071	1.15146		79.1309	84.9077	83.8594	85.2949	85.9655	83.8765		83.8392	0.999198		81.6839	85.6813	74.014	78.0985	87.4147	87.1932	87.5733	66.9926		81.0814	2.6675			953.536		31645	17641	15963		24542	22377	21305
958.543		92.5696	96.2524	90.5543		93.1254	1.66822		89.4606	92.6513	88.4943	85.2246	89.8287		89.1319	1.19695		78.1173	85.1316	84.1784	84.2484	86.0238	83.9689		83.6114	1.14266		81.9972	86.7209	74.2	77.6208	86.6969	86.1265	87.4834	67.0524		80.9873	2.62776			958.543		31544	17722	16018		24480	22442	21382
963.546		91.7684	96.0895	90.1099		92.656	1.78228		88.5799	92.5646	88.0184	85.1617	88.9354		88.652	1.18275		79.2272	84.9762	83.7812	84.702	86.1178	83.6192		83.7373	0.97449		82.1431	86.3508	73.8555	78.4505	86.7563	87.3345	87.4542	66.6131		81.1197	2.7034			963.546		31271	17692	16068		24239	22421	21267
968.553		92.5637	95.579	91.3462		93.163	1.2581		88.2656	92.9609	88.4198	85.1693	90.0589		88.9749	1.27195		79.1309	83.6676	84.115	85.4134	86.0724	83.6225		83.6703	0.99356		82.1004	86.6737	74.014	78.7407	86.4085	87.2838	87.5239	66.1719		81.1146	2.73331			968.553		31542	17598	16107		24153	22517	21364
973.557		91.5806	94.4819	90.241		92.1011	1.2516		88.7041	92.0403	87.9853	85.0455	90.1257		88.7802	1.16243		79.0499	84.138	83.7347	84.4005	85.7518	83.009		83.3473	0.935379		81.6483	85.8126	73.9795	78.1008	86.6352	86.9397	87.407	65.9494		80.8091	2.72419			973.557		31207	17396	15970		24273	22294	21259
978.563		92.1176	96.1275	91.1012		93.1155	1.53435		87.4616	92.5068	89.4669	85.0207	90.0688		88.905	1.26124		79.3608	83.8	83.5594	84.4494	85.7097	83.1178		83.3329	0.875389		81.6661	85.7732	73.9141	78.2036	87.0624	86.8401	87.2902	65.8541		80.8255	2.74134			978.563		31390	17699	16009		23933	22407	21617
983.569		92.0384	95.3346	90.6797		92.6842	1.38201		88.1085	92.222	86.4498	84.893	89.5466		88.244	1.26467		78.391	83.6607	84.0474	84.4108	85.8781	83.7182		83.351	1.04605		82.3709	86.5897	74.5996	77.3329	86.7255	85.8367	87.3846	65.8672		80.8384	2.71658			983.569		31363	17553	15980		24110	22338	20888
988.573		92.6752	95.3997	90.4917		92.8555	1.41971		88.357	91.6646	88.424	84.9502	89.1185		88.5028	1.07296		79.4527	84.3253	83.0439	84.8696	85.8619	83.7742		83.5546	0.908869		81.1997	86.461	74.1277	78.7064	86.1971	86.342	87.2745	66.3252		80.8292	2.64705			988.573		31580	17565	15959		24178	22203	21365
993.576		91.3487	95.4758	89.7852		92.2032	1.69738		88.7845	93.4151	85.3406	84.872	89.2596		88.3344	1.54633		78.0954	83.9668	83.8045	84.1324	85.7161	83.5137		83.2048	1.0694		82.0292	85.7259	73.3905	78.2836	85.7215	86.7205	87.234	65.8447		80.6188	2.70936			993.576		31128	17579	15949		24295	22627	20620
998.579		91.6129	94.7806	90.9132		92.4356	1.18978		87.8673	91.1733	87.919	84.8606	89.1853		88.2011	1.02841		78.1086	84.1243	83.1073	84.2278	85.5477	83.5236		83.1065	1.05524		81.8761	84.9541	73.6144	72.0283	86.567	86.351	87.079	65.8821		79.794	2.88139			998.579		31218	17451	15943		24044	22084	21243
1003.58		91.7449	94.9652	90.5885		92.4329	1.30944		88.3387	91.9949	87.8404	84.5538	89.5738		88.4603	1.21229		78.3428	84.2157	83.4812	84.5087	85.5477	83.0749		83.1952	1.03187		81.723	85.8913	72.6603	74.6589	86.8422	87.0918	87.1397	65.8335		80.2301	2.89219			1003.58		31263	17485	15993		24173	22283	21224
1008.59		91.6334	96.5675	90.1214		92.7741	1.94627		89.1829	92.1476	86.0442	84.6967	88.6136		88.137	1.29656		78.0998	83.4049	82.9045	83.7277	85.5671	83.2564		82.8267	1.01964		82.1395	85.8861	73.4009	75.3011	85.7942	86.5249	86.8903	65.6054		80.1928	2.78831			1008.59		31225	17780	15854		24404	22320	20790
1013.59		91.4837	95.0793	90.674		92.4123	1.35382		88.2693	90.0999	86.7395	84.4909	88.9428		87.7085	0.970783		78.6778	82.9321	82.9425	83.7148	85.4408	82.6197		82.7213	0.909886		81.4881	85.6157	72.3812	75.925	86.4591	86.371	86.9644	65.5531		80.0947	2.82797			1013.59		31174	17506	15895		24154	21824	20958
1018.6		91.8682	95.8234	90.0017		92.5644	1.71625		88.24	91.1609	87.6914	84.3785	89.1556		88.1253	1.10717		78.4172	84.0353	83.4876	84.0757	85.4376	82.2404		82.949	0.999523		81.1534	87.0123	72.9703	75.244	86.12	85.4074	86.8409	64.9324		79.9601	2.87555			1018.6		31305	17643	15817		24146	22081	21188
1023.6		92.2526	95.6604	90.5999		92.8376	1.48985		87.1985	91.5118	86.1601	84.489	89.0071		87.6733	1.20765		77.8065	83.9713	83.42	84.2819	85.3145	82.4977		82.882	1.08415		81.3528	86.524	73.6385	75.9022	85.0874	85.3132	86.9083	65.2633		79.9987	2.74076			1023.6		31436	17613	16034		23861	22166	20818
1028.6		91.833	95.6767	89.7112		92.407	1.74586		87.6992	92.3458	86.3256	84.4509	89.2769		88.0197	1.34172		78.2487	83.4689	82.9023	82.6245	85.2918	82.5703		82.5177	0.948456		81.9936	86.293	72.7705	76.1399	86.3226	85.7588	86.6094	64.9212		80.1011	2.84998			1028.6		31293	17616	15840		23998	22368	20858
1033.61		91.3722	95.2857	90.748		92.4686	1.42		87.5201	91.0825	85.8042	84.3804	88.5839		87.4742	1.15356		78.3603	83.8777	82.9298	83.3127	85.2011	82.8111		82.7488	0.946953		81.5557	84.9987	72.5776	76.485	85.9857	86.3529	86.5555	64.7866		79.9122	2.82022			1033.61		31136	17544	15991		23949	22062	20732
1038.61		91.6686	95.8614	89.9732		92.5011	1.74999		87.1876	92.255	85.7793	84.1518	88.7794		87.6306	1.38619		78.4566	83.5259	83.327	83.8824	85.1493	82.1316		82.7455	0.944973		81.4311	86.6107	72.2814	76.4027	85.323	85.7733	86.6005	65.3044		79.9659	2.8013			1038.61		31237	17650	15917		23858	22346	20726
1043.62		92.1499	95.3943	90.748		92.7641	1.37597		88.1121	93.3119	86.0566	84.3023	88.4454		88.0457	1.51437		77.8065	84.4281	82.727	83.6478	85.1688	81.9204		82.6164	1.07226		82.3959	85.0748	72.6568	75.8885	84.9355	86.6553	86.4477	64.7417		79.8495	2.81951			1043.62		31401	17564	15884		24111	22602	20793
1048.62		91.6099	95.579	90.1441		92.4443	1.62343		87.8234	90.455	85.8124	84.2546	88.6928		87.4077	1.0862		78.2837	83.2793	82.9087	82.9931	85.0813	82.0821		82.438	0.923928		81.7907	85.8598	71.7268	77.0129	85.7391	85.7063	86.4522	64.6146		79.8628	2.8617			1048.62		31217	17598	15760		24032	21910	20734
1053.63		91.6393	94.6285	88.9933		91.7537	1.62774		87.6663	90.6118	86.2511	84.1708	88.9131		87.5226	1.10337		77.5438	83.631	83.5214	83.1658	84.9712	81.8611		82.449	1.0619		82.0399	85.3662	72.984	75.829	85.7501	85.1955	86.6072	65.0072		79.8474	2.76421			1053.63		31227	17423	15958		23989	21948	20840
1058.63		92.1235	95.7256	90.1669		92.672	1.62792		86.9829	90.7976	86.1352	84.1441	88.4973		87.3114	1.11989		77.8919	83.9759	82.4735	83.3462	85.0133	81.6862		82.3978	1.01729		81.0466	84.87	72.5707	75.8565	84.5061	85.4944	86.4589	64.7343		79.4422	2.73842			1058.63		31392	17625	15901		23802	21993	20812
1063.64		90.7119	94.6991	90.1612		91.8574	1.42971		88.0683	92.0486	86.3422	84.0622	88.3538		87.775	1.31381		76.9987	83.6401	83.8763	82.609	85.0878	81.3366		82.2581	1.17146		81.659	85.5736	72.7533	75.8793	86.7476	86.4144	86.4477	64.7006		80.0219	2.88354			1063.64		30911	17436	15819		24099	22296	20862
1068.64		91.56	95.2911	90.3321		92.3944	1.49108		87.2935	91.7678	84.6826	84.0279	88.5938		87.2731	1.39981		78.4151	83.7064	82.6087	82.3874	84.9776	81.584		82.2799	0.910195		81.2282	84.8753	71.9369	76.2016	84.9047	85.2064	86.4634	64.4426		79.4074	2.7931			1068.64		31200	17545	15916		23887	22228	20461
1073.64		90.9878	95.3834	90.3378		92.2364	1.58469		87.8782	91.1733	86.2015	83.8259	88.1286		87.4415	1.20829		77.1694	83.5762	82.3974	83.0575	84.9323	81.2706		82.0673	1.09846		81.2424	85.7364	72.6017	75.989	85.5542	85.5451	86.2567	64.4613		79.6734	2.82405			1073.64		31005	17562	15798		24047	22084	20828
1078.65		91.4779	95.5681	90.2524		92.4328	1.60708		86.3836	91.4788	85.4193	83.8888	88.2152		87.0771	1.30509		78.0232	83.3455	82.6425	83.555	85.0327	81.142		82.2901	0.998075		80.8936	85.0774	71.9438	76.0005	85.9285	86.2188	86.3825	64.2987		79.593	2.88853			1078.65		31172	17596	15903		23638	22158	20639
1083.65		90.3422	94.8729	89.6029		91.606	1.64733		87.1547	91.1733	85.7048	83.8926	88.6557		87.3162	1.2453		77.6182	83.1856	81.6707	82.6889	84.7412	81.6104		81.9192	0.980064		81.1	85.4004	71.5304	75.7331	85.5079	85.047	86.2432	63.9528		79.3144	2.89351			1083.65		30785	17468	15747		23849	22084	20708
1088.66		90.5359	94.6502	89.8365		91.6742	1.50165		87.7942	90.8926	85.5765	83.6296	88.3191		87.2424	1.23723		77.1694	83.7955	81.8143	82.6322	84.8708	81.485		81.9612	1.08765		81.2602	84.9593	71.1722	76.8232	85.345	85.0561	86.1646	64.1547		79.3669	2.84795			1088.66		30851	17427	15929		24024	22016	20677
1093.66		90.8117	94.8566	91.1012		92.2565	1.30273		87.3483	91.0206	85.5103	83.6487	87.7005		87.0457	1.22916		77.8065	82.7814	81.8397	82.4002	84.8157	81.7753		81.9031	0.936383		80.979	85.0827	71.4788	76.4164	86.1685	85.0253	86.0927	64.2052		79.4311	2.86468			1093.66		30945	17465	15793		23902	22047	20661
1098.67		91.3341	95.2477	90.7594		92.447	1.4101		87.4982	90.2816	84.9764	83.6906	88.3365		86.9566	1.17984		76.6331	82.9161	82.6235	82.1451	84.5112	81.8611		81.7817	1.09685		80.979	84.7361	72.5053	75.0748	84.7549	85.5378	85.9354	63.4425		79.1207	2.86697			1098.67		31123	17537	15929		23943	21868	20532
1103.67		91.425	95.5953	89.3693		92.1299	1.83149		88.1158	90.4343	85.7338	83.5953	88.4701		87.2699	1.18388		77.465	82.5096	81.358	82.2301	84.44	81.1222		81.5208	0.942295		80.7868	84.7571	72.0781	75.468	85.8404	85.3567	86.0051	64.0014		79.2867	2.85762			1103.67		31154	17601	15823		24112	21905	20715
1108.68		91.5864	94.1994	90.0701		91.952	1.20598		86.866	91.0495	84.8771	83.5306	87.5495		86.7745	1.28467		76.9834	82.8179	82.1481	82.3874	84.6311	81.1552		81.6872	1.04971		81.3101	85.4319	71.868	76.6587	84.7021	85.0814	85.9804	63.5434		79.322	2.86404			1108.68		31209	17344	15621		23770	22054	20508
1113.69		90.8323	95.378	90.241		92.1504	1.6228		87.754	89.8439	86.1187	83.3438	87.2055		86.8532	1.06619		76.9462	83.3135	82.1291	83.4416	84.4983	80.1953		81.754	1.1328		81.0822	84.8044	70.7692	75.5594	84.8694	84.6739	85.9826	63.5004		78.9052	2.90682			1113.69		30952	17561	15827		24013	21762	20808
1118.69		90.5623	95.0467	90.1043		91.9044	1.5767		87.1474	90.4178	85.8248	83.4867	87.9232		86.96	1.14611		76.8542	82.8773	81.7108	82.5755	84.372	81.5147		81.6508	1.04552		80.3204	85.0564	71.4133	76.0096	84.7153	84.8514	85.8613	63.7659		78.9992	2.83783			1118.69		30860	17500	15826		23847	21901	20737
1123.71		91.2901	94.6882	89.5004		91.8262	1.52142		86.7052	90.9256	85.3241	83.2142	87.4084		86.7155	1.27279		77.0228	83.2976	81.7848	82.2714	84.3363	80.2349		81.4913	1.05827		81.0075	85.9989	71.3927	75.9319	85.9923	85.1484	85.7849	63.8163		79.3841	2.93499			1123.71		31108	17434	15856		23726	22024	20616
1128.71		91.0964	94.6013	89.8536		91.8504	1.42147		86.9683	90.2857	85.2578	83.2161	87.7425		86.6941	1.18813		76.7053	83.0029	80.8425	81.4053	84.4886	80.479		81.1539	1.07926		81.0324	85.6813	70.6762	74.9629	83.7796	85.4581	85.9085	63.5135		78.8765	2.94698			1128.71		31042	17418	15857		23798	21869	20600
1133.71		90.2043	95.0033	89.8536		91.687	1.6612		86.3872	91.0164	84.4715	83.1285	87.4332		86.4874	1.35578		77.1541	82.8842	81.8566	82.4544	84.1873	80.3107		81.4746	1.00785		80.566	85.5343	71.1619	75.6302	83.9469	85.0941	85.8141	63.2667		78.8768	2.90749			1133.71		30738	17492	15842		23639	22046	20410
1138.72		90.9291	94.6013	89.3978		91.6428	1.54393		86.4859	90.4219	86.2677	83.1914	87.1634		86.7061	1.15349		77.4934	82.9778	81.5629	82.0549	84.3623	79.9875		81.4065	0.982786		80.9576	85.5395	70.6038	76.1856	84.7021	84.7608	85.7265	63.349		78.9781	2.93048			1138.72		30985	17418	15728		23666	21902	20844
1143.72		90.9702	94.7154	89.8023		91.8293	1.48191		86.9171	91.838	83.9417	83.0504	87.8712		86.7237	1.56114		76.782	82.5439	81.2862	82.1348	84.3234	80.5383		81.2681	1.03878		80.9256	83.5574	70.2594	74.9766	84.4159	84.1197	85.4951	63.3265		78.3845	2.85801			1143.72		30999	17439	15769		23784	22245	20282
1148.73		90.8763	95.2042	89.2497		91.7767	1.7769		86.4822	90.7316	83.354	82.9894	87.7054		86.2525	1.43657		75.8428	81.9934	81.1784	81.761	84.2133	80.1887		80.8629	1.14112		80.9042	84.6731	71.6992	75.3971	85.4573	84.663	85.4569	63.1471		78.9247	2.89341			1148.73		30967	17529	15991		23665	21977	20140
1153.74		91.5014	94.862	89.6599		92.0078	1.52293		86.0766	90.8307	83.5651	83.0122	87.2228		86.1415	1.40698		76.5937	82.5484	81.6115	81.9389	84.3007	80.3899		81.2305	1.06484		80.5411	84.6863	71.4374	74.8852	84.7748	84.6757	85.5288	62.9751		78.688	2.90639			1153.74		31180	17466	15931		23554	22001	20191
1158.74		91.4661	94.4547	89.8137		91.9115	1.35812		86.3105	90.8389	83.1968	83.0561	87.4753		86.1755	1.45015		76.8017	82.7334	81.451	82.5575	84.1452	80.3305		81.3365	1.04755		81.0502	84.492	71.7543	75.1891	84.6977	84.6884	85.5782	62.618		78.7585	2.91971			1158.74		31168	17391	15687		23618	22003	20102
1163.74		90.7765	95.1336	90.2353		92.0485	1.55046		87.0962	89.7201	83.5568	82.7531	86.9852		86.0223	1.27515		76.6419	81.9614	81.3728	81.3202	83.857	80.6043		80.9596	0.974138		80.4913	84.7125	70.0527	75.0954	84.0372	83.7375	85.4322	62.8928		78.3064	2.91223			1163.74		30933	17516	15810		23833	21732	20189
1168.75		90.8557	94.395	89.5345		91.5951	1.45096		85.3603	90.0669	84.4094	82.635	87.5916		86.0126	1.29102		76.5193	82.8385	80.6777	81.8821	83.993	80.1293		81.0067	1.06544		80.7618	84.9593	70.3214	74.6932	84.0614	84.4457	85.3468	62.4647		78.3818	2.98328			1168.75		30960	17380	15840		23358	21816	20395
1173.75		90.1456	94.8457	89.3181		91.4365	1.7213		85.66	90.1825	85.1295	82.7283	87.3466		86.2094	1.23823		76.5784	83.1103	81.4467	81.7352	84.0319	79.6939		81.0994	1.08908		80.2456	84.6731	70.7933	74.4943	84.7549	83.9096	85.2996	62.2684		78.3049	2.97122			1173.75		30718	17463	15816		23440	21844	20569
1178.74		90.6767	94.8077	89.4377		91.6407	1.6234		86.9902	89.6829	84.219	82.6978	87.2203		86.1621	1.22431		75.6195	81.2808	80.9355	81.5574	83.8343	79.3772		80.4341	1.12677		80.4735	83.9879	69.8874	73.7676	84.9113	84.2736	85.2749	62.7638		78.1675	2.98109			1178.74		30899	17456	15710		23804	21723	20349
1183.74		90.2835	94.3895	90.1327		91.6019	1.39449		85.5248	90.1536	84.8895	82.7226	86.9358		86.0452	1.23122		76.1668	82.8225	81.3221	81.9569	83.7566	79.6213		80.941	1.11324		80.3062	83.9407	70.6658	74.6223	84.2265	84.5326	85.1625	62.6685		78.2656	2.90642			1183.74		30765	17379	15772		23403	21837	20511
1188.75		90.8733	94.7263	89.3465		91.6487	1.60065		85.565	90.5086	84.5667	82.5549	87.5767		86.1544	1.35659		76.6331	82.0551	81.0939	80.7918	83.6205	79.1892		80.5639	0.987259		80.0463	83.7963	70.6865	73.6053	85.5498	84.5544	85.221	62.6891		78.2686	2.9777			1188.75		30966	17441	15772		23414	21923	20433
1193.75		90.3334	94.6122	90.0473		91.6643	1.47627		85.7842	89.1338	84.0742	82.5759	86.9061		85.6948	1.13261		75.7224	80.8652	80.0714	80.9362	83.708	79.0803		80.0639	1.07235		80.8473	84.3108	69.7875	72.9425	85.5872	84.2809	84.9514	62.6984		78.1757	3.04779			1193.75		30782	17420	15692		23474	21590	20314
1198.76		90.6679	94.1505	89.4377		91.4187	1.41133		85.8719	89.9348	84.575	82.3701	86.5942		85.8692	1.24446		76.088	82.1327	80.0355	81.3409	83.6885	79.2519		80.4229	1.07616		79.8256	84.4447	70.2801	73.2145	83.6144	84.587	85.1401	62.575		77.9602	2.96158			1198.76		30896	17335	15763		23498	21784	20435
[truncated: 16 more columns]
