# Supplementary material for: Structural and functional properties of the transporter SLC26A6 reveal mechanism of coupled anion exchange
Source: eLife. 2023 Jun 23;12:RP87178. doi: 10.7554/eLife.87178 (PMC10328499; doi:10.7554/eLife.87178)
Supplement: Figure 5—source data 1. [file elife-87178-fig5-data1.xlsx]

## Sheet: Figure 5b
Figure 5 b
R404V Symmetrical Chloride Trace
	Voltage
Time (ms)	-100	-80	-60	-40	-20	0	20	40	60	80	100
109.2	-99.8245	-80.1424	-66.7442	-40.534	-22.7331	11.9701	35.8353	59.5842	82.141	100.656	95.1474
109.25	-616.109	-588.323	-466.58	-303.686	-150.739	12.354	168.38	321.941	471.14	612.692	614.763
109.3	-2387.35	-2305.22	-1801.33	-1183.03	-592.057	14.1066	610.822	1195.51	1772.44	2326.38	2379.35
109.35	-5797.13	-5516.29	-4281.13	-2821.22	-1414.88	14.2022	1430.83	2818.85	4185.32	5515.48	5754.56
109.4	-9174.06	-8486.73	-6547.53	-4322.44	-2166.59	12.296	2175.08	4299.17	6379.55	8444.72	9063.89
109.45	-10170	-9030.6	-6911.32	-4571.86	-2286.55	10.7345	2286.17	4536.1	6725.49	8947.11	10000.6
109.5	-8867.52	-7514.97	-5689.47	-3775.23	-1881.52	10.5489	1879.38	3747.24	5554.78	7421.77	8709.41
109.55	-6988.56	-5716.72	-4284.26	-2849.48	-1414.71	10.8902	1425.43	2845.2	4223.98	5661.71	6918.27
109.6	-5481.04	-4416.74	-3296.06	-2189.14	-1082.1	10.0079	1116.68	2211.82	3293.54	4429.25	5521.67
109.65	-4386.41	-3521.7	-2632.69	-1739.62	-855.72	6.59823	910.351	1784.86	2666.03	3596.55	4511.98
109.7	-3563.78	-2856.47	-2142.77	-1405.72	-691.326	1.95738	750.452	1466.73	2196.63	2967.01	3733.14
109.75	-2925.62	-2340.29	-1758.62	-1146.88	-569.365	-0.267643	617.819	1212.43	1820.55	2459.34	3105.08
109.8	-2420.11	-1931.52	-1450.61	-948.529	-475.751	0.389131	508.598	1001.82	1510.36	2044.45	2591.53
109.85	-2012.67	-1603.21	-1203.29	-797.98	-398.402	1.1291	422.283	826.547	1255.46	1708.64	2174.06
109.9	-1679.71	-1336.25	-1004.64	-676.668	-331.543	0.918663	356.235	683.897	1049.7	1437.72	1837.8
109.95	-1408.93	-1119.95	-842.921	-571.529	-272.795	0.501951	304.789	572.07	886.918	1218.64	1567.88
110	-1191.85	-948.362	-709.195	-480.566	-221.995	0.328812	262.829	487.545	759.572	1041.69	1350.95
110.05	-1017.5	-813.34	-600.129	-405.327	-183.573	1.71299	227.654	424.074	659.434	898.254	1175.57
110.1	-875.286	-704.153	-514.215	-345.379	-161.036	6.33649	196.494	373.731	579.548	781.94	1031.3
110.15	-758.504	-612.85	-447.244	-298.628	-149.931	11.9218	167.07	329.264	513.32	687.331	910.529
110.2	-663.229	-536.042	-392.689	-261.634	-140.258	16.0305	140.989	286.975	455.25	608.174	810.815
110.25	-585.153	-472.511	-345.616	-231.351	-125.614	20.366	121.053	248.57	403.947	541.67	731.477
110.3	-520.091	-422.052	-305.601	-206.221	-108.135	23.5067	106.136	218.61	362.329	489.816	668.683
110.35	-465.802	-384.431	-274.099	-184.359	-93.4168	19.6157	93.8401	198.624	331.585	451.499	616.59
110.4	-420.635	-356.513	-250.035	-164.484	-83.9783	8.56604	84.5717	184.857	308.6	419.311	571.445
110.45	-383.616	-331.79	-230.647	-147.462	-78.0696	-2.09778	79.4156	172.315	289.483	387.955	533.399
110.5	-353.797	-305.912	-214.422	-133.237	-72.4786	-5.60622	79.524	160.502	270.802	360.184	503.865
110.55	-329.196	-280.201	-200.422	-121.709	-65.9676	-2.03273	83.856	150.341	251.399	340.577	481.445
110.6	-308.292	-258.511	-185.827	-114.872	-58.698	2.28766	85.9271	141.004	234.746	328.046	463.995
110.65	-291.044	-243.057	-169.31	-111.921	-52.1917	1.81828	79.0552	133.917	223.325	317.571	450.388
110.7	-277.029	-232.452	-155.224	-108.229	-49.261	-1.53581	64.936	131.89	215.796	307.147	437.625
110.75	-266.135	-223.433	-147.66	-101.971	-49.2355	-2.35982	52.3562	133.169	210.051	298.318	423.558
110.8	-260.289	-214.961	-144.763	-95.0036	-48.5722	-0.623889	47.2464	134.797	204.251	291.831	411.142
110.85	-259.613	-208.966	-143.253	-88.5779	-46.9472	-0.635445	47.8698	136.695	197.789	286.29	402.365
110.9	-258.012	-205.638	-141.927	-83.2158	-44.3304	-1.63999	49.9331	135.391	192.4	279.758	395.196
110.95	-248.993	-202.401	-140.336	-79.6299	-39.185	1.1047	51.0376	124.833	188.857	271.706	389.163
111	-235.325	-198.723	-138.218	-77.2508	-34.4051	7.51323	51.3107	108.263	184.462	264.609	385.487
111.05	-225.374	-196.958	-134.595	-74.6396	-34.459	12.5518	51.1772	96.2523	179.603	261.763	384.364
111.1	-221.82	-197.397	-128.4	-72.6179	-37.7388	12.4544	48.9615	92.758	178.977	264.395	385.515
111.15	-220.554	-196.653	-121.453	-73.3493	-40.2112	7.86772	45.2991	93.892	181.012	268.014	386.996
111.2	-218.88	-191.255	-116.95	-76.8579	-41.037	2.53645	44.1682	95.1526	178.272	265.609	384.337
111.25	-216.395	-182.681	-116.773	-80.0766	-40.4253	-0.499138	46.0747	94.0079	169.555	259.028	375.637
111.3	-212.833	-176.227	-120.505	-78.7853	-36.9567	-0.866147	47.6053	90.6937	161.319	256.644	365.5
111.35	-209.605	-173.067	-125.05	-74.0816	-30.3573	0.102862	47.9207	86.5441	157.192	260.436	360.165
111.4	-206.675	-170.408	-126.574	-72.3233	-24.246	1.81332	48.5397	82.7282	155.197	266.93	359.652
111.45	-202.039	-168.105	-120.71	-74.3162	-23.4366	4.67039	49.2375	82.1266	154.536	270.838	359.959
111.5	-197.331	-168.046	-106.953	-74.8074	-27.8591	7.42646	47.3361	85.8875	155.97	267.059	360.064
111.55	-195.569	-169.569	-94.4206	-73.2929	-32.5962	7.90414	41.2888	90.2828	157.319	257.755	360.686
111.6	-195.235	-170.159	-91.6395	-75.3075	-34.827	7.00223	35.4053	92.4283	155.892	251.147	362.575
111.65	-194.694	-167.895	-95.2245	-82.1679	-35.5889	7.82121	35.1736	92.2976	152.967	250.497	367.294
111.7	-195.365	-162.565	-98.7716	-84.6167	-36.0391	9.53188	39.0132	90.2857	151.31	250.745	372.529
111.75	-196.871	-157.244	-102.127	-75.6113	-36.6716	7.99671	41.8022	87.6775	152.132	247.563	370.906
111.8	-196.669	-156.451	-107.239	-63.1013	-38.8102	2.94557	42.1009	85.7661	154.788	243.697	361.011
111.85	-194.535	-159.328	-114.008	-58.0836	-42.904	-0.622672	41.045	85.2692	157.305	242.786	351.426
111.9	-192.038	-161.306	-119.816	-60.2458	-46.0764	0.735969	39.3738	86.7764	157.964	244.495	348.458
111.95	-190.995	-160.858	-121.271	-63.1777	-41.9207	4.22575	38.3793	88.902	156.446	245.981	349.412
112	-192.252	-158.415	-117.406	-62.9488	-27.4959	4.90718	39.7432	89.2327	154.401	246.242	349.513
112.05	-195.208	-154.977	-111.298	-60.7922	-10.1366	1.31491	42.8243	87.5603	153.596	246.813	347.023
112.1	-198.733	-152.366	-107.661	-61.7929	-1.08994	-5.19825	46.4993	85.2783	152.941	247.212	344.04
112.15	-201.238	-151.526	-108.768	-66.7929	-3.40523	-11.9933	49.4915	83.61	151.16	246.279	343.811
112.2	-200.902	-153.821	-111.81	-69.2683	-12.252	-14.4841	48.9767	83.9729	149.421	246.157	345.745
112.25	-197.355	-159.207	-112.139	-65.8116	-22.0671	-9.67036	44.9852	86.5394	148.713	248.262	347.234
112.3	-193.242	-162.991	-109.146	-61.6774	-29.1215	-0.300843	42.0856	88.687	147.755	250.095	348.685
112.35	-191.638	-160.646	-107.084	-61.1234	-33.0793	7.16419	41.6381	87.9629	145.643	248.874	350.601
112.4	-191.856	-153.293	-108.874	-63.0415	-35.3394	8.96409	39.5057	85.7287	144.108	245.98	351.32
112.45	-192.024	-146.601	-111.468	-64.4906	-36.0749	6.8911	34.372	84.4448	144.828	244.293	349.97
112.5	-192.385	-145.033	-110.012	-63.3215	-34.7683	4.16735	32.7066	84.3816	146.909	243.949	346.764
112.55	-193.374	-147.489	-104.871	-61.5009	-31.8914	2.85222	40.6267	84.7101	149.228	244.763	342.43
112.6	-194.15	-150.184	-99.9483	-64.1399	-29.1538	3.41125	53.8167	84.5507	150.914	247.565	338.714
112.65	-193.241	-151.494	-96.7801	-71.4785	-28.4177	3.99205	61.3907	82.9804	150.851	249.623	336.843
112.7	-190.25	-152.688	-95.22	-77.4083	-29.4946	3.51525	59.9808	79.6579	149.542	247.209	337.353
112.75	-187.401	-153.861	-95.5379	-76.5334	-30.029	4.45351	54.7157	76.1825	147.585	242.86	339.596
112.8	-186.393	-152.838	-97.4621	-70.2498	-29.4906	8.08244	48.7228	76.8561	144.899	241.451	341.261
112.85	-187.022	-150.305	-100.252	-64.7275	-31.2458	10.9989	42.0749	84.5615	142.584	241.911	340.66
112.9	-189.128	-150.204	-102.045	-62.5078	-35.779	11.3081	36.8029	94.6759	140.892	240.344	338.433
112.95	-190.831	-152.844	-100.345	-61.5868	-38.1712	9.75721	35.9936	97.1581	137.981	237.166	336.975
113	-189.511	-154.539	-96.4694	-60.834	-36.7844	7.0674	39.9227	90.1449	133.555	235.026	338.335
113.05	-185.434	-154.17	-95.6482	-60.283	-35.273	6.03494	44.8122	83.1406	130.555	234.014	342.558
113.1	-179.896	-154.734	-100.56	-59.5325	-34.3736	7.97277	46.1109	82.3084	132.957	233.584	347.024
113.15	-174.436	-157.739	-107.523	-59.6161	-32.6954	9.09848	44.1063	83.6868	140.115	234.695	347.422
113.2	-172.584	-159.366	-110.181	-61.3794	-31.1857	6.43001	42.9423	82.211	145.356	237.109	343.749
113.25	-175.568	-156.42	-107.784	-63.2629	-30.4123	1.29853	44.1793	78.8804	144.774	238.356	340.264
113.3	-179.276	-151.349	-104.179	-65.1411	-29.4485	-2.05251	45.896	79.0432	142.527	237.529	338.094
113.35	-180.028	-148.851	-100.903	-67.8601	-28.6285	-1.88105	46.585	84.5304	142.448	239.689	335.723
113.4	-178.109	-149.422	-97.6205	-70.4593	-28.8017	-0.675197	46.1258	90.01	143.274	249.701	333.677
113.45	-175.498	-151.077	-95.175	-71.0548	-28.3489	1.14329	45.5887	88.984	143.009	261.233	331.715
113.5	-175.084	-153.781	-95.055	-68.7133	-26.0575	4.76009	46.8419	81.9169	140.909	263.272	326.851
113.55	-178.714	-156.12	-97.5926	-63.9196	-25.642	7.14871	48.242	76.8497	138.217	256.734	318.632
113.6	-184.36	-156.128	-101.434	-59.5792	-30.2703	5.36383	45.8929	78.4712	138.879	250.308	313.053
113.65	-188.092	-155.317	-105.307	-58.5819	-34.8913	2.21654	40.6897	81.6272	143.986	247.304	316.438
113.7	-188.164	-155.118	-108.325	-60.2375	-33.581	0.815468	37.5618	80.7077	148.971	245.797	325.434
113.75	-185.571	-154.81	-109.416	-61.6865	-28.5849	-0.643889	38.6605	77.3148	150.959	243.633	330.514
113.8	-181.466	-153.61	-107.837	-61.0269	-25.3787	-3.70071	40.7345	74.7797	151.137	241.126	330.892
113.85	-176.718	-151.338	-104.684	-58.1099	-25.4858	-6.35533	40.1456	73.2619	150.403	241.269	332.98
113.9	-172.896	-149.843	-102.317	-55.5281	-26.3486	-7.22017	37.8354	72.7441	149.192	244.5	336.473
113.95	-172.764	-150.59	-102.101	-57.3202	-26.8659	-5.38312	35.4445	74.6399	148.877	245.671	337.317
114	-177.938	-151.962	-103.349	-62.9442	-28.1524	-0.0999858	33.4327	79.6245	149.928	241.687	335.495
114.05	-184.829	-152.798	-104.417	-68.0607	-30.8575	5.93995	33.8214	85.3463	151.041	236.103	332.655
114.1	-188.141	-154.051	-104.554	-70.1728	-34.0463	9.73789	36.6025	87.4791	150.386	233.255	330.51
114.15	-187.826	-156.314	-103.112	-69.3204	-34.7156	11.2169	38.8392	85.4023	147.926	234.02	330.807
114.2	-187.244	-159.368	-100.287	-67.1469	-29.7287	10.5099	39.2215	83.7874	145.386	236.102	332.979
114.25	-186.746	-161.785	-98.7274	-67.065	-21.9802	8.59948	38.1373	84.5947	144.026	236.143	334.864
114.3	-184.018	-161.417	-100.188	-69.8793	-19.082	7.89427	36.5333	85.1687	144.601	234.66	335.525
114.35	-179.66	-157.677	-102.143	-71.699	-22.3899	8.23851	35.0765	84.4459	145.96	235.456	334.53
114.4	-176.62	-153.564	-102.539	-69.8601	-26.7726	8.25839	34.4208	83.5584	145.771	239.129	332.112
114.45	-175.695	-152.678	-104.633	-66.4114	-30.2209	8.09155	35.2794	83.0971	145.951	243.289	330.668
114.5	-174.576	-154.785	-110.772	-64.4418	-32.8231	7.17369	37.7479	83.2707	149.672	247.3	332.967
114.55	-173.777	-157.048	-115.901	-65.7371	-33.1605	4.33617	41.3226	84.9761	154.734	250.903	337.003
114.6	-177.241	-157.274	-113.89	-69.2182	-31.4288	1.34516	43.7965	88.3785	156.7	252.176	337.032
114.65	-182.816	-154.583	-107.543	-70.6707	-29.3234	1.40369	42.9393	90.5972	155.1	250.046	332.106
114.7	-184.14	-150.918	-104.533	-67.1694	-28.4657	3.64149	39.4242	87.7787	152.647	246.311	327.985
114.75	-181.507	-148.084	-105.322	-61.6323	-30.23	4.51083	36.9046	80.5703	150.067	242.728	327.951
114.8	-179.257	-144.851	-105.911	-58.853	-33.2611	4.06895	37.6853	73.6817	146.39	238.621	329.411
114.85	-179.375	-140.932	-105.833	-59.6467	-34.3036	3.93296	40.1191	72.1216	143.295	234.51	330.928
114.9	-181.947	-138.548	-106.512	-61.4492	-32.595	2.70307	42.4148	76.6113	142.316	232.898	334.166
114.95	-182.809	-138.834	-107.558	-62.4079	-31.8101	-0.283341	43.6587	81.9669	143.779	233.897	337.935
115	-178.558	-141.528	-107.943	-63.618	-34.4618	-2.67526	42.3348	83.1016	147.545	235.209	339.28
115.05	-173.519	-144.673	-107.175	-66.2005	-38.2555	-2.96794	38.7218	81.6007	151.795	236.119	339
115.1	-173.072	-143.808	-105.504	-67.2463	-40.7148	-1.86266	35.7473	81.3907	154.553	237.361	338.664
115.15	-176.752	-138.217	-102.743	-63.2575	-41.262	-1.02625	36.2721	80.8176	154.578	238.524	336.963
115.2	-179.903	-134.138	-98.0052	-56.773	-39.0125	-1.96189	40.2821	77.2701	151.618	237.548	333.249
115.25	-178.817	-134.284	-93.9346	-52.7247	-35.3851	-3.55948	42.5754	74.8197	148.646	235.431	329.466
115.3	-175.627	-135.959	-94.0606	-51.6061	-34.8206	-3.26081	39.6962	77.1759	148.761	235.383	327.706
115.35	-174.496	-139.773	-98.0408	-52.3617	-38.8496	-0.888623	36.7474	81.1023	150.979	237.48	327.109
115.4	-176.897	-146.571	-103.456	-54.2539	-43.3247	1.56306	38.0264	82.9256	151.534	239.863	325.857
115.45	-181.779	-152.364	-106.322	-56.077	-43.6088	2.51249	39.3342	81.6368	147.903	240.84	324.76
115.5	-185.827	-153.761	-102.002	-57.8396	-38.7024	0.470157	36.8141	78.4537	141.351	240.001	325.362
115.55	-186.903	-152.603	-91.9155	-60.1869	-32.0362	-4.23122	33.0775	77.0029	136.499	237.71	328.383
115.6	-187.347	-152.669	-84.1108	-61.9636	-27.7431	-7.67869	32.4831	77.9946	136.179	233.962	332.688
115.65	-189.439	-154.05	-84.3738	-61.1867	-26.5466	-6.89706	35.8787	77.8584	139.172	232.068	335.022
115.7	-189.587	-155.267	-89.4836	-59.587	-26.9641	-3.77053	39.1051	75.8173	142.572	235.296	334.041
115.75	-185.619	-156.433	-93.2105	-60.3999	-27.5427	-1.36507	38.9933	75.2479	143.897	239.216	332.319
115.8	-183.161	-156.458	-95.1125	-61.3185	-28.6049	-0.0800094	37.6039	76.5995	142.623	239.483	332.649
115.85	-186.205	-154.244	-97.4442	-59.7527	-30.734	0.685216	36.499	77.3825	140.756	238.611	334.664
115.9	-190.578	-151.619	-101.017	-58.6711	-31.33	1.89142	35.5461	76.8377	141.142	238.648	335.123
115.95	-189.806	-148.07	-104.63	-58.3158	-29.6698	3.80485	36.0614	76.2427	143.553	238.671	332.913
116	-184.065	-142.877	-106.122	-56.593	-27.4977	3.38954	37.5197	76.6973	144.772	238.825	330.389
116.05	-179.517	-139.996	-105.251	-54.6389	-25.2762	-1.07503	36.8483	76.9339	144.236	239.79	328.414
116.1	-177.711	-141.865	-104	-53.5549	-24.3648	-5.7459	33.548	75.4056	144.617	241.087	325.825
116.15	-177.386	-144.599	-104.217	-53.2089	-25.38	-7.60511	31.4047	73.7015	146.904	241.931	323.35
116.2	-179.603	-143.004	-106.259	-52.9164	-26.1402	-7.55281	32.6586	74.6921	148.661	241.341	323.063
116.25	-182.246	-137.113	-108.779	-51.8826	-25.1789	-5.77152	35.0089	78.2215	147.388	239.604	325.084
116.3	-180.821	-133.807	-109.357	-51.8422	-22.5089	-1.95288	36.225	80.9573	143.919	237.935	327.188
116.35	-176.14	-136.583	-108.264	-55.2062	-19.903	1.77906	35.9634	80.7127	141.145	235.318	326.828
116.4	-174.198	-141.652	-106.952	-61.2599	-19.7908	4.81028	34.7611	78.5747	140.812	231.495	323.45
116.45	-177.063	-144.477	-103.147	-65.1572	-21.635	7.96629	34.072	76.9093	142.067	229.563	320.287
116.5	-180.146	-144.147	-97.857	-62.8326	-25.1788	9.82032	34.2602	76.8473	143.064	231.161	320.474
116.55	-178.368	-144.964	-97.1556	-58.5212	-29.7765	8.74341	35.7855	77.6933	143.027	234.379	322.733
116.6	-173.519	-148.524	-101.543	-59.1915	-30.1585	5.3411	38.2612	78.0661	142.369	237.429	323.77
116.65	-172.71	-148.117	-106.458	-63.5647	-24.5285	1.40696	38.2346	77.9768	141.313	240.005	323.484
116.7	-176.81	-140.301	-109.368	-64.033	-19.4398	-1.39054	34.832	78.0962	139.362	242.152	323.511
116.75	-180.103	-131.703	-109.233	-57.6562	-18.1068	-2.36851	31.9306	77.6449	137.421	243.641	322.314
116.8	-180.896	-129.066	-107.039	-49.5926	-17.4886	-3.5745	32.3258	76.537	137.43	243.8	317.61
116.85	-180.821	-132.944	-104.728	-45.1667	-17.33	-7.06349	35.6538	76.8652	139.968	242.322	312.168
116.9	-181.067	-138.325	-101.125	-44.5358	-19.3792	-9.67456	40.358	78.5898	142.148	239.612	311.258
116.95	-182.871	-139.949	-96.5846	-47.0346	-22.4172	-7.39664	45.0777	78.7491	140.232	237.904	314.258
117	-184.72	-137.223	-96.5144	-53.0514	-24.434	-2.37529	48.2481	76.4404	135.652	238.357	316.736
117.05	-183.96	-133.235	-101.085	-61.1484	-27.1585	1.09985	47.1572	75.434	134.145	238.366	317.383
117.1	-181.954	-131.666	-104.628	-66.2633	-32.7012	2.85453	43.0591	78.5418	137.515	237.35	315.52
117.15	-181.601	-133.714	-104.81	-64.4537	-36.5374	3.05209	40.1504	82.9386	142.185	236.78	312.158
117.2	-183.23	-137.774	-103.02	-59.353	-34.8002	2.41902	37.3111	86.438	145.719	235.886	311.898
117.25	-184.562	-141.661	-100.616	-57.5137	-31.2713	6.10752	32.9931	88.976	148.192	235.154	315.333
117.3	-183.474	-143.45	-99.4534	-59.1377	-30.6683	12.8999	30.6831	90.1239	148.957	236.32	319.276
117.35	-181.023	-142.972	-100.089	-60.7501	-30.7078	13.1777	30.7613	90.8623	148.077	239.187	322.366
117.4	-179.569	-142.297	-100.977	-62.0801	-25.5978	7.95347	30.5479	90.1133	147.56	243.551	321.968
117.45	-179.713	-143.539	-102.28	-64.385	-15.9585	6.65429	28.4282	84.7849	148.199	247.638	317.452
117.5	-181.817	-147.093	-103.833	-65.5731	-9.68194	10.4245	26.4111	79.3724	149.703	248.838	314.47
117.55	-184.909	-150.596	-102.39	-63.89	-10.8505	12.6196	31.5998	79.5359	152.52	248.347	316.699
117.6	-184.975	-151.27	-97.8164	-60.8897	-15.8956	7.77379	43.0503	83.6633	157.169	247.705	321.96
117.65	-180.615	-149.175	-95.6212	-58.3368	-20.2325	-0.724673	46.9862	89.231	161.831	247.653	327.581
117.7	-175.896	-146.116	-97.6812	-56.0898	-22.4955	-4.16029	39.5861	91.2445	161.716	249.757	330.594
117.75	-174.322	-142.882	-100.28	-53.9249	-23.2515	-1.85416	30.8267	83.5472	155.985	253.524	330.118
117.8	-175.114	-139.703	-100.976	-52.628	-23.4947	-0.576868	27.6741	74.141	150.041	256.858	328.776
117.85	-176.649	-138.11	-98.4181	-52.1604	-25.3837	-1.64607	30.436	75.4989	147.059	257.854	326.371
117.9	-179.166	-138.716	-93.0149	-51.2674	-29.8574	-2.34846	35.8378	84.1803	145.619	255.752	322.621
117.95	-182.07	-139.912	-90.1918	-50.4333	-33.8758	-1.97625	39.8668	89.4236	144.096	254.138	322.045
118	-182.871	-140.821	-92.4969	-51.7793	-35.0146	-1.82528	40.8568	88.4944	143.242	256.26	325.359
118.05	-181.064	-141.943	-95.4411	-55.1673	-34.4995	-2.53551	39.0927	84.3886	145.998	257.407	327.824
118.1	-179.059	-142.652	-95.8872	-58.1576	-33.1857	-2.20511	36.802	81.494	152.459	252.256	327.283
118.15	-178.178	-142.219	-94.0899	-58.65	-30.966	0.668089	37.7428	81.3424	157.33	244.142	325.609
118.2	-177.76	-141.595	-91.2715	-56.3585	-29.7068	4.59106	40.7096	79.9249	155.837	237.658	326.118
118.25	-177.822	-141.994	-89.3692	-53.8359	-31.4425	6.73185	40.2712	75.714	151.018	233.389	329.506
118.3	-177.631	-142.05	-88.7162	-54.0046	-33.8568	6.67953	36.5459	72.3339	147.834	230.081	331.282
118.35	-174.317	-139.196	-88.1604	-56.9495	-31.3099	7.70282	34.3953	71.0145	146.928	227.323	328.334
118.4	-169.448	-134.305	-88.0006	-61.0732	-23.1108	11.1278	35.7171	70.7579	147.171	229.223	326.586
118.45	-168.891	-131.822	-90.948	-63.7872	-16.4611	13.1626	37.854	72.6655	147.334	237.316	329.443
118.5	-173.331	-135.065	-98.1165	-63.0631	-17.675	10.9253	37.3029	77.6822	145.818	244.025	330.62
118.55	-176.935	-142.522	-104.401	-60.8918	-23.9365	5.3436	34.4991	83.9403	142.605	246.541	327.431
118.6	-176.578	-148.75	-104.377	-60.0902	-28.1836	-1.29763	32.4485	87.8383	139.428	248.484	325.636
118.65	-175.235	-149.709	-101.739	-60.3956	-27.9222	-5.645	32.496	88.4457	139.349	248.096	328.842
118.7	-174.829	-146.585	-101.66	-61.4395	-24.6046	-5.24427	33.3983	88.4146	142.471	241.539	333.576
118.75	-173.27	-143.917	-102.057	-63.0985	-20.5449	-2.31226	32.5963	88.8658	145.289	232.811	335.106
118.8	-169.247	-145.236	-99.7899	-62.4613	-18.3196	0.311044	30.4542	87.7058	146.408	230.242	333.892
118.85	-164.291	-149.137	-96.8004	-57.965	-18.3565	3.09919	30.0454	84.0835	146.846	234.667	331.048
118.9	-163.277	-150.066	-96.0101	-53.4734	-20.0815	5.80583	31.6735	80.4289	147.275	239.638	326.47
118.95	-170.562	-145.289	-96.8079	-53.7027	-23.4241	6.0438	33.37	79.0246	147.626	241.886	322.083
119	-181.501	-139.073	-97.473	-58.3289	-27.2687	4.60342	34.6053	79.3413	146.479	241.383	319.28
119.05	-184.559	-137.351	-98.7222	-64.0732	-28.8182	3.63457	34.989	79.9386	143.468	239.511	319.352
119.1	-176.564	-140.281	-101.21	-68.4806	-26.2354	2.46209	34.2784	80.2842	140.792	240.034	322.582
119.15	-167.48	-143.591	-102.24	-69.7165	-22.0357	-0.425041	32.3821	80.4659	139.997	244.595	324.704
119.2	-165.743	-146.675	-99.6051	-67.9222	-20.3815	-4.81991	28.3845	80.1131	139.855	249.899	323.625
119.25	-169.154	-152.017	-95.2204	-65.3389	-21.3805	-8.75675	22.874	78.3734	139.302	252.084	324.116
119.3	-171.445	-156.454	-91.9113	-62.0802	-23.1979	-9.21177	20.1524	75.9603	139.828	249.978	328.775
119.35	-169.127	-153.032	-90.3722	-57.1399	-25.3987	-4.81259	22.497	75.2897	142.187	245.64	332.956
119.4	-163.683	-141.743	-90.967	-52.446	-27.4011	0.845736	25.8909	76.564	144.665	242.952	332.686
119.45	-160.434	-129.25	-95.9014	-50.9079	-27.4824	2.93355	26.5681	77.1598	146.253	243.88	330.577
119.5	-162.431	-121.806	-105.02	-53.3379	-25.7338	2.10963	25.7572	76.8972	147.261	246.187	330.064
119.55	-166.341	-121.728	-111.128	-58.2571	-24.4939	0.987832	25.9771	80.2067	148.056	246.818	330.269
119.6	-168.21	-126.579	-107.156	-62.6032	-25.3167	-1.40765	27.9012	87.9961	148.39	245.143	330.003
119.65	-169.538	-131.057	-97.0356	-66.155	-27.7967	-4.61946	30.5819	93.8328	147.547	242.551	329.271
119.7	-171.279	-131.836	-88.9533	-71.8449	-30.0557	-4.26116	33.0318	92.6468	145.09	240.365	327.227
119.75	-169.83	-130.829	-84.5025	-78.9332	-30.4049	0.736229	35.5062	84.8507	140.748	238.947	322.907
119.8	-165.278	-130.876	-82.4052	-81.2568	-29.0736	5.92357	37.6426	73.7766	136.331	236.919	318.083
119.85	-162.352	-132.15	-84.1856	-74.4832	-27.5956	7.55808	38.0537	65.7295	136.446	233.492	317.263
119.9	-163.007	-135.509	-90.3382	-62.6661	-26.5713	6.35805	37.8479	65.8506	141.173	230.774	322.169
119.95	-167.061	-139.704	-97.7053	-53.5402	-27.3787	5.14632	39.6595	72.6182	144.203	231.455	328.998
120	-172.878	-139.564	-102.556	-50.3448	-32.5549	5.84748	42.7333	80.1556	142.811	235.742	333.933
120.05	-176.401	-136.153	-103.146	-50.4826	-38.6995	8.42865	43.8823	84.0638	140.957	241.152	336.33
120.1	-176.165	-136.017	-100.326	-49.4952	-37.1363	10.8963	43.6802	83.459	140.914	245.262	335.808
120.15	-174.143	-139.437	-97.1209	-46.8221	-27.4859	11.0613	44.7545	78.9295	141.532	246.612	332.719
120.2	-172.137	-141.175	-95.996	-44.9026	-19.2381	7.9029	44.9388	72.5361	142.604	244.708	329.948
120.25	-171.76	-138.95	-95.7503	-46.4649	-17.7859	1.46342	40.1714	68.6996	145.403	241.642	329.658
120.3	-172.362	-134.405	-94.0021	-53.1697	-19.504	-5.88225	32.5132	69.4571	148.642	239.513	330.999
120.35	-171.758	-130.78	-91.5782	-60.5404	-19.35	-9.46252	28.6136	71.8199	148.689	236.984	332.924
120.4	-170.602	-130.803	-90.5299	-60.9626	-16.3306	-6.37084	30.328	72.6119	144.972	233.583	334.812
120.45	-170.559	-135.406	-91.5373	-55.1744	-13.0487	0.886175	32.4693	72.0074	140.953	232.458	334.818
120.5	-171.431	-142.989	-93.9209	-50.3821	-13.857	6.12288	30.654	71.6607	140.062	237.057	332.817
120.55	-171.722	-148.525	-94.6565	-50.8718	-20.5327	6.49446	26.3392	71.8241	142.203	244.533	330.6
120.6	-170.877	-148.191	-92.651	-55.3031	-27.806	5.17291	24.6775	71.5431	144.257	247.453	328.107
120.65	-170.538	-143.665	-91.7868	-58.8871	-29.7785	6.15362	29.9473	70.4045	145.184	244.245	325.29
120.7	-171.162	-137.914	-93.9254	-59.0978	-28.5223	8.90021	40.5164	69.7013	146.531	240.531	324.281
120.75	-169.841	-132.71	-96.5188	-56.9159	-27.0943	10.315	48.7605	70.5756	147.375	240.084	327.237
120.8	-164.16	-129.409	-97.0696	-52.8501	-24.3986	9.83869	49.5139	70.1758	144.851	242.872	334.015
120.85	-155.305	-127.649	-94.7379	-48.6601	-21.485	10.0274	45.8122	64.9953	138.72	246.683	340.5
120.9	-148.256	-125.95	-92.3399	-48.0851	-21.7794	11.948	43.2454	60.1879	132.596	248.671	340.997
120.95	-149.899	-125.015	-93.491	-51.393	-25.6918	11.8511	42.7361	64.9497	130.407	247.187	334.278
121	-161.531	-125.863	-95.8073	-55.0253	-29.8817	7.34992	42.3209	77.965	132.392	243.066	325.11
121.05	-174.312	-125.85	-95.6026	-56.4586	-30.9205	2.71104	40.6046	89.8677	135.902	239.577	320.023
121.1	-180.173	-122.605	-94.1708	-56.5325	-29.1862	1.13474	37.0241	95.3618	137.463	239.123	321.599
121.15	-180.748	-119.971	-93.2723	-56.667	-27.8392	0.518266	33.8791	93.9986	135.26	240.741	326.131
121.2	-179.494	-123.386	-91.6372	-56.2626	-29.1543	0.0776869	34.1609	88.3621	132.724	241.853	328.59
121.25	-176.181	-131.503	-88.3534	-54.7136	-32.2091	0.854438	35.6383	83.632	135.398	241.289	329.585
121.3	-170.85	-138.039	-84.0175	-53.1192	-33.6783	2.59199	35.7351	82.775	143.118	239.632	331.033
121.35	-165.02	-140.806	-78.7083	-52.095	-31.1701	5.59327	36.8814	84.3111	150.856	236.369	330.36
121.4	-160.931	-142.174	-74.9315	-51.7074	-26.2512	9.3399	39.6835	85.1642	154.999	230.017	326.945
121.45	-161.534	-142.276	-79.7812	-52.6933	-22.6668	11.3181	42.0067	84.9697	154.786	224.452	325.953
121.5	-167.688	-140.132	-94.5735	-54.891	-21.8361	10.0559	44.1614	85.4026	151.254	226.936	329.701
121.55	-175.505	-136.867	-107.889	-57.015	-22.6713	6.34527	46.6944	85.9773	147.804	235.884	333.6
121.6	-178.988	-133.581	-109.455	-57.0373	-24.9585	1.46567	47.9888	86.6631	147.023	243.087	334.031
121.65	-175.756	-131.777	-102.548	-54.3074	-28.7351	-2.79206	46.0605	88.0573	146.649	245.631	330.307
121.7	-170.916	-133.924	-95.2123	-54.7813	-32.0371	-4.85424	40.6321	87.5464	144.939	245.027	323.016
121.75	-170.716	-138.128	-90.2713	-64.8012	-32.3477	-5.23003	35.301	84.0827	144.787	242.275	317.331
121.8	-173.709	-138.363	-87.6559	-77.8457	-28.0608	-4.53608	33.9957	81.375	146.375	238.727	318.287
121.85	-174.976	-133.352	-86.4664	-81.492	-18.2604	-1.60049	35.3895	81.1009	146.93	236.553	322.744
121.9	-173.492	-127.865	-85.0871	-75.1213	-6.52286	3.62775	37.3136	81.5661	147.109	237.889	325.64
121.95	-170.935	-126.27	-84.25	-66.4046	-2.42219	8.56363	40.0306	82.6987	146.47	242.493	326.084
122	-169.727	-129.533	-86.4919	-59.9066	-10.5062	10.9215	42.0631	84.5104	143.608	247.014	326.204
122.05	-169.969	-136.05	-91.0196	-56.7923	-22.5952	11.259	41.414	85.5704	142.853	248.506	329.033
122.1	-170.031	-142.148	-94.1351	-55.3648	-29.2294	11.5844	38.9737	85.9264	147.381	246.689	333.944
122.15	-170.618	-142.855	-92.9209	-52.6302	-29.4635	13.7885	36.7233	86.559	152.982	243.94	336.094
122.2	-171.242	-136.766	-88.7829	-50.8699	-26.7717	17.8323	35.2893	86.9876	154.144	242.608	333.479
122.25	-169.055	-129.431	-86.6153	-54.1828	-23.3262	18.603	33.9749	86.4012	150.154	241.867	329.792
122.3	-164.744	-126.607	-88.2064	-59.1856	-20.5287	9.77495	33.0194	84.8164	145.261	239.056	327.882
122.35	-162.791	-128.831	-90.2409	-60.049	-20.4935	-4.90752	33.9839	82.978	143.65	234.043	325.116
122.4	-165.237	-133.807	-88.7789	-57.1426	-21.2514	-13.72	38.4209	82.4662	145.024	230.529	320.757
122.45	-167.827	-136.859	-84.5217	-54.3754	-19.7603	-12.8861	46.9937	83.6594	147.899	232.847	319.995
122.5	-166.516	-134.911	-82.8883	-54.2605	-19.4119	-8.24813	55.9231	84.4732	150.934	239.892	323.901
122.55	-164.331	-132.184	-86.3232	-56.0906	-23.4455	-3.7752	57.6492	84.2644	152.16	245.035	327.104
122.6	-165.498	-133.75	-90.7356	-56.3828	-26.9885	1.26696	50.5477	84.9017	152.132	244.85	327.412
122.65	-169.094	-136.798	-92.4098	-53.4109	-25.765	7.86165	42.7708	87.2915	153.669	241.868	326.312
122.7	-171.814	-136.624	-92.7539	-50.6441	-22.0818	14.9893	40.2976	91.4816	155.679	239.057	324.302
122.75	-172.648	-135.128	-93.9052	-51.5148	-20.0698	19.3069	40.8981	96.8189	154.662	238.371	321.556
122.8	-172.157	-135.766	-94.8909	-53.5241	-21.623	17.6553	42.1783	99.2118	152.109	240.909	319.047
122.85	-169.945	-137.518	-95.4347	-53.8652	-24.5021	11.196	44.0904	93.9143	151.551	245.222	318.899
122.9	-167.473	-138.681	-96.2538	-54.0855	-24.3674	5.00844	45.5104	83.2877	151.945	248.113	322.338
122.95	-167.844	-139.354	-96.5255	-54.9518	-21.5965	3.16345	46.2726	75.718	152.044	247.364	325.281
123	-170.531	-139.703	-96.8811	-55.284	-21.2163	5.39808	47.2502	74.0017	154.415	244.044	324.065
123.05	-172.221	-140.003	-98.6194	-55.8336	-23.7322	8.04433	46.2855	75.0574	158.79	241.235	322.398
123.1	-171.896	-141.355	-99.5566	-57.7107	-25.2036	8.05195	42.448	79.0217	159.688	240.927	323.563
123.15	-170.962	-143.309	-97.6201	-58.7545	-26.2265	6.31446	39.578	86.2854	155.761	242.962	325.051
123.2	-170.438	-143.699	-94.806	-57.1592	-29.6691	7.07074	39.2168	92.3194	151.595	244.928	325.143
123.25	-170.102	-141.087	-93.4976	-55.4036	-33.384	12.5061	39.0907	92.1948	148.969	245.618	324.755
123.3	-169.556	-136.069	-94.4722	-55.3818	-34.3576	17.6109	38.1935	85.5061	146.117	247.375	324.9
123.35	-168.358	-131.606	-97.3064	-55.8342	-31.7646	17.7756	37.8234	76.5013	143.858	249.65	325.636
123.4	-166.206	-130.38	-99.503	-56.3395	-24.8477	14.7555	38.8291	71.8782	144.207	247.213	326.526
123.45	-164.121	-132.128	-98.9227	-57.2264	-17.4364	11.4804	39.1075	74.8073	146.539	239.574	328.875
123.5	-163.412	-134.891	-96.1666	-58.0033	-16.0883	8.81929	37.0151	81.2362	148.946	233.45	335.251
123.55	-163.662	-135.668	-91.9131	-58.9158	-20.2397	6.44248	34.6416	86.0947	150.848	232.763	345.046
123.6	-163.161	-133.272	-87.5838	-61.0521	-24.5123	4.97197	34.1196	88.6077	151.517	234.748	353.273
123.65	-161.944	-131.306	-85.6675	-63.7709	-27.1995	5.57569	34.4439	89.2426	150.119	236.674	353.772
123.7	-161.593	-132.271	-86.7733	-63.9193	-29.0531	6.58166	34.1263	88.3034	147.86	238.12	345.552
123.75	-162.405	-133.132	-88.7339	-61.064	-28.4587	5.87322	34.3969	87.0415	146.4	238.959	335.992
123.8	-163.465	-131.99	-89.3034	-59.158	-23.0419	4.14212	36.3305	85.2966	146.605	239.574	332.199
123.85	-165.137	-130.42	-88.5867	-60.4945	-16.2481	3.09401	38.1408	82.5276	148.138	239.408	333.075
123.9	-167.637	-130.408	-87.9698	-63.1375	-14.4203	3.66794	38.8839	81.1599	148.155	237.846	335.356
123.95	-169.103	-133.124	-88.4714	-64.0009	-18.1915	5.02102	40.1807	82.0281	144.653	237.024	338.153
124	-168.089	-137.178	-91.0912	-61.2883	-22.7537	4.75792	43.37	82.3885	140.919	239.356	340.781
124.05	-165.908	-138.922	-96.2345	-57.4958	-24.9197	3.05751	47.7438	81.8933	142.336	243.396	342.776
124.1	-164.995	-137.608	-100.855	-56.5652	-25.4613	2.84665	51.3851	82.4213	149.416	246.092	343.261
124.15	-165.551	-135.741	-100.903	-57.1363	-25.8782	4.26542	53.4014	82.7176	156.419	245.45	340.62
124.2	-165.823	-135.532	-97.4487	-56.1517	-24.5771	5.85212	53.5422	81.4372	158.39	241.444	336.118
124.25	-166.471	-137.957	-94.5014	-55.794	-20.8055	8.62737	51.3232	81.3602	154.553	237.315	333.805
124.3	-168.796	-141.613	-93.4446	-59.1256	-18.7093	12.8629	47.4683	84.2055	147.24	236.302	334.245
124.35	-171.58	-143.438	-94.2623	-62.8523	-21.149	14.7332	43.196	86.8016	142.232	236.891	334.937
124.4	-173.558	-142.182	-97.5109	-61.8114	-24.8937	10.4489	39.1484	86.9457	142.722	236.41	334.292
124.45	-174.012	-139.952	-101.955	-58.0242	-25.483	2.72074	36.6123	86.0209	144.957	237.468	330.883
124.5	-172.707	-138.747	-104.262	-57.5064	-23.1206	-2.2344	37.5833	84.9202	145.823	242.199	323.987
124.55	-172.01	-137.107	-102.417	-60.4689	-20.9077	-1.89589	41.6669	83.3003	147.697	244.357	317.345
124.6	-174.086	-133.825	-97.3857	-62.4414	-19.4922	2.17692	43.6659	81.2035	151.995	239.56	316.133
124.65	-177.648	-131.867	-91.508	-61.3703	-17.9583	6.79739	40.4094	79.7261	154.944	234.365	321.481
124.7	-178.76	-132.969	-87.0622	-59.6133	-16.5246	9.06808	35.5745	80.3771	154.676	234.65	329.04
124.75	-175.294	-134.049	-85.9547	-59.5068	-14.7732	8.07068	33.3505	82.9181	153.389	237.582	334.574
124.8	-170.321	-133.266	-87.8188	-60.0654	-12.1008	5.44715	34.3101	84.992	151.005	239.559	337.37
124.85	-167.542	-132.646	-90.0912	-59.9829	-10.2038	3.55927	37.6047	84.6503	145.613	239.58	336.851
124.9	-167.032	-133.204	-91.1685	-59.1199	-11.1696	3.57044	40.6916	82.1633	138.62	237.978	332.782
124.95	-167.782	-134.288	-91.9411	-57.2428	-15.2998	5.39311	41.8734	78.4209	133.945	237.329	328.208
125	-170.662	-135.507	-93.5417	-55.2949	-20.0104	6.52146	42.0554	74.145	135.329	239.054	327.544
125.05	-174.989	-138.121	-95.1153	-55.2213	-22.5663	3.83643	40.846	70.3894	141.679	240.597	331.993
125.1	-176.008	-143.21	-95.63	-56.9615	-24.1289	-0.0634098	37.7613	69.39	146.552	240.905	338.322
125.15	-171.072	-146.902	-95.6688	-58.124	-26.4919	1.14737	35.3584	73.4913	146.568	242.925	341.838
125.2	-165.76	-145.816	-95.452	-57.2996	-27.6309	8.0893	34.9358	80.6871	145.23	246.729	340.289
125.25	-167.212	-143.117	-93.6759	-56.2481	-24.8954	14.742	34.6974	85.401	145.796	247.335	336.653
125.3	-173.019	-141.338	-91.1238	-57.1726	-20.0924	15.6388	34.3521	85.1046	146.535	243.372	335.284
125.35	-176.066	-140.548	-90.9898	-59.0671	-18.0349	11.2843	34.7403	83.109	145.66	239.3	336.237
125.4	-174.697	-140.379	-93.2503	-59.6183	-19.8779	7.11909	34.6656	83.7466	146.213	236.888	336.774
125.45	-171.574	-138.807	-94.9019	-56.9184	-20.3131	6.07055	34.3922	86.4718	151.923	234.671	336.109
125.5	-169.453	-136.568	-96.7063	-51.1933	-15.6	6.68104	35.3779	87.4534	158.831	233.883	336.054
125.55	-171.413	-137.437	-100.562	-46.8308	-10.7788	7.59037	36.5218	85.4207	159.626	236.033	338.284
125.6	-176.442	-140.198	-103.513	-47.7289	-13.7373	8.24866	36.9449	82.8944	155.183	238.826	341.581
125.65	-179.15	-140.257	-103.074	-51.4532	-23.3586	7.36925	38.7498	82.2336	151.474	240.038	343.543
125.7	-178.106	-136.291	-99.4224	-52.7321	-29.7363	4.59152	43.6395	82.7694	150.612	239.858	344.433
125.75	-175.134	-130.26	-91.2437	-51.3825	-27.52	1.30562	49.4859	82.5995	151.379	239.335	345.082
125.8	-170.447	-126.391	-81.3948	-50.5615	-21.2296	-0.0728884	51.908	81.6842	152.428	239.678	343.586
125.85	-165.904	-126.273	-77.3484	-49.6052	-16.5496	2.25384	49.6971	81.1515	152.99	241.658	340.595
125.9	-163.562	-127.304	-79.7491	-46.7982	-16.6327	6.47951	45.2768	81.9745	152.475	244.059	340.813
125.95	-164.373	-129.562	-82.9477	-45.4329	-20.9809	8.16989	41.6099	84.5037	150.248	245.335	345.769
126	-168.993	-133.274	-83.935	-49.1164	-24.1374	6.87609	40.5075	87.3351	145.942	245.252	350.611
126.05	-175.08	-134.37	-84.8525	-56.6005	-23.7114	6.06146	40.4687	88.7524	140.729	243.411	350.152
126.1	-178.915	-132.736	-88.4034	-63.7733	-23.9392	6.39022	39.7262	88.566	138.056	240.078	346.579
126.15	-178.016	-132.413	-92.9869	-66.4341	-27.0016	6.32196	39.3014	87.428	139.782	237.916	346.946
126.2	-172.162	-134.707	-94.7305	-64.8552	-30.5499	6.14363	39.2048	85.9936	142.856	237.557	350.651
126.25	-167.146	-138.889	-92.6536	-62.4127	-32.3908	7.37345	38.4537	85.3599	143.883	237.005	350.017
126.3	-169.771	-142.101	-89.6398	-59.3901	-31.2532	10.6705	38.1587	84.7381	143.863	237.151	344.492
126.35	-176.986	-140.9	-87.7521	-56.4453	-26.5067	14.2483	38.8669	82.1745	143.957	239.926	341.655
126.4	-180.942	-136.532	-85.6244	-56.7559	-19.9963	14.9402	40.561	78.8214	144.212	243.727	344.547
126.45	-181.137	-131.382	-85.0359	-60.0715	-15.1261	12.8795	43.6936	76.3937	146.326	246.162	349.466
126.5	-179.792	-127.064	-89.3083	-62.5876	-13.3452	10.4194	45.2852	74.2305	150.311	247.062	352.834
126.55	-177.551	-125.295	-94.2207	-61.5332	-13.4333	8.4916	42.4009	72.2743	152.198	246.943	352.922
126.6	-176.31	-127.421	-94.4676	-58.4774	-15.2937	7.40051	37.6506	72.471	149.391	245.592	349.793
126.65	-176.913	-133.83	-93.1003	-56.748	-19.9788	6.31309	34.441	74.29	144.988	243.06	346.596
126.7	-176.886	-140.036	-94.7015	-57.5332	-24.5171	3.85775	34.2662	73.8195	143.393	240.648	346.126
126.75	-174.831	-140.207	-97.9079	-60.3888	-24.873	0.779496	36.4109	70.4429	144.215	239.053	347.628
126.8	-173.103	-136.48	-97.7867	-63.8122	-21.8605	-0.571873	37.988	68.3125	144.172	237.927	348.987
126.85	-174.174	-134.362	-94.0102	-65.9131	-16.72	2.04737	38.8614	69.6308	143.336	237.333	349.52
126.9	-176.902	-134.791	-91.9204	-67.3783	-8.99178	8.50419	40.5384	74.5473	144.481	237.359	349.838
126.95	-178.196	-135.229	-93.6368	-67.8193	-4.22903	14.2546	41.902	83.2071	146.745	238.76	349.797
127	-178.031	-134.243	-95.3124	-64.7517	-9.01691	14.0948	43.0527	91.4188	147.305	241.644	347.684
127.05	-179.165	-132.555	-93.8719	-57.5677	-19.2012	8.77398	43.9888	93.1624	149.153	243.288	343.783
127.1	-182.169	-132.228	-89.4815	-50.9908	-25.6913	4.95692	40.9504	88.8411	154.053	242.437	342.558
127.15	-184.604	-135.144	-84.4611	-51.5618	-26.9637	5.91879	35.1697	83.633	154.651	242.253	346.31
127.2	-185.177	-140.095	-82.3771	-57.9059	-25.6668	7.18964	33.6401	79.7052	147.558	245.635	350.404
127.25	-183.672	-143.493	-84.7368	-61.7159	-22.8323	3.66067	36.7006	75.944	140.69	252.204	349.768
127.3	-179.555	-142.703	-89.1469	-60.3436	-19.6473	-2.317	38.5948	72.432	139.263	256.691	344.942
127.35	-175.02	-137.829	-92.3881	-58.7245	-17.6686	-5.01334	37.1202	71.4115	139.439	253.391	339.181
127.4	-174.494	-132.409	-93.2635	-60.2529	-17.8326	-3.10808	35.7922	73.3806	138.39	246.008	335.798
127.45	-177.772	-131.018	-92.9985	-63.0443	-19.3566	0.635338	39.2485	75.4645	137.268	242.979	337.712
127.5	-180.048	-134.113	-94.0246	-64.9729	-20.5637	1.93242	45.6333	77.1681	136.281	244.693	342.707
127.55	-180.156	-138.202	-96.7797	-66.6559	-21.4075	-1.18995	46.062	79.7334	136.2	245.652	345.643
127.6	-180.593	-140.049	-98.9741	-67.5765	-23.3607	-4.08674	38.4865	80.8951	138.95	243.036	347.199
127.65	-181.933	-138.985	-99.1412	-65.8996	-25.7763	-2.275	30.9147	80.405	144.228	239.512	348.993
127.7	-183.157	-136.669	-97.2716	-62.264	-26.5035	1.6009	27.2423	83.3236	149.3	239.38	348.377
127.75	-183.004	-135.536	-93.875	-59.6588	-24.1392	4.57265	26.6781	90.8712	150.46	241.739	347.055
127.8	-180.659	-135.904	-91.5199	-60.6025	-19.9143	7.40542	29.4547	94.8004	147.472	242.863	349.344
127.85	-178.225	-134.843	-92.7958	-64.4762	-17.8504	7.7792	34.9082	86.7884	144.849	241.653	352.069
127.9	-177.511	-130.741	-95.8683	-67.4218	-20.1491	3.84932	41.5594	72.7787	146.514	239.346	349.813
127.95	-176.822	-127.073	-96.5549	-66.7157	-23.196	0.464862	45.465	67.6961	151.051	238.534	344.034
128	-176.132	-127.286	-94.1058	-64.4029	-22.0696	2.88694	42.6972	72.9028	153.651	238.925	337.264
128.05	-177.226	-129.141	-91.7734	-63.7723	-18.4322	9.14328	37.8495	80.0956	151.689	237.728	329.545
128.1	-178.394	-129.749	-92.5464	-65.0085	-17.9035	13.3512	38.2182	86.215	147.03	236.59	323.925
128.15	-176.834	-129.776	-94.8317	-65.4258	-21.3752	13.5417	40.2143	89.729	142.591	236.89	324.03
128.2	-173.441	-128.771	-94.4969	-62.6325	-24.8906	11.6292	38.4338	90.082	140.246	234.8	328.278
128.25	-170.864	-125.006	-91.5957	-57.707	-25.6233	9.25336	35.5092	89.6082	139.934	231.384	332.806
128.3	-170.069	-121.38	-89.9686	-53.3695	-24.5426	7.70976	34.9088	88.8214	139.14	233.244	333.893
128.35	-170.748	-122.378	-91.0028	-50.4343	-24.3293	7.74739	35.5685	86.3377	137.454	238.13	330.512
128.4	-171.897	-126.075	-93.8497	-49.4652	-25.7157	8.18765	36.1474	83.415	138.302	236.864	326.452
128.45	-171.881	-127.813	-97.3602	-51.7334	-26.9207	8.34276	37.7407	82.0416	144.621	232.013	326.397
128.5	-171.116	-125.688	-99.4356	-57.4884	-26.4723	7.70979	40.6192	83.2314	152.019	235.001	330.57
128.55	-171.785	-120.312	-99.8124	-64.3522	-25.6044	4.92121	42.8248	86.0073	152.49	242.546	335.47
128.6	-174.971	-116.822	-100.24	-68.6267	-25.5811	1.29416	42.0952	87.6227	147.363	244.171	337.549
128.65	-179.485	-120.447	-99.8906	-67.914	-25.0676	0.894469	38.7664	86.2715	144.695	240.613	334.586
128.7	-182.252	-126.499	-97.2598	-63.0345	-23.7371	4.71407	36.9539	82.0111	145.178	237.752	328.065
128.75	-181.176	-127.266	-93.1803	-59.019	-23.7896	8.59711	39.6119	77.0925	144.711	239.095	325.518
128.8	-176.607	-125.176	-89.8261	-60.3461	-25.6428	8.1012	43.0384	75.2783	142.195	242.986	329.453
128.85	-170.256	-126.766	-89.3371	-63.9946	-27.533	4.37843	42.7354	79.0948	140.728	244.373	333.354
128.9	-163.313	-131.271	-92.0684	-63.9879	-29.1554	2.59762	40.4884	86.8427	142.96	243.026	335.354
128.95	-155.863	-133.626	-95.9687	-61.1502	-29.5511	4.1791	39.8136	91.9365	146.662	242.543	339.493
129	-151.831	-132.617	-98.8366	-60.6044	-26.0763	6.01868	41.3242	89.7395	149.571	242.08	345.898
129.05	-156.678	-131.054	-99.6467	-64.0477	-19.6212	6.37194	43.966	83.8814	152.433	240.919	350.34
129.1	-167.496	-131.124	-99.0048	-68.1722	-15.2754	6.32678	45.9099	79.932	154.43	240.612	350.567
129.15	-175.763	-131.925	-97.6216	-69.2751	-14.9365	6.86308	44.6796	78.9764	153.674	240.227	348.902
129.2	-177.406	-130.628	-94.2074	-66.8421	-16.868	7.01995	39.9431	79.5828	151.735	239.253	347.029
129.25	-174.754	-125.219	-89.7227	-62.6926	-19.0141	6.4426	33.6753	80.6363	150.917	240.238	343.339
129.3	-172.756	-119.884	-87.4621	-58.1798	-19.0261	7.51245	29.0917	81.8183	149.67	244.203	340.052
129.35	-174.386	-123.303	-88.1138	-53.4628	-16.6606	11.3613	29.9975	83.4818	145.583	248.139	340.927
129.4	-178.035	-134.215	-88.277	-49.9071	-13.74	14.7396	36.7933	86.987	140.653	250.096	343.478
129.45	-179.607	-141.51	-84.5781	-49.8822	-10.0919	16.1091	44.2608	92.1247	139.101	251.561	343.315
129.5	-178.099	-140.818	-79.2231	-53.3475	-7.00174	16.2175	47.495	95.1753	141.105	252.483	340.756
129.55	-175.8	-137.69	-78.6783	-58.1064	-8.67394	15.1186	45.765	93.3667	143.349	250.37	338.315
129.6	-172.911	-137.339	-85.9092	-62.3203	-14.771	15.0789	41.2989	89.3769	143.233	244.244	337.602
129.65	-169.764	-138.997	-96.06	-63.6519	-20.5247	17.2788	38.0323	88.1581	140.738	236.376	339.211
129.7	-169.391	-139.062	-102.167	-59.1303	-24.5529	16.5476	38.8051	90.1338	138.076	230.007	341.366
129.75	-172.343	-136.89	-103.257	-51.4234	-28.918	11.1326	42.8863	90.462	137.837	226.561	340.167
129.8	-175.743	-134.828	-102.535	-49.7642	-32.079	6.36558	46.9436	86.1132	140.62	225.109	335.327
129.85	-177.45	-134.583	-101.287	-57.9509	-29.923	4.7707	48.6846	79.2595	145.233	224.454	331.092
129.9	-176.275	-136.207	-99.6113	-68.4246	-23.0658	4.15217	47.9321	73.417	150.77	224.75	330.766
129.95	-172.589	-137.897	-98.21	-72.7401	-14.8059	3.5195	44.6089	69.6929	155.746	226.71	334.657
130	-168.123	-137.676	-97.6026	-70.3693	-7.01442	2.94851	40.2327	67.4424	156.536	230.977	340.391
130.05	-164.556	-135.642	-97.3238	-66.1423	-4.69921	2.08275	37.6781	66.9835	152.612	236.686	343.407
130.1	-163.836	-133.082	-96.4699	-64.1247	-12.2811	2.76471	36.4202	69.9885	149.878	239.753	342.365
130.15	-165.54	-130.534	-95.0307	-64.0046	-24.3218	7.27998	34.7495	75.692	150.972	237.341	340.725
130.2	-166.348	-128.445	-93.0958	-62.2621	-31.3874	14.2646	34.872	79.2163	152.059	233.583	340.067
130.25	-164.948	-127.099	-90.529	-58.1374	-31.0029	20.98	39.187	76.6847	151.007	232.771	339.287
130.3	-162.685	-127.297	-88.9024	-55.7169	-27.3849	25.2383	43.5985	71.6231	149.018	233.598	338.975
130.35	-160.954	-129.459	-89.8078	-56.4456	-24.339	24.1268	42.1057	70.9153	146.845	234.237	339.282
130.4	-160.933	-131.922	-92.3837	-57.0589	-22.6292	16.9562	36.8365	76.1565	145.506	234.645	338.652
130.45	-163.039	-132.794	-95.1513	-56.1353	-21.8294	8.71945	35.4473	84.7199	146.189	232.895	338.233
130.5	-166.225	-132.465	-97.3758	-55.4187	-21.5315	3.87619	41.1956	93.936	147.852	227.944	340.186
130.55	-168.596	-132.278	-98.7218	-56.5538	-22.8586	0.944273	51.7405	98.5185	148.512	224.502	342.991
130.6	-170.237	-132.009	-99.4183	-58.8819	-26.5963	-0.963515	60.7125	94.0887	149.395	227.29	344.603
130.65	-172.544	-130.217	-99.763	-60.7058	-30.8872	-0.47646	60.779	86.052	152.279	233.944	346.144
130.7	-174.94	-126.673	-99.8315	-62.2777	-34.1301	1.3755	51.2924	83.6145	155.264	240.003	347.584
130.75	-176.456	-123.757	-99.0123	-63.1453	-35.2807	2.41583	39.2899	87.3794	154.714	244.481	346.396
130.8	-178.705	-124.423	-97.809	-61.1981	-33.2311	1.99596	30.7199	93.8346	150.055	246.577	343.16
130.85	-183.056	-128.505	-99.0436	-56.7156	-29.7198	0.861501	27.1482	101.479	145.636	245.311	342.226
130.9	-187.081	-133.108	-102.393	-52.9895	-27.0669	1.01083	28.778	106.148	145.323	242.391	344.746
130.95	-184.956	-136.679	-104.002	-52.7491	-25.1264	2.66607	34.0432	101.27	148.02	240.716	346.813
131	-173.992	-139.927	-103.513	-55.3453	-24.0548	3.68717	39.088	87.9295	151.366	241.241	345.165
131.05	-161.218	-143.435	-103.057	-57.9626	-24.4489	3.48107	41.8179	76.8832	154.977	242.261	341.094
131.1	-156.399	-146.552	-103.871	-58.6615	-25.7782	2.30728	42.8403	74.1187	158.547	242.795	339.103
131.15	-158.246	-147.308	-105.359	-57.7358	-27.6421	-1.21775	43.3841	74.9636	161.164	242.993	341.936
131.2	-158.522	-143.143	-104.877	-57.198	-29.5054	-6.4382	44.7681	75.1252	161.386	241.122	347.179
131.25	-156.901	-136.436	-102.538	-58.063	-29.7625	-9.24111	46.1862	75.0831	157.019	236.874	350.937
131.3	-159.126	-134.263	-102.125	-58.5229	-27.9646	-7.52912	44.7702	74.4549	148.967	233.973	351.837
131.35	-166.079	-138.258	-105.154	-58.111	-26.6456	-3.6199	40.8135	72.2508	142.238	236.566	350.566
131.4	-173.086	-142.584	-109.084	-59.1191	-28.4879	0.0643417	38.3151	70.0011	140.522	245.198	347.925
131.45	-175.254	-143.503	-107.453	-62.4646	-31.7236	3.66668	38.9332	70.2151	143.382	253.481	344.474
131.5	-173.07	-143.086	-95.8068	-66.4688	-33.5485	7.06877	39.6138	73.1967	146.788	252.313	341.352
131.55	-171.43	-143.002	-81.0941	-69.7274	-33.53	8.1872	38.3502	77.3028	147.089	241.16	340.273
131.6	-171.373	-141.786	-74.9471	-72.0332	-32.2178	7.33125	37.4431	81.3282	145.662	228.937	341.789
131.65	-171.503	-138.187	-78.4629	-72.6915	-30.1333	6.9294	37.8417	84.2645	145.024	222.111	345.239
131.7	-172.677	-132.548	-84.6039	-68.3135	-27.9535	6.01097	37.4803	84.8572	144.092	219.649	348.391
131.75	-174.937	-126.824	-88.8712	-56.5896	-27.4132	2.25495	37.415	83.3204	142.236	219.393	346.617
131.8	-176.071	-124.988	-91.1755	-43.7491	-31.3692	-2.82432	39.5941	80.8798	140.772	220.003	338.359
131.85	-174.059	-128.53	-93.9705	-39.2767	-39.7256	-5.05936	41.5131	79.3295	139.801	220.334	330.021
131.9	-170.058	-134.422	-98.4894	-43.7476	-47.2831	-2.51772	41.9205	80.4188	139.691	222.06	327.124
131.95	-168.572	-137.337	-101.659	-51.2219	-47.2623	2.88614	42.3901	83.72	140.923	226.34	327.324
132	-170.928	-135.571	-101.591	-57.8861	-37.9285	8.12252	41.835	86.3613	142.299	230.712	327.177
132.05	-173.913	-132.988	-99.9447	-62.1752	-26.1214	10.2788	38.8655	85.6856	142.295	233.131	327.428
132.1	-175.544	-132.292	-97.2745	-64.0478	-22.3714	7.73156	36.2589	83.1256	140.827	233.062	328.925
132.15	-175.825	-132.686	-94.2503	-65.0903	-29.5268	2.49844	37.5472	82.6083	139.831	230.758	330.141
132.2	-175.066	-133.921	-92.4431	-64.7889	-39.311	-1.87307	41.5172	83.9733	140.899	227.351	328.711
132.25	-174.128	-135.36	-91.3368	-61.1512	-43.8876	-1.46144	43.4502	84.4623	142.752	223.951	324.454
132.3	-173.59	-135.239	-90.7653	-56.7543	-43.7303	6.34578	41.8425	83.9575	143.617	222.125	321.309
132.35	-173.062	-133.267	-93.2811	-54.9809	-41.5749	16.1669	38.8944	83.2357	144.313	221.838	322.286
132.4	-172.383	-130.961	-98.606	-54.9201	-37.9348	18.4657	35.5755	82.6909	146.473	220.132	325.013
132.45	-172.013	-130.556	-101.809	-54.2305	-32.9432	13.5918	31.8185	82.5877	149.857	217.098	326.434
132.5	-172.045	-132.491	-99.8377	-51.5427	-27.8837	8.696	30.771	81.8918	152.68	216.497	327.338
132.55	-172.392	-133.396	-95.6457	-48.334	-25.2285	5.62039	35.2911	79.6309	154.055	218.199	329.666
132.6	-173.422	-131.181	-92.3253	-49.1363	-26.3764	2.21589	42.0168	77.3537	153.826	219.844	332.57
132.65	-176.093	-129.494	-89.1391	-53.8935	-29.0153	-2.27326	45.8447	76.4367	152.31	221.063	333.91
132.7	-179.487	-132.024	-86.2534	-56.8609	-29.4768	-6.08184	45.9857	74.6318	150.147	221.051	333.808
132.75	-181.259	-136.036	-85.6141	-55.7105	-26.9175	-5.56424	43.3875	70.5283	146.095	219.039	332.695
132.8	-180.324	-136.971	-86.8527	-53.836	-24.4021	-0.448903	38.9417	69.3782	139.614	215.983	330.36
132.85	-177.5	-135.828	-88.3923	-53.9246	-25.2664	4.03077	35.5942	76.9052	134.536	213.241	327.605
132.9	-174.838	-135.474	-89.8035	-54.4157	-28.568	4.13639	34.8276	89.5597	134.112	211.465	325.318
132.95	-173.248	-134.306	-91.3683	-54.1588	-30.8453	0.6907	34.1837	96.8406	134.987	210.952	323.735
133	-171.427	-131.384	-93.4894	-54.4412	-31.4179	-2.56831	33.7401	94.5205	132.34	212.104	323.377
133.05	-168.805	-129.495	-96.6345	-54.8711	-31.5054	-1.30342	36.2376	88.8098	129.172	215.716	324.21
133.1	-167.819	-129.504	-99.8014	-54.5332	-30.7019	3.92447	39.8813	84.4094	131.986	220.518	325.163
133.15	-171.033	-129.605	-100.016	-55.6611	-27.893	6.57181	40.9031	79.9376	137.913	223.307	326.035
133.2	-177.23	-128.913	-96.4718	-57.6286	-23.6193	3.07913	40.4402	74.6616	139.248	222.121	327.213
133.25	-180.876	-128.617	-93.4764	-56.3744	-20.4865	-1.8896	40.1028	71.5097	137.52	217.229	328.6
133.3	-178.803	-129.678	-92.6855	-53.7359	-20.4943	-1.76669	38.4455	74.3784	138.941	212.235	330.178
133.35	-175.523	-130.397	-91.8368	-54.9511	-22.9623	1.90075	36.614	82.2285	142.716	213.056	331.603
133.4	-176.223	-129.521	-91.6887	-58.5904	-26.2175	3.66625	37.5235	88.0305	144.524	220.843	331.583
133.45	-180.042	-129.011	-93.4713	-59.313	-29.2162	4.79615	40.016	88.7637	144.034	229.194	328.678
133.5	-183.485	-130.836	-96.1868	-57.3413	-31.4762	8.46282	41.0482	87.9198	143.154	231.372	321.593
133.55	-184.87	-133.544	-98.9266	-57.7254	-32.8579	11.2926	38.9582	87.0405	142.863	227.998	310.863
133.6	-182.549	-134.817	-100.987	-59.8223	-32.0085	10.0271	33.6707	84.9219	145.093	224.059	303.429
133.65	-175.802	-134.311	-101.938	-58.6762	-28.4715	7.66333	28.7027	81.2964	150.123	221.284	308.855
133.7	-168.532	-132.116	-102.974	-55.8838	-25.4366	7.11511	29.2102	77.1093	153.142	218.848	325.309
133.75	-165.689	-129.213	-104.636	-56.6081	-25.4824	8.00053	34.2286	75.6014	151.543	216.77	338.88
133.8	-167.679	-127.52	-104.887	-59.6973	-26.5757	9.12974	38.3836	80.1535	148.509	214.331	341.505
133.85	-169.77	-128.127	-102.272	-60.3643	-25.9478	7.89879	39.7686	86.2453	147.509	211.807	338.702
133.9	-167.396	-130.579	-99.0482	-58.2196	-23.5981	3.34456	38.6267	86.1521	149.533	213.151	336.886
133.95	-163.364	-133.418	-97.4531	-56.8873	-21.5192	-1.42854	35.5431	81.639	153.219	219.994	334.861
134	-163.716	-134.757	-96.3769	-58.0171	-20.8764	-3.23398	33.0954	80.8904	155.164	227.472	330.402
134.05	-168.702	-132.875	-95.0407	-58.7359	-21.6297	-2.95328	33.3032	85.6749	153.341	230.581	325.432
134.1	-174.016	-129.244	-94.4128	-56.5774	-24.5453	-2.51007	35.7058	89.964	148.772	228.6	324.248
134.15	-177.25	-127.499	-94.9132	-55.6862	-28.3205	-2.57134	39.1025	89.4667	144.683	224.455	329.15
134.2	-179.636	-127.571	-95.3899	-59.4266	-30.3922	-3.1504	42.1661	86.3621	143.761	222.281	336.036
134.25	-180.633	-128.493	-93.1793	-63.4541	-31.7527	-4.68943	43.0227	83.0981	145.375	222.268	338.189
134.3	-179.07	-131.224	-88.7012	-64.0147	-32.4815	-7.53689	41.449	79.6709	147.818	221.504	334.475
134.35	-178.288	-133.997	-85.8847	-62.5131	-30.0935	-10.1427	39.6378	76.7729	150.223	219.663	328.437
134.4	-179.956	-133.067	-85.076	-60.5219	-26.868	-9.10755	40.0507	75.7677	151.566	217.751	324.344
134.45	-180.03	-129.146	-83.8673	-58.3795	-27.4373	-3.81062	43.7139	76.2936	151.799	216.612	325.717
134.5	-177.042	-126.394	-82.7337	-57.259	-30.4273	1.51427	47.1903	77.9079	152.496	217.761	331.889
134.55	-174.351	-125.444	-83.3502	-57.3615	-31.6462	3.71682	45.8207	80.7189	152.607	221.05	337.646
134.6	-175.25	-124.405	-86.5984	-57.1656	-30.7046	4.26334	40.8387	82.762	149.685	224.943	337.965
134.65	-178.911	-123.499	-90.3072	-56.0937	-30.1186	4.47172	36.3882	82.2116	145.019	228.137	333.058
134.7	-179.689	-122.813	-90.9846	-56.4059	-30.1122	4.05332	33.9845	82.151	140.281	229.276	327.939
134.75	-176.322	-122.459	-89.5316	-58.0377	-28.4069	3.92111	33.8937	84.1709	135.418	227.584	326.351
134.8	-173.856	-123.865	-88.9462	-56.8357	-24.5531	4.37038	35.8132	84.5153	132.791	224.303	327.347
134.85	-174.025	-126.771	-89.9264	-52.8543	-21.1755	3.59583	38.4219	83.0718	135.523	222.937	328.731
134.9	-175.795	-129.098	-91.2352	-51.2838	-20.4484	1.18114	40.1521	84.2633	143.48	225.009	330.247
134.95	-178.623	-128.882	-91.7906	-53.9368	-21.6693	-0.699051	39.5601	87.7385	152.266	227.101	332.832
135	-180.509	-127.069	-91.4886	-58.6794	-23.198	0.523298	36.9602	88.4201	156.311	226.853	335.992
135.05	-178.47	-126.59	-90.218	-61.8404	-24.4854	4.79239	34.4778	85.2758	155.231	227.266	337.181
135.1	-173.202	-127.637	-88.3974	-60.2428	-25.4813	8.37962	33.1903	81.3928	153.607	230.31	333.758
135.15	-171.521	-128.283	-87.5865	-55.3928	-25.9135	7.41836	32.7888	79.1128	153.047	232.455	328.324
135.2	-175.648	-127.807	-87.4313	-50.8444	-25.1613	2.96099	33.2066	78.6696	151.769	231.471	326.208
135.25	-177.471	-125.974	-86.5889	-47.6022	-24.8649	0.76639	34.5762	78.2795	151.068	231.697	326.033
135.3	-172.182	-124.419	-85.6696	-45.7386	-26.7098	3.09337	35.7969	77.2042	151.973	234.597	323.436
135.35	-164.675	-127.518	-87.5505	-44.9671	-28.292	6.3703	35.4925	77.1052	152.229	234.756	320.494
135.4	-160.015	-136.316	-93.4542	-45.4138	-27.5296	7.86285	34.8151	78.0953	151.429	230.654	321.391
135.45	-159.185	-144.613	-97.9749	-47.9273	-26.9908	8.53824	35.1918	77.5316	151.326	226.004	325.524
135.5	-159.779	-145.446	-95.3701	-51.3213	-29.3416	9.26379	36.1759	75.388	151.873	223.169	330.068
135.55	-159.281	-139.092	-89.9151	-53.2376	-32.8884	9.02668	37.188	74.2893	151.234	222.577	332.85
135.6	-161.253	-133.349	-89.0931	-53.8944	-34.4327	6.89539	37.9085	73.9247	148.451	222.467	332.734
135.65	-168.182	-134.271	-91.86	-55.859	-32.7178	3.06638	38.2237	72.8326	145.246	220.089	332.2
135.7	-172.842	-138.264	-92.4258	-59.8684	-27.7915	-1.00314	39.0707	73.4636	143.354	216.436	334.328
135.75	-171.118	-139.259	-89.0221	-63.8523	-22.6822	-4.01323	40.5442	77.6331	141.316	214.469	336.031
135.8	-167.977	-136.146	-84.9296	-66.1901	-21.2559	-5.98341	40.6395	81.8742	138.957	215.324	332.375
135.85	-167.496	-131.703	-84.5995	-68.6347	-22.6029	-5.89603	38.1431	83.2763	139.001	217.156	325.376
135.9	-169.931	-129.66	-89.7688	-73.9787	-22.998	-3.67393	35.282	83.9884	141.544	217.613	321.507
135.95	-172.512	-129.674	-96.8607	-79.1599	-21.0842	-2.60189	35.027	85.962	143.821	217.245	322.876
136	-172.154	-128.714	-101.117	-78.2661	-18.1228	-2.91636	37.0723	88.1236	144.733	217.62	326.394
136.05	-171.225	-127.991	-100.907	-72.045	-15.0031	-1.68408	38.8849	88.8379	145.811	217.075	330.401
136.1	-171.866	-128.801	-98.8816	-65.7592	-10.9944	-0.383227	39.1762	87.8239	148.096	214.545	333.966
136.15	-173.319	-128.83	-98.1048	-63.2313	-8.18255	-1.8806	37.5423	85.3949	149.588	211.704	334.008
136.2	-176.092	-126.76	-97.9121	-64.1899	-10.5333	-4.52397	34.7155	82.0771	148.013	207.559	330.103
136.25	-179.415	-123.37	-96.7463	-64.9573	-15.4978	-5.65822	32.1592	78.5099	144.652	201.709	326.231
136.3	-179.907	-120.229	-96.4362	-63.7657	-18.6897	-3.08619	30.146	76.879	142.723	198.716	324.489
136.35	-178.387	-119.708	-98.0217	-61.3565	-20.6952	3.41892	30.7592	77.7967	143.252	200.729	324.704
136.4	-179.333	-121.849	-99.7773	-58.6674	-22.5262	8.0841	35.5179	79.0568	144.675	205.041	327.954
136.45	-181.487	-123.356	-99.1921	-58.8287	-23.427	7.81293	40.1771	78.7546	145.519	209.223	333.303
136.5	-181.776	-122.972	-94.3204	-63.4786	-23.4576	7.18904	41.3016	79.2426	145.674	211.972	336.724
136.55	-181.497	-123.593	-87.0577	-68.069	-23.6601	8.02967	40.335	82.8235	145.482	212.271	335.546
136.6	-181.368	-123.827	-83.6893	-70.0269	-25.0785	7.98077	38.198	85.0187	144.167	210.941	331.07
136.65	-180.395	-119.182	-85.5616	-72.3347	-25.2163	6.31534	36.8805	79.9434	140.921	210.38	326.502
136.7	-178.714	-113.146	-88.0409	-72.4642	-21.9803	3.03644	37.3023	70.6818	137.882	210.487	323.226
136.75	-176.742	-113.444	-88.2861	-64.7688	-18.748	1.05598	36.642	65.1353	137.988	209.595	320.974
136.8	-175.318	-120.089	-89.0768	-54.6333	-17.8837	2.27211	35.2009	66.3226	141.565	209.019	321.41
136.85	-175.653	-128.105	-92.4542	-52.1365	-19.1503	3.04522	35.3915	71.3851	146.457	209.523	325.3
136.9	-176.906	-134.319	-94.6251	-56.4063	-26.3611	1.31578	36.0199	74.3154	149.845	208.678	328.853
136.95	-176.831	-136.853	-93.9824	-61.7862	-36.1997	-1.56191	37.2259	72.0047	150.528	205.896	329.984
137	-174.223	-135.294	-95.16	-66.3355	-36.8723	-4.44448	41.2426	67.365	148.339	203.711	330.479
137.05	-170.979	-131.254	-99.5073	-69.9871	-29.5723	-5.43604	46.0988	64.9959	144.581	202.555	330.029
137.1	-171.06	-126.314	-103.483	-71.556	-26.012	-3.53556	47.2642	67.3842	142.512	202.227	327.212
137.15	-174.738	-121.883	-103.465	-68.7361	-27.1271	0.100414	43.7403	74.4989	142.165	203.363	323.964
137.2	-177.236	-120.689	-98.8649	-63.5911	-28.4713	4.12662	40.1215	83.9114	141.143	202.751	322.862
137.25	-175.224	-124.775	-93.7602	-62.4603	-28.2503	8.37776	39.8961	92.3507	140.338	199.157	322.418
137.3	-171.281	-131.693	-92.2294	-65.1689	-25.5693	12.6282	40.345	95.4561	140.109	199.305	320.264
137.35	-170.237	-136.012	-93.9949	-66.6708	-22.6225	14.888	39.3242	91.3624	140.078	204.668	317.722
137.4	-173.203	-135.068	-97.2939	-66.9246	-21.654	14.2567	37.609	84.4162	141.154	208.666	317.303
137.45	-176.585	-131.275	-101.422	-68.0121	-21.4884	12.1062	35.0582	79.8454	141.577	208.817	319.48
137.5	-177.022	-127.864	-104.797	-68.6317	-21.9542	9.21905	34.8098	79.1936	140.45	207.265	323.381
137.55	-175.194	-125.509	-105.772	-67.8933	-24.0967	5.70671	41.2935	79.9768	139.902	206.502	325.816
137.6	-173.825	-124.57	-105.132	-67.4407	-26.0869	1.52014	49.3017	78.7096	138.979	207.79	324.844
137.65	-174.55	-125.129	-105.119	-67.3753	-27.1229	-2.6975	50.4783	75.8014	135.11	209.065	324.372
137.7	-177.276	-124.943	-105.847	-66.168	-30.0288	-5.77265	46.9555	73.658	128.942	208.914	327.058
137.75	-180.692	-123.039	-103.757	-64.2569	-34.1983	-6.82588	44.8241	70.7638	124.362	208.656	329.424
137.8	-183.847	-121.139	-97.4041	-62.8894	-35.2235	-4.88008	44.8658	67.9702	125.899	208.489	328.267
137.85	-185.82	-120.604	-91.5981	-61.8429	-32.254	-0.229214	44.8347	73.4097	131.583	208.072	323.204
137.9	-186.28	-122.303	-91.0558	-61.6108	-28.9101	3.84169	42.7304	87.5368	133.102	207.292	318.77
137.95	-186.097	-125.22	-94.5151	-63.642	-28.5049	4.03737	39.9781	95.9244	129.338	206.354	321.439
138	-186.124	-125.948	-97.8305	-66.9509	-30.6775	0.874328	39.7632	92.6505	126.901	206.43	329.269
138.05	-185.329	-124.974	-98.4608	-67.9666	-32.2796	-1.87485	40.2366	86.2317	127.393	207.072	335.049
138.1	-182.577	-126.151	-97.4246	-65.1998	-31.7045	-2.55283	37.0619	83.5388	129.938	206.777	338.339
138.15	-178.614	-130.014	-97.8833	-62.2608	-30.2268	-3.33948	32.7302	84.7069	134.947	206.951	341.952
138.2	-175.462	-133.348	-100.741	-62.0528	-29.4466	-3.80152	32.3075	86.9354	137.861	206.634	343.815
138.25	-174.737	-134.458	-103.192	-61.9657	-30.0922	-0.433938	34.8775	88.3573	135.522	202.263	340.931
138.3	-176.107	-133.696	-103.267	-59.6856	-32.5218	6.7156	36.6033	88.5691	133.159	196.268	334.438
138.35	-176.502	-130.926	-101.836	-57.1503	-33.9912	12.7819	37.2574	88.3751	135.376	195.189	328.219
138.4	-174.119	-127.424	-99.4864	-57.5304	-30.7348	14.3786	37.6427	90.3932	140.517	201.392	326.392
138.45	-172.021	-126.713	-97.0881	-60.6275	-24.802	13.2845	36.0442	94.225	144.338	211.24	328.848
138.5	-173.358	-131.001	-97.4785	-63.0724	-21.243	12.0142	32.3154	94.8651	144.455	216.874	331.59
138.55	-176.46	-138.306	-100.553	-63.485	-20.5825	9.30446	29.2509	89.9628	142.537	216.611	333.497
138.6	-179.799	-143.518	-101.952	-61.817	-20.4289	3.8449	28.6467	81.7309	141.789	216.419	335.596
138.65	-184.577	-143.845	-99.7252	-58.7852	-19.5142	-1.50998	30.5571	74.2016	143.18	217.885	336.605
138.7	-190.021	-142.818	-96.8365	-57.9885	-18.9224	-2.63647	34.3155	70.5583	145.744	216.701	335.33
138.75	-192.803	-143.752	-95.5238	-61.4157	-19.9832	0.0337305	38.77	70.9441	147.416	211.65	332.013
138.8	-191.252	-145.203	-94.5443	-64.764	-21.8301	1.58305	42.9981	73.5266	145.928	208.704	328.796
138.85	-188.004	-145.199	-92.3908	-63.8132	-22.3247	0.00056419	45.8681	76.3294	140.993	212.755	328.022
138.9	-186.668	-144.177	-89.1493	-60.4135	-21.9718	-1.15128	46.4411	79.254	135.987	219.057	328.688
138.95	-188.445	-142.657	-86.0394	-59.3175	-25.1658	1.77677	46.1528	82.92	135.965	219.91	328.022
139	-191.4	-139.749	-84.0947	-62.5198	-31.8827	7.31087	47.5992	84.7733	142.047	217.4	325.714
139.05	-190.231	-135.448	-82.8581	-68.9856	-34.4723	10.7738	50.8098	81.4148	149.607	217.614	324.431
139.1	-182.461	-132.978	-81.9733	-75.2446	-29.7468	9.5912	52.3568	74.5317	152.881	220.849	326.64
139.15	-175.362	-135.115	-82.7622	-77.5356	-23.9648	5.3395	48.8808	69.8726	149.637	223.568	330.992
139.2	-176.284	-141.864	-85.195	-76.4285	-23.3866	0.722568	40.9984	70.2841	142.814	225.128	334.162
139.25	-180.942	-150.455	-86.903	-74.589	-27.2794	-2.38614	34.0569	72.9008	138.369	227.811	334.945
139.3	-181.835	-153.541	-88.0767	-71.5675	-31.6808	-1.71437	33.1958	74.8213	140.174	229.998	333.248
139.35	-179.03	-144.964	-90.606	-67.0907	-34.1211	4.31724	38.3179	77.0339	144.996	227.172	330.375
139.4	-176.57	-130.43	-94.0308	-63.8506	-32.421	13.0373	44.4774	79.627	146.74	219.822	329.431
139.45	-176.762	-120.822	-98.7493	-62.407	-26.6295	17.5744	46.8452	80.2122	144.43	214.449	330.459
139.5	-180.097	-118.488	-105.848	-60.4199	-21.6143	13.614	45.817	79.4199	142.166	216.71	329.628
139.55	-184.544	-118.998	-110.49	-58.3338	-20.5647	4.60543	45.0588	81.2958	143.322	224.228	325.679
139.6	-185.675	-120.219	-106.557	-59.3856	-21.635	-2.479	46.0239	86.9079	147.017	229.577	321.581
139.65	-183.596	-123.169	-97.2773	-63.7196	-22.407	-3.92877	48.1462	90.8698	149.583	229.485	320.34
139.7	-182.612	-127.36	-89.7483	-68.764	-22.3616	0.452649	49.5379	88.1568	148.749	225.734	321.876
139.75	-181.653	-130.967	-86.1189	-72.234	-22.3597	7.43474	47.3637	80.3352	145.417	220.554	323.585
139.8	-177.814	-132.705	-85.0366	-71.0535	-22.8211	11.7391	42.2352	72.5906	142.343	216.633	322.355
139.85	-174.065	-132.162	-85.2303	-64.381	-23.5666	12.3581	36.9621	69.3989	140.709	216.408	318.217
139.9	-173.864	-131.56	-86.2534	-57.4498	-25.5637	12.5122	33.3469	72.2747	138.728	218.461	315.616
139.95	-176.502	-133.005	-87.1942	-54.4517	-30.5821	12.7931	33.0923	79.0393	134.928	219.054	317.87
140	-179.536	-133.538	-87.456	-53.7488	-38.3222	11.7174	35.952	85.3023	130.687	217.3	323.585
140.05	-180.881	-131.79	-88.1902	-52.2988	-43.1784	10.4998	38.5769	86.4976	128.276	215.648	328.916
140.1	-180.491	-131.181	-89.4753	-48.7157	-38.9812	9.39707	39.0213	80.8091	128.094	216.76	331.385
140.15	-179.812	-132.075	-91.1311	-43.9526	-28.9654	5.47589	37.8368	70.8406	130.303	219.917	332.241
140.2	-180.35	-132.21	-94.2495	-41.0242	-21.5976	-1.33106	35.5965	62.3412	135.729	220.926	333.5
140.25	-182.856	-131.62	-96.3193	-42.7435	-19.0403	-8.41068	32.5908	61.3731	141.995	218.483	333.607
140.3	-185.626	-130.759	-94.7847	-49.2687	-18.8435	-13.842	29.797	68.0535	144.08	216.29	329.437
140.35	-185.372	-130.913	-93.4423	-56.1706	-20.4933	-14.4067	28.526	75.1592	141.54	216.591	321.886
140.4	-181.317	-133.733	-95.131	-58.8045	-23.4532	-7.88582	28.9648	77.9577	138.568	219.266	315.751
140.45	-175.622	-136.892	-97.537	-58.6463	-25.6836	2.54415	30.2401	77.7034	137.543	223.295	314.037
140.5	-171.164	-136.673	-98.3532	-59.5551	-26.2649	10.8366	31.6657	76.2711	138.251	225.974	315.9
140.55	-170.395	-133.092	-96.9925	-61.6033	-25.8265	12.2046	30.8346	75.1026	139.853	226.086	319.246
140.6	-173.341	-128.984	-94.8279	-63.1901	-25.2533	7.8581	25.6353	74.8976	139.915	223.912	322.54
140.65	-176.531	-126.016	-93.7175	-63.4557	-25.5317	5.17859	21.1731	74.774	137.617	219.305	324.995
140.7	-175.536	-123.288	-91.9949	-62.4413	-27.5425	7.72808	24.0074	74.1302	135.844	213.585	326.375
140.75	-169.488	-121.398	-87.6568	-61.2097	-29.8074	11.6625	31.0991	72.0587	135.877	209.512	327.607
140.8	-161.812	-123.376	-83.0128	-60.5053	-29.769	12.0992	36.2905	66.292	135.855	208.385	329.426
140.85	-155.743	-128.373	-81.7336	-59.4947	-27.9669	8.29479	38.2955	57.4476	135.076	209.069	329.694
140.9	-153.395	-132.102	-84.6147	-57.132	-26.1628	3.69869	38.1055	52.412	135.178	209.065	327.457
140.95	-159.314	-132.256	-88.8606	-53.9253	-24.1292	1.26622	37.7885	59.0874	137.499	207.9	324.976
141	-174.542	-129.346	-91.0607	-51.5999	-21.2919	2.3029	39.3164	75.6018	140.556	207.566	323.155
141.05	-189.021	-124.55	-90.6671	-50.4397	-18.5985	7.07032	42.4512	89.5936	141.985	208.379	322.493
141.1	-192.535	-118.743	-89.0802	-49.8411	-18.0636	11.9356	43.7687	93.1596	140.214	208.336	323.031
141.15	-188.187	-114.204	-87.8551	-50.8142	-19.9522	12.6669	41.2723	90.1206	135.056	207.789	321.541
141.2	-183.199	-116.529	-87.9709	-53.8764	-21.9774	11.7048	37.6967	87.1824	131.207	209.516	317.583
141.25	-178.48	-128.433	-88.7784	-56.7945	-22.8517	12.2429	35.1601	87.1414	135.459	213.867	315.701
141.3	-173.991	-141.346	-88.7858	-57.6503	-22.9703	12.7034	33.3739	89.4613	145.232	218.186	317.158
141.35	-171.437	-143.676	-86.766	-56.3349	-22.2178	12.2997	32.9765	91.5924	151.577	218.704	319.69
141.4	-171.424	-137.554	-83.1719	-52.9073	-21.3347	12.2586	33.4895	91.1121	152.272	212.57	321.169
141.45	-174.396	-133.629	-82.6414	-48.063	-21.8976	12.5111	33.8569	88.625	151.346	204.263	319.904
141.5	-179.633	-134.457	-89.7582	-44.3355	-23.3858	12.9201	35.737	85.8758	150.888	204.31	317.118
141.55	-183.098	-135.576	-100.231	-43.3634	-25.2441	12.8159	39.2116	83.2236	149.962	214.763	316.459
141.6	-182.103	-134.145	-104.146	-43.9527	-28.4235	10.985	41.2315	82.3416	148.484	226.077	318.083
141.65	-178.486	-130.195	-99.9142	-45.903	-31.4891	7.54962	41.2687	84.5987	146.752	230.956	318.047
141.7	-175.21	-126.369	-95.2448	-52.4409	-31.8133	3.94911	41.3881	87.1032	144.383	230.026	314.713
141.75	-174.691	-125.347	-94.5075	-64.2275	-29.66	2.31604	42.3666	86.3265	143.339	226.572	312.358
141.8	-179.163	-125.717	-95.2856	-73.4349	-26.5041	3.26066	43.3372	81.8598	145.625	222.842	315.574
141.85	-187.021	-125.239	-94.7723	-71.5331	-20.9794	5.14975	44.122	75.6427	148.417	219.468	321.599
141.9	-192.426	-124.162	-92.311	-63.3912	-12.61	7.18122	45.5317	71.6968	149.191	216.012	325.632
141.95	-190.906	-124.269	-89.4342	-60.5339	-6.86689	10.0576	46.4904	73.396	148.273	212.138	327.444
142	-183.717	-126.913	-88.5549	-63.8242	-9.52702	13.1067	44.9366	78.7195	146.272	210.797	328.168
142.05	-176.49	-131.049	-88.9562	-65.4782	-18.3765	14.5429	41.892	83.8108	145.356	214.862	328.335
142.1	-173.555	-134.077	-88.1815	-61.7492	-25.9395	14.9657	40.0891	86.9119	147.258	220.672	329.475
142.15	-174.986	-134.007	-86.6072	-55.3885	-28.084	16.5426	40.1031	86.4149	149.923	223.404	331.554
142.2	-178.949	-131.117	-86.5796	-52.1579	-26.2917	17.8745	39.9026	82.3741	150.408	223.423	331.199
142.25	-182.743	-129.23	-88.7753	-54.9161	-22.6118	13.1395	37.9354	78.1069	148.578	221.705	327.098
142.3	-184.537	-131.943	-91.7422	-58.5128	-17.6323	-0.0576486	35.1998	76.2839	145.824	218.903	323.04
142.35	-185.641	-137.664	-92.6059	-56.6833	-13.3399	-13.9702	34.5958	77.0053	143.054	216.793	321.664
142.4	-186.706	-141.526	-88.7583	-51.1647	-11.4582	-17.8966	38.6671	78.9366	140.764	215.699	321.696
142.45	-186.446	-140.004	-82.347	-47.07	-12.0938	-11.3335	46.2297	80.4425	139.885	215.367	321.91
142.5	-185.262	-134.082	-79.9343	-45.7898	-17.3943	-2.171	50.7874	80.7928	140.769	216.449	321.588
142.55	-183.245	-129.125	-82.6431	-46.9348	-26.8485	3.95362	45.5004	81.6148	142.34	218.389	320.849
142.6	-180.074	-128.816	-85.3987	-50.4364	-32.8663	6.48309	33.5926	84.8195	144.125	220.431	321.137
142.65	-177.883	-130.406	-86.3591	-54.5775	-31.507	7.51812	26.4319	89.7384	146.225	222.019	322.345
142.7	-177.526	-129.26	-86.8335	-57.5263	-26.8384	8.54854	27.8865	95.3176	147.791	222.261	323.144
142.75	-176.265	-125.756	-87.3364	-59.8813	-23.2837	7.45561	31.7213	100.991	148.615	222.898	323.813
142.8	-174.394	-122.828	-87.7555	-61.7631	-21.7178	3.15443	33.85	103.164	149.549	226.184	324.065
142.85	-175.255	-121.112	-87.99	-61.8232	-20.814	-0.471945	35.1378	97.9422	150.448	229.518	322.993
142.9	-177.881	-120.527	-87.087	-60.8336	-20.0784	-0.297302	36.7037	88.5429	151.188	228.761	320.941
142.95	-178.261	-122.009	-84.9096	-60.6622	-21.1065	2.62552	39.7516	83.6059	153.69	224.021	318.205
143	-176.299	-125.337	-83.3537	-60.7437	-24.1051	6.42792	44.2692	85.7129	158.77	218.917	316.559
143.05	-174.294	-128.355	-82.2893	-60.5682	-27.0037	9.72316	47.099	88.156	161.791	216.521	319.473
143.1	-172.656	-129.811	-80.0765	-61.0271	-28.0885	11.1554	45.1829	86.3782	157.102	218.158	325.486
143.15	-171.316	-130.896	-78.4009	-60.9791	-28.3676	11.0485	40.0792	83.6898	146.918	222.923	328.463
143.2	-170.98	-131.965	-80.2457	-58.9497	-29.2522	11.9982	36.6427	84.4739	139.414	228.171	326.044
143.25	-172.212	-131.432	-84.0591	-56.6017	-29.7259	14.6876	37.1347	87.9337	137.744	232.958	320.77
143.3	-174.114	-130.007	-85.9688	-57.2214	-28.7936	16.2881	38.7235	88.8025	137.138	237.947	315.43
143.35	-174.825	-130.048	-85.5203	-61.6193	-26.7774	16.7281	38.3175	84.0875	135.386	240.154	312.439
143.4	-174.852	-131.092	-85.0266	-65.7347	-23.4524	17.8181	36.2765	77.5801	136.088	235.437	314.001
143.45	-175.838	-132.051	-85.3873	-64.3617	-19.4125	16.5096	34.7947	75.0368	139.732	226.911	318.674
143.5	-177.481	-133.77	-86.3955	-59.4887	-16.9605	10.7656	35.8623	77.7544	143.679	223.827	323.225
143.55	-179.122	-135.667	-87.5728	-57.591	-16.8527	6.3902	39.5137	82.5549	146.621	228.741	327.808
143.6	-179.439	-135.306	-87.1345	-60.4904	-17.9034	7.85528	43.5493	84.4764	146.588	233.574	331.789
143.65	-176.948	-131.861	-84.9008	-62.5224	-20.1172	10.385	45.4955	80.7096	143.146	231.538	329.613
143.7	-173.57	-127.207	-83.1933	-58.0277	-23.3351	9.61911	43.638	74.9014	140.738	225.825	319.322
143.75	-172.284	-124.458	-82.3006	-50.5026	-25.8573	8.12111	39.32	72.8314	142.171	223.303	309.009
143.8	-172.512	-125.372	-81.6496	-47.437	-26.6814	8.6884	37.5773	75.2585	145.104	225.823	307.539
143.85	-171.968	-127.78	-82.4689	-49.2108	-27.4101	10.6254	39.912	80.0377	146.44	229.823	312.587
143.9	-170.063	-129.145	-84.5795	-51.5936	-28.8548	10.9702	41.9107	85.2354	145.956	230.636	316.101
143.95	-167.955	-130.072	-86.4045	-54.1346	-28.5125	7.04479	41.1564	87.7327	144.433	226.768	316.447
144	-167.582	-131.216	-88.1959	-57.8909	-25.1072	0.85071	39.9419	84.503	143.295	222.062	317.315
144.05	-168.8	-131.91	-89.9152	-60.4991	-22.3947	-2.45624	39.8476	76.6032	146.037	221.221	320.053
144.1	-168.429	-132.362	-89.8062	-59.5069	-23.0686	-1.43771	40.9842	69.2417	153.043	224.7	322.854
144.15	-165.642	-132.489	-87.4343	-55.6119	-24.6873	0.693344	44.0022	66.5446	157.148	229.523	323.881
144.2	-163.694	-131.143	-84.1222	-52.3737	-24.7139	1.50635	46.5401	68.6798	153.792	232.686	322.395
144.25	-165.378	-129.271	-81.8445	-53.1465	-24.724	1.35703	45.42	73.7266	147.956	232.788	319.586
144.3	-169.419	-130.126	-83.0621	-56.905	-26.9349	1.46059	42.403	78.2962	144.416	229.971	318.153
144.35	-171.739	-133.535	-88.7955	-59.6937	-29.6962	2.80251	41.1832	80.5421	142.998	225.831	319.559
144.4	-170.561	-134.174	-96.4398	-60.3866	-29.4302	5.66591	42.4791	81.7262	142.98	223.043	321.982
144.45	-168.842	-130.095	-101.939	-61.5948	-25.6948	8.14252	44.4877	82.3894	142.304	222.688	322.306
144.5	-169.9	-126.071	-102.71	-64.0144	-21.4267	8.40342	45.317	81.7705	139.876	223.623	320.164
144.55	-172.716	-125.662	-98.4757	-65.1648	-17.5812	8.17242	44.5907	80.9457	139.429	225.076	318.06
144.6	-174.036	-127.137	-92.1003	-62.9161	-13.4312	9.24511	42.7895	81.3504	143.42	227.161	319.208
144.65	-173.491	-128.215	-87.8106	-58.2125	-10.6775	9.85661	41.3586	82.9126	148.079	228.562	323.836
144.7	-171.798	-128.634	-87.0078	-54.5836	-11.1657	8.85022	41.1434	84.4707	150.421	227.402	327.863
144.75	-167.069	-128.965	-88.1881	-55.1108	-14.6138	7.72653	40.4601	83.5318	151.517	225.328	328.777
144.8	-160.434	-128.65	-88.2141	-58.718	-19.6405	7.55892	37.6357	79.0231	151.769	226.336	327.396
144.85	-157.296	-126.312	-85.5161	-61.6321	-23.4922	9.27152	34.4254	74.2253	150.238	230.318	323.905
144.9	-159.899	-122.719	-82.9302	-62.0752	-25.2898	12.3703	34.7446	73.455	147.49	234.039	320.061
144.95	-164.945	-120.673	-84.2089	-60.6784	-27.5527	13.1824	38.615	76.6816	144.789	236.971	319.364
145	-167.628	-121.634	-88.0097	-59.0083	-31.2346	9.89517	40.491	81.4993	143.359	240.753	321.605
145.05	-165.947	-125.38	-90.8405	-58.2897	-32.7205	5.55923	37.2039	86.5127	143.129	244.233	323.114
145.1	-161.614	-129.562	-93.7965	-56.7959	-28.495	4.21135	32.9534	90.1209	143.947	245.545	323.382
145.15	-157.993	-131.159	-98.9126	-52.6262	-21.5014	6.56951	31.461	91.2088	146.329	244.265	323.369
145.2	-159.406	-129.928	-102.801	-48.2627	-17.8319	9.54249	31.2425	90.7138	147.41	240.129	320.881
145.25	-167.064	-127.528	-102.392	-46.9025	-18.3072	10.1477	31.8706	89.229	144.368	234.157	316.428
145.3	-174.693	-126.49	-99.952	-47.7059	-19.7786	8.30229	36.7491	86.461	142.185	230.55	315.832
145.35	-177.243	-128.464	-97.6536	-49.0244	-20.1938	5.92818	46.126	83.8554	146.823	230.595	320.301
145.4	-176.908	-131.271	-95.1097	-52.4184	-20.4445	5.51121	53.3445	83.3618	154.912	230.682	323.544
145.45	-176.864	-134.944	-93.4873	-57.9605	-21.855	5.88866	52.9221	84.4269	158.814	229.413	323.377
145.5	-177.46	-141.264	-94.7091	-60.7684	-22.0138	2.41112	47.0298	86.35	155.305	229.659	322.922
145.55	-176.417	-145.865	-97.2414	-58.9505	-19.4521	-3.68713	40.7858	89.0831	147.987	232.765	322.846
145.6	-171.695	-144.344	-99.0145	-56.1126	-18.1956	-4.71001	37.6279	90.5528	143.518	235.51	321.642
145.65	-165.989	-138.199	-101.068	-54.0726	-19.764	0.840148	39.1023	88.2925	142.392	234.226	319.999
145.7	-162.663	-130.43	-103.152	-52.688	-20.0041	6.1639	44.2011	83.1555	139.872	230.128	319.754
145.75	-161.291	-125.263	-102.649	-52.0483	-17.3314	7.02471	49.0505	77.7682	136.186	228.149	322.193
145.8	-160.793	-124.958	-98.481	-50.094	-14.1116	5.14753	49.912	74.906	134.957	229.426	326.207
145.85	-159.299	-126.061	-92.865	-46.4585	-13.6572	5.18649	46.0582	76.0449	137.003	231.359	329.279
145.9	-156.667	-127.542	-89.5513	-44.4997	-18.3176	10.3461	40.7331	78.8182	141.078	233.09	331.103
145.95	-159.77	-131.297	-89.3213	-46.0248	-25.0125	17.5447	37.799	79.1686	144.245	234.596	332.126
146	-171.472	-134.843	-89.5011	-48.8108	-27.1804	20.9322	37.3126	76.6569	144.03	235.123	331.95
146.05	-181.419	-134.203	-89.2306	-49.2061	-23.92	19.5944	37.4007	74.8701	143.199	234.2	331.308
146.1	-180.056	-128.189	-89.797	-45.6835	-19.5252	17.3474	39.3399	76.8712	145.367	231.339	330.617
146.15	-170.647	-119.362	-90.9835	-40.1703	-17.6101	16.434	43.5809	82.0574	149.587	226.822	329.514
146.2	-161.673	-116.291	-91.4913	-35.5191	-19.3277	14.9527	45.4943	86.1718	152.945	223.598	328.958
146.25	-159.249	-123.157	-91.5184	-33.8846	-21.1489	12.7228	42.1271	85.4679	152.493	223.976	328.55
146.3	-163.102	-130.726	-92.3051	-36.0379	-18.4278	11.3182	36.9624	81.3482	147.533	226.639	327.101
146.35	-167.277	-131.64	-92.6455	-40.4978	-12.8542	9.48653	36.3135	78.6658	142.514	228.562	326.044
146.4	-168.027	-130.735	-90.0375	-45.928	-10.0129	8.19273	40.816	80.4714	141.562	227.109	326.044
146.45	-167.033	-131.76	-87.1545	-51.7352	-11.0182	11.191	44.8256	85.3946	143.095	223.022	326.023
146.5	-166.992	-132.294	-88.1917	-55.5004	-11.9924	15.0055	46.1831	90.1778	144.298	220.955	326.087
146.55	-168.247	-130.761	-89.8001	-56.2396	-10.2734	14.873	46.8035	94.1587	145.037	222.916	326.354
146.6	-169.473	-127.999	-88.7786	-55.716	-8.26784	14.3054	47.3877	96.6983	146.239	225.929	325.321
146.65	-168.396	-125.154	-89.2446	-52.7407	-8.66744	14.5596	48.5424	95.5006	147.51	227.405	323.562
146.7	-165.005	-122.336	-91.6158	-48.6275	-10.2602	13.3119	49.8244	91.649	147.486	226.668	323.3
146.75	-162.979	-118.708	-92.1098	-50.3062	-10.6842	14.091	49.5917	87.9007	145.871	223.918	324.65
146.8	-164.464	-115.034	-91.5367	-56.3992	-9.44133	17.3777	48.1848	84.2438	143.743	221.444	325.466
146.85	-166.669	-115.215	-93.184	-56.6472	-8.44781	16.9939	46.8093	80.5708	143.864	220.599	324.039
146.9	-165.495	-119.948	-96.5601	-50.8883	-8.76179	13.5253	46.2471	78.7064	148.496	220.287	321.399
146.95	-161.382	-124.665	-97.1555	-46.6781	-10.5191	11.8177	46.2278	79.3914	154.009	220.509	319.839
147	-159.383	-126.747	-93.8274	-47.6111	-16.3139	10.7115	44.6145	80.2129	155.822	222.232	320.751
147.05	-161.911	-128.244	-89.649	-52.293	-23.8904	8.53569	41.5491	79.9668	156.722	225.705	324.989
147.1	-165.944	-130.101	-86.2626	-55.8371	-24.713	7.30273	39.6679	81.7341	160.481	230.76	329.614
147.15	-168.322	-131.189	-84.0232	-55.7451	-19.5664	7.47479	38.5454	85.8369	164.413	234.43	329.921
147.2	-168.495	-130.869	-83.6992	-55.0383	-15.6929	8.10596	37.5753	86.9205	164.782	233.226	327.497
147.25	-167.273	-128.803	-85.1762	-54.9293	-14.3346	9.05377	37.9276	82.9798	160.522	228.287	327.189
147.3	-165.808	-125.723	-86.8606	-52.523	-13.9297	10.4725	38.3008	79.7391	152.969	223.575	329.426
147.35	-165.895	-124.681	-86.1008	-48.9015	-12.4703	12.9606	39.2683	83.1817	145.626	221.821	330.524
147.4	-168.14	-127.566	-83.2294	-48.8042	-10.7289	15.0725	43.682	91.75	141.018	221.323	327.847
147.45	-170.563	-131.918	-81.9699	-52.3096	-13.4695	12.632	48.8153	97.4026	138.882	218.447	324.822
147.5	-171.424	-134.126	-82.922	-55.0227	-20.0552	7.43784	49.9091	96.8952	138.798	215.992	325.892
147.55	-170.703	-133.016	-84.0938	-54.6297	-24.4105	5.2431	47.2099	94.6402	140.374	218.895	327.212
147.6	-169.036	-129.499	-85.8002	-52.4231	-26.0065	8.13564	42.6597	94.1302	142.45	224.55	322.804
147.65	-168.092	-125.941	-87.4056	-50.7113	-25.3818	14.0411	39.7512	94.5627	144.029	228.176	315.741
147.7	-169.527	-124.606	-86.5431	-51.0423	-21.6796	18.7539	40.8438	93.8861	143.912	229.038	312.855
147.75	-171.688	-124.981	-83.4011	-53.3688	-18.5477	19.7573	41.7942	93.4793	141.961	227.028	315.105
147.8	-170.827	-125.424	-81.1507	-55.9054	-19.9813	19.0257	40.0284	95.63	140.403	223.643	320.002
147.85	-165.977	-125.279	-82.3475	-55.5779	-23.3487	17.9699	39.2284	95.9212	141.154	222.375	325.194
147.9	-160.207	-123.975	-85.112	-52.3086	-23.9396	15.1777	43.3105	89.5301	144.773	224.773	328.196
147.95	-157.13	-122.368	-86.31	-50.4703	-21.9779	10.2114	49.397	80.8208	149.491	228.901	328.91
148	-159.064	-122.948	-86.1999	-52.1395	-20.7733	3.99941	50.6979	75.7054	151.152	231.68	329.178
148.05	-165.82	-125.196	-85.678	-53.7159	-21.1498	-1.74956	47.4867	75.5104	149.095	232.953	329.937
148.1	-172.89	-125.756	-84.5901	-52.2533	-21.6243	-3.7981	45.5694	78.7488	147.553	235.149	330.868
148.15	-175.108	-123.498	-83.4137	-49.4193	-21.7005	-1.02303	43.9743	84.4016	148.918	237.815	330.291
148.2	-171.741	-120.683	-82.5466	-47.9771	-21.4808	2.8447	39.9288	91.5028	150.163	238.443	328.393
148.25	-165.926	-119.039	-81.7435	-48.1578	-20.6067	3.60695	36.428	95.3091	148.664	236.399	327.468
148.3	-161.796	-117.501	-81.3178	-48.5046	-18.9882	1.97306	37.1282	92.3617	146.194	232.468	327.445
148.35	-162.133	-115.52	-81.974	-47.7926	-17.1468	0.372316	41.1416	86.2171	145.958	228.026	325.844
148.4	-165.808	-114.733	-84.04	-45.6106	-15.7228	-0.711465	45.7095	82.8039	148.402	224.759	321.524
148.45	-168.312	-116.049	-85.9826	-44.5841	-15.7014	0.611057	48.6994	84.1347	152.338	223.903	316.991
148.5	-166.89	-118.416	-86.3031	-48.6334	-17.812	5.99405	48.0147	89.5467	154.849	224.819	316.286
148.55	-163.55	-120.519	-87.0439	-56.0064	-21.004	11.4907	44.1847	95.7629	152.931	225.372	318.62
148.6	-162.207	-123.391	-90.3317	-60.5305	-22.5506	12.8037	41.8617	97.5218	148.478	226.335	320.971
148.65	-164.513	-127.802	-94.2363	-60.2971	-21.264	11.0224	43.3762	93.2597	145.663	228.633	322.569
148.7	-168.993	-130.086	-95.2965	-57.6194	-18.9489	8.82616	45.6543	87.6596	143.603	231.069	321.804
148.75	-173.712	-128.158	-92.3903	-54.3	-18.29	7.44541	45.1951	86.1529	141.333	233.383	317.701
148.8	-176.802	-126.047	-86.8971	-52.9916	-19.2641	7.83228	42.465	89.1933	142.016	234.31	312.927
148.85	-176.197	-126.178	-81.0883	-55.9234	-19.3428	9.42534	41.3287	92.8716	146.74	231.866	309.013
148.9	-171.238	-125.267	-77.0072	-59.8743	-17.7883	10.3963	43.7468	94.0994	150.494	229.004	306.504
148.95	-163.172	-122.492	-76.119	-60.0503	-17.3285	10.2672	46.0796	93.4756	148.429	230.117	307.089
149	-154.774	-123.488	-78.0387	-56.769	-19.917	10.5836	43.8751	93.2516	143.403	232.182	311.701
149.05	-152.348	-130.303	-80.1233	-53.0782	-23.7868	12.2017	38.2923	94.8358	142.081	230.1	317.937
149.1	-160.569	-135.895	-80.8454	-50.6742	-26.3175	14.1279	34.1805	96.3448	145.653	226.207	321.818
149.15	-173.493	-133.816	-80.8213	-50.8952	-27.5524	15.3683	33.4059	93.6398	149.014	225.015	321.688
149.2	-180.851	-125.678	-80.4104	-53.4701	-29.3174	15.1266	31.8271	85.88	148.507	225.035	317.415
149.25	-180.519	-118.139	-80.131	-54.9312	-31.4373	13.0913	20.4266	78.1008	145.831	222.995	310.376
149.3	-177.635	-116.704	-80.8204	-54.554	-31.2763	10.7205	-0.833806	76.1155	144.499	219.853	307.684
149.35	-176.66	-122.746	-82.8806	-54.2952	-27.2635	8.78731	-12.7963	80.1483	145.797	220.006	312.841
149.4	-178.269	-132.79	-86.5863	-53.8919	-21.9211	6.05685	-1.34916	85.2939	148.689	225.496	318.523
149.45	-180.55	-139.55	-88.6835	-52.8888	-19.0983	3.13595	19.3453	87.1066	150.83	231.303	319.098
149.5	-182.153	-138.564	-85.083	-52.6263	-18.5933	2.58159	31.5567	86.2417	149.263	232.276	317.604
149.55	-182.76	-132.613	-79.7774	-53.0069	-18.2397	4.76714	34.4105	85.0455	144.454	231.262	317.35
149.6	-180.864	-127.861	-80.8589	-52.36	-18.2379	6.93437	34.5214	83.28	141.745	232.043	317.98
149.65	-177.622	-127.205	-87.7246	-49.8225	-19.3039	6.38571	37.2147	81.4803	144.594	231.729	319.288
149.7	-177.014	-127.51	-92.5248	-44.776	-21.0642	4.82145	41.0086	82.6181	149.083	227.037	321.638
149.75	-179.193	-125.928	-92.7901	-38.4494	-23.0598	5.67876	39.3134	87.2168	149.819	220.084	324.062
149.8	-180.86	-124.305	-92.4933	-36.3612	-24.1334	8.4755	34.8281	91.9034	147.288	214.718	324.702
149.85	-180.3	-123.578	-93.5357	-43.1027	-21.4979	10.791	36.878	93.0079	145.274	212.437	324.177
149.9	-178.326	-122.666	-94.42	-54.1847	-14.9529	12.5172	43.368	90.2024	145.173	212.77	324.364
149.95	-175.839	-123.131	-94.3199	-61.6421	-8.12208	13.3337	46.288	86.3711	146.7	214.976	324.754
150	-173.446	-126.326	-93.9854	-63.7962	-3.17378	11.7459	45.1971	83.8183	148.914	217.639	324.576
150.05	-172.998	-130.018	-94.8615	-63.6513	-2.48065	9.12204	43.6562	82.1592	150.71	219.064	324.16
150.1	-175.43	-131.776	-95.9404	-62.8581	-9.37291	8.25632	43.4317	81.4428	152.235	219.764	323.555
150.15	-178.456	-132.389	-94.9034	-62.2859	-20.7457	8.62756	44.8714	83.173	153.179	220.896	324.371
150.2	-179.566	-133.823	-91.9465	-61.9399	-29.2301	9.03042	48.682	86.4916	152.253	222.308	327.721
150.25	-178.302	-135.286	-87.6416	-60.6549	-32.4283	11.3833	60.0422	88.9476	149.489	224.322	331.738
150.3	-175.448	-134.561	-82.3204	-58.9117	-32.4779	16.6862	80.1428	90.7178	146.814	226.497	333.27
150.35	-172.775	-132.74	-79.6373	-57.3005	-30.2468	19.9584	93.2804	91.8664	145.449	226.546	329.703
150.4	-172.248	-132.675	-82.3668	-54.4366	-26.9146	14.8766	85.6613	89.5328	144.315	224.187	322.432
150.45	-173.744	-134.169	-87.5159	-51.595	-25.1218	4.08705	68.5457	83.8904	142.754	221.185	317.644
150.5	-175.045	-134.113	-90.5621	-51.7358	-24.2443	-3.38384	58.7568	80.0233	143.009	217.714	318.781
150.55	-174.784	-131.539	-91.2975	-53.5406	-23.3747	-4.25848	59.0027	80.8865	147.177	214.126	323.307
150.6	-174.147	-129.015	-91.7395	-54.135	-24.3529	-0.943756	63.6874	83.0916	153.781	214.486	327.401
150.65	-174.11	-128.075	-90.8747	-53.9891	-25.9345	2.39682	64.3527	84.0007	158.865	220.666	329.398
150.7	-174.574	-128.541	-87.8991	-56.0696	-24.7491	0.866571	55.0059	86.5101	159.592	227.591	329.304
150.75	-176.128	-129.828	-86.6423	-61.4803	-21.9197	-4.50854	40.1623	91.7498	156.617	229.422	327.241
150.8	-179.957	-129.988	-89.7153	-66.6173	-20.8045	-6.67009	30.1129	97.2395	153.362	226.555	324.858
150.85	-185.7	-128.934	-93.5806	-67.8944	-22.0398	-2.78485	29.396	102.422	152.291	223.175	324.65
150.9	-189.556	-129.896	-94.2394	-66.5391	-24.0594	3.28765	34.8703	104.496	153.35	221.07	326.949
150.95	-185.44	-133.276	-92.4768	-64.6615	-25.6003	7.3135	40.0519	97.838	155.776	218.974	329.963
151	-173.705	-136.549	-90.9451	-62.0969	-27.4613	8.15245	40.4627	84.5479	157.769	218.176	332.202
151.05	-164.048	-140.175	-90.5011	-59.818	-30.8293	6.96724	37.5612	74.4979	158.239	220.934	332.889
151.1	-163.32	-145.848	-91.4372	-60.0554	-34.2041	4.95768	35.1245	71.6798	160.395	225.37	332.666
151.15	-167.919	-149.966	-93.8642	-61.9613	-35.1688	2.53438	34.3569	72.3505	165.226	226.638	334.002
151.2	-173.364	-145.316	-95.9318	-62.4992	-34.0944	0.87169	35.0361	73.7147	165.789	222.167	336.987
151.25	-179.095	-131.822	-95.8491	-60.7587	-32.2299	1.05569	35.903	75.2455	157.469	214.849	339.043
151.3	-183.34	-120.027	-95.6468	-57.5543	-29.3477	2.779	36.2401	76.9419	146.972	210.212	339.385
151.35	-183.978	-117.919	-98.5459	-54.3831	-26.3133	5.30587	37.5065	79.6049	142.585	211.426	339.754
151.4	-181.886	-122.078	-102.215	-53.0338	-25.3561	7.81351	39.7508	82.5397	143.438	218.105	340.593
151.45	-177.742	-126.01	-100.705	-53.8628	-26.6823	9.07233	41.0273	84.2121	144.769	224.855	340.662
151.5	-170.842	-128.24	-93.3842	-56.0972	-29.1115	9.07201	40.9669	85.4965	144.954	225.133	338.828
151.55	-164.648	-129.798	-85.5492	-59.2049	-31.024	8.15931	39.9805	87.2691	144.555	219.589	334.751
151.6	-165.077	-130.506	-82.0232	-63.7023	-30.0579	5.86752	38.8336	87.4968	144.446	214.732	330.845
151.65	-172.822	-129.607	-83.0526	-68.9026	-26.22	3.62913	38.6874	84.4974	144.533	213.855	332.376
151.7	-181.556	-128.42	-85.6206	-69.8579	-23.2088	3.75421	38.5766	81.0649	143.199	214.357	338.992
151.75	-183.806	-128.976	-87.7271	-62.5554	-23.1972	4.94738	37.4123	82.1359	141.867	213.552	341.841
151.8	-178.178	-131.155	-88.2809	-52.2604	-25.3865	4.77316	36.9385	87.0182	143.66	212.26	335.138
151.85	-170.249	-132.694	-86.8544	-48.1448	-29.8822	3.59144	38.1304	89.7736	146	212.762	324.376
151.9	-167.081	-132.766	-86.2885	-51.6741	-36.4915	3.10488	39.4941	88.3169	144.536	214.831	317.26
151.95	-170.885	-132.954	-87.9238	-56.8846	-41.8042	3.74516	39.8847	85.9167	139.539	214.853	315.156
152	-177.192	-132.172	-89.3072	-59.1537	-41.3748	4.23529	39.6329	84.4049	134.93	211.541	317.062
152.05	-180.179	-127.985	-90.5531	-59.1168	-34.3806	3.18493	39.3034	82.5242	134.931	209.289	321.374
152.1	-176.88	-124.368	-93.6248	-59.2586	-25.5624	0.432633	39.1822	80.1268	138.792	211.597	324.535
152.15	-168.658	-127.731	-97.1929	-59.3399	-20.8045	-3.80264	39.2898	79.0043	141.027	216.721	324.478
152.2	-161.615	-136.104	-98.5767	-56.4412	-20.9941	-7.73221	38.7894	78.808	139.937	219.887	322.336
152.25	-160.903	-141.773	-96.0845	-50.4941	-23.5232	-5.92939	36.8175	77.9385	137.675	217.758	320.161
152.3	-164.791	-141.67	-91.0968	-46.0878	-26.3632	5.68865	34.5136	77.1454	135.696	212.676	319.691
152.35	-168.898	-137.609	-89.2989	-46.4232	-28.5263	21.7496	33.3129	77.257	135.556	208.976	320.772
152.4	-171.725	-131.577	-93.2459	-49.937	-29.8377	30.3182	31.328	77.9799	137.795	206.997	321.709
152.45	-172.74	-126.208	-97.539	-53.2734	-29.6375	27.5289	26.6251	80.0893	141.201	206.356	321.538
152.5	-171.697	-124.852	-97.627	-53.7223	-25.9421	20.4357	24.2945	83.7499	144.412	209.085	320.772
152.55	-170.916	-126.712	-96.4194	-52.4553	-19.9616	14.7796	31.1743	86.8764	146.861	215.312	321.151
152.6	-172.168	-127.677	-96.7681	-53.8152	-17.6219	10.1468	43.0754	88.0119	147.923	221.468	322.612
152.65	-173.258	-127.92	-96.381	-57.5332	-21.8429	5.05454	49.9064	86.5936	147.388	224.18	323.053
152.7	-172.012	-128.919	-94.0646	-58.1374	-29.5936	0.589544	50.9086	81.5902	147.026	223.061	322.784
152.75	-170.679	-128.773	-92.1856	-54.9494	-36.0813	-0.248186	52.0313	74.2127	147.307	219.909	322.969
152.8	-171.297	-127.895	-91.4057	-51.767	-37.1863	3.33733	52.9423	70.1599	145.931	217.003	323.27
152.85	-171.495	-129.13	-91.1387	-49.7158	-32.3119	7.32903	49.8031	73.972	142.8	216.155	324.441
152.9	-168.97	-132.537	-92.0831	-48.483	-24.7404	7.36881	44.3399	81.9117	140.357	217.907	327.096
152.95	-165.732	-137.098	-93.1065	-50.1774	-18.6007	3.94271	40.5854	85.97	138.842	221.123	329.895
153	-164.463	-141.203	-92.0435	-56.2678	-17.5009	1.36792	39.4244	84.5296	136.152	224.544	331.875
153.05	-164.303	-140.959	-90.8374	-63.1509	-21.5386	2.15777	40.2498	81.836	133.058	226.714	331.877
153.1	-164.158	-136.267	-92.186	-65.5923	-27.1229	3.38704	41.7074	80.2289	135.083	225.317	330.085
153.15	-165.023	-131.035	-93.9338	-64.1405	-30.6095	1.68832	42.7553	79.166	145.004	220.6	329.333
153.2	-167.33	-127.359	-93.1749	-62.8352	-29.1739	-0.600718	44.3611	77.6166	156.438	215.994	329.23
153.25	-169.133	-126.044	-90.0209	-62.2853	-23.0385	-0.123215	46.0223	75.781	161.918	212.477	326.351
153.3	-169.111	-128.595	-87.137	-60.2645	-17.6234	2.35249	46.3953	76.194	162.243	207.464	321.772
153.35	-169.478	-133.155	-86.773	-56.7853	-18.0685	3.8713	46.6507	80.7875	160.892	201.634	319.179
153.4	-172.247	-136.317	-87.0554	-54.092	-23.8872	3.81699	47.4256	86.7434	157.739	200.896	319.44
153.45	-174.728	-138.005	-85.4826	-53.4191	-30.7807	4.04941	47.1662	89.2189	152.381	207.031	320.822
153.5	-173.28	-138.405	-84.1445	-54.2243	-34.606	4.80984	44.8779	87.0867	147.084	213.093	318.699
153.55	-167.744	-136.535	-85.8522	-54.8585	-33.4952	4.13146	40.5542	82.3208	145.064	213.688	310.123
153.6	-161.854	-134.141	-89.2605	-54.2361	-29.5168	2.96148	36.1878	77.7755	147.709	211.97	301.5
153.65	-160.05	-133.582	-91.1549	-54.1186	-25.5467	4.09632	36.1934	76.4653	152.51	211.758	303.146
153.7	-161.914	-132.887	-90.7253	-56.7992	-23.3648	5.85859	40.9966	79.1198	154.158	212.922	315.161
153.75	-164.072	-129.776	-90.6679	-61.0507	-24.4953	4.88368	45.3475	83.8133	150.191	214.227	325.697
153.8	-166.02	-125.523	-92.7585	-64.2088	-28.7525	1.77832	45.8518	88.7735	144.131	214.118	325.94
153.85	-167.878	-123.236	-93.9744	-66.0415	-32.67	-1.58802	43.5937	90.5549	140.784	212.816	320.415
153.9	-168.997	-123.875	-91.9411	-67.4944	-33.0125	-3.04649	41.2293	86.4881	141.762	212.688	316.197
153.95	-171.133	-125.214	-90.1924	-67.6748	-30.2184	-0.665557	40.4892	80.0721	144.611	213.68	314.187
154	-174.979	-125.864	-91.4555	-64.7779	-26.7096	4.07254	40.1531	76.1425	144.976	213.886	313.571
154.05	-177.004	-127.118	-92.9456	-60.3698	-24.3525	7.70844	38.3908	75.3043	142.404	214.158	312.744
154.1	-175.841	-130.16	-91.9137	-57.8216	-24.2735	7.71414	36.4811	76.4934	141.893	214.759	310.539
154.15	-174.191	-133.041	-89.5723	-56.4342	-26.3975	3.25125	36.5985	79.0518	145.404	214.867	309.338
154.2	-173.472	-132.613	-87.681	-53.6411	-28.1948	-2.49314	38.4872	81.207	147.953	214.671	309.85
154.25	-172.477	-130.003	-86.2887	-50.9437	-28.0033	-4.36147	39.3506	81.0928	145.988	214.221	309.129
154.3	-171.326	-128.905	-85.793	-52.0767	-27.6676	-0.977215	38.3315	80.88	142.552	213.813	306.441
154.35	-171.208	-130.117	-87.578	-57.031	-28.5577	5.7248	38.1556	83.1696	141.436	213.919	303.594
154.4	-171.262	-131.673	-91.6786	-62.6818	-29.1829	10.8143	40.2053	83.8581	142.418	212.597	302.654
154.45	-170.117	-133.159	-96.9125	-67.1971	-29.3267	9.90634	41.8299	79.1594	143.466	210.133	305.664
154.5	-167.461	-134.546	-100.989	-69.7095	-30.1513	5.47926	40.3173	74.6715	143.684	210.834	311.883
154.55	-164.305	-134.691	-99.6394	-69.2364	-31.7013	2.00662	37.4707	76.1802	142.435	215.809	316.18
154.6	-162.648	-134.408	-92.5632	-66.121	-32.4763	1.50322	37.3297	80.5166	141.132	220.757	314.676
154.65	-163.114	-134.719	-85.5885	-61.9417	-30.8104	4.69239	39.7025	82.3725	142.042	222.127	310.035
154.7	-164.095	-134.805	-81.7772	-57.7435	-26.7943	9.3399	40.8892	81.6687	143.452	220.261	307.585
154.75	-163.977	-134.26	-80.8768	-53.7797	-22.3936	11.8237	39.581	80.2785	142.883	217.171	307.985
154.8	-162.265	-132.897	-83.6277	-50.8324	-19.832	11.3442	37.2628	78.1941	141.904	214.069	309.955
154.85	-160.174	-131.661	-88.2739	-50.2312	-20.4669	9.62228	35.2231	75.0702	142.672	212.163	314.878
154.9	-159.839	-132.765	-90.4785	-52.212	-23.5682	10.0827	33.4559	72.9449	144.77	212.337	320.557
154.95	-160.937	-136.216	-90.556	-55.4098	-26.3421	13.0076	31.2236	74.5849	145.585	214.274	321.324
155	-161.351	-139.848	-91.4666	-57.6827	-27.34	13.669	28.5753	78.1343	143.801	216.411	317.819
155.05	-161.083	-140.294	-92.1735	-58.6735	-27.4482	9.89974	27.6941	79.1019	141.957	217.324	314.925
155.1	-162.624	-136	-91.4298	-59.0325	-27.5383	4.8932	29.5261	77.587	141.712	217.372	312.63
155.15	-167.565	-130.516	-91.615	-56.9672	-27.0881	1.37497	32.1107	76.5666	140.975	217.855	309.252
155.2	-172.663	-126.547	-93.427	-52.1561	-25.6355	-0.298365	34.5433	75.4839	138.406	218.685	307.553
155.25	-174.103	-123.732	-94.3209	-48.3316	-24.6443	0.442651	37.4501	73.2379	136.411	219.096	309.691
155.3	-174.357	-123.001	-92.4168	-47.4629	-25.2791	2.87956	40.6085	71.7868	137.267	219.336	312.838
155.35	-176.714	-125.704	-89.3245	-48.8207	-25.6312	4.42771	42.3157	73.4111	139.881	220.584	312.911
155.4	-180.446	-132.023	-88.216	-52.3397	-24.4141	4.00703	42.1695	76.5188	141.608	222.288	309.259
155.45	-182.878	-138.76	-89.5791	-56.0318	-22.6747	2.93876	41.3777	76.812	141.149	222.06	304.97
155.5	-181.003	-139.462	-91.4265	-58.8424	-21.7706	3.19452	40.4448	73.8033	139.912	219.009	303.599
155.55	-176.194	-132.894	-91.6497	-62.6193	-23.1409	5.51521	39.4265	72.7767	139.758	215.039	306.029
155.6	-173.242	-126.592	-89.0716	-66.0401	-25.9411	8.6074	37.4517	77.2342	139.992	212.837	311.602
155.65	-171.095	-124.474	-85.9558	-65.869	-28.2681	9.64611	34.2856	83.5943	138.758	213.199	318.69
155.7	-168.875	-123.542	-85.0938	-61.8911	-28.7217	7.82827	32.0936	86.6033	135.832	213.88	324.032
155.75	-171.556	-122.373	-85.0713	-56.317	-25.5609	5.82145	32.453	85.6384	133.596	212.742	325.074
155.8	-177.243	-121.57	-83.9759	-53.8538	-20.4061	5.63502	34.1579	83.2846	134.481	211.011	322.296
155.85	-179.341	-122.916	-83.1051	-57.0217	-16.992	5.88373	35.4092	82	136.593	210.025	317.621
155.9	-178.272	-127.924	-83.7382	-62.3841	-17.1605	3.24074	37.2559	82.379	138.058	209.733	313.437
155.95	-176.075	-133.081	-85.788	-67.7068	-21.036	-1.48101	40.9456	82.9469	141.042	211.492	311.722
156	-171.376	-136.77	-89.0516	-72.2553	-24.1886	-2.12007	44.0439	82.2444	145.643	216.05	312.336
156.05	-166.16	-141.438	-91.5429	-74.5338	-22.7264	1.91251	43.2249	79.2942	148.775	219.703	315.408
156.1	-164.134	-142.982	-91.0979	-74.4221	-20.8133	4.71194	37.99	72.5135	148.35	218.515	321.024
156.15	-165.104	-136.896	-89.2184	-71.8058	-22.1413	5.2397	32.3498	65.3224	143.505	215.76	325.569
156.2	-167.865	-127.997	-89.4139	-66.969	-23.9319	5.68296	30.9331	64.5435	136.862	216.277	324.887
156.25	-168.991	-121.969	-92.4275	-61.8239	-21.8419	5.51093	33.2938	69.0815	133.901	218.03	320.802
156.3	-165.314	-120.969	-95.2328	-57.8404	-16.9836	6.07489	36.0458	72.8819	135.437	217.964	317.939
156.35	-161.496	-124.629	-96.3889	-56.88	-14.8618	8.10742	36.6853	74.8646	138.079	216.767	317.762
156.4	-163.941	-128.207	-98.546	-58.3435	-16.3586	7.29558	36.5397	76.9546	140.011	215.798	319.009
156.45	-169.518	-128.848	-100.989	-58.9899	-18.4903	1.70781	39.0282	80.2063	142.026	215.119	320.244
156.5	-171.97	-128.822	-98.8811	-58.8551	-20.0632	-4.51321	41.0496	83.6921	144.197	215.035	321.766
156.55	-169.913	-131.629	-92.9523	-59.2491	-20.7853	-8.12055	37.4607	84.0593	144.813	216.615	324.1
156.6	-166.039	-136.833	-89.5581	-61.0207	-21.704	-9.27016	32.4454	80.919	143.07	219.353	325.334
156.65	-164.468	-138.514	-89.3171	-67.4531	-23.7284	-7.81662	32.5856	78.936	139.441	221.464	324.433
156.7	-166.098	-134.414	-88.4379	-76.3129	-25.1353	-4.29388	37.4619	80.6826	136.243	222.386	324.729
156.75	-167.54	-130.02	-87.5537	-76.3294	-24.9193	-1.37273	41.5702	83.334	136.401	222.746	327.869
156.8	-167.172	-129.6	-91.257	-66.2588	-23.9508	0.31299	40.941	84.175	138.084	223.04	330.884
156.85	-168.328	-132.26	-98.8631	-58.8845	-24.6227	5.24193	38.5195	83.1758	138.755	222.44	331.247
156.9	-172.881	-136.059	-102.155	-58.1693	-30.4339	13.2386	39.233	80.4879	141.55	219.152	328.495
156.95	-177.009	-139.284	-98.313	-58.8874	-38.2502	15.4257	43.5452	77.8446	147.514	214.367	323.433
157	-176.242	-140.247	-94.4323	-59.7964	-38.4398	10.3208	46.7077	78.2441	149.952	213.5	318.087
157.05	-171.714	-137.75	-93.2823	-61.4759	-32.8481	5.70683	43.6131	80.4631	145.28	219.215	315.117
157.1	-169.275	-133.282	-91.3228	-62.16	-32.799	3.37226	37.3417	82.4317	139.259	227.778	316.216
157.15	-171.728	-130.402	-87.1682	-60.0722	-37.0023	0.493182	34.5465	86.4218	138.346	233.293	319.626
157.2	-175.188	-130.123	-83.9934	-54.9634	-37.6952	-3.02273	35.3545	92.1448	141.648	233.684	321.925
157.25	-176.102	-130.738	-85.5759	-50.196	-35.4661	-4.36262	37.2432	96.0445	144.79	231.295	321.642
157.3	-175.759	-131.738	-90.9758	-50.1848	-33.9041	-0.437379	38.0433	98.1153	146.311	229.11	320.521
157.35	-175.562	-133.919	-96.3853	-54.1372	-35.9212	6.22476	36.381	98.7065	147.214	227.244	321.55
157.4	-174.584	-137.792	-99.2311	-57.4086	-39.4686	10.6219	34.6216	96.1261	147.715	223.516	324.194
157.45	-173.192	-141.983	-98.6163	-58.2544	-36.9607	13.8883	34.28	92.8365	148.933	218.738	326.511
157.5	-173.503	-143.762	-96.9552	-58.4765	-29.2841	15.7261	34.5574	91.9688	151.51	217.53	329.278
157.55	-174.789	-141.958	-97.4236	-60.2971	-26.5214	11.3664	38.0356	89.3272	152.289	220.571	333.397
157.6	-174.215	-136.714	-98.5559	-64.0996	-29.8748	1.25186	44.524	82.2875	148.622	224.623	338.867
157.65	-171.446	-130.13	-98.1391	-66.9307	-32.646	-7.14517	46.8452	76.4243	142.404	228.617	345.08
157.7	-168.368	-126.629	-97.8886	-65.7123	-31.5563	-8.23431	43.2922	73.6746	137.878	230.386	348.869
157.75	-167.456	-127.184	-99.2614	-61.6569	-27.985	-3.82906	41.2372	70.4759	137.952	226.314	346.796
157.8	-170.243	-127.16	-100.208	-58.4469	-25.0264	0.85123	43.3259	70.9166	139.814	219.806	337.914
157.85	-174.037	-124.298	-98.4169	-56.587	-24.747	3.16269	44.9658	79.6615	139.042	216.789	326.066
157.9	-175.42	-122.232	-93.9334	-54.565	-27.1213	2.52187	41.9754	88.5105	137.553	218.808	319.269
157.95	-175.113	-124.573	-89.1739	-53.2805	-30.5026	-0.244381	37.2326	88.9523	138.831	223.257	319.094
158	-174.689	-129.768	-87.8822	-53.7487	-32.7891	-2.62239	39.0464	85.895	141.213	225.465	320.078
158.05	-173.503	-132.912	-90.714	-54.5611	-32.3337	-2.44958	47.119	86.2775	140.999	224.186	321.151
158.1	-171.738	-131.662	-93.2386	-54.5182	-28.8151	0.693099	49.5005	90.5302	138.005	223.053	323.638
158.15	-170.518	-129.341	-91.7638	-54.9349	-24.0764	5.38619	42.6278	95.6592	136.43	223.823	325.375
158.2	-169.946	-130.006	-89.0307	-56.6083	-21.1465	9.20803	35.6723	96.3601	138.71	224.247	324.336
158.25	-170.243	-132.786	-89.4762	-58.0316	-20.7279	9.75317	34.6206	90.8871	142.001	220.944	322.255
158.3	-171.277	-134.27	-92.6818	-58.6513	-20.9806	7.08812	36.6904	85.8313	144.592	213.186	321.087
158.35	-170.983	-132.596	-95.2207	-59.0961	-20.8721	5.68076	37.6495	86.6255	145.63	208.267	320.532
158.4	-168.412	-129.419	-96.4865	-58.6156	-20.8767	8.68392	36.7001	89.6343	143.652	214.06	321.88
158.45	-166.332	-128.12	-97.9992	-56.8562	-21.8513	11.6373	35.3668	90.7314	140.446	224.613	326.153
158.5	-167.579	-129.705	-99.7985	-55.9627	-24.1823	8.70291	34.679	90.366	140.991	227.473	329.581
158.55	-170.341	-132.834	-99.2702	-57.4521	-27.0345	2.44056	34.0152	89.0527	147.042	223.399	329.529
158.6	-171.111	-135.364	-95.0201	-59.7228	-28.6678	0.267323	33.0122	85.9718	153.101	220.525	328.861
158.65	-170.016	-134.828	-90.3837	-61.8161	-29.041	5.47689	32.8368	81.6639	153.155	221.433	329.611
158.7	-169.415	-132.599	-89.2123	-63.6118	-29.4022	14.0961	34.5118	78.3884	149.902	224.383	330.935
158.75	-170.1	-132.006	-91.6675	-63.3242	-28.4973	18.354	37.1849	77.9887	148.224	225.511	331.552
158.8	-171.987	-131.171	-95.8216	-60.8102	-25.7537	14.1762	38.249	79.28	147.893	223.693	330.335
158.85	-174.014	-127.756	-98.9614	-58.8351	-25.145	6.13081	37.5232	79.1877	145.528	222.864	329.093
158.9	-174.261	-125.192	-98.5588	-59.1258	-28.3416	2.38548	38.3102	77.7702	140.045	223.935	329.84
158.95	-174.405	-126.289	-95.355	-61.5393	-30.9297	5.48798	41.6004	78.5302	135.135	223.848	330.559
159	-177.928	-129.126	-93.1223	-64.2608	-29.6685	11.2339	43.4984	81.9955	134.898	223.632	327.361
159.05	-181.308	-131.014	-94.4254	-65.4322	-26.2919	14.4699	41.0208	84.43	139.041	225.119	322.574
159.1	-177.646	-131.903	-98.2108	-65.4667	-23.4416	13.8214	36.0076	83.3062	144.228	226.834	322.525
159.15	-169.766	-133.02	-101.042	-64.2164	-22.0869	10.9476	32.654	81.0771	147.962	226.751	325.353
159.2	-165.033	-134.644	-100.401	-60.2064	-21.6274	6.74072	33.5559	81.5411	149.698	224.303	324.62
159.25	-163.324	-135.999	-96.4106	-56.3758	-21.7626	2.40131	37.4967	83.5901	149.24	221.029	321.829
159.3	-162.199	-135.679	-91.0537	-56.6632	-23.7901	-0.0899913	40.7075	84.2453	146.622	219.216	320.699
159.35	-162.805	-132.269	-88.4961	-59.9061	-27.7891	0.0587458	41.0655	83.7606	143.766	218.319	319.879
159.4	-165.27	-127.48	-92.1094	-63.3626	-31.3216	2.89871	39.1829	83.4345	143.694	215.966	317.601
159.45	-167.238	-124.488	-100.667	-66.0069	-32.8404	7.49511	36.9048	82.7388	146.379	213.326	316.652
159.5	-167.604	-122.736	-110.72	-66.2201	-32.9902	11.1478	35.4969	81.6512	148.727	214.454	319.469
159.55	-167.578	-119.845	-116.626	-63.688	-33.2566	11.2178	33.9793	82.0551	149.076	218.132	322.867
159.6	-167.831	-116.554	-110.769	-62.2569	-34.3626	7.25567	32.2595	84.9914	148.415	219.057	323.395
159.65	-167.867	-115.2	-94.6781	-64.396	-34.9138	2.90707	33.0213	88.5843	147.804	217.663	322.112
159.7	-166.949	-116.231	-81.1385	-68.1529	-32.8638	2.59407	37.9534	89.9438	146.99	218.158	319.766
159.75	-163.73	-118.779	-78.0163	-72.501	-28.6425	4.69262	43.5178	87.1191	145.599	218.672	315.997
159.8	-159.757	-121.63	-81.4694	-75.0159	-25.185	5.14452	43.6586	81.3499	143.658	215.401	313.078
159.85	-159.829	-123.621	-85.1636	-69.339	-25.0184	4.80782	38.2046	76.1971	141.618	210.537	313.643
159.9	-164.38	-124.986	-86.4195	-57.4195	-27.9096	6.01888	33.1864	73.7055	140.848	208.764	316.73
159.95	-169.193	-126.995	-85.4722	-50.4902	-31.8008	6.86344	33.7506	74.4741	142.595	210.57	320.001
160	-170.89	-128.865	-85.4588	-52.461	-35.4609	4.9151	38.5015	78.5425	145.672	211.85	322.005
160.05	-169.224	-128.43	-89.02	-57.0448	-37.2888	1.95218	41.3237	82.4307	146.397	209.973	322.408
160.1	-167.261	-126.878	-92.9156	-58.8326	-34.4293	1.23172	39.3449	82.6503	142.592	207.746	323.259
160.15	-167.437	-126.334	-92.6499	-57.034	-26.3748	2.404	36.4593	80.4267	137.685	208.31	326.198
160.2	-167.842	-126.329	-90.1633	-53.5833	-17.2675	2.99092	36.4029	78.001	137.543	211.199	329.05
160.25	-166.591	-126.796	-88.9707	-52.0243	-12.4141	0.235315	39.0742	76.2254	143.284	214.026	328.836
160.3	-164.655	-128.012	-88.228	-53.6048	-13.8124	-7.32777	42.9352	76.9045	149.219	215.01	326.007
160.35	-162.878	-127.832	-87.2286	-54.7873	-18.4751	-13.8697	45.7868	80.3414	149.934	212.937	322.99
160.4	-161.669	-124.407	-86.9399	-53.2425	-22.2729	-9.56359	45.7781	83.4936	146.304	207.986	320.449
160.45	-162.361	-119.036	-86.9177	-52.9311	-23.9814	3.6615	43.5384	83.7597	141.826	204.855	317.009
160.5	-164.541	-115.513	-87.3283	-56.0772	-24.14	13.6215	40.1542	81.1434	138.734	207.974	312.505
160.55	-165.907	-115.694	-88.9379	-59.2715	-24.4468	15.7737	34.777	77.993	137.484	213.72	310.461
160.6	-166.1	-117.351	-90.7407	-60.9569	-25.6444	15.5782	27.8742	77.6662	137.209	215.129	314.413
160.65	-167.037	-119.375	-91.6362	-61.5216	-26.0173	17.0416	24.3936	81.2228	137.618	210.601	322.836
160.7	-168.745	-123.231	-91.9896	-59.2469	-25.6318	18.706	28.8288	86.6159	139.614	203.663	330.112
160.75	-168.847	-128.402	-92.6186	-53.642	-25.6564	18.3213	37.1201	90.7861	142.713	197.841	332.835
160.8	-164.882	-132.735	-92.6635	-48.1699	-24.5126	15.0175	42.3399	90.7529	144.703	196.004	333.361
160.85	-156.487	-135.036	-91.0515	-47.7928	-22.1337	9.34107	44.0205	85.2481	144.614	200.803	334.038
160.9	-149.932	-134.839	-89.2173	-52.9497	-21.3995	5.13387	43.7937	77.6092	143.499	209.999	331.132
160.95	-154.865	-132.015	-88.7321	-57.7434	-24.0305	5.17551	42.2417	75.0074	142.333	216.064	321.556
161	-170.208	-127.087	-89.0528	-57.83	-28.9571	6.03828	42.1437	80.8982	141.819	215.29	310.372
161.05	-182.601	-121.889	-89.8378	-55.4089	-32.3314	5.22583	45.1732	90.1441	142.782	211.847	305.499
161.1	-182.892	-117.775	-90.5855	-53.9265	-31.6744	4.94181	47.8643	95.7258	142.339	211.037	309.3
161.15	-174.892	-114.376	-90.1234	-54.2878	-29.5829	5.3554	47.0264	96.1141	135.948	212.815	315.569
161.2	-167.466	-113.057	-87.8796	-55.68	-29.292	4.27133	44.4341	94.1314	127.561	213.676	316.352
161.25	-163.936	-116.825	-84.3745	-56.7479	-29.2464	1.96278	42.1742	92.46	127.732	212.526	311.915
161.3	-162.532	-124.182	-81.3361	-56.909	-26.7429	0.619713	39.7581	90.6782	138.178	210.744	308.352
161.35	-162.227	-128.622	-78.1664	-56.6162	-22.657	1.78386	38.7026	86.9265	150.238	208.887	308.321
161.4	-163.588	-127.837	-74.0328	-56.1693	-19.4626	4.48626	41.3262	81.6964	156.585	205.592	310.844
161.45	-166.985	-125.84	-74.1912	-55.4627	-17.9993	6.3518	45.2667	78.84	156.604	201.837	315.677
161.5	-170.613	-125.061	-82.6568	-54.7504	-18.2562	7.46495	46.7218	81.55	153.259	202.992	322.033
161.55	-170.166	-124.809	-94.1047	-54.5997	-20.433	8.06183	44.4465	87.2979	149.362	209.416	327.7
161.6	-164.146	-125.077	-101.367	-53.8498	-23.6726	7.9367	40.0334	90.4992	146.025	213.832	332.258
161.65	-157.033	-126.618	-103.646	-50.7594	-26.2747	9.43134	38.1119	90.1579	144.084	213.76	333.071
161.7	-153.714	-129.201	-103.552	-46.6007	-27.4144	11.5789	40.5918	87.072	143.896	213.369	325.656
161.75	-155.473	-131.778	-101.089	-44.4288	-26.4128	9.79638	43.3808	82.029	144.683	215.09	315.66
161.8	-161.018	-132.132	-96.0214	-44.8312	-22.8845	6.07801	43.1609	80.4159	145.893	217.991	316.081
161.85	-165.748	-128.378	-91.1563	-46.3773	-17.0498	4.73577	41.088	84.706	147.022	221.301	327.545
161.9	-163.771	-122.798	-87.5188	-49.0045	-9.7545	3.69305	39.5833	88.6453	148.506	224.638	338.13
161.95	-156.024	-120.118	-84.2027	-52.7659	-5.00663	1.26555	38.88	88.434	150.041	226.018	340.214
162	-151.836	-121.113	-83.1279	-55.5815	-8.41297	1.05462	37.5652	87.5081	149.478	224.288	336.212
162.05	-155.876	-123.3	-85.391	-55.8541	-18.3105	5.18296	35.3196	89.113	147.465	221.334	331.069
162.1	-162.978	-125.025	-87.3731	-53.5137	-26.2209	10.9341	34.121	91.3814	145.573	218.406	328.402
162.15	-168.263	-125.035	-85.8792	-49.3109	-28.1052	15.8408	36.1303	90.7855	142.252	215.415	329.526
162.2	-170.409	-122.582	-81.7138	-45.9279	-27.4936	18.4358	41.5086	88.471	137.169	213.21	331.263
162.25	-168.63	-119.662	-78.8118	-46.9739	-27.3619	14.2462	47.6127	87.2466	133.705	212.091	329.693
162.3	-164.505	-118.287	-80.2444	-52.7948	-27.0781	0.9401	51.0547	85.7042	134.614	211.658	325.722
162.35	-161.55	-118.654	-83.8312	-58.9629	-26.4591	-12.7535	51.2936	82.6946	138.531	213.238	321.961
162.4	-160.434	-120.922	-85.6845	-61.3684	-25.6263	-14.8705	50.8061	80.739	141.317	217.122	318.845
162.45	-159.863	-122.666	-87.2237	-60.573	-24.8115	-6.7075	51.3439	80.9594	141.645	220.424	318.149
162.5	-160.789	-120.448	-90.8797	-59.3743	-26.5173	1.69758	51.087	81.6679	141.972	221.315	320.596
162.55	-162.864	-116.712	-94.523	-59.1933	-30.6868	7.56544	46.0018	82.606	143.195	220.267	322.451
162.6	-163.596	-117.708	-95.8476	-59.0862	-31.5144	13.2731	35.7437	85.3687	144.105	218.139	322.433
162.65	-162.816	-123.682	-95.1722	-57.4921	-26.137	18.1266	27.6813	89.1935	145.976	217.062	323.201
162.7	-162.438	-129.087	-92.9603	-55.0769	-18.0666	20.4575	28.5596	92.0657	149.975	218.147	325.192
162.75	-163.293	-131.978	-89.9764	-53.1053	-11.1991	19.105	35.1667	94.5112	152.047	220.269	327.102
162.8	-164.726	-134.151	-88.3587	-51.4996	-8.7408	12.4644	40.2002	96.2663	149.048	222.286	328.651
162.85	-165.551	-133.357	-89.1005	-51.1712	-12.6054	3.67082	41.6327	93.7345	144.996	223.288	329.574
162.9	-165.992	-127.726	-90.3603	-52.7875	-18.7715	0.288844	42.3674	87.568	145.076	223	329.351
162.95	-166.235	-121.479	-89.7278	-53.6363	-21.0485	4.26575	44.4618	84.9147	149.825	222.805	328.305
163	-165.049	-118.588	-86.7523	-52.4422	-20.2998	10.014	46.3997	87.5073	157.047	223.372	327.901
163.05	-163.318	-120.406	-82.7175	-52.4998	-21.1667	12.4153	45.6518	88.8264	162.689	222.612	329.639
163.1	-163.747	-125.484	-79.8244	-54.7879	-23.5262	10.5344	41.9999	85.9589	159.982	219.894	333.581
163.15	-165.765	-129.307	-80.0442	-56.0825	-25.0916	6.90223	38.6879	82.2855	146.63	219.017	337.811
163.2	-166.626	-129.816	-83.2164	-55.7584	-26.4488	5.15376	38.0819	79.3225	130.954	222.053	340.038
163.25	-166.636	-128.632	-87.8031	-54.5907	-28.2407	6.37523	38.9	76.4316	121.359	226.535	339.637
163.3	-168.278	-127.273	-92.1192	-52.2968	-28.0732	8.8122	40.0242	75.0183	117.442	230.931	337.83
163.35	-171.22	-125.626	-93.3655	-50.5237	-25.0798	10.6734	41.087	75.4154	118.957	233.319	336.309
163.4	-172.772	-123.536	-90.7651	-51.467	-23.239	9.73499	39.3731	76.1088	128.404	229.042	335.303
163.45	-172.099	-123.309	-86.8677	-53.8577	-25.5266	4.50818	33.1649	76.8452	142.323	219.372	335.117
163.5	-170.819	-127.105	-84.5971	-54.9685	-28.6541	-1.06693	26.9887	78.0972	153.038	213.828	337.612
163.55	-168.378	-130.986	-85.1804	-54.348	-27.8973	-1.84128	27.3755	80.7017	156.94	216.635	343.638
163.6	-163.884	-129.084	-88.0871	-53.9083	-23.5473	0.0753931	33.3525	83.8226	154.479	221.677	349.449
163.65	-161.564	-122.877	-91.7846	-54.5495	-20.3292	1.15026	37.768	84.1757	147.17	223.992	346.59
163.7	-165.121	-119.332	-93.7249	-55.5079	-20.7313	3.82712	37.4916	80.3906	139.139	224.14	330.939
163.75	-170.981	-121.214	-92.0548	-55.2966	-22.515	8.99318	35.667	75.6509	136.628	223.896	312.083
163.8	-174.192	-124.587	-89.1433	-52.8453	-23.785	11.8743	35.3501	74.5346	140.676	224.338	303.613
163.85	-174.732	-125.689	-88.7532	-49.1775	-25.1528	9.66826	36.0773	78.9705	145.726	225.229	305.825
163.9	-175.349	-124.408	-88.9666	-47.5974	-27.5317	5.36597	36.5654	85.6822	147.843	225.633	310.469
163.95	-176.754	-122.265	-85.7185	-50.4709	-30.9379	2.87194	37.3144	89.5413	148.275	225.557	314.782
164	-176.024	-120.956	-81.4549	-54.8236	-32.9758	2.87288	39.4456	88.8209	149.13	226.506	320.087
164.05	-172.219	-120.541	-81.0006	-55.957	-30.5958	3.40901	42.1307	85.2155	150.753	228.808	325.777
164.1	-169.544	-119.151	-84.3004	-54.4344	-25.5472	4.38781	43.0383	81.6556	152.15	230.747	328.895
164.15	-170.57	-117.286	-88.1681	-53.0624	-22.3586	7.95681	41.8671	81.1048	152.278	231.04	327.864
164.2	-172.146	-117.993	-90.8571	-51.9081	-22.1764	13.032	40.1978	84.0938	151.631	229.682	324.687
164.25	-171.477	-121.152	-92.3583	-51.2505	-23.3158	15.4233	38.7764	87.6595	151.179	227.219	322.934
164.3	-170.32	-123.783	-93.5784	-52.2347	-24.8612	13.8652	37.8376	89.2705	150.115	224.496	323.78
164.35	-170.268	-124.652	-95.1352	-53.2822	-26.3881	11.0494	37.1023	89.1636	148.491	222.228	326.706
164.4	-170.064	-123.474	-96.5233	-52.7301	-26.2052	10.2166	36.2747	89.2988	147.813	222.194	330.048
164.45	-168.353	-121.006	-97.4369	-52.0127	-23.7365	11.5937	36.894	90.9764	148.367	225.186	330.154
164.5	-165.721	-120.469	-98.8107	-52.5292	-21.8121	12.8656	39.8838	92.5027	149.459	228.691	325.259
164.55	-163.418	-122.698	-99.2716	-53.0696	-22.8525	13.4746	42.8992	92.6718	150.724	229.738	319.85
164.6	-163.743	-124.277	-95.8629	-52.5991	-25.5264	15.093	43.5449	92.3422	151.14	228.516	319.907
164.65	-167.681	-124.423	-89.5271	-52.2961	-26.7868	16.9864	42.1529	91.6321	149.314	227.043	324.126
164.7	-172.663	-125.545	-83.7658	-52.7211	-25.2377	16.1091	41.0151	90.1685	145.653	226.003	326.193
164.75	-175.802	-126.703	-81.1553	-53.5613	-23.259	11.9641	41.8725	89.187	143.39	226.047	325.606
164.8	-175.573	-125.878	-83.641	-55.6916	-23.3066	8.46903	43.0382	90.687	143.894	227.285	326.267
164.85	-172.245	-124.645	-89.9233	-58.0948	-23.0425	8.82926	41.7007	94.4256	144.401	227.576	327.232
164.9	-168.1	-124.545	-94.1946	-57.5289	-19.9586	11.7648	38.9689	96.9746	143.539	227.013	325.703
164.95	-163.468	-125.161	-93.2128	-54.0754	-17.4883	14.1555	37.0581	97.1652	144.613	227.984	322.756
165	-157.736	-125.614	-90.6235	-51.3623	-19.2916	14.0811	35.9636	96.5966	149.149	228.574	321.779
165.05	-153.154	-124.742	-90.476	-51.3023	-22.4923	12.3434	35.2265	96.2872	151.703	225.437	324.235
165.1	-150.016	-124.078	-92.7821	-51.3876	-22.7163	11.064	35.6699	96.5963	149.184	220.458	327.897
165.15	-147.308	-126.327	-94.8167	-49.6406	-20.3208	10.1607	39.0602	97.1147	147.892	216.95	329.63
165.2	-147.268	-128.55	-93.5347	-49.0651	-18.4052	8.81537	45.4836	96.814	152.334	215.341	328.527
165.25	-151.9	-127.277	-89.2925	-51.9035	-17.7396	9.19584	50.6802	94.981	157.074	215.137	327.284
165.3	-158.293	-124.714	-85.8493	-55.2659	-16.6633	12.4853	50.2542	91.8623	155.939	217.053	328.793
165.35	-161.542	-123.387	-85.1141	-57.6559	-14.4055	14.688	46.5712	88.3989	150.698	220.307	331.615
165.4	-161.925	-123.714	-85.891	-60.697	-12.5387	12.01	44.7968	86.9136	146.956	221.883	333.287
165.45	-164.33	-124.432	-87.0725	-64.7108	-13.084	6.95374	44.7623	89.6626	147.023	219.577	335.353
165.5	-168.845	-122.498	-87.4375	-66.4142	-15.5327	5.09296	43.6467	93.9814	149.274	214.603	339.151
165.55	-171.265	-117.148	-86.7259	-62.5842	-18.1746	6.61586	41.528	92.6161	151.845	210.345	341.81
165.6	-170.678	-111.413	-87.2209	-56.4672	-20.0983	8.27341	40.6033	83.7989	152.571	209.361	340.16
165.65	-168.054	-108.729	-89.3805	-52.915	-20.4732	9.5253	41.004	75.5482	149.654	211.591	336.019
165.7	-165.108	-110.222	-89.8918	-50.8312	-18.9988	10.9016	40.5957	75.5214	146.214	215.638	333.65
165.75	-164.106	-113.588	-87.1398	-48.557	-16.3317	12.3328	38.9913	81.1597	147.182	221.024	333.954
165.8	-163.503	-117.02	-83.8493	-47.0045	-13.3575	13.1604	37.0746	85.8223	151.895	226.769	334.657
165.85	-162.448	-121.266	-82.7911	-48.0725	-12.4966	12.4082	35.5092	88.2762	155.79	230.139	333.96
165.9	-164.616	-124.932	-82.7464	-52.8734	-16.8156	10.7121	35.1798	90.5032	156.314	230.834	332.606
165.95	-169.515	-125.8	-81.2398	-57.2926	-24.3498	9.30404	35.544	92.392	154.989	230.468	332.508
166	-172.384	-125.153	-78.4955	-57.1014	-28.2828	8.02155	34.9789	93.1915	154.268	228.764	333.835
166.05	-171.68	-123.614	-76.5984	-55.452	-26.9809	7.13222	33.6268	93.3489	153.447	226.144	334.962
166.1	-168.194	-119.571	-77.7701	-56.9557	-25.1913	5.47888	31.8685	92.4905	150.544	225.653	335.382
166.15	-164.675	-112.739	-81.7462	-60.4957	-25.9614	1.04607	30.9695	89.6058	146.189	227.059	336.729
166.2	-163.075	-107.896	-85.7958	-61.4386	-28.4001	-4.33957	33.7612	85.8172	142.679	227.024	339.198
166.25	-161.174	-111.121	-88.3168	-57.5049	-29.9446	-5.68561	39.3236	83.8135	141.217	225.486	340.372
166.3	-158.109	-121.367	-88.6375	-52.9923	-27.8481	-0.991279	42.16	83.9435	141.266	224.928	339.733
166.35	-157.364	-130.035	-86.9377	-53.9428	-23.1856	6.15937	40.4393	84.3336	142.466	224.501	338.699
166.4	-160.915	-131.712	-84.8496	-59.0357	-20.1868	11.0761	38.3729	84.7489	145.155	221.877	337.161
166.45	-165.687	-128.96	-85.7586	-62.4448	-19.9225	12.575	38.7053	85.7566	148.865	219.629	335.317
166.5	-167.864	-126.712	-91.3229	-61.5418	-21.3076	11.2167	39.8559	86.6767	152.3	222.72	334.38
166.55	-166.474	-126.027	-96.8708	-57.8974	-24.2767	7.59219	40.0375	85.9453	154.992	229.598	333.568
166.6	-163.969	-124.757	-95.3261	-54.5111	-26.8473	2.61828	39.29	83.8941	156.961	234.45	332.134
166.65	-164.107	-123.888	-89.0248	-50.1946	-26.752	-3.05188	38.1668	83.0572	156.498	235.268	331.607
166.7	-167.382	-126.272	-85.604	-44.7283	-25.9199	-6.52761	36.9483	84.2805	152.687	233.07	332.998
166.75	-170.398	-130.141	-86.8188	-46.3252	-27.8767	-4.04118	36.7115	85.228	148.597	229.418	333.612
166.8	-169.723	-131.48	-89.7783	-56.9095	-29.4836	3.60105	37.541	84.4201	147.645	226.954	329.816
166.85	-165.923	-131.188	-89.9765	-64.0324	-25.2602	10.4911	37.9207	82.9465	149.199	227.114	323.73
166.9	-163.1	-129.859	-85.0446	-62.483	-18.9208	11.414	36.6097	82.1586	149.824	227.971	321.255
166.95	-164.359	-126.203	-79.5299	-59.1256	-17.1953	6.46885	32.8505	82.6787	148.101	228.069	323.542
167	-168.345	-123.192	-78.8805	-56.9696	-21.9772	0.73801	29.4266	84.545	147.621	228.37	328.497
167.05	-171.219	-123.518	-80.9852	-54.3029	-28.602	-0.528863	30.9239	85.4553	151.255	229.249	333.879
167.1	-171.786	-123.786	-82.019	-49.83	-29.7574	1.74612	36.2518	82.2986	156.131	230.275	337.044
167.15	-171.726	-121.764	-82.3322	-45.0662	-25.2766	3.16877	40.7101	78.2022	158.83	230.572	337.576
167.2	-172.412	-121.035	-82.6356	-45.2932	-20.7529	4.26706	41.6395	78.565	159.729	229.091	337.644
167.25	-174.468	-123.326	-82.4104	-51.2384	-19.2718	5.94172	39.4215	80.2856	160.846	226.269	338.71
167.3	-176.812	-125.635	-82.5135	-55.4708	-20.1182	3.54071	37.6696	78.1685	161.163	223.945	339.087
167.35	-177.296	-125.295	-83.9896	-56.1801	-20.3637	-1.76124	38.5164	74.1427	156.569	224.805	335.918
167.4	-176.148	-122.953	-86.6198	-58.0326	-19.1018	-1.22179	39.3561	72.2101	147.52	229.079	331.024
167.45	-174.935	-121.555	-89.1092	-61.3021	-19.2834	4.69859	39.2774	72.8303	139.709	231.418	329.433
167.5	-173.925	-121.34	-88.9738	-61.5383	-21.4657	8.51991	40.9675	74.7533	135.739	229.296	332.149
167.55	-172.6	-118.973	-85.79	-56.9972	-21.7315	9.4642	43.5372	76.5247	134.29	228.026	335.262
167.6	-169.904	-114.265	-83.3327	-50.4086	-19.4411	11.1748	43.0654	77.3129	135.165	229.607	335.717
167.65	-166.21	-112.166	-84.2244	-45.2948	-17.6783	14.0424	40.8092	79.055	139.359	229.091	334.772
167.7	-163.476	-115.858	-85.9539	-42.7703	-18.0428	15.0135	39.9787	83.3197	145.813	224.828	335.795
167.75	-162.474	-123.122	-85.7303	-41.5071	-19.118	11.5586	39.4503	87.3473	150.875	220.831	340.333
167.8	-161.922	-129.196	-85.822	-41.4259	-18.2423	5.56474	39.0301	90.236	151.573	219.58	345.498
167.85	-161.104	-130.337	-88.6198	-43.7866	-14.5677	1.79551	40.156	91.8697	148.048	218.652	347.067
167.9	-160.3	-127.349	-92.3113	-46.5027	-10.5685	2.1767	43.5508	88.7213	144.289	214.187	346.19
167.95	-160.491	-125.559	-95.4277	-46.9483	-9.3225	4.82312	47.2941	82.1352	143.828	208.598	346.209
168	-161.357	-126.835	-97.4755	-46.5	-10.9193	6.32539	46.6523	79.3335	145.451	207.389	347.283
168.05	-162.113	-126.535	-96.795	-46.8024	-13.3478	5.96923	41.9004	83.0446	146.74	209.942	348.036
168.1	-164.404	-122.509	-92.926	-48.3993	-15.7545	5.36665	38.8038	90.1956	147.146	211.885	346.445
168.15	-169.502	-117.707	-87.959	-53.0667	-18.7955	4.67269	38.0138	95.1337	145.61	210.076	343.155
168.2	-174.691	-113.539	-84.2157	-59.8278	-22.9611	3.80469	38.0863	94.8445	140.458	207.027	341.765
168.25	-175.21	-111.118	-83.2182	-63.4844	-26.2881	4.66717	39.9189	92.2629	134.512	210.334	341.848
168.3	-168.719	-112.942	-86.1166	-60.9384	-25.8009	9.0095	42.598	90.259	132.458	218.787	340.051
168.35	-159.836	-117.745	-91.8984	-55.3816	-22.9476	15.688	44.4431	88.0036	135.708	222.954	334.696
168.4	-155.367	-120.93	-95.8013	-51.7029	-21.7376	20.5319	46.3293	86.644	142.243	220.976	328.689
168.45	-154.616	-119.97	-93.8876	-50.6556	-22.9798	19.7379	50.1338	88.1532	148.814	217.91	329.241
168.5	-153.885	-116.401	-88.6658	-49.6814	-25.4597	13.3847	54.3438	91.0872	151.739	218.411	336.956
168.55	-154.039	-113.279	-86.6432	-47.1679	-27.5304	5.37302	55.4033	92.5551	149.537	222.221	344.633
168.6	-156.366	-113.736	-90.5673	-44.0197	-26.2469	0.458174	53.0172	92.125	146.121	223.662	350.216
168.65	-158.443	-118.834	-95.9428	-42.735	-19.7383	0.608404	49.4856	91.4593	145.488	221.09	352.419
168.7	-158.583	-124.287	-96.822	-44.7089	-11.7668	3.93754	45.5162	90.7082	146.153	218.931	345.913
168.75	-158.573	-125.283	-91.978	-47.3872	-9.17823	7.22591	40.9062	89.552	146.526	220.072	334.217
168.8	-158.813	-122.772	-84.3242	-47.0692	-12.7619	9.87333	36.2848	89.2858	147.243	221.834	329.143
168.85	-157.042	-121.056	-78.9092	-45.2526	-16.5651	13.8438	33.0226	91.2204	148.567	219.364	333.743
168.9	-154.356	-122.251	-78.506	-45.9112	-16.6395	18.9634	32.072	94.2483	150.121	214.915	341.276
168.95	-153.406	-124.979	-80.0957	-48.3202	-14.2412	22.5915	32.9778	96.2941	150.767	217.012	345.495
169	-152.493	-126.319	-80.4751	-49.708	-13.9366	22.8961	35.0945	96.295	150.541	224.69	345.66
169.05	-151.12	-124.06	-81.2869	-50.7316	-19.5035	19.372	38.6134	94.2923	150.854	229.208	343.501
169.1	-154.264	-118.259	-84.0876	-52.9998	-27.8802	13.0786	42.2519	91.201	151.156	227.684	339.67
169.15	-163.156	-112.364	-85.604	-56.7807	-32.1091	7.70199	43.0801	87.9306	150.033	224.261	336.403
169.2	-171.55	-109.372	-82.8105	-60.1959	-29.8591	7.38202	40.3559	85.2015	147.432	223.628	337.548
169.25	-174.048	-108.626	-77.69	-59.7407	-24.4906	12.4872	36.6554	83.8541	144.947	225.723	341.676
169.3	-172.119	-110.457	-73.6949	-55.6965	-20.3686	18.2958	35.693	83.7138	144.787	226.484	343.469
169.35	-170.783	-117.157	-72.495	-51.998	-18.3491	19.035	38.7825	83.5006	146.762	223.965	341.353
169.4	-172.502	-126.331	-74.2026	-50.9021	-17.6064	14.2678	43.3915	83.4179	147.725	220.15	339.912
169.45	-175.148	-131.59	-75.8555	-51.7484	-18.6213	9.38543	46.0635	85.0405	146.62	217.986	342.545
169.5	-174.975	-131.558	-74.1328	-52.355	-19.5777	7.73213	45.5791	87.816	145.985	219.315	346.636
169.55	-169.847	-130.043	-71.8744	-50.3133	-18.0739	6.48346	43.1215	88.0386	146.662	222.593	350.026
169.6	-161.65	-128.432	-75.1715	-46.0152	-15.6833	3.62047	40.9759	83.9846	147.057	223.973	353.614
169.65	-156.978	-126.218	-83.6788	-43.6085	-15.7746	2.13546	39.8957	80.1209	146.657	222.316	357.017
169.7	-160.209	-124.694	-90.5878	-44.4306	-19.7654	5.10671	39.0686	81.0115	145.55	219.52	357.81
169.75	-167.411	-125.282	-92.2742	-43.7272	-26.1629	11.0401	38.937	84.6479	144.267	216.629	354.411
169.8	-172.989	-128.073	-91.4542	-40.398	-30.4832	16.1207	41.7141	87.6345	143.873	214.49	347.912
169.85	-175.248	-131.157	-91.6931	-41.8983	-29.8507	18.1084	48.3716	88.7602	143.613	214.72	341.225
169.9	-173.776	-131.955	-94.0871	-51.3069	-26.7332	18.1027	54.9478	88.0269	142.932	217.023	335.964
169.95	-170.223	-131.504	-97.393	-60.7152	-22.6587	17.2618	54.7165	87.2293	143.698	218.681	332.822
170	-167.714	-132.787	-98.292	-63.5404	-15.067	14.2389	47.4063	88.9553	146.767	218.756	332.734
170.05	-167.857	-135.539	-95.3931	-61.1066	-6.63288	9.20057	40.646	92.8116	150.652	219.735	335.373
170.1	-171.398	-136.695	-91.4913	-56.8476	-5.95015	6.25892	39.7978	94.8951	153.685	221.956	338.158
170.15	-176.84	-133.432	-88.6939	-54.3634	-15.3889	7.62458	42.3836	93.6794	154.501	221.219	338.662
170.2	-179.602	-126.213	-86.2713	-56.2992	-27.144	11.4796	43.4884	92.2693	152.305	216.855	337.326
170.25	-177.244	-119.764	-82.9787	-59.5506	-33.2921	17.9758	42.6652	91.445	148.487	213.796	336.473
170.3	-172.897	-117.455	-79.3062	-59.3325	-33.3541	27.1278	42.7274	89.4537	145.698	214.144	337.598
170.35	-171.311	-118.413	-78.0069	-56.6038	-31.4167	31.0974	44.1065	87.9799	144.005	216.658	339.856
170.4	-174.137	-121.179	-80.863	-54.5981	-31.3624	22.5732	44.4535	88.9785	142.918	220.869	340.453
170.45	-178.881	-125.904	-86.0171	-53.7351	-33.5028	7.79289	43.777	91.087	145.405	225.294	338.305
170.5	-181.205	-131.841	-90.155	-52.8678	-34.0427	-1.72203	44.4988	93.2954	152.888	227.443	334.758
170.55	-178.789	-134.693	-91.8181	-51.7354	-31.1228	-3.33743	48.3394	96.5535	160.105	226.139	330.242
170.6	-174.2	-131.654	-92.2627	-51.576	-26.8185	-1.85869	53.9573	99.1383	161.877	222.817	326.221
170.65	-172.755	-126.503	-92.5193	-53.4798	-23.0629	-1.22694	55.281	96.8997	159.256	220.885	326.4
170.7	-177.04	-124.035	-92.2485	-57.2508	-21.7575	-2.54459	47.4372	90.0251	155.983	222.217	330.74
170.75	-183.982	-124.667	-92.1171	-61.6461	-23.0522	-4.78164	36.3588	84.02	154.333	225.946	334.654
170.8	-189.238	-126.339	-93.6261	-64.138	-23.8167	-5.21216	32.6524	84.58	154.315	228.752	335.375
170.85	-192.78	-128.315	-96.5442	-63.882	-22.4401	-2.11639	37.118	92.1864	154.449	226.399	334.564
170.9	-194.528	-132.019	-98.3874	-62.3982	-20.1743	3.84083	41.7401	98.9902	153.942	220.267	334.208
170.95	-189.133	-136.881	-96.697	-60.3338	-19.2132	9.98682	41.0424	96.3421	154.745	216.251	334.364
171	-173.854	-139.69	-92.6663	-58.1084	-21.2411	11.8575	37.1177	86.4436	158.407	216.033	334.914
171.05	-156.985	-140.074	-89.8539	-56.187	-24.9703	8.7268	34.8537	78.3359	162.928	217.33	335.033
171.1	-149.937	-139.838	-90.0426	-54.4865	-27.3091	4.96782	34.8995	75.2433	166.779	219.047	333.586
171.15	-154.596	-138.922	-92.7798	-53.0501	-26.9971	3.90241	35.0588	74.6949	169.441	220.719	332.87
171.2	-164.649	-135.809	-96.0704	-52.2626	-24.1745	6.16099	35.2372	76.1199	167.676	220.532	335.844
171.25	-173.808	-130.289	-97.4268	-53.0465	-20.2098	10.0999	35.7489	79.2657	159.129	218.14	340.104
171.3	-178.599	-126.031	-97.6897	-55.2687	-18.4126	11.6395	35.5295	80.879	147.83	215.257	340.989
171.35	-179.28	-126.355	-99.9079	-57.3278	-20.5918	8.57598	34.278	80.194	140.278	213.517	337.968
171.4	-178.473	-128.089	-103.527	-58.6405	-24.4772	3.1501	33.8298	79.929	138.513	216.174	334.221
171.45	-176.41	-127.16	-104.615	-59.7322	-28.1311	-0.821134	36.0115	80.4295	139.657	223.363	332.354
171.5	-172.705	-124.506	-101.537	-60.7909	-31.8944	-1.27495	38.7679	80.5854	139.974	227.83	333.286
171.55	-170.21	-122.827	-96.7319	-62.3915	-33.8071	-0.506954	38.3515	80.1596	138.307	223.865	336.248
171.6	-170.639	-123.895	-93.1157	-64.8392	-31.1913	-0.528475	35.3082	78.6089	136.399	215.199	338.704
171.65	-172.703	-128.008	-90.7364	-66.9618	-26.8888	0.863457	33.6099	76.0125	136.927	208.821	341.311
171.7	-175.639	-132.28	-88.327	-66.9645	-25.5638	3.92122	34.5132	73.3388	139.993	207.317	346.828
171.75	-177.407	-132.883	-86.435	-63.0373	-25.6444	5.15932	35.3259	71.4775	143.965	208.818	351.136
171.8	-175.988	-130.576	-86.3194	-55.7345	-24.9421	4.3884	34.8999	70.9666	146.897	210.973	347.136
171.85	-174.596	-130.028	-88.2194	-50.858	-27.5079	5.1961	35.5404	71.6865	146.172	212.804	336.994
171.9	-177.348	-133.116	-91.9967	-53.057	-35.347	8.20288	38.2529	73.9985	143.847	214.038	328.088
171.95	-182.395	-137.071	-95.8352	-58.549	-40.9942	9.72687	40.6148	78.3062	145.456	214.959	322.671
172	-184.501	-138.839	-96.4323	-60.7109	-35.7678	7.66659	40.1307	83.462	149.132	216.794	319.689
172.05	-181.466	-137.243	-92.9033	-58.5265	-20.0593	2.88552	37.2188	87.3073	149.24	220.405	320.214
172.1	-175.524	-133.717	-87.9958	-56.1335	-6.02387	-4.08265	34.8799	89.0777	146.306	223.215	323.429
172.15	-169.782	-131.414	-85.1393	-57.6327	-4.92401	-11.2762	35.1976	89.1575	144.192	222.746	325.713
172.2	-167.189	-130.646	-86.0974	-61.6273	-12.6332	-14.2073	36.4841	87.8894	144.115	221.902	326.824
172.25	-169.109	-129.151	-89.7229	-62.9355	-19.8628	-8.85876	36.0402	86.6206	144.311	222.702	328.262
172.3	-173.041	-126.388	-93.5893	-60.2439	-24.9244	4.80619	34.9967	87.9038	143.182	221.683	329.856
172.35	-175.33	-123.356	-96.8876	-55.8581	-28.8987	19.271	35.1192	91.7625	142.249	217.46	332.02
172.4	-175.735	-121.237	-98.505	-51.0852	-32.3552	24.7147	34.1649	94.1345	143.471	214.528	334.228
172.45	-175.746	-122.027	-95.8192	-48.3614	-34.1211	19.7858	30.957	93.1566	146.513	215.952	334
172.5	-175.364	-126.884	-90.333	-49.1827	-31.0513	10.6149	28.3566	91.5026	149.696	219.52	331.508
172.55	-175.318	-132.64	-86.9266	-51.7915	-24.8072	2.44859	30.1613	90.6132	151.012	223.218	330.177
172.6	-176.655	-134.563	-86.4748	-53.858	-21.2987	-2.53121	37.4299	88.387	149.941	227.28	331.771
172.65	-177.133	-132.851	-87.4213	-53.3414	-21.0781	-4.69503	45.9483	84.1989	147.379	230.205	333.899
172.7	-174.672	-129.877	-90.2131	-50.7992	-20.994	-5.57455	49.8239	79.336	143.364	230.348	333.535
172.75	-172.168	-126.241	-94.6031	-50.6072	-20.8286	-4.47543	48.7433	74.2127	138.124	228.349	331.047
172.8	-172.493	-123.156	-97.9965	-53.8211	-21.4177	0.449858	45.8955	70.8286	134.566	225.672	328.073
172.85	-174.714	-121.871	-99.2543	-57.6331	-23.7912	6.85562	42.6931	73.1389	135.201	224.479	324.534
172.9	-177.115	-122.639	-99.027	-60.5129	-28.9844	10.3582	40.1457	80.7543	137.858	226.428	321.702
172.95	-179.246	-125.85	-96.8284	-61.1325	-33.9544	9.80239	39.3733	87.2165	137.856	229.139	322.089
173	-179.948	-129.433	-93.1186	-59.076	-34.8065	6.92517	39.5477	89.3226	134.087	229.161	324.717
173.05	-178.521	-129.555	-91.8873	-56.7938	-33.2847	4.73845	39.2883	90.1136	130.195	225.999	326.326
173.1	-177.113	-127.388	-94.6867	-55.9858	-32.9319	4.94586	38.4956	90.3876	132.36	221.746	326.801
173.15	-177.161	-126.59	-97.2627	-56.7849	-32.6965	5.94153	38.3629	87.5672	144.036	219.451	328.049
173.2	-178.101	-127.572	-95.8221	-58.5735	-30.1454	6.82964	40.2502	82.7467	158.369	219.132	328.408
173.25	-179.671	-129.568	-92.6751	-59.1014	-27.0283	7.89262	42.6253	79.4866	164.394	216.779	325.651
173.3	-181.41	-132.439	-92.5595	-57.6819	-26.275	7.78025	42.9511	79.9202	161.523	210.582	322.025
173.35	-183.721	-134.224	-94.7286	-55.8443	-27.7306	6.09382	42.7212	85.2677	157.074	204.829	320.678
173.4	-186.449	-133.523	-95.1014	-54.6358	-29.4091	4.86549	43.8164	93.3241	154.212	206.846	322.575
173.45	-187.696	-132.23	-93.0152	-55.1843	-29.8753	4.01856	44.4553	97.7739	151.001	218.948	326.345
173.5	-186.696	-132.015	-90.937	-57.519	-29.1826	2.08	42.5934	95.694	145.898	232.518	328.399
173.55	-185.384	-131.895	-90.7837	-59.1945	-27.674	0.518975	38.0814	89.7196	140.229	237.266	326.12
173.6	-185.217	-130.266	-91.4694	-59.3596	-25.2249	1.2164	32.3444	83.6197	137.106	234.335	322.055
173.65	-184.448	-127.549	-91.3522	-59.6499	-22.7863	2.58088	28.9085	80.333	137.789	231.557	322.938
173.7	-181.044	-124.906	-92.0184	-59.9268	-22.605	2.31366	30.306	81.6644	139.445	232.197	331.506
173.75	-177.237	-122.575	-94.034	-59.0949	-25.2358	1.14963	35.4194	86.6111	138.957	233.228	341.775
173.8	-177.196	-122.245	-94.1603	-57.8428	-29.3909	-0.0330819	40.2733	90.56	137.076	231.091	345.876
173.85	-179.645	-126.227	-91.5737	-56.8056	-32.4341	-2.10067	41.3106	89.0667	135.631	226.2	343.581
173.9	-180.453	-131.508	-89.1469	-55.466	-32.445	-4.61638	39.5058	84.897	136.248	222.7	339.631
173.95	-179.074	-133.09	-89.3044	-54.3797	-31.923	-5.85151	39.0238	83.8459	139.877	222.805	335.627
174	-176.548	-130.72	-91.8268	-55.0298	-32.5139	-5.61646	40.4682	85.9397	144.087	223.717	331.898
174.05	-173.75	-127.477	-94.0956	-56.884	-30.5977	-4.90099	41.1864	88.1203	146.547	222.105	330.61
174.1	-172.323	-125.901	-94.839	-57.7003	-26.244	-2.819	40.845	89.3825	148.049	217.353	332.125
174.15	-173.424	-125.881	-95.0928	-57.3086	-25.3827	1.62485	39.6102	89.8674	147.777	212.471	333.93
174.2	-177.23	-125.809	-94.1195	-57.7334	-29.0379	6.55397	37.2612	89.6376	143.547	212.258	333.741
174.25	-182.355	-124.649	-90.9209	-58.6969	-32.7352	9.51168	35.9349	88.3502	138.142	216.914	331.074
174.3	-184.814	-122.954	-88.0767	-58.3684	-33.7972	9.61486	37.0852	87.1054	137.136	220.562	327.536
174.35	-181.766	-122.612	-88.0839	-56.8238	-32.7538	7.40405	38.6453	88.0706	140.466	219.224	325.161
174.4	-174.077	-124.121	-90.145	-55.4127	-30.9683	5.63681	39.694	90.6713	143.664	215.099	324.436
174.45	-166.524	-125.446	-92.0863	-55.1482	-29.3402	5.57693	39.7513	92.7777	144.825	213.416	325.616
174.5	-165.288	-125.61	-93.8041	-56.5684	-27.7953	4.96435	37.9376	93.8574	143.664	217.06	328.997
174.55	-170.021	-125.36	-96.5478	-59.2767	-25.066	2.57696	36.1096	93.4974	140.323	223.67	332.202
174.6	-174.88	-124.81	-97.4989	-61.4919	-21.7352	0.340473	35.6821	91.563	137.753	228.357	332.148
174.65	-175.589	-125.36	-93.3043	-60.7137	-19.6596	0.0679475	34.7552	88.2705	137.276	228.926	330.725
174.7	-170.901	-127.833	-87.1596	-57.1545	-18.3973	1.19794	32.9866	84.7466	136.84	226.932	331.804
174.75	-164.615	-129.314	-83.4738	-54.8686	-17.7716	2.59211	32.414	84.327	136.492	224.972	334.342
174.8	-162.046	-127.918	-81.5662	-56.202	-20.2953	4.22217	33.4479	87.6406	137.844	224.538	335.603
174.85	-162.017	-126.881	-80.5139	-58.6136	-25.5882	5.12925	35.6924	89.6607	140.937	225.89	336.266
174.9	-162.405	-128.593	-81.854	-59.4649	-29.4667	3.75668	37.506	86.8948	145.148	227.6	337.279
174.95	-164.695	-130.268	-85.6807	-58.9449	-29.5638	0.0752221	36.1608	82.8674	149.852	227.696	337.817
175	-167.91	-128.816	-90.0954	-58.8913	-27.7781	-5.21302	33.5241	81.4792	153.242	226.916	337.481
175.05	-171.055	-126.027	-93.0697	-60.525	-28.2246	-8.62694	34.0157	82.3908	152.738	227.105	335.521
175.1	-175.829	-125.046	-93.2883	-61.5714	-31.2645	-5.53507	36.2151	84.8114	149.416	226.901	330.857
175.15	-180.195	-125.763	-92.2465	-59.0189	-32.7228	1.02274	36.255	87.6554	146.469	225.581	325.801
175.2	-181.323	-125.888	-92.5987	-54.6864	-30.793	3.43416	33.9814	88.3282	144.859	223.435	322.763
175.25	-181.258	-124.761	-94.8984	-52.3733	-28.5501	1.51054	30.7709	86.6019	143.443	220.459	320.68
175.3	-182.242	-123.582	-99.0648	-52.3898	-29.7191	0.441683	28.6046	85.4221	141.474	218.326	318.813
175.35	-182.92	-123.887	-104.515	-53.1347	-32.8589	2.00209	28.881	87.1044	139.612	218.195	318.707
175.4	-181.083	-125.773	-107.37	-53.8688	-32.3941	4.13196	30.7629	91.2998	139.143	219.24	322.164
175.45	-177.026	-127.699	-104.168	-54.7767	-29.4994	3.97289	32.2689	94.6116	139.493	220.484	327.563
175.5	-172.729	-129.918	-98.826	-55.9879	-30.2815	0.816799	31.2716	93.8402	139.01	221.714	330.644
175.55	-169.637	-133.077	-98.2094	-59.2814	-34.2147	-2.50173	27.6008	90.2276	138.649	223.625	330.476
175.6	-169.951	-134.68	-100.575	-64.8754	-35.0112	-2.0803	25.235	86.9283	140.99	225.478	329.383
175.65	-172.472	-134.081	-99.5974	-68.4277	-30.8281	2.89726	27.1594	84.7515	145.057	225.16	327.985
175.7	-171.622	-133.567	-96.7953	-67.248	-25.6385	8.54448	30.5065	82.9153	146.833	221.982	325.064
175.75	-167.818	-133.009	-96.3533	-64.2424	-22.2206	12.0734	31.9093	81.7244	145.149	217.065	321.74
175.8	-168.436	-130.225	-97.8316	-63.7857	-20.5581	14.362	32.2439	82.7037	141.895	212.562	321.399
175.85	-174.972	-125.269	-99.5282	-66.5616	-19.7552	14.5228	34.0701	85.1145	139.75	210.122	324.243
175.9	-181.209	-122.236	-99.2136	-67.821	-18.5456	11.1972	37.9059	86.2777	140.332	210.038	326.36
175.95	-181.829	-122.927	-96.4275	-64.6836	-16.921	5.58871	41.0445	85.3114	142.497	212.473	325.556
176	-178.785	-123.714	-93.9249	-61.2733	-16.2935	0.173514	39.745	83.8029	144.178	215.956	322.725
176.05	-177.925	-122.064	-93.5643	-60.9372	-16.5552	-2.53446	34.5657	82.7673	145.491	216.985	321.197
176.1	-180.412	-120.46	-95.3415	-61.31	-18.3952	-2.85002	30.3714	81.1942	146.422	214.91	323.974
176.15	-182.17	-122.368	-95.634	-60.1147	-22.0803	-2.83656	29.3896	79.1244	145.854	212.556	329.112
176.2	-182.54	-127.247	-92.5611	-58.1723	-23.9057	-1.98979	29.181	79.0921	143.25	211.137	330.466
176.25	-182.878	-129.564	-91.5863	-55.8594	-20.9922	0.793527	28.2944	81.7607	140.525	209.624	325.175
176.3	-182.118	-126.537	-93.9532	-53.8262	-16.7871	5.0305	28.8018	84.7405	140.494	208.097	319.081
176.35	-180.544	-124.822	-94.7849	-54.3146	-15.8065	9.39906	31.9786	87.2266	143.473	207.411	318.869
176.4	-180.007	-128.682	-96.2952	-57.3846	-16.3438	11.1093	34.9214	90.0647	147.234	208.564	322.254
176.45	-179.598	-132.573	-100.326	-60.9596	-16.4223	8.15642	35.3718	91.1531	150.101	211.834	323.556
176.5	-177.239	-130.702	-98.6351	-64.5495	-18.1787	2.86935	34.1978	87.5068	151.2	216.287	322.184
176.55	-174.605	-124.964	-88.3907	-68.5582	-21.198	0.0217855	32.2773	81.3204	150.265	220.164	321.325
176.6	-174.507	-119.502	-79.1887	-73.6375	-22.2093	2.00335	32.3293	78.8733	148.613	222.489	322.492
176.65	-175.605	-113.594	-78.1201	-79.6371	-21.2338	5.18871	34.3606	81.5946	148.163	223.132	323.813
176.7	-175.198	-107.19	-83.9626	-80.4825	-19.1291	4.7505	32.5138	85.6014	148.555	222.802	323.382
176.75	-174.147	-105.11	-90.2159	-70.4133	-15.6234	1.11665	26.8577	89.8452	147.377	222.309	322.715
176.8	-173.774	-109.858	-91.312	-55.6995	-11.5965	-1.24977	25.2608	94.8297	145.121	221.717	324.014
176.85	-173.504	-117.906	-90.2959	-47.7486	-9.04893	1.22623	30.2212	97.6269	145.429	221.964	325.266
176.9	-174.168	-124.258	-92.4823	-48.3681	-9.38782	6.09635	37.5166	97.353	149.108	222.903	322.486
176.95	-177.185	-127.53	-96.3758	-53.1059	-12.024	8.41697	42.8328	96.3245	152.465	222.248	317.111
177	-180.938	-129.635	-96.9986	-58.159	-14.4694	8.06969	44.5716	94.4665	152.577	218.722	314.788
177.05	-181.998	-130.747	-92.9943	-61.8848	-15.1589	7.17331	44.1111	91.0475	150.685	213.034	316.336
177.1	-178.336	-129.467	-87.47	-65.349	-16.9755	5.27122	42.4822	88.5125	149.637	208.738	318.135
177.15	-172.083	-126.669	-85.4635	-67.2061	-20.8144	1.12509	39.0263	87.557	149.885	209.628	318.735
177.2	-168.67	-124.862	-87.5247	-63.8888	-24.2407	-5.88202	36.2694	85.278	148.909	211.646	319.764
177.25	-170.698	-123.85	-89.0982	-58.5469	-26.5478	-11.4336	37.6826	82.8307	143.948	208.846	323.296
177.3	-175.107	-122.258	-88.1256	-57.6667	-27.8796	-6.94475	40.6066	83.9606	136.193	203.107	328.368
177.35	-177.616	-122.976	-87.0372	-59.2827	-27.5948	5.08044	40.7415	86.2932	131.239	200.464	330.998
177.4	-177.871	-127.953	-87.8972	-58.9733	-25.2223	12.298	37.9721	85.9889	129.534	204.22	328.948
177.45	-178.518	-131.979	-90.5718	-57.3629	-21.557	13.7311	33.1447	84.7163	125.94	212.284	325.404
177.5	-180.442	-130.415	-93.2278	-56.4225	-19.6071	14.4763	25.6991	85.8041	120.072	220.15	325.276
177.55	-181.773	-126.349	-94.372	-56.8308	-23.5167	12.294	21.5033	89.997	117.638	223.419	327.159
177.6	-181.749	-124.385	-94.1343	-57.6423	-31.5028	5.34789	28.3046	94.7315	121.399	220.992	326.759
177.65	-181.684	-125.117	-92.2777	-57.6464	-36.3843	-1.68219	40.5248	96.2709	126.952	217.802	324.462
177.7	-181.791	-126.947	-89.0449	-58.1739	-35.2463	-3.42059	46.238	93.7997	130.039	218.487	322.089
177.75	-181.152	-128.27	-87.1235	-61.7177	-31.9335	0.836703	44.5293	90.3558	132.828	221.873	320.292
177.8	-180.604	-129.095	-87.6934	-66.3443	-29.0191	7.15996	40.5051	88.4756	136.368	224.556	320.098
177.85	-180.424	-130.564	-89.502	-66.8	-26.7257	9.96733	36.6708	88.4647	138.222	224.104	321.707
177.9	-178.803	-131.377	-92.1048	-62.5296	-25.7726	7.00835	34.5824	90.0129	140.533	221.588	324.697
177.95	-175.429	-128.18	-95.0735	-57.6489	-25.8137	0.919261	36.6224	91.4593	144.001	220.227	328.729
178	-173.187	-122.167	-96.491	-55.1273	-26.9139	-3.49103	42.5685	91.4616	142.299	220.562	332.913
178.05	-174.778	-119.335	-95.3895	-55.8198	-29.7487	-2.7087	46.1309	89.5984	133.791	219.595	335.456
178.1	-177.714	-122.294	-94.1856	-58.0116	-31.7737	1.83499	42.3449	86.925	126.344	216.366	334.59
178.15	-176.425	-127.913	-94.7805	-58.3527	-30.1097	5.14717	36.0651	86.1894	126.876	212.775	330.31
178.2	-172.149	-131.532	-94.2688	-56.7174	-27.4912	4.34106	31.9417	85.9577	132.933	209.06	323.908
178.25	-171.082	-129.703	-89.9627	-55.5377	-26.2018	0.201279	28.7654	83.1583	137.796	204.962	319.169
178.3	-173.739	-123.701	-84.9716	-56.5024	-24.2982	-4.25932	27.583	81.5217	140.745	201.24	321.213
178.35	-174.97	-119.604	-82.7599	-59.6643	-22.2626	-5.84862	31.0875	84.557	143.514	199.946	328.55
178.4	-173.186	-121.12	-84.4214	-62.9402	-21.3021	-3.34629	35.7529	86.4764	145.821	204.048	334.034
178.45	-173.251	-125.823	-91.5166	-63.7206	-19.0483	1.12219	36.1517	82.8213	147.117	211.394	333.897
178.5	-177.998	-130.452	-100.293	-61.9513	-15.1266	4.30851	33.5525	77.4883	147.775	215.563	330.202
178.55	-182.366	-134.607	-101.496	-59.837	-13.4974	4.95899	32.3811	76.0657	148.958	216.055	326.689
178.6	-181.229	-136.941	-93.8854	-59.2054	-15.9877	3.88678	34.2325	79.0428	149.739	216.444	323.288
178.65	-176.339	-135.302	-87.576	-60.1934	-19.5567	2.21308	37.4379	82.4717	147.582	215.884	319.375
178.7	-172.225	-131.651	-89.7906	-61.7448	-22.1842	0.655088	39.4602	83.7705	144.02	212.873	319.468
178.75	-170.116	-130.092	-95.9229	-62.8861	-24.952	0.0303042	39.9554	83.7382	142.042	208.816	324.138
178.8	-168.687	-131.807	-99.3646	-63.1181	-27.7948	1.20377	39.9483	83.6005	141.527	206.17	325.285
178.85	-168.586	-135.006	-100.272	-62.1353	-28.2291	3.14189	40.1266	83.0128	141.302	207.609	321.51
178.9	-171.557	-137.788	-99.7896	-61.4637	-25.5906	3.71411	41.3101	81.9898	141.224	211.771	317.381
178.95	-177.779	-139.01	-98.3216	-63.2751	-23.3657	3.04762	42.7198	82.0494	140.617	213.731	313.617
179	-186.081	-138.61	-97.5409	-67.0125	-24.4362	2.1501	41.2773	83.2241	138.861	213.765	311.706
179.05	-191.679	-136.678	-96.8917	-70.4064	-27.2085	1.27986	37.4761	82.9016	137.669	215.359	314.945
179.1	-188.06	-132.8	-94.0404	-71.2873	-29.5745	1.30343	35.6996	80.6299	138.949	218.544	322.187
179.15	-176.591	-127.784	-89.7329	-69.051	-30.0257	1.81358	36.392	78.3835	141.721	219.106	328.621
179.2	-165.606	-125.649	-86.7916	-66.019	-27.5153	1.86133	35.8611	77.4867	143.269	214.162	330.591
179.25	-160.336	-129.761	-85.6158	-63.949	-23.7941	2.44517	32.9219	78.821	142.091	207.914	327.505
179.3	-159.575	-135.989	-84.5307	-61.5771	-23.1135	4.72523	30.6512	82.6996	139.912	205.92	321.925
179.35	-160.168	-136.123	-83.2733	-58.6576	-26.3814	8.56414	31.3632	86.8914	139.908	206.85	318.358
179.4	-161.534	-128.062	-82.91	-57.2727	-26.6662	12.2135	34.0476	88.6243	141.976	206.734	318.745
179.45	-164.167	-117.703	-85.0786	-58.408	-21.1523	12.3283	36.4142	88.1546	143.338	205.954	321.39
179.5	-167.053	-111.258	-91.4865	-60.5708	-18.5576	7.85027	36.5204	88.8194	142.9	207.774	322.21
179.55	-169.333	-110.874	-99.3559	-61.6635	-23.6368	1.80083	33.3309	91.4711	141.975	212.527	320.156
179.6	-171.176	-114.248	-100.62	-60.9147	-30.3049	-2.08682	29.0417	93.2692	142.313	218.159	319.24
179.65	-173.11	-117.313	-92.7786	-57.9238	-33.7323	-3.37423	27.7826	91.3004	143.704	222.831	321.02
179.7	-174.701	-119.656	-84.3964	-54.4344	-34.9183	-3.65573	31.1182	84.3716	143.344	223.664	322.597
179.75	-173.334	-122.022	-81.9525	-56.0499	-34.8546	-3.05369	36.5352	77.0475	139.432	219.885	323.181
179.8	-169.494	-122.856	-83.3844	-63.86	-32.3254	-0.623736	39.4297	76.1496	134.701	216.214	322.821
179.85	-168.973	-121.101	-86.4286	-68.1278	-27.3306	2.88912	36.6837	78.6745	133.403	217.513	320.867
179.9	-172.15	-118.662	-89.6692	-61.0562	-22.9579	5.50815	31.1521	78.1558	135.821	222.607	318.658
179.95	-172.829	-119.604	-90.4481	-50.5279	-22.8845	5.2795	29.3686	76.2166	138.572	227.322	317.536
180	-169.856	-123.053	-89.9099	-47.6222	-29.8105	1.99942	32.2882	76.394	139.861	228.923	317.984
180.05	-167.891	-124.473	-91.0559	-50.6364	-40.5308	-0.626408	33.7651	77.8771	141.23	226.296	320.296
180.1	-168.974	-125.35	-91.7954	-52.1739	-43.9838	0.51467	29.8918	78.5624	143.568	219.89	322.528
180.15	-170.737	-128.459	-91.2614	-50.0782	-34.9025	2.9319	24.0177	77.9398	145.334	213.612	322.52
180.2	-171.185	-130.182	-94.3663	-46.5296	-23.1198	2.54901	21.2808	78.9186	144.21	211.21	321.793
180.25	-171.015	-128.148	-99.8139	-44.2639	-18.6741	-1.45199	22.1471	84.5447	141.043	211.404	322.76
180.3	-170.911	-124.827	-100.39	-44.8294	-20.1607	-7.15229	23.4009	90.8111	139.265	212.21	324.712
180.35	-170.288	-122.894	-96.6123	-47.6221	-21.9433	-10.0153	24.0233	91.1683	141.068	214.174	325.831
180.4	-169.633	-122.69	-93.8638	-50.6907	-21.4172	-5.91836	26.8013	86.8632	145.856	216.969	325.865
180.45	-169.226	-122.901	-93.3623	-54.1872	-18.8116	2.66746	32.7295	84.3794	149.813	219.494	325.527
180.5	-169.222	-122.596	-93.8905	-57.9112	-16.3405	8.83039	37.438	86.6581	150.119	220.356	325.635
180.55	-171.001	-122.164	-94.245	-59.268	-17.2619	9.39662	36.7898	90.7389	149.141	219.525	328.094
180.6	-173.185	-122.639	-93.1827	-58.2875	-21.6566	7.40935	30.9382	92.0943	148.084	219.338	332.759
180.65	-171.94	-125.332	-90.2913	-57.5347	-26.475	7.96293	25.7987	90.5511	145.156	220.37	334.802
180.7	-167.84	-129.057	-86.95	-57.3466	-31.1023	10.567	28.5037	89.9119	142.461	219.659	331.332
180.75	-164.466	-130.729	-86.2405	-56.3949	-35.7634	10.6987	36.6284	91.7664	142.107	216.069	325.211
180.8	-162.466	-129.985	-88.6681	-54.286	-36.3641	7.70333	42.746	92.3411	140.66	211.807	321.08
180.85	-160.412	-128.715	-91.0826	-52.5563	-30.9313	5.10571	45.6316	86.1778	136.955	210.044	320.41
180.9	-158.918	-127.463	-91.5182	-53.6476	-25.3979	5.57864	47.7194	75.1756	135.183	211.793	321.442
180.95	-163.373	-125.683	-90.3211	-56.3382	-23.957	7.78341	50.2455	70.1537	136.939	214.935	322.199
181	-176.511	-124.019	-88.0943	-56.4691	-23.628	7.97234	52.7817	77.8992	139.814	216.436	321.394
181.05	-189.617	-123.125	-86.577	-53.8266	-22.3128	6.56203	53.4347	92.021	141.474	214.523	318.598
181.1	-191.115	-120.983	-88.5637	-52.4854	-22.0216	6.12723	50.3024	101.756	140.336	212.111	316.356
181.15	-182.617	-115.767	-93.846	-54.2185	-24.5488	4.88794	44.1517	103.742	136.178	215.287	315.915
181.2	-175.091	-110.939	-97.5721	-57.5921	-27.6837	1.91392	39.1269	101.747	131.248	222.674	315.137
181.25	-173.148	-113.25	-96.0771	-60.6858	-26.4948	0.141016	38.3438	99.7125	130.54	224.959	314.472
181.3	-172.485	-123.741	-90.768	-62.0604	-21.5043	0.241727	39.9281	97.6626	136.281	220.338	316.655
181.35	-170.536	-134.201	-83.3996	-61.5462	-18.8178	1.65113	41.4323	94.0152	143.547	214.399	320.213
181.4	-168.961	-137.712	-76.3028	-59.5896	-20.083	5.12401	41.6877	89.6627	147.383	207.996	323.181
181.45	-168.632	-135.538	-74.8869	-56.3892	-21.7174	9.52038	39.682	87.2966	148.982	200.719	326.392
181.5	-170.482	-130.989	-82.0921	-53.055	-22.4556	11.3657	37.4907	87.2816	150.198	198.296	329.022
181.55	-174.434	-125.682	-93.1039	-51.5978	-23.8163	8.78592	37.7654	86.6695	150.902	205.563	329.529
181.6	-175.901	-120.425	-99.3578	-50.8996	-25.6372	4.31866	39.2523	84.2343	152.233	217.308	329.162
181.65	-172.683	-115.519	-98.2707	-46.725	-25.9556	2.31759	40.6455	83.2472	154.373	224.455	328.181
181.7	-169.392	-113.429	-95.1576	-40.4492	-23.9143	3.56371	40.9571	84.7726	153.728	225.603	324.276
181.75	-170.639	-116.614	-93.5807	-39.34	-20.738	5.36787	39.0058	85.7149	149.442	225.224	319.366
181.8	-176.007	-122.178	-91.6461	-43.7859	-18.6105	6.3827	37.619	86.8647	146.044	225.538	319.381
181.85	-181.43	-126.165	-88.2245	-47.2155	-16.8702	8.33933	39.728	90.4339	145.676	226.255	325.563
181.9	-182.713	-128.562	-85.485	-47.882	-12.2122	12.0119	43.1265	93.4423	147.088	227.559	332.911
181.95	-179.61	-129.312	-86.2478	-48.5482	-7.42464	14.8934	44.3559	93.8726	148.895	228.322	336.417
182	-175.901	-127.467	-91.5552	-49.2078	-12.168	14.8825	42.9473	93.6452	148.789	227.699	335.807
182.05	-173.654	-124.252	-98.4734	-49.1974	-27.9	12.894	41.028	93.8751	147.056	227.537	334.589
182.1	-172.545	-121.251	-101.14	-48.8008	-42.6872	11.3532	40.2626	93.8971	147.484	227.607	335.089
182.15	-173.959	-118.964	-97.4213	-47.6342	-45.5898	13.317	39.2974	92.6285	150.062	225.837	335.928
182.2	-177.42	-119.224	-90.2002	-47.9433	-38.1651	18.7232	36.4027	89.6968	150.727	224.358	334.353
182.25	-179.169	-122.92	-84.4122	-53.3519	-29.0902	20.6372	32.918	87.4559	148.711	224.937	330.141
182.3	-177.426	-126.92	-84.5377	-62.0482	-24.052	13.8799	31.5657	87.9032	147.003	224.318	327.068
182.35	-173.815	-129.087	-89.2415	-67.3926	-23.2956	4.26046	32.9895	89.5162	147.799	221.342	327.547
182.4	-171.027	-130.058	-92.1269	-65.2863	-22.8278	0.681726	36.4964	90.4172	149.801	218.938	327.228
182.45	-170.619	-129.327	-91.3706	-57.5308	-19.7009	3.23761	42.3306	90.8188	149.222	218.814	322.901
182.5	-171.855	-127.142	-90.6937	-50.2644	-18.8241	6.83391	48.82	91.2136	145.512	219.71	318.543
182.55	-172.848	-126.754	-91.0437	-48.7696	-25.2658	9.90428	48.6714	91.6995	141.955	219.907	318.252
182.6	-172.743	-129.897	-89.7398	-52.0502	-33.0011	12.967	37.0473	92.8346	140.746	219.869	322.484
182.65	-171.643	-133.347	-87.6624	-54.8915	-34.0955	14.628	21.5756	93.8689	141.763	219.858	330.348
182.7	-170.176	-133.337	-87.6036	-55.1175	-29.3785	13.2385	14.2483	94.4326	143.837	218.218	338.318
182.75	-169.17	-131.174	-89.0623	-53.9269	-24.7352	8.50927	16.655	96.7491	145.022	215.439	341.53
182.8	-168.818	-129.57	-91.3089	-52.7149	-23.897	2.12069	23.3156	99.528	144.521	214.775	338.916
182.85	-169.688	-128.12	-93.6386	-51.2354	-25.3283	-1.84427	31.1997	95.2697	143.8	216.877	333.067
182.9	-172.934	-126.62	-93.5388	-49.21	-25.329	0.0283702	38.5667	82.5813	144.657	219.349	327.033
182.95	-176.629	-125.371	-91.7374	-49.2451	-23.4461	6.62635	42.7735	72.1207	148.687	221.313	322.797
183	-176.804	-123.091	-91.6666	-53.6522	-21.557	12.6331	43.4178	71.9334	156.746	224.533	322.565
183.05	-173.799	-120.337	-92.9378	-59.6043	-19.9068	13.5735	42.0852	76.7696	164.91	229.037	328.262
183.1	-172.29	-119.603	-92.7091	-62.0474	-17.1482	10.2523	38.6157	79.7752	164.692	231.466	335.996
183.15	-175.199	-120.789	-91.8651	-59.6633	-15.1131	7.06796	33.383	81.5235	153.653	230.555	338.186
183.2	-179.345	-121.659	-92.3834	-56.0718	-17.1393	6.45267	29.8359	84.0501	139.927	229.391	334.791
183.25	-180.01	-121.504	-92.1267	-55.0115	-21.7152	7.07658	30.9931	86.5478	133.199	229.797	332.07
183.3	-178.335	-122.321	-89.0913	-54.7866	-24.6606	7.96462	36.4843	87.7658	134.049	231.327	332.412
183.35	-177.105	-125.454	-87.0217	-52.3788	-25.6273	11.1499	43.3124	87.195	137.151	232.934	334.577
183.4	-175.247	-128.664	-89.584	-50.1077	-26.7936	15.6486	47.4406	85.08	141.453	229.415	337.705
183.45	-172.626	-128.342	-94.2014	-51.0744	-28.6466	15.7022	47.7499	83.0902	148.168	216.012	339.961
183.5	-170.933	-124.877	-94.7581	-53.5357	-29.4792	9.91751	47.9139	82.9121	153.972	200.41	341.055
183.55	-169.938	-122.546	-90.181	-55.3522	-28.5561	3.52715	49.2172	84.7643	155.205	196.093	344.4
183.6	-170.302	-122.159	-86.1533	-56.432	-27.421	0.452404	47.9389	87.027	152.108	203.811	348.148
183.65	-173.629	-121.519	-85.5435	-56.5865	-27.5817	0.715663	44.1472	87.7032	147.087	212.316	343.572
183.7	-178.62	-121.623	-85.2293	-54.8525	-27.5696	3.5303	41.5135	86.5951	143.23	214.864	328.413
183.75	-181.945	-123.558	-84.1911	-51.2418	-25.4851	7.52673	39.3837	85.0686	142.419	215.023	312.532
183.8	-181.119	-125.045	-86.099	-49.1585	-23.8258	10.5058	35.9974	85.1587	144.182	218.429	306.783
183.85	-177.412	-123.855	-91.7541	-52.1042	-25.8109	11.2106	32.5944	89.1247	146.991	224.258	311.079
183.9	-175.183	-120.644	-96.1013	-59.379	-29.5972	10.1082	30.1481	95.569	148.725	226.907	318.418
183.95	-175.567	-117.981	-95.9746	-66.7399	-30.6194	8.73415	27.9669	98.7082	147.729	224.124	325.361
184	-175.487	-117.558	-94.312	-69.4222	-28.0007	8.67313	27.0222	95.8047	144.977	219.409	332.111
184.05	-173.847	-119.487	-93.3107	-65.3198	-25.3876	10.6042	28.8421	89.8274	142.109	217.489	337.938
184.1	-172.361	-121.597	-91.4367	-57.4633	-25.9012	13.4221	30.6545	84.4008	138.662	220.438	340.801
184.15	-171.582	-121.796	-88.537	-50.1026	-28.7789	14.5942	30.8627	81.8245	136.191	225.244	339.493
184.2	-170.019	-122.369	-86.0636	-44.8932	-30.0015	13.7429	32.2937	82.7001	138.808	225.938	334.938
184.25	-167.091	-126.804	-84.3443	-43.4807	-27.4911	13.4083	34.209	84.5354	145.467	220.813	330.001
184.3	-165.323	-132.976	-84.1417	-46.6492	-23.0364	14.2286	33.8481	85.8104	149.23	214.368	328.429
184.35	-167.036	-135.877	-86.1401	-51.5773	-18.7385	14.4518	33.0424	87.5291	146.715	212.919	331.472
184.4	-171.866	-134.803	-88.757	-55.0504	-15.6747	14.2251	34.3953	88.902	141.367	218.532	335.316
184.45	-177.821	-132.887	-90.1955	-56.8397	-14.9147	14.072	38.4193	88.7507	138.54	226.426	335.863
184.5	-181.282	-131.82	-90.8061	-57.8508	-17.2819	13.3938	43.2536	88.2929	139.945	231.404	333.163
184.55	-180.238	-130.692	-91.8214	-58.0119	-22.1144	12.8009	45.1287	88.0205	143.223	231.981	330.729
184.6	-176.78	-128.339	-92.1666	-56.4374	-26.3897	13.291	43.0216	86.9755	144.748	228.79	331.726
184.65	-173.502	-125.488	-88.9914	-53.1334	-27.1266	13.5636	40.7616	85.3045	143.731	225.334	335.112
184.7	-171.782	-124.064	-82.5443	-50.3028	-24.4955	12.4905	41.371	84.1034	142.402	224.021	337.608
184.75	-171.737	-124.878	-77.1759	-49.7592	-21.1615	10.9567	43.2107	84.0133	142.556	222.937	338.895
184.8	-172.718	-126.999	-75.7675	-50.6566	-20.0282	9.80623	44.3952	84.785	143.655	220.632	338.855
184.85	-175.268	-128.089	-77.0376	-52.8281	-21.977	8.99487	44.9274	85.7982	144.905	219.354	336.146
184.9	-178.668	-125.352	-78.9866	-57.1106	-25.5406	8.20874	42.6881	86.3816	146.782	220.486	332.924
184.95	-178.739	-120.021	-81.4655	-61.9196	-29.0888	7.30709	37.0407	86.3365	149.561	221.164	331.588
185	-175.105	-115.875	-84.0877	-64.5883	-30.7734	6.76692	31.9958	85.6121	151.649	220.235	331.595
185.05	-172.022	-112.082	-84.7091	-65.2644	-29.4869	6.74214	30.1658	84.5569	151.316	220.684	333.767
185.1	-170.248	-106.03	-83.02	-65.0963	-26.7361	7.0753	30.7647	83.6567	148.977	223.279	339.021
185.15	-168.956	-100.947	-82.7302	-63.0985	-24.9607	8.75089	33.157	82.977	146.155	224.465	344.098
185.2	-171.025	-101.596	-85.6528	-59.2125	-24.7331	12.8659	37.6184	83.3051	144.98	222.452	345.044
185.25	-175.822	-107.862	-87.3518	-55.3496	-24.3257	16.7891	43.2589	85.3552	146.869	219.392	341.651
185.3	-179.135	-115.966	-85.0931	-52.7603	-22.5281	16.295	46.8617	86.6453	149.794	216.755	337.498
185.35	-181.169	-121.133	-83.8111	-52.8514	-20.6328	11.3089	45.7116	84.6266	151.308	214.179	335.023
185.4	-181.38	-121.871	-88.1693	-56.8089	-20.2378	6.36253	41.4106	81.8347	150.814	212.565	333.073
185.45	-175.792	-121.304	-96.0268	-61.5779	-20.7544	5.66692	38.1342	81.5845	148.184	213.181	330.487
185.5	-166.93	-120.802	-102.237	-62.5998	-20.1145	8.64403	37.6241	82.72	145.366	215.967	329.809
185.55	-162.5	-118.967	-102.506	-60.4542	-18.2525	11.117	38.6239	83.0196	145.217	219.515	332.388
185.6	-165.17	-116.497	-97.1723	-58.1434	-17.9465	11.3055	40.9294	82.9804	146.999	221.474	335.318
185.65	-172.702	-116.666	-91.0792	-57.0674	-20.3339	10.5215	44.0699	84.2782	148.178	221.038	335.214
185.7	-179.74	-121.341	-86.4086	-56.7866	-24.1908	8.90754	45.1803	87.0522	147.782	220.306	332.315
185.75	-181.298	-127.732	-82.2788	-56.6961	-27.6253	7.08823	43.798	89.5295	147.394	219.852	329.913
185.8	-179.164	-129.868	-79.395	-57.932	-28.4925	6.62415	43.9793	90.527	149.063	218.383	330.268
185.85	-175.01	-127.192	-80.5558	-60.3712	-26.6889	6.92331	47.449	91.0762	150.574	215.598	331.961
185.9	-167.897	-124.254	-88.3106	-60.5015	-23.255	6.86533	49.6697	92.7681	149.314	212.579	332.836
185.95	-164.26	-121.091	-98.6125	-57.4736	-20.5737	6.02432	47.1096	94.4563	148.006	211.565	333.057
186	-170.602	-115.474	-103.369	-54.984	-21.1857	4.21013	43.4521	94.2765	148.974	212.75	333.688
186.05	-180.41	-109.398	-101.502	-55.2533	-23.24	3.12854	42.3205	94.1424	149.785	212.91	334.666
186.1	-184.257	-104.824	-97.0249	-57.0666	-24.7246	4.67388	42.1429	95.5105	148.882	211.158	336.105
186.15	-182.252	-101.539	-92.0465	-58.1157	-26.1339	7.86254	42.5367	95.6652	147.731	211.207	338.444
186.2	-177.989	-101.218	-87.0764	-56.7075	-26.4666	10.4868	45.3075	91.897	147.021	215.031	340.22
186.25	-173.838	-106.352	-82.9789	-53.7009	-25.3493	12.4799	50.0286	85.2321	145.432	219.762	340.083
186.3	-171.933	-114.963	-81.372	-51.8602	-22.8898	14.7315	53.1722	80.2316	142.397	222.465	339.005
186.35	-172.353	-120.7	-82.4426	-52.3111	-19.4137	15.6143	50.8255	80.2013	139.775	222.936	338.344
186.4	-172.656	-122.087	-83.1471	-52.0773	-18.087	13.0254	45.2962	83.9513	139.044	221.308	338.934
186.45	-170.958	-122.493	-84.0147	-47.7009	-19.4375	8.78358	42.8319	87.1579	139.427	218.232	340.185
186.5	-168.86	-122.104	-90.9242	-43.0127	-19.2265	6.24925	44.1595	86.6368	140.762	216.217	341.383
186.55	-168.792	-118.978	-100.605	-44.7019	-15.7127	6.99231	45.5481	83.8712	143.894	217.316	342.521
186.6	-170.208	-113.191	-100.8	-50.1904	-13.21	10.7962	44.3169	81.5602	147.702	221.394	343.307
186.65	-171.181	-109.07	-91.3117	-51.9783	-14.7334	14.9373	42.4125	80.1609	150.123	225.484	342.609
186.7	-171.405	-111.149	-82.6585	-51.5827	-18.4599	15.9325	45.1473	80.3405	150.687	227.163	338.754
186.75	-171.405	-117.004	-80.8149	-55.0027	-22.8675	14.0152	51.3787	81.5689	149.83	226.931	331.911
186.8	-171.879	-121.785	-85.5719	-59.7658	-25.9518	11.6214	52.647	80.8926	148.225	226.193	326.388
186.85	-173.386	-126.461	-91.7079	-60.7465	-25.4947	9.96937	46.4938	79.1138	146.183	226.199	326.432
186.9	-175.389	-130.747	-93.1347	-61.4267	-24.492	9.11017	39.3779	80.2052	144.965	228.138	330.477
186.95	-176.763	-130.444	-90.7093	-64.8042	-24.5102	9.16006	36.8703	83.3787	147.36	231.331	333.93
187	-177.42	-126.242	-90.2377	-66.9433	-24.2311	10.9807	39.2136	85.1303	151.705	233.159	334.195
187.05	-178.256	-122.818	-93.3782	-64.5437	-26.3797	13.6313	43.1187	83.5383	151.572	230.856	331.62
187.1	-179.085	-120.82	-96.7402	-57.5843	-29.6548	14.7538	44.0808	79.2648	146.176	224.8	329.378
187.15	-177.829	-118.443	-97.3596	-49.9447	-27.1633	16.5603	40.3139	76.9395	140.945	219.665	329.289
187.2	-173.005	-116.322	-95.8895	-47.2491	-22.0375	22.8059	35.6461	80.2008	139.161	218.863	329.893
187.25	-166.766	-115.613	-93.9111	-49.5003	-21.5914	28.7816	35.3835	85.0342	141.468	219.694	331.078
187.3	-163.125	-116.471	-91.784	-51.6627	-24.0556	25.3617	38.3633	86.5771	145.065	218.069	334.002
187.35	-162.357	-118.186	-89.2482	-51.9212	-24.9506	14.6017	39.5909	86.3281	144.742	214.147	338.091
187.4	-161.588	-118.853	-86.4918	-50.6992	-24.2358	8.87537	39.7022	88.661	141.879	210.072	341.339
187.45	-161.205	-117.944	-84.7107	-49.1408	-24.4203	10.3492	42.1042	94.3806	141.254	207.431	342.098
187.5	-163.839	-117.139	-83.4611	-49.5539	-26.2203	11.0284	45.3734	99.0508	142.696	207.208	341.17
187.55	-168.967	-117.69	-80.6786	-52.0376	-28.3518	8.60301	44.9516	97.3268	145.75	210.469	339.465
187.6	-174.397	-118.322	-77.7867	-53.3495	-30.4149	7.44955	38.436	89.9811	150.683	216.167	335.959
187.65	-178.672	-116.385	-79.1318	-51.716	-29.809	10.5662	29.6992	82.4658	154.324	219.653	332.125
187.7	-180.869	-112.542	-85.3335	-48.5838	-24.0339	15.4394	25.863	77.6852	154.602	219.142	330.932
187.75	-180.396	-111.404	-92.0075	-46.1354	-16.1434	16.851	28.0068	76.2506	153.029	217.649	332.704
187.8	-177.603	-114.946	-94.4234	-46.6611	-11.9549	13.5371	33.1048	79.1036	150.971	216.989	335.115
187.85	-175.142	-119.684	-91.6242	-51.1058	-13.3037	8.97414	39.4887	82.0933	149.842	216.509	335.643
187.9	-175.396	-121.832	-87.359	-56.514	-17.621	6.98736	44.7968	80.7227	150.882	216.988	335.306
187.95	-176.529	-121.188	-86.0372	-58.8067	-21.4768	8.87374	45.3405	79.5205	153.978	220.323	336.539
188	-176.645	-119.941	-86.6721	-58.6268	-23.0044	11.8475	41.2452	82.3066	159.816	225.449	338.134
188.05	-177.289	-120.022	-85.9822	-59.5897	-23.7511	11.7798	37.2419	85.1709	167.816	227.743	338.322
188.1	-179.948	-121.464	-83.7703	-61.7496	-27.3082	8.84681	37.4728	87.2311	171.13	224.898	337.315
188.15	-182.852	-122.875	-81.0725	-62.6082	-32.5019	7.08123	41.0086	90.082	162.77	219.215	335.746
188.2	-183.245	-123.242	-79.2595	-61.1212	-33.8861	8.81345	43.5754	91.82	148.585	213.68	334.919
188.25	-180.781	-122.752	-80.3073	-57.9445	-29.7868	12.5612	43.5666	89.4716	141.673	210.354	335.851
188.3	-176.596	-122.221	-84.0981	-55.529	-24.1156	15.5026	43.7919	83.5874	143.13	209.381	338.625
188.35	-173.172	-122.09	-88.161	-56.1474	-20.8203	16.1844	44.8919	80.8906	146.471	209.08	341.967
188.4	-172.2	-122.227	-90.3609	-57.8552	-21.306	15.2365	44.079	86.4197	147.733	207.934	343.437
188.45	-170.784	-121.841	-89.9009	-57.1524	-24.932	12.8289	41.6696	94.0468	146.745	207.255	342.781
188.5	-166.392	-118.808	-88.2394	-54.0741	-28.4229	9.12726	41.7227	97.3378	147.644	210.243	341.905
188.55	-163.431	-112.523	-87.2078	-50.8312	-29.3446	6.05065	44.5867	96.5671	150.057	214.394	342.245
188.6	-166.366	-107.5	-86.318	-48.82	-28.8306	4.97604	45.2117	93.176	146.966	213.294	346.261
188.65	-171.058	-107.553	-84.5878	-48.6404	-27.3851	5.47108	41.1038	89.2401	140.651	206.804	352.586
188.7	-170.219	-109.66	-83.3122	-48.7562	-24.6353	7.26716	36.5947	87.4297	141.189	200.96	351.685
188.75	-163.335	-110.744	-83.7736	-46.6278	-22.6826	9.74553	36.4205	87.1265	147.165	202.82	343.611
188.8	-155.732	-112.351	-84.0545	-44.0806	-23.5493	11.3085	39.0017	86.9464	150.181	212.82	342.745
188.85	-151.99	-115.235	-82.1297	-45.2825	-26.5506	12.4778	39.1833	87.9875	148.716	222.041	349.476
188.9	-152.927	-117.694	-79.7331	-49.4876	-29.2682	14.9087	35.86	90.5988	146.837	224.853	352.369
188.95	-154.029	-119.209	-79.4457	-52.5976	-29.0738	16.2324	33.5347	92.5728	148.258	225.264	350.502
189	-151.411	-121.084	-81.1969	-53.2682	-25.6596	13.1003	34.9478	92.1119	152.638	226.89	348.375
189.05	-149.995	-123.542	-83.6459	-52.4816	-22.6134	8.19176	38.1738	89.7405	155.187	228.986	346.524
189.1	-158.127	-124.877	-85.2488	-50.8356	-24.4998	6.2038	40.4301	87.6868	152.645	229.682	344.991
189.15	-173.088	-123.517	-85.0282	-49.6541	-31.2812	7.37455	39.7678	86.3666	147.464	228.162	344.558
189.2	-182.09	-118.453	-83.9373	-49.5	-36.7491	9.92421	36.2242	84.4096	143.734	224.017	344.021
189.25	-180.272	-111.207	-84.3872	-48.11	-35.823	13.0073	32.4498	83.1426	142.642	218.505	341.486
189.3	-175.249	-109.546	-87.3789	-45.113	-29.9528	14.7277	30.7508	85.1569	142.521	215.541	336.815
189.35	-173.194	-120.499	-90.9332	-44.1566	-23.9545	12.7016	32.3652	89.6574	142.17	217.571	332.847
189.4	-173.916	-138.35	-92.8071	-46.8832	-21.8941	7.8387	36.3339	92.3239	143.968	222.923	333.272
189.45	-175.24	-149.482	-91.0387	-51.644	-23.7581	4.68599	37.6268	90.645	149.766	227.977	336.135
189.5	-175.812	-148.087	-84.0271	-56.3638	-24.9955	6.22483	34.5352	87.7624	156.489	230.313	336.936
189.55	-175.758	-139.265	-76.9475	-59.5528	-24.3828	10.6639	32.8649	87.2627	160.296	228.351	337.617
189.6	-174.717	-131.93	-78.8085	-60.7292	-25.4057	13.986	36.3916	88.6869	160.496	223.086	342.795
189.65	-173.17	-130.96	-89.3195	-60.0266	-27.4743	14.1469	42.1522	91.1225	157.786	219.808	349.342
189.7	-173.264	-133.308	-100.518	-55.9449	-27.1204	11.4983	45.4693	92.8942	153.097	221.407	349.954
189.75	-173.895	-133.247	-106.258	-46.6628	-25.5557	8.1808	44.1437	91.5483	147.517	224.329	344.051
189.8	-171.887	-130.923	-104.479	-38.1697	-25.4336	7.29189	40.0574	88.7805	142.297	224.738	338.095
189.85	-167.758	-129.54	-98.2213	-41.7692	-25.9675	9.94825	37.1255	87.9375	139.899	222.789	335.755
189.9	-164.771	-128.817	-93.6344	-56.7463	-26.3851	14.5142	37.4996	88.9802	142.355	221.638	334.724
189.95	-166.043	-127.715	-93.4776	-68.1762	-25.4093	18.968	40.157	90.1756	147.396	224.041	333.43
190	-171.631	-127.046	-95.6094	-67.6725	-19.7924	20.8276	42.1226	90.066	150.307	229.146	333.844
190.05	-177.233	-127.25	-97.0463	-62.5591	-12.0598	17.1346	41.7474	86.6534	149.656	233.656	336.47
190.1	-178.427	-127.401	-95.3834	-61.1515	-11.8797	9.37067	41.2111	80.2602	147.995	234.439	340.646
190.15	-175.808	-126.919	-89.2527	-63.4841	-22.2286	4.16852	43.3068	77.078	148.876	231.673	345.664
190.2	-173.315	-126.687	-82.3248	-65.7769	-33.6807	5.00047	47.2217	80.9942	153.294	229.453	349.045
190.25	-172.381	-127.105	-80.1463	-65.1465	-37.4999	10.0329	49.1847	86.8726	157.981	230.703	348.52
190.3	-170.343	-126.56	-82.817	-62.1351	-34.2542	17.1613	46.858	89.8701	158.553	232.075	344.083
190.35	-165.962	-124.402	-86.8956	-59.4531	-29.204	22.8618	41.5793	90.9977	154.708	228.746	337.7
190.4	-162.032	-121.992	-89.9219	-56.8078	-26.148	21.4248	37.717	91.3788	150.639	223.015	332.426
190.45	-161.145	-120.46	-91.3819	-53.0446	-25.2714	12.4391	39.0769	89.8649	151.025	219.259	331.226
190.5	-163.652	-120.729	-92.0496	-50.9693	-24.8751	3.1458	45.0518	86.1552	155.662	216.965	333.735
190.55	-168.037	-123.382	-92.7471	-53.8303	-25.8309	-0.546062	53.3726	82.6165	159.133	215.43	336.418
190.6	-171.009	-126.663	-93.8561	-60.6055	-30.1831	0.271276	61.2394	81.2706	159.487	215.602	337.987
190.65	-171.333	-127.408	-94.2205	-66.2997	-34.7187	1.48891	62.7522	81.9547	160.359	217.437	340.221
190.7	-171.831	-125.101	-92.5615	-66.4482	-35.1653	0.778649	54.0064	84.6109	161.936	219.816	341.74
190.75	-174.257	-122.821	-90.5552	-62.0064	-32.5149	-0.186084	41.3088	89.0168	160.245	221.146	339.075
190.8	-177.513	-122.278	-90.1855	-57.1438	-29.5416	1.51538	34.6976	93.9378	155.101	219.876	332.724
190.85	-181.111	-122.241	-90.2886	-54.7172	-27.4134	5.48436	35.5779	99.3368	151.178	216.604	326.191
190.9	-184.283	-123.08	-89.1713	-55.7587	-26.7899	8.88471	37.4738	104.849	151.162	213.956	320.827
190.95	-183.093	-126.167	-87.7463	-58.9122	-28.3088	10.1757	36.1479	105.725	152.203	212.343	317.854
191	-174.014	-129.122	-88.5766	-60.4551	-31.4608	9.54375	32.846	97.4869	152.281	211.274	319.312
191.05	-162.015	-130.366	-92.3359	-58.625	-33.781	8.76227	29.6121	84.6263	153.963	212.776	323.865
191.1	-157.832	-133.201	-95.6912	-55.2044	-32.3312	9.51802	26.6589	76.2677	158.669	218.261	327.748
191.15	-163.121	-138.167	-95.2987	-52.5958	-27.3349	10.7991	24.4827	75.0003	162.925	223.813	330.316
191.2	-169.623	-137.705	-92.349	-51.7717	-22.2314	10.3101	25.8587	77.2212	162.246	222.651	332.297
191.25	-172.559	-127.528	-90.0818	-52.5984	-20.1783	7.31598	31.5977	79.4187	155.465	215.201	332.416
191.3	-173.539	-116.171	-89.4374	-53.8515	-22.0062	3.64462	38.1664	80.2984	146.799	210.515	331.38
191.35	-174.654	-114.036	-91.0651	-54.5451	-26.098	2.06716	42.1666	80.7086	141.685	213.266	332.231
191.4	-175.023	-118.917	-96.7845	-56.2992	-29.3155	2.77922	42.4493	81.7812	140.284	220.624	334.717
191.45	-171.997	-121.984	-104.088	-60.8148	-29.9379	4.37888	39.4398	82.1088	140.009	228.671	335.235
191.5	-165.502	-121.144	-106.122	-66.2082	-29.9107	6.0449	35.8031	81.127	140.068	232.238	332.417
191.55	-159.858	-120.733	-100.831	-69.0232	-31.3338	6.37517	33.7028	80.8232	140.09	227.146	328.547
191.6	-158.809	-123.197	-93.1437	-69.0274	-31.9967	4.40421	33.6636	81.5	140.448	216.791	328.223
191.65	-160.607	-126.121	-87.168	-68.5533	-29.6464	2.06888	36.4921	81.6856	142.858	208.612	333.467
191.7	-160.694	-126.199	-83.5801	-67.934	-27.1265	1.73584	40.6641	80.9634	146.975	204.835	339.948
191.75	-157.52	-123.605	-83.8045	-64.144	-27.9989	3.4369	43.0042	81.3642	151.544	201.542	343.004
191.8	-154.496	-122.131	-88.6256	-56.7238	-31.1782	6.01361	43.6663	85.2569	156.144	198.541	340.888
191.85	-155.983	-123.958	-93.8645	-50.6533	-33.4112	8.56114	44.8974	90.4969	158.91	200.572	333.748
191.9	-160.668	-126.276	-95.5948	-49.9583	-34.406	10.5977	45.7355	93.1765	158.918	207.625	326.107
191.95	-163.178	-126.783	-95.0068	-53.6936	-35.8104	11.3662	44.3846	92.6085	157.843	214.266	323.202
192	-162.409	-126.599	-93.8432	-58.4042	-34.0994	9.89177	42.6407	90.674	155.774	216.244	325.212
192.05	-162.03	-125.804	-92.5321	-60.8628	-24.1428	6.18815	42.3577	89.4072	151.143	215.688	329.015
192.1	-163.577	-124.047	-91.6785	-60.4133	-11.9804	0.960192	41.9529	88.6476	145.437	216.521	332.066
192.15	-165.105	-123.091	-92.1792	-59.284	-9.21751	-5.30041	40.4746	86.5713	142.597	217.981	333.201
192.2	-165.385	-123.443	-96.0652	-58.3565	-15.9572	-11.071	40.1579	83.6711	143.501	217.893	332.339
192.25	-165.605	-123.669	-102.121	-55.9046	-23.5906	-12.0448	40.956	81.6543	144.954	215.249	329.922
192.3	-166.862	-123.429	-103.258	-52.5086	-27.1752	-5.26742	39.8137	81.3935	144.868	210.51	326.462
192.35	-169.367	-122.529	-97.1629	-52.1714	-26.5644	4.72646	36.9194	82.9977	145.202	206.821	323.823
192.4	-173.02	-120.821	-89.6535	-55.4498	-24.2796	10.2089	34.1978	85.3009	147.735	206.548	323.522
192.45	-175.807	-120.107	-85.0625	-60.241	-23.7083	10.1556	30.9683	86.7666	151.394	208.639	325.282
192.5	-176.66	-121.172	-83.9959	-64.9176	-25.1013	8.02566	29.0251	87.7034	154.952	211.908	328.651
192.55	-177.347	-122.147	-86.91	-65.9048	-25.6902	5.53316	34.3027	88.7201	157.348	216.633	333.327
192.6	-178.726	-123.368	-92.3774	-61.1982	-24.886	4.30781	46.3446	88.3974	156.929	222.139	337.946
192.65	-178.722	-127.218	-97.7853	-54.2247	-24.0692	5.81844	55.0206	85.2465	153.295	225.333	339.9
192.7	-174.609	-131.127	-101.691	-48.8263	-23.4397	8.42508	53.6703	79.9578	148.754	224.162	338.185
192.75	-168.647	-130.496	-103.2	-47.7876	-22.6103	9.83316	47.8474	74.2216	146.382	221.277	335.401
192.8	-166.508	-126.151	-101.906	-52.0156	-21.6459	9.757	45.2261	71.0463	146.78	220.938	334.83
192.85	-167.724	-122.96	-100.308	-58.2815	-22.3103	8.14436	46.0767	74.8822	148.398	223.581	336.907
192.9	-167.566	-123.798	-101.549	-61.6951	-27.2962	5.23766	46.4137	85.389	149.961	226.276	340.092
192.95	-166.167	-126.3	-104.048	-60.4096	-34.6502	2.73113	43.6626	94.908	149.757	227.972	342.803
193	-166.199	-126.418	-103.747	-58.4317	-37.9949	1.39996	39.4879	98.1531	146.109	230.064	343.454
193.05	-166.493	-124.761	-100.2	-60.7483	-34.4681	1.15948	37.669	97.0349	141.348	230.456	341.349
193.1	-164.128	-123.388	-96.4725	-65.5327	-28.151	1.83467	38.1845	93.765	141.263	225.244	339.024
193.15	-159.842	-122.871	-94.2051	-67.1287	-24.6762	1.77982	38.0292	88.598	148.876	216.932	339.604
193.2	-157.708	-123.431	-92.6712	-64.8557	-24.2564	-0.421575	37.4829	83.5161	159.062	211.469	343.202
193.25	-159.744	-123.677	-91.9758	-62.423	-23.271	-3.09994	37.9055	80.5433	162.621	208.533	348.337
193.3	-163.047	-122.836	-92.6759	-61.7901	-21.0199	-3.7286	37.4135	80.2031	158.373	204.099	352.015
193.35	-164.576	-123.735	-93.874	-62.4314	-19.5542	-2.16765	35.7045	83.4101	153.605	200.602	351.568
193.4	-164.826	-126.572	-94.6423	-63.6162	-19.6873	0.5708	36.6143	89.6369	153.051	206.643	349.084
193.45	-165.204	-126.713	-95.3932	-63.1155	-21.5075	3.7015	40.3104	93.6677	154.975	222.537	348.047
193.5	-165.939	-122.696	-96.5662	-59.8494	-24.3881	5.05034	42.6794	91.7098	154.691	235.658	346.254
193.55	-166.946	-117.752	-97.7175	-56.8832	-25.3414	4.10462	42.7802	85.8036	150.419	237.425	339.957
193.6	-167.503	-114.783	-96.9827	-57.223	-23.8313	3.72733	42.6113	81.1325	146.366	233.164	332.512
193.65	-166.749	-115.127	-94.2343	-61.2007	-23.2773	3.94238	42.889	80.6875	146.648	228.927	333.155
193.7	-165.699	-117.821	-92.7863	-67.5287	-24.9097	2.31456	43.3657	81.5679	149.112	224.117	345.341
193.75	-165.446	-121.47	-93.5489	-72.025	-26.7231	1.19978	43.1409	80.5638	148.464	218.214	359.559
193.8	-165.752	-127.25	-93.5766	-71.1892	-28.4668	4.20369	41.7778	79.469	144.192	212.654	363.971
193.85	-165.998	-133.594	-92.2584	-68.176	-30.3717	9.4169	40.8503	79.233	140.187	209.232	359.701
193.9	-166.731	-134.461	-92.3557	-67.6676	-31.2374	12.1255	41.6072	79.5662	139.924	211.126	354.885
193.95	-168.422	-129.254	-94.3117	-68.7756	-29.9634	10.3397	41.8818	81.5759	145.024	218.558	351.752
194	-168.299	-125.062	-94.7822	-67.8274	-26.7631	6.45911	38.665	85.6237	152.879	225.332	349.033
194.05	-163.862	-125.906	-92.8078	-63.8468	-24.0813	3.79302	33.4825	90.1873	157.418	225.183	347.199
194.1	-158.62	-128.2	-92.5383	-59.5758	-23.9707	2.57293	30.606	91.6455	154.86	219.097	346.662
194.15	-157.807	-127.697	-95.4337	-58.7358	-24.8436	1.95798	31.4211	88.5152	145.975	212.815	346.68
194.2	-161.532	-125.063	-96.9486	-61.2553	-23.6641	1.54551	33.3383	84.7017	136.5	209.658	347.075
194.25	-166.177	-124.117	-95.4961	-62.8102	-20.9786	1.24484	33.4328	82.7504	133.193	209.154	346.957
194.3	-168.676	-126.63	-93.7876	-61.1286	-19.6056	1.82962	32.9421	80.6833	136.604	209.898	343.59
194.35	-167.601	-129.243	-93.5661	-60.2412	-20.2542	3.14024	34.9028	78.4304	142.159	210.443	337.909
194.4	-162.474	-127.9	-93.9554	-62.8446	-20.6565	4.33859	37.3603	78.4512	145.807	209.314	334.956
194.45	-156.288	-124.171	-93.0146	-64.2	-19.9873	5.10821	36.9956	79.6673	146.527	206.648	336.996
194.5	-155.093	-122.048	-90.9272	-61.8867	-20.5748	5.43507	35.3131	78.9596	145.747	204.391	341.626
194.55	-159.412	-122.751	-90.4699	-60.2367	-22.5291	5.30502	34.6788	77.8745	144.114	204.418	344.529
194.6	-165.122	-125.483	-92.5275	-60.8573	-22.5855	3.59131	35.0907	78.3473	141.844	207.188	343.699
194.65	-170.796	-129.126	-94.418	-60.5912	-20.8203	-0.391613	35.9598	76.4347	140.607	211.281	341.537
194.7	-175.201	-133.068	-93.2692	-58.4268	-20.8133	-3.60123	36.6312	71.0278	141.5	213.634	340.527
194.75	-176.568	-136.782	-89.1987	-56.6482	-23.0007	-3.09784	36.5612	68.7993	143.646	213.068	340.491
194.8	-175.557	-139.592	-85.1747	-56.5252	-24.5266	-0.900234	36.2333	72.6852	146.735	211.987	340.714
194.85	-173.997	-139.766	-84.0976	-57.6968	-23.963	0.539912	36.0156	77.7809	150.429	212.203	341.431
194.9	-173.738	-135.678	-86.4197	-60.0708	-23.2953	1.6301	35.6882	80.274	152.609	212.972	343.211
194.95	-174.584	-129.483	-89.3993	-63.2787	-24.7	1.53419	33.6397	81.796	151.747	213.066	345.216
195	-173.876	-124.052	-89.2838	-64.8241	-27.1724	-2.07551	30.1087	84.723	149.756	212.102	344.937
195.05	-171.884	-120.015	-87.9965	-63.9813	-28.1983	-8.46667	29.9056	87.3125	149.773	211.363	340.828
195.1	-172.191	-118.551	-90.0273	-63.0623	-28.0829	-11.897	34.3989	85.5065	152.438	212.243	334.653
195.15	-175.435	-118.988	-94.0758	-61.8723	-28.976	-8.46073	37.536	79.2953	155.574	212.131	330.855
195.2	-177.978	-118.78	-97.2213	-59.0819	-30.1008	-2.32308	36.2321	74.1573	155.66	208.061	331.399
195.25	-177.121	-119.457	-99.6986	-57.4567	-29.6152	1.47801	34.7638	73.008	152.543	204.125	332.702
195.3	-175.823	-122.268	-101.824	-59.2597	-29.5736	4.18332	36.6407	72.5808	150.483	204.494	331.596
195.35	-177.032	-124.814	-101.944	-62.2707	-31.51	7.19334	40.2052	70.4301	150.985	205.526	330.576
195.4	-178.662	-126.954	-100.106	-63.0255	-33.0321	7.60086	40.856	69.378	150.434	204.165	332.927
195.45	-178.919	-130.112	-98.0336	-60.0644	-32.3841	4.17616	37.9344	71.2648	147.442	203.453	337.414
195.5	-177.56	-130.169	-94.9744	-56.4846	-30.2485	0.996553	36.1564	74.3695	145.855	205.908	341.481
195.55	-172.32	-124.942	-91.0893	-56.4789	-28.4533	1.73921	37.5509	77.9033	147.396	210.007	343.303
195.6	-164.151	-120.397	-89.5597	-58.0995	-27.4456	3.76356	39.1147	81.2405	148.461	213.861	341.859
195.65	-159.294	-121.379	-89.8498	-56.8208	-25.9901	2.3421	38.3321	81.9731	146.262	216.478	339.234
195.7	-158.567	-125.667	-89.7957	-52.7025	-24.1844	-1.36375	36.169	79.9009	142.419	216.045	336.468
195.75	-157.936	-129.234	-89.8631	-49.2187	-21.8604	-2.28289	34.7507	78.2686	140.204	211.754	332.712
195.8	-156.948	-130.305	-89.7212	-49.8899	-19.6988	0.814882	34.388	79.4849	140.269	206.888	330.581
195.85	-159.289	-130.434	-87.4223	-53.9088	-20.6994	4.14108	34.5341	81.8535	141.174	205.265	333.585
195.9	-167.652	-130.335	-82.6335	-57.2764	-24.4962	4.95751	35.2913	82.1152	143.226	207.878	339.757
195.95	-175.517	-128.115	-78.8513	-59.8756	-27.7654	4.66261	36.4235	80.1822	147.756	213.472	344.305
196	-173.188	-126.058	-79.6356	-61.1114	-28.8352	5.69582	36.875	78.8863	152.907	218.412	346.288
196.05	-165.949	-128.084	-83.0143	-58.067	-26.6466	7.1116	35.827	77.7973	155.163	218.767	347.54
196.1	-165.533	-131.724	-85.7783	-53.7276	-22.7275	6.28161	33.5943	74.59	153.2	215.293	347.694
196.15	-168.841	-134.2	-86.4649	-52.4461	-22.8005	5.27567	31.5318	71.4121	148.386	212.476	345.223
196.2	-168.914	-134.397	-84.3328	-53.3144	-28.1354	7.82592	31.1556	73.0745	143.212	211.773	341.328
196.25	-168.523	-128.547	-84.2015	-54.8312	-31.607	12.3912	32.6543	78.7332	139.297	210.93	339.07
196.3	-171.208	-120.756	-91.3678	-55.6673	-29.5076	14.818	36.0134	82.8844	137.557	208.828	339.311
196.35	-173.449	-122.059	-102.035	-55.6783	-26.8562	12.2841	40.1758	83.6105	138.35	206.012	339.51
196.4	-171.996	-130.082	-110.31	-57.9323	-26.1064	5.37968	41.7264	83.6765	139.275	203.606	338.309
196.45	-169.628	-135.942	-113.42	-61.961	-24.8288	-0.610288	39.2202	85.1447	138.288	202.953	337.401
196.5	-168.708	-138.381	-108.308	-62.8947	-23.2211	-3.10351	35.1205	86.9191	135.893	203.854	337.887
196.55	-169.005	-136.865	-98.4535	-60.6024	-22.3961	-3.66851	31.7306	86.3358	132.668	205.197	338.209
196.6	-169.777	-130.382	-93.6012	-59.7766	-22.2576	-0.543699	30.941	83.4253	129.413	206.728	335.462
196.65	-169.953	-123.269	-93.8728	-61.3056	-23.3988	6.85252	32.5203	81.2707	127.285	207.469	330.658
196.7	-169.501	-120.323	-92.1968	-60.0993	-25.1543	12.2312	32.3465	80.7369	126.782	206.508	328.618
196.75	-169.218	-120.374	-86.8821	-52.4821	-26.7046	10.3035	28.886	81.1032	128.464	206.974	328.919
196.8	-169.753	-120.735	-82.8505	-42.9684	-29.7854	3.38005	26.1653	83.4903	131.878	210.685	326.815
196.85	-171.101	-121.123	-86.6714	-40.0292	-34.0012	-0.964916	27.6088	87.4249	136.476	213.154	322.376
196.9	-171.759	-121.483	-96.3664	-44.2195	-35.0163	0.45706	31.6974	89.9084	142.419	210.845	320.002
196.95	-170.624	-121.671	-102.305	-50.5067	-32.1011	1.77805	33.9011	89.889	146.86	207.02	322.125
197	-169.042	-123.31	-99.8245	-56.0949	-28.6718	-1.62286	32.4833	87.358	147.921	207.012	327.731
197.05	-168.453	-125.616	-93.0016	-59.5501	-25.7885	-5.96841	30.4854	84.2305	148.788	211.069	333.127
197.1	-167.821	-124.616	-87.5745	-61.5083	-23.5709	-9.02094	29.7954	84.4163	152.381	214.488	335.786
197.15	-166.677	-120.628	-85.9134	-62.9262	-24.8273	-13.5404	31.2708	86.1546	156.117	214.945	337.102
197.2	-166.434	-119.215	-86.1961	-62.0426	-29.6823	-19.2297	35.7099	85.3106	154.658	214.442	339.139
197.25	-166.35	-122.802	-86.5237	-59.238	-33.8532	-20.0036	39.9656	84.1349	149.03	213.538	341.504
197.3	-164.439	-127.889	-87.6616	-57.1227	-34.624	-10.9443	42.0681	86.2944	146.226	210.513	343.053
197.35	-161.37	-130.617	-89.0569	-54.6729	-33.5926	2.82347	43.6437	90.2905	147.784	206.969	342.611
197.4	-160.116	-130.26	-89.7877	-52.2802	-32.1831	9.94331	44.0657	92.1953	149.455	207.345	339.769
197.45	-161.163	-128.334	-92.1163	-53.4349	-30.1049	8.02157	42.4165	92.2691	150.167	212.631	336.582
197.5	-161.645	-126.846	-97.774	-58.2672	-29.9666	2.85841	38.5657	92.8372	151.161	217.479	335.863
197.55	-160.751	-126.522	-103.705	-63.2138	-35.1204	-2.28737	33.4245	91.9348	152.295	215.962	338.908
197.6	-161.402	-126.7	-105.924	-66.0406	-40.9574	-8.27544	31.769	87.349	153.394	210.775	343.66
197.65	-165.564	-126.456	-104.36	-66.9581	-40.5034	-13.9762	35.773	80.6814	153.17	208.456	345.749
197.7	-169.708	-125.33	-100.604	-66.0467	-35.1302	-13.8682	39.3443	74.1834	151.556	209.243	344.077
197.75	-169.076	-123.182	-96.4001	-63.2678	-30.9375	-6.49539	40.0135	71.1663	150.206	210.077	340.808
197.8	-165.958	-120.223	-93.5966	-60.1271	-29.7383	1.22842	40.9904	71.8108	148.738	211.454	337.613
197.85	-165.592	-118.134	-91.3777	-58.7108	-29.0771	3.14775	43.2584	73.9389	148.135	213.766	337.119
197.9	-167.906	-118.731	-88.8962	-58.984	-28.1038	0.771414	44.5872	78.7145	150.46	213.644	339.103
197.95	-169.544	-120.818	-87.3973	-60.1289	-27.9661	-3.22122	44.2764	84.8715	151.939	209.661	340.272
198	-169.146	-122.843	-86.663	-62.1663	-28.7355	-6.89715	43.7888	89.1848	148.988	205.069	339.959
198.05	-167.454	-125.113	-85.6654	-64.4922	-30.2767	-7.5507	43.4103	91.8236	143.898	202.604	337.586
198.1	-165.215	-126.671	-84.3389	-65.3423	-32.1256	-5.10433	42.4679	90.098	141.311	204.017	333.271
198.15	-163.566	-126.742	-82.9371	-64.432	-32.5403	-2.72963	42.0593	81.8529	146.066	209.55	330.114
198.2	-165.341	-127.161	-82.1805	-62.5766	-30.8821	-1.62204	42.3355	73.2106	155.525	215.11	328.619
198.25	-171.148	-128.96	-82.9681	-60.8692	-28.2711	0.982816	42.0293	70.6738	157.829	218.243	328.04
198.3	-177.164	-129.071	-85.4617	-60.3403	-25.4447	6.1309	41.6183	74.0096	150.468	219.445	328.862
198.35	-180.071	-124.715	-88.9501	-60.857	-22.4919	8.88	42.2551	77.9956	141.755	217.776	328.201
198.4	-178.858	-119.165	-92.8576	-62.3123	-20.6833	5.92252	43.4341	78.1203	137.479	215.645	324.088
198.45	-175.668	-118.621	-96.8422	-65.0462	-22.1875	1.6369	43.9991	76.9503	137.402	216.034	319.587
198.5	-174.029	-124.516	-98.9429	-66.9987	-26.9161	0.329014	43.029	78.6794	137.679	217.449	316.658
198.55	-174.124	-132.337	-97.9058	-66.4869	-31.2209	-0.349714	40.2398	81.5135	137.728	219.336	315.837
198.6	-174.575	-135.249	-95.0266	-65.3753	-31.6106	-1.72503	37.5063	81.8216	140.578	222.717	317.275
198.65	-174.641	-130.586	-92.7054	-64.8122	-29.0037	-0.432185	36.4376	79.5781	144.777	224.415	319.869
198.7	-173.108	-121.892	-91.38	-62.7999	-26.5583	3.51505	36.0336	77.0729	144.547	221.715	325.343
198.75	-169.498	-114.412	-89.2044	-59.0664	-25.7134	4.82474	34.975	76.6506	140.789	216.122	334.723
198.8	-165.648	-111.406	-88.012	-55.9034	-26.9064	1.32856	33.7288	78.681	138.699	209.224	341.589
198.85	-163.713	-113.674	-90.9098	-52.9909	-29.5468	-2.70107	33.1785	82.0585	137.844	203.919	341.765
198.9	-163.989	-118.433	-94.6427	-49.8617	-30.6225	-2.94325	33.584	85.048	136.319	203.947	338.837
198.95	-167.413	-121.712	-94.8978	-50.6348	-29.2052	-1.39157	35.2894	86.3625	135.57	208.001	337.532
199	-175.713	-122.976	-93.47	-56.4875	-28.1607	-2.42732	37.584	86.0364	136.096	212.839	339.927
199.05	-183.063	-123.92	-92.5898	-62.6715	-29.8891	-5.40739	38.8616	84.4366	136.664	218.507	344.194
199.1	-179.605	-124.225	-92.1725	-65.9318	-33.3049	-6.86368	38.7107	84.0062	137.323	223.554	347.231
199.15	-167.591	-123.606	-93.2793	-65.3664	-35.3619	-6.93533	37.4298	88.165	138.663	223.376	349.017
199.2	-159.136	-125.744	-95.3337	-61.7715	-35.2879	-7.4766	34.8954	94.3614	140.144	216.922	351.128
199.25	-158.899	-133.257	-94.8364	-57.81	-33.4806	-8.76122	32.8134	95.6471	141.504	209.547	352.162
199.3	-162.605	-139.985	-91.9687	-54.9917	-29.7983	-9.83346	34.7272	91.1989	143.712	206.876	349.043
199.35	-166.171	-137.037	-91.0867	-53.6504	-25.8633	-9.17216	38.9209	86.9985	146.524	208.518	341.902
199.4	-168.243	-126.921	-93.9083	-55.39	-23.3686	-6.5017	40.1297	86.7086	148.205	211.15	335.733
199.45	-168.149	-120.257	-98.9217	-60.6756	-21.0179	-3.67235	38.518	88.4361	147.881	213.091	334.593
199.5	-165.991	-119.988	-105.595	-65.9433	-19.7578	-1.83593	37.0588	89.2923	145.9	214.428	336.124
199.55	-162.779	-120.61	-112.669	-67.7436	-22.635	-0.332027	36.2214	88.4733	143.722	216.197	336.252
199.6	-159.747	-120.219	-113.925	-67.7883	-27.3669	-0.102437	36.6234	85.9177	142.78	218.931	335.286
199.65	-158.656	-121.164	-104.372	-68.9126	-29.016	-2.8135	38.5986	81.1301	142.232	220.734	335.172
199.7	-161.859	-123.059	-90.607	-70.1278	-26.9879	-5.63747	39.2177	76.3322	140.758	219.902	335.424
199.75	-168.129	-123.631	-83.5342	-69.7609	-23.9748	-3.75838	36.5938	76.5949	139.692	217.247	334.585
199.8	-172.931	-122.541	-85.1138	-68.558	-23.0218	2.42049	34.3358	81.3411	140.034	214.154	333.226
199.85	-174.737	-121.128	-89.4901	-66.583	-25.1426	8.51641	36.9544	83.7856	141.092	211.402	334.021
199.9	-174.87	-120.99	-91.5184	-62.0693	-27.9707	11.4329	42.2605	81.5929	143.221	209.575	337.627
199.95	-172.76	-123.398	-90.9492	-55.6913	-29.6171	10.045	44.8706	79.1677	146.769	209.533	341.001
200	-168.759	-126.621	-91.0992	-51.457	-32.6306	6.30422	43.9606	80.121	148.928	210.933	341.81
200.05	-165.584	-127.449	-94.876	-51.6389	-39.2303	4.53137	41.4249	82.665	147.779	211.173	341.37
200.1	-164.641	-126.502	-99.8451	-53.6366	-43.8499	5.71821	38.3711	82.9479	145.447	209.145	341.997
200.15	-165.57	-126.064	-101.293	-53.9718	-38.8449	6.59236	36.0198	79.8885	143.116	206.963	344.34
200.2	-166.949	-124.971	-100.715	-52.2559	-27.2013	3.91925	35.2454	76.9089	139.542	206.224	346.861
200.25	-167.519	-121.61	-101.667	-49.8647	-18.5429	-1.94706	36.617	79.1389	137.279	206.39	346.486
200.3	-166.76	-117.935	-102.08	-48.9743	-16.7251	-7.40126	40.2026	86.365	140.605	206.519	341.52
200.35	-166.099	-117.627	-100.289	-51.0731	-19.2451	-8.36378	44.6224	90.6951	147.929	205.632	336.418
200.4	-169.302	-121.59	-98.5257	-53.9331	-22.814	-1.63431	47.9909	87.7303	155.01	203.273	336.612
200.45	-175.521	-124.874	-97.7925	-54.6535	-25.767	11.7164	48.5428	82.7189	160.032	201.888	339.531
200.5	-178.044	-122.401	-97.8348	-54.0864	-26.3005	23.8446	45.3543	81.1781	161.948	204.554	339.487
200.55	-174.776	-117.188	-97.0799	-54.4264	-23.2733	26.4013	38.9859	81.7111	160.21	211.884	336.329
200.6	-170.632	-115.512	-93.4726	-56.2491	-19.2053	19.1398	31.3262	80.8603	155.191	220.917	333.235
200.65	-168.288	-118.552	-88.5274	-58.2272	-17.3279	10.1283	26.3777	79.4233	148.361	226.025	332.658
200.7	-165.416	-123.003	-84.9061	-58.0752	-18.2456	6.07262	28.0413	79.5774	143.6	223.298	334.409
200.75	-161.17	-125.621	-83.8616	-56.5672	-20.3256	5.83859	35.1532	80.0938	143.808	215.067	337.39
200.8	-158.446	-125.955	-85.8981	-56.934	-20.7768	6.18112	41.8665	78.1516	147.344	208.088	341.823
200.85	-157.973	-124.709	-88.237	-58.5877	-19.9745	5.65995	43.8355	72.4874	150.128	206.731	347.344
200.9	-157.729	-122.123	-88.2592	-58.4315	-21.6158	4.40193	41.7487	65.3877	150.063	207.996	351.372
200.95	-160.135	-119.335	-88.2181	-56.4476	-25.4191	4.11281	39.7608	63.6063	147.466	206.713	352.799
201	-168.664	-118.32	-89.5552	-54.8059	-27.3473	4.37686	40.7276	72.2093	144.196	203.774	352.493
201.05	-178.182	-118.907	-89.3003	-54.1275	-26.2143	3.16787	43.3369	86.2069	143.615	203.907	351.295
201.1	-181.008	-117.731	-85.9932	-53.3146	-24.1557	2.02817	44.5496	95.2809	144.64	207.98	351.214
201.15	-177.967	-112.275	-83.2419	-52.3859	-23.1411	2.21962	43.3005	95.323	141.885	212.289	353.499
201.2	-175.282	-107.175	-84.3675	-52.7955	-22.7976	2.18006	40.731	89.5427	136.476	213.207	355.533
201.25	-175.307	-110.084	-86.563	-53.3934	-21.3403	2.89691	37.6163	83.2416	136.332	211.402	355.55
201.3	-175.95	-119.251	-85.28	-51.2933	-19.4076	5.69034	34.5513	80.6756	144.079	210.735	354.958
201.35	-175.509	-125.004	-80.7884	-47.1321	-20.2337	8.70238	34.2618	82.3158	153.638	211.972	354.194
201.4	-174.501	-124.4	-75.6898	-44.6048	-23.8948	10.9849	37.535	84.3906	158.042	211.332	352.118
201.45	-173.367	-122.947	-72.3214	-45.8255	-27.2501	11.6995	40.9206	84.4944	156.515	207.163	349.878
201.5	-170.719	-123.562	-74.6093	-49.5318	-28.3646	8.90582	43.8119	84.6231	154.117	204.114	349.956
201.55	-164.985	-124.622	-83.6087	-52.7893	-27.2166	3.70178	47.8194	85.312	154.458	207.942	352.066
201.6	-158.118	-125.149	-92.7533	-52.6788	-25.4692	-0.0827603	50.2289	84.891	155.332	217.219	353.199
201.65	-154.541	-124.642	-95.8712	-48.0876	-25.4531	0.142903	47.5573	85.0038	153.746	224.465	349.748
201.7	-155.479	-123.016	-94.0846	-43.7485	-26.7912	3.10471	41.5247	86.905	149.646	225.425	339.839
201.75	-158.695	-122.772	-90.1894	-46.5496	-26.2172	4.56884	36.9306	88.0413	145.986	222.086	327.406
201.8	-161.968	-125.198	-86.0985	-55.0858	-21.9436	3.57594	36.5123	87.5834	146.544	218.564	321.787
201.85	-163.285	-128.016	-84.1777	-61.045	-15.6752	3.92634	38.6945	86.6616	150.16	217.391	327.313
201.9	-161.195	-129.799	-84.6265	-61.1348	-10.1468	7.64397	40.4413	84.6592	153.021	218.642	338.869
201.95	-158.017	-130.065	-86.3311	-59.0367	-8.49878	12.2302	41.1464	82.3008	153.602	220.1	349.435
202	-157.446	-127.812	-90.6324	-57.7047	-15.0475	14.4423	40.9788	81.9391	150.823	219.749	354.898
202.05	-158.823	-123.736	-96.3957	-57.4581	-28.2516	13.04	39.4738	83.5906	146.781	218.76	353.982
202.1	-159.949	-119.943	-97.797	-58.9805	-38.5615	10.2043	37.3405	84.8521	147.476	218.625	349.254
202.15	-162.029	-118.139	-93.744	-61.519	-40.3213	11.1419	35.3328	84.3321	153.469	217.38	345.143
202.2	-165.148	-119.1	-88.9706	-61.6341	-37.4895	17.6161	34.0894	84.2307	158.364	214.996	343.027
202.25	-166.308	-122.663	-87.1143	-59.1878	-34.6124	23.3611	35.4382	87.5738	158.293	213.385	342.026
202.3	-164.091	-126.41	-89.2551	-58.1289	-31.2179	20.9543	39.5893	91.9846	155.073	210.508	343.428
202.35	-159.988	-128.332	-93.5651	-58.8149	-25.9315	12.0763	44.267	92.851	152.104	205.583	347.688
202.4	-156.723	-129.872	-96.2229	-57.8463	-19.8018	5.34045	48.8891	89.5713	151.572	202.092	350.613
202.45	-156.81	-131.489	-96.204	-53.9583	-15.2684	3.99235	54.2768	85.1927	153.639	202.066	349.345
202.5	-159.556	-130.788	-94.6174	-48.7799	-15.3739	3.56921	58.0609	83.2465	156.749	205.344	346.824
202.55	-160.907	-127.733	-92.3957	-45.2849	-21.0615	1.742	55.6634	84.7487	158.635	209.708	346.039
202.6	-158.194	-123.749	-90.4023	-45.7131	-27.9096	0.343661	47.0073	87.6257	158.826	212.434	346.819
202.65	-154.071	-119.175	-90.6344	-49.5496	-30.7036	0.396454	38.3286	89.1522	159.448	213.674	348.602
202.7	-154.141	-115.723	-94.6575	-53.3942	-29.0808	2.08494	34.9842	89.4124	160.862	213.368	350.393
202.75	-159.415	-115.299	-100.088	-52.9988	-26.3471	4.82855	35.7811	90.327	160.158	210.097	351.814
202.8	-164.233	-118.183	-102.296	-48.4956	-25.1209	5.99663	37.4533	91.5354	156.491	206.653	353.783
202.85	-165.029	-123.507	-99.6595	-45.1245	-25.4703	4.79607	39.9029	88.5419	152.603	207.106	354.395
202.9	-164.76	-128.657	-95.0312	-48.2545	-24.8279	4.2209	43.2957	78.7575	151.067	209.628	351.688
202.95	-165.436	-130.794	-92.8431	-57.5751	-20.8236	5.99554	45.415	68.1042	153.437	210.616	348.201
203	-164.951	-129.703	-93.4014	-65.8121	-15.6667	7.91788	44.9263	65.4736	160.305	210.403	346.157
203.05	-162.46	-127.608	-93.2631	-67.3155	-14.7773	7.13123	41.5461	69.9765	168.229	209.565	344.709
203.1	-160.483	-126.043	-91.6991	-64.4775	-18.7347	4.08894	35.2601	74.5348	171.059	208.621	342.654
203.15	-160.783	-123.836	-90.358	-62.1842	-23.1035	2.12873	29.4453	78.0074	165.991	210.375	339.625
203.2	-162.165	-120.784	-89.7114	-61.5382	-24.6989	3.41284	28.3567	82.1312	156.047	215.084	336.711
203.25	-163.254	-119.194	-90.1263	-61.0413	-22.875	5.80021	31.4549	85.9085	148.124	219.557	335.797
203.3	-163.32	-119.519	-91.1134	-60.501	-20.5798	6.33939	35.5605	87.6656	146.208	223.314	336.808
203.35	-161.371	-119.323	-90.8657	-59.8357	-22.3741	7.08029	38.3811	87.3414	147.056	226.704	337.135
203.4	-157.892	-118.708	-89.2929	-58.2369	-27.0437	10.2015	39.7837	86.9924	146.218	224.757	335.625
203.45	-154.892	-119.474	-87.6479	-56.834	-28.7007	10.9264	41.683	88.1263	144.22	212.775	335.435
203.5	-154.138	-120.971	-86.8275	-57.9325	-26.6472	6.89062	43.8119	88.3363	145.047	198.282	340.698
203.55	-154.792	-121.224	-87.0258	-60.7618	-25.5408	4.02271	42.8595	84.9708	148.995	194.709	351.309
203.6	-154.716	-119.249	-87.1389	-62.3706	-25.5152	4.58548	38.8103	79.6916	150.435	201.406	361.721
203.65	-154.895	-116.012	-85.993	-60.6824	-23.2305	4.81772	36.6088	75.9672	147.217	206.871	364.512
203.7	-156.515	-114.896	-83.5862	-55.6779	-19.5837	4.18305	38.3427	74.5513	144.409	209.031	356.505
203.75	-157.75	-116.993	-80.2912	-50.4687	-17.4654	4.43772	40.661	75.2276	145.039	213.17	343.368
203.8	-157.749	-119.06	-77.6889	-48.4612	-17.1014	4.94334	41.4551	79.661	147.174	218.777	334.959
203.85	-157.297	-118.474	-78.5838	-49.2919	-17.522	5.19523	41.6674	87.3931	150.744	222.125	335.172
203.9	-157.251	-116.614	-82.4664	-50.8185	-17.8194	6.26594	41.3768	92.5089	155.571	221.048	339.65
203.95	-159.356	-116.57	-84.6907	-51.9146	-17.2856	8.54127	40.2903	91.3622	158.335	215.619	343.199
204	-163.643	-118.733	-83.7924	-51.5112	-16.1847	10.7095	40.2513	88.1023	157.586	210.558	343.962
204.05	-167.501	-120.743	-83.1572	-49.1743	-16.3807	10.5651	42.1818	87.3904	155.541	210.499	341.992
204.1	-169.735	-121.499	-84.0306	-46.3954	-18.9524	8.12602	43.7019	88.3196	153.746	213.365	339.5
204.15	-170.724	-122.132	-83.1577	-45.1217	-22.2274	5.98415	43.7299	87.8215	153.246	215.431	339.191
204.2	-170.6	-123.509	-79.1068	-46.246	-23.999	5.75695	43.3429	85.3373	154.379	216.538	340.262
204.25	-169.31	-125.243	-76.8137	-49.0102	-23.2934	6.72231	42.1079	83.291	156.135	216.622	340.689
204.3	-166.509	-126.068	-80.1973	-51.0005	-20.2224	7.95568	39.5715	83.693	157.277	213.941	341.128
204.35	-163.282	-125.208	-85.4983	-51.3017	-17.0037	9.58956	38.072	85.4093	156.825	210.272	340.98
204.4	-161.707	-123.724	-89.264	-51.7596	-15.7733	11.0959	38.5826	86.281	154.696	211.214	338.413
204.45	-161.91	-122.472	-92.7343	-53.5139	-15.8083	11.1957	39.7188	87.3706	152.264	216.71	335.008
204.5	-163.371	-120.782	-94.3737	-55.3223	-16.5077	10.3242	40.6142	90.1462	150.423	220.476	334.273
204.55	-165.45	-119.392	-91.8411	-55.9086	-19.3334	9.73293	40.7315	91.6131	149.002	219.96	336.643
204.6	-166.486	-120.131	-87.1681	-55.4705	-23.8951	8.58572	39.9282	88.7632	147.659	217.445	339.235
204.65	-166.868	-121.892	-83.8597	-55.3128	-25.698	6.66393	39.2129	84.1155	146.665	214.013	340.02
204.7	-168.624	-120.827	-83.3001	-55.3581	-22.0852	6.58614	39.3018	81.0461	147.141	209.162	340.324
204.75	-171.638	-115.592	-84.2651	-55.5355	-17.0084	9.66642	41.0294	80.7766	150.107	204.519	342.016
204.8	-172.81	-110.599	-85.2064	-57.7225	-16.3092	13.9072	43.5558	82.6503	154.151	202.639	344.644
204.85	-169.501	-110.81	-85.3001	-60.811	-20.5669	18.1725	43.1219	84.2723	156.493	204.55	345.448
204.9	-164.965	-115.387	-82.9044	-60.4442	-24.4085	21.2922	40.2563	84.7727	157.068	208.784	344.022
204.95	-163.811	-120.853	-78.2276	-57.0587	-23.3354	20.1996	39.9829	85.0601	158.196	212.077	342.947
205	-165.281	-124.219	-74.7802	-55.1414	-19.4979	13.9077	42.0638	84.8953	159.218	214.455	343.604
205.05	-167.066	-123.389	-73.6464	-54.7192	-17.9802	5.40917	42.5267	83.9437	157.339	218.458	347.352
205.1	-166.884	-120.069	-72.6012	-51.2647	-18.7333	-1.13169	41.6637	82.6367	153.44	222.334	353.566
205.15	-162.854	-117.993	-71.4246	-45.256	-18.2566	-3.56669	42.9742	81.7417	150.516	222.351	356.58
205.2	-157.093	-117.789	-71.9077	-44.0302	-15.7439	-2.37903	46.5703	82.0506	149.176	219.124	352.719
205.25	-153.917	-118.498	-73.6461	-49.459	-13.5208	1.64098	48.6475	82.6455	149.023	215.684	346.132
205.3	-156.345	-121.5	-74.5058	-54.2087	-14.3726	6.79789	47.2757	82.511	149.811	213.666	343.49
205.35	-162.581	-126.438	-75.3466	-54.1093	-18.4122	9.86986	44.3337	84.1835	151.479	213.672	345.379
205.4	-165.158	-128.314	-79.6177	-52.4381	-21.8418	9.29151	42.5321	89.0984	154.615	215.085	346.987
205.45	-160.747	-124.078	-86.4368	-52.2923	-21.2902	6.67141	42.4067	93.065	159.003	215.621	345.694
205.5	-155.528	-116.8	-91.3862	-52.993	-18.3046	4.94106	42.5295	92.4611	162.262	213.986	343.007
205.55	-154.52	-112.284	-92.7479	-51.9399	-16.4638	5.17078	42.2969	88.875	161.161	210.86	341.35
205.6	-157.037	-113.108	-92.0557	-49.5188	-17.0548	5.35783	42.3159	85.8429	156.603	208.223	341.781
205.65	-160.868	-117.246	-90.5246	-50.5475	-19.1262	4.1391	43.006	85.4381	153.973	207.572	342.463
205.7	-163.458	-121.192	-88.5378	-55.686	-20.3872	3.23073	43.2942	87.2635	155.784	207.8	341.902
205.75	-165.01	-122.236	-87.8921	-59.7757	-18.2443	4.63154	42.2994	89.1134	159.452	207.24	342.21
205.8	-166.145	-121.777	-90.3949	-60.3084	-14.4463	6.7488	42.5009	89.1892	161.957	208.318	344.624
205.85	-163.719	-123.296	-94.8789	-57.9496	-14.2078	6.84477	44.5033	87.299	160.912	213.539	346.944
205.9	-156.669	-124.269	-98.9377	-54.2751	-16.5231	5.53798	44.3936	84.9011	156.31	219.098	347.282
205.95	-149.858	-120.63	-101.373	-50.9577	-15.8791	3.6431	41.8977	83.4207	151.635	220.978	346.289
206	-149.101	-116.336	-100.362	-49.0577	-14.5195	0.898443	39.9276	83.5163	149.318	220.183	345.718
206.05	-152.654	-116.982	-95.0244	-49.8867	-17.24	0.529278	38.4772	85.6368	148.884	219.337	346.045
206.1	-151.978	-120.554	-89.8607	-52.5581	-20.9728	4.57387	37.8241	88.6169	148.443	220.534	346.061
206.15	-148.217	-121.018	-88.4692	-55.1582	-22.3085	7.96507	39.8561	90.1958	147.192	222.44	345.449
206.2	-148.939	-117.54	-88.4145	-56.6943	-23.501	6.46396	44.0038	89.2258	146.408	220.385	345.574
206.25	-152.901	-117.028	-88.0699	-55.4534	-25.7716	2.70151	48.5013	86.5863	146.681	213.69	346.569
206.3	-156.906	-121.081	-87.4454	-53.555	-26.5251	1.82207	50.9431	84.6351	146.972	208.348	346.815
206.35	-163.022	-122.439	-83.4946	-55.2763	-24.3979	5.56609	49.7421	84.7027	147.897	207.701	346.608
206.4	-169.158	-122.288	-77.2666	-57.8526	-21.075	9.80706	47.052	86.6965	151.385	208.43	347.633
206.45	-168.166	-126.234	-76.4211	-57.9188	-19.1499	11.1011	47.3693	89.3742	156.948	208.363	349.218
206.5	-162.173	-130.704	-82.9049	-59.0898	-21.6988	10.9373	50.9156	89.5153	161.213	210.104	349.388
206.55	-158.947	-130.678	-88.5172	-63.0441	-27.5969	10.9358	51.8322	87.3431	160.694	214.891	348.091
206.6	-159.027	-128.188	-88.6487	-65.5813	-30.5946	11.3957	47	86.0409	156.717	218.445	347.736
206.65	-159.154	-128.029	-87.7975	-63.1257	-29.989	11.8496	42.0831	83.8245	153.644	218.436	350.326
206.7	-159.143	-130.684	-88.981	-57.2191	-29.909	11.5162	42.4308	78.9059	152.554	218.328	353.916
206.75	-159.956	-133.832	-90.3552	-54.0612	-29.4807	12.3823	45.6469	73.7307	153.823	218.733	354.015
206.8	-160.968	-135.882	-88.5124	-56.0457	-25.7454	17.0769	47.9037	71.3608	158.248	216.508	350.385
206.85	-160.569	-136.441	-82.3737	-58.7335	-20.8136	22.5507	48.0974	74.8815	163.872	213.427	348.139
206.9	-157.369	-135.896	-77.5244	-59.5375	-17.8463	23.7639	46.3936	82.1578	169.12	213.955	349.976
206.95	-152.886	-133.565	-79.5898	-59.6552	-16.8299	21.7263	43.5284	86.2709	173.366	216.846	352.897
207	-151.429	-128.217	-84.8869	-59.483	-19.7025	19.4684	39.0964	86.9591	175.171	218.283	353.884
207.05	-154.035	-122.457	-86.6713	-58.1856	-28.4928	16.5092	34.5274	88.3534	173.829	217.068	353.72
207.1	-157.203	-120.431	-85.4681	-54.5799	-35.1946	13.2954	34.2391	89.6327	169.009	216.028	353.483
207.15	-158.339	-121.354	-84.4436	-49.7136	-30.3081	12.078	38.0417	89.5357	162.178	218.443	352.695
207.2	-156.996	-122.322	-83.7815	-46.2147	-20.3489	13.1971	40.5535	90.2826	157.169	221.6	352.313
207.25	-154.893	-123.306	-82.9211	-43.7202	-16.4932	14.5675	41.744	91.5186	155.385	220.159	353.103
207.3	-155.563	-125.345	-84.2381	-40.4957	-17.8873	12.7389	44.3896	90.2786	155.442	215.067	352.121
207.35	-159.453	-128.396	-89.0326	-39.9206	-18.197	8.67353	45.9718	88.3708	156.411	210.21	348.217
207.4	-162.721	-130.926	-93.1132	-44.1424	-16.2404	7.10863	44.8777	89.8531	158.642	207.39	343.787
207.45	-162.41	-132.107	-93.4264	-48.3683	-15.6589	6.51157	45.5969	91.8168	161.966	206.824	340.876
207.5	-160.021	-132.253	-91.9291	-48.6083	-18.8964	3.58381	51.9922	89.6136	164.246	208.287	341.394
207.55	-159.366	-130.895	-90.2914	-46.5206	-23.2669	0.865146	59.6216	85.4922	163.965	212.281	343.814
207.6	-161.504	-127.278	-87.9853	-44.8133	-24.1245	1.47195	57.6299	83.4871	162.828	218.538	343.128
207.65	-164.352	-122.035	-84.4596	-44.8688	-21.6556	6.00843	45.2339	83.4794	162.767	222.961	340.799
207.7	-167.1	-117.563	-81.3867	-47.1018	-17.7075	11.4405	36.9348	83.0444	162.917	222.882	342.283
207.75	-170.713	-117.425	-81.6271	-50.3267	-12.5928	11.4834	39.3868	81.6975	162.323	220.705	346.244
207.8	-173.735	-122.716	-85.8272	-52.4697	-9.08028	5.92797	46.3383	82.0548	160.48	218.887	347.559
207.85	-173.826	-130.332	-91.1917	-53.053	-11.185	2.27828	52.7225	83.2144	157.653	218.051	344.038
207.9	-172.183	-135.234	-93.9966	-54.2473	-17.2904	2.52043	56.2597	80.7666	155.808	219.185	338.17
207.95	-171.457	-134.443	-92.8073	-56.6332	-21.5882	1.9659	56.7326	76.1494	155.865	221.076	336.575
208	-171.125	-129.219	-87.8935	-56.9175	-22.4918	-0.282921	54.806	75.9698	157.657	219.706	343.204
208.05	-170.251	-123.657	-81.0475	-54.8292	-23.2059	-0.679397	48.9516	80.4338	161.667	214.967	352.582
208.1	-169.969	-122.189	-77.088	-54.2944	-26.0645	1.41839	39.9852	84.2597	164.975	209.823	356.904
208.15	-169.902	-125.59	-77.6735	-55.3234	-29.817	3.1567	34.6115	84.6148	161.876	204.553	355.242
208.2	-167.67	-128.485	-78.255	-55.3231	-31.8029	3.68274	35.5779	82.6441	153.528	200.154	351.599
208.25	-164.039	-126.765	-76.2833	-54.268	-30.5099	4.99454	38.8048	81.4057	147.248	198.874	349.304
208.3	-162.233	-123.766	-74.2782	-52.2801	-26.9292	8.40598	41.252	83.3525	145.295	199.615	348.27
208.35	-162.572	-123.61	-75.0567	-48.6414	-23.8509	12.5298	44.1202	87.2108	145.934	201.778	346.18
208.4	-162.784	-125.126	-79.4381	-44.429	-22.0419	14.3462	47.7016	89.2283	146.545	206.429	342.736
208.45	-161.984	-124.254	-84.8329	-41.9666	-20.305	12.8049	49.9242	87.9506	146.15	210.794	339.178
208.5	-161.796	-119.249	-86.4724	-43.4961	-20.2002	9.8068	49.9627	85.1468	148.767	211.615	337.526
208.55	-163.391	-113.073	-83.5335	-48.6463	-23.0667	7.45838	48.3904	82.138	154.199	210.991	341.831
208.6	-166.134	-109.425	-80.4846	-53.1642	-25.1965	6.3587	45.3774	78.9852	155.187	209.647	352.314
208.65	-167.981	-110.655	-80.3502	-54.2808	-22.8463	5.2272	42.3092	76.3283	150.223	206.111	359.91
208.7	-168.07	-116.72	-80.869	-53.1802	-18.2327	3.61979	42.3304	74.3568	144.824	202.857	356.572
208.75	-167.271	-121.716	-79.8541	-51.6303	-16.4643	4.3306	45.3773	73.491	140.829	202.515	348.249
208.8	-165.74	-121.116	-77.5965	-51.333	-19.3758	8.72745	48.1121	74.675	138.842	204.031	345.18
208.85	-163.98	-119.58	-74.1846	-53.6191	-24.3937	13.3925	49.245	77.5036	141.632	205.508	346.679
208.9	-163.162	-122.118	-72.3784	-57.4889	-28.3707	14.4528	49.8701	81.5033	148.967	206.509	347.65
208.95	-160.132	-127.078	-75.7664	-60.9263	-29.7857	11.8075	50.3107	85.2711	156.219	207.458	347.991
[truncated: 6,021 more rows]

## Sheet: Figure 5c
Figure 5c Source Data																											Figure 5c Source Data
Mean Voltage			Mean Current Density (pA/pF)		SEM																						Mean Voltage		Mean Current Density (pA/pF)		SEM
-100.107			-21.9781		5.76985																						-100.077		-164.401		50.585
-80.1039			-16.7531		4.55099																						-80.073		-130.447		39.879
-60.1361			-12.552		3.46942																						-60.1095		-97.6649		29.4575
-40.1447			-8.19676		2.27585																						-40.1103		-64.7043		19.504
-20.1393			-4.18584		1.10129																						-20.1263		-33.2993		9.44242
-0.143198			1.16367		0.138343																						-0.127157		-0.708257		0.589313
19.9209			4.83415		1.0723																						19.8669		30.0207		9.57788
39.917			9.11832		2.13972																						39.8661		59.848		18.5963
59.8849			14.2075		3.24146																						59.8246		89.3084		27.3493
79.8809			19.8792		4.55016																						79.8391		119.316		36.5367
99.8887			26.6622		5.85317																						99.8383		146.388		44.3627
150mM Chloride (Pipette)/150mM Chloride (Bath)									150mM Chloride (Pipette)/150mM Chloride (Bath)									150mM Chloride (Pipette)/150mM Chloride (Bath)									150mM Chloride (Pipette)/150mM Chloride (Bath)									150mM Chloride (Pipette)/150mM Chloride (Bath)									150mM Chloride (Pipette)/150mM Chloride (Bath)
hSLC26A6 R404V				Cm	26.12	pF			hSLC26A6 R404V				Cm	26.19	pF			hSLC26A6 R404V				Cm	14.77	pF			mSLC26A9				Cm	9.55	pF			mSLC26A9				Cm	10.59	pF			mSLC26A9				Cm
Current	Voltage	CD (pA/pF)							Current	Voltage	CD (pA/pF)							Current	Voltage	CD (pA/pF)							Current	Voltage	CD (pA/pF)							Current	Voltage	CD (pA/pF)							Current	Voltage	CD (pA/pF)
-408.936	-100.067	-15.656							-1582.64	-100.067	-60.4292							-36.6211	-100.098	-2.47942							-1026.61	-100.067	-107.499							-633.545	-100.067	-59.8248							-1347.66	-100.067	-128.226
-284.424	-80.0781	-10.8891							-1195.68	-80.0781	-45.654							-4.27246	-80.0476	-0.289266							-822.144	-80.0781	-86.0883							-505.981	-80.0476	-47.7792							-1097.41	-80.0476	-104.416
-167.847	-60.0891	-6.42598							-889.893	-60.1196	-33.9783							-37.2314	-60.1196	-2.52075							-622.559	-60.1196	-65.1894							-388.794	-60.0891	-36.7133							-809.326	-60.0891	-77.0053
-103.149	-40.1001	-3.94906							-571.899	-40.1306	-21.8366							-28.0762	-40.1306	-1.90089							-418.701	-40.1306	-43.8431							-258.179	-40.1001	-24.3795							-534.058	-40.1001	-50.8142
-54.9316	-20.1111	-2.10305							-275.879	-20.1111	-10.5337							-15.2588	-20.1111	-1.03309							-215.454	-20.1416	-22.5606							-151.367	-20.1416	-14.2934							-281.372	-20.1416	-26.7718
9.15527	-0.0915527	0.350508							-4.88281	-0.12207	-0.186438							16.4795	-0.0915527	1.11574							-9.15527	-0.12207	-0.958667							-21.9727	-0.12207	-2.07485							-24.4141	-0.12207	-2.32294
63.4766	19.8975	2.43019							258.789	19.928	9.88122							12.207	19.8364	0.826475							178.833	19.8364	18.726							90.332	19.8669	8.52994							234.985	19.8669	22.3583
145.264	39.8865	5.5614							529.785	39.856	20.2285							34.1797	39.856	2.31413							379.639	39.856	39.7527							192.261	39.856	18.1549							465.088	39.856	44.2519
226.44	59.845	8.66924							803.223	59.845	30.6691							75.6836	59.8145	5.12414							563.965	59.8145	59.0539							313.721	59.8145	29.6242							693.359	59.8145	65.9714
316.772	79.8645	12.1276							1140.75	79.834	43.5566							101.318	79.834	6.85974							750.732	79.834	78.6107							417.48	79.834	39.4221							916.138	79.834	87.1682
476.074	99.8535	18.2264							1497.19	99.823	57.1666							107.422	99.8535	7.27298							929.565	99.8535	97.3367							534.668	99.8535	50.488							1138.92	99.8535	108.365
150mM Chloride (Pipette)/150mM Chloride (Bath)									150mM Chloride (Pipette)/150mM Chloride (Bath)									150mM Chloride (Pipette)/150mM Chloride (Bath)									150mM Chloride (Pipette)/150mM Chloride (Bath)									150mM Chloride (Pipette)/150mM Chloride (Bath)									150mM Chloride (Pipette)/150mM Chloride (Bath)
hSLC26A6 R404V				Cm	14.77	pF			hSLC26A6 R404V				Cm	16.12	pF			hSLC26A6 R404V				Cm	22.33	pF			mSLC26A9				Cm	14.02	pF			mSLC26A9				Cm	20.46	pF			mSLC26A9				Cm
Current	Voltage	CD (pA/pF)							Current	Voltage	CD (pA/pF)							Current	Voltage	CD (pA/pF)							Current	Voltage	CD (pA/pF)							Current	Voltage	CD (pA/pF)							Current	Voltage	CD (pA/pF)
-198.364	-100.067	-13.4302							-72.6318	-100.098	-4.5057							-412.598	-100.128	-18.4773							-853.882	-100.098	-60.9046							-5398.56	-100.067	-263.859							-7490.23	-100.098	-366.092
-119.019	-80.0781	-8.05813							-17.7002	-80.0781	-1.09803							-298.462	-80.1392	-13.366							-650.024	-80.0476	-46.3641							-4296.88	-80.1086	-210.013							-5892.94	-80.1086	-288.023
-86.0596	-60.1196	-5.82665							-18.9209	-60.1196	-1.17375							-219.727	-60.1501	-9.83997							-502.319	-60.1196	-35.8288							-3230.59	-60.1196	-157.898							-4365.23	-60.1196	-213.355
-64.0869	-40.1001	-4.33899							1.83105	-40.1306	0.113589							-131.226	-40.1611	-5.87665							-327.759	-40.1001	-23.3779							-2138.67	-40.1001	-104.529							-2890.62	-40.1306	-141.282
-30.5176	-20.1111	-2.06619							5.49316	-20.0806	0.340767							-78.125	-20.1721	-3.49866							-185.547	-20.1111	-13.2344							-1071.17	-20.1111	-52.3542							-1444.09	-20.1111	-70.5812
15.2588	-0.0915527	1.03309							22.583	-0.0915527	1.40093							32.959	-0.152588	1.476							13.4277	-0.152588	0.957756							21.3623	-0.12207	1.0441							-18.3105	-0.12207	-0.894944
52.4902	19.8975	3.55384							26.8555	19.8669	1.66597							89.1113	19.928	3.99066							173.95	19.8669	12.4073							1057.74	19.8975	51.6979							1358.64	19.8669	66.4048
111.084	39.8865	7.52092							40.2832	39.856	2.49896							145.264	39.9475	6.50531							350.342	39.8865	24.9887							2057.5	39.8865	100.562							2687.99	39.856	131.378
165.405	59.845	11.1987							98.2666	59.8145	6.09594							208.13	59.906	9.32064							525.513	59.8145	37.4831							3035.89	59.8755	148.382							3996.58	59.8145	195.336
191.04	79.8645	12.9343							148.926	79.834	9.23857							300.903	79.895	13.4753							701.904	79.834	50.0645							4144.9	79.8645	202.585							5279.54	79.834	258.042
361.938	99.8535	24.505							165.405	99.8535	10.2609							399.17	99.9146	17.8759							862.427	99.823	61.514							4953.61	99.823	242.112							6516.72	99.823	318.51
150mM Chloride (Pipette)/150mM Chloride (Bath)									150mM Chloride (Pipette)/150mM Chloride (Bath)									150mM Chloride (Pipette)/150mM Chloride (Bath)
hSLC26A6 R404V				Cm	16.09	pF			hSLC26A6 R404V				Cm	23.85	pF			hSLC26A6 R404V				Cm	16.09	pF
Current	Voltage	CD (pA/pF)							Current	Voltage	CD (pA/pF)							Current	Voltage	CD (pA/pF)
-112.915	-100.098	-7.01772							-1658.33	-100.128	-69.5315							-98.877	-100.128	-6.14524
-100.098	-80.1086	-6.22111							-1315.92	-80.1392	-55.1748							-84.8389	-80.1086	-5.27277
-75.6836	-60.1501	-4.70377							-1054.08	-60.1501	-44.1961							-57.9834	-60.1501	-3.60369
-50.0488	-40.1611	-3.11055							-703.735	-40.1611	-29.5067							-45.7764	-40.1611	-2.84502
-29.9072	-20.1416	-1.85875							-351.562	-20.1416	-14.7406							-32.3486	-20.1416	-2.01048
25.0244	-0.152588	1.55528							38.4521	-0.152588	1.61225							28.6865	-0.183105	1.78288
37.8418	19.9585	2.35188							379.028	19.9585	15.8922							40.2832	19.9585	2.50362
54.3213	39.9475	3.37609							733.032	39.9475	30.7351							56.7627	39.9475	3.52782
80.5664	59.906	5.00723							1112.67	59.9365	46.6529							93.3838	59.9365	5.80384
109.863	79.9255	6.82805							1511.23	79.895	63.364							131.226	79.895	8.15572
120.239	99.9146	7.47292							1862.18	99.9146	78.0789							194.092	99.9146	12.0629
150mM Chloride (Pipette)/150mM Chloride (Bath)									150mM Chloride (Pipette)/150mM Chloride (Bath)									150mM Chloride (Pipette)/150mM Chloride (Bath)
hSLC26A6 R404V				Cm	30.21	pF			hSLC26A6 R404V				Cm	14.06	pF			hSLC26A6 R404V				Cm	30.02	pF
Current	Voltage	CD (pA/pF)							Current	Voltage	CD (pA/pF)							Current	Voltage	CD (pA/pF)
-1499.63	-100.128	-49.6403							-167.236	-100.128	-11.8945							-524.292	-100.128	-17.4648
-1155.4	-80.1392	-38.2455							-139.771	-80.1392	-9.941							-418.701	-80.1086	-13.9474
-808.105	-60.1501	-26.7496							-114.136	-60.1501	-8.11776							-278.931	-60.1501	-9.29149
-511.475	-40.1611	-16.9306							-75.6836	-40.1611	-5.3829							-178.833	-40.1611	-5.95713
-239.258	-20.1721	-7.91982							-39.6729	-20.1721	-2.82168							-95.2148	-20.1721	-3.17171
41.5039	-0.183105	1.37385							17.0898	-0.183105	1.21549							34.1797	-0.183105	1.13856
248.413	19.928	8.22288							47.6074	19.9585	3.38602							126.953	19.928	4.22895
482.178	39.9475	15.9609							89.7217	39.9475	6.38134							233.765	39.9475	7.78696
808.716	59.9365	26.7698							127.563	59.906	9.07279							351.562	59.906	11.7109
1237.18	79.895	40.9528							170.288	79.895	12.1115							477.905	79.895	15.9196
1773.07	99.9146	58.6915							227.661	99.9146	16.1921							604.858	99.9146	20.1485
150mM Chloride (Pipette)/150mM Chloride (Bath)									150mM Chloride (Pipette)/150mM Chloride (Bath)
hSLC26A6 R404V				Cm	14.06	pF			hSLC26A6 R404V				Cm	30.02	pF
Current	Voltage	CD (pA/pF)							Current	Voltage	CD (pA/pF)
-139.16	-100.128	-9.89759							-634.155	-100.128	-21.1244
-125.732	-80.1392	-8.94256							-523.682	-80.1086	-17.4444
-91.5527	-60.1501	-6.51157							-383.911	-60.1501	-12.7885
-67.1387	-40.1611	-4.77515							-253.906	-40.1611	-8.4579
-37.8418	-20.1721	-2.69145							-134.888	-20.1721	-4.49326
18.9209	-0.183105	1.34573							32.3486	-0.183105	1.07757
50.0488	19.9585	3.55966							155.64	19.928	5.18453
83.6182	39.9475	5.94724							279.541	39.9475	9.31183
121.46	59.906	8.63869							425.415	59.906	14.1711
173.95	79.895	12.372							612.793	79.9255	20.4128
234.375	99.9146	16.6696							859.985	99.9146	28.6471
[truncated: 14 more columns]

## Sheet: Figure 5d
Figure 5D
	Current Density at 100mV
	R404V	SLC26A6 WT
	18.2264	10.3054
	57.1666	3.97524
	7.27298	8.65833
	24.505	33.9612
	10.2609	26.5153
	17.8759	25.4723
	7.47292
	78.0789
	12.0629
	58.6915
	16.1921
	20.1485
	16.6696
	28.6471

## Sheet: Figure 5e
Figure 1c & Figure 5d
		mSLC26A9	hSLC26A6 R404V	hSLC26A6		Surface to Input Ratio	mSLC26A9	hSLC26A6 R404V	hSLC26A6
	Clarified Lysate	23762	32317	12389			0.647757	0.763743	1.134
	Flow-through	13504	20541	5191
	Eluted Surface	7270	21249	11213

## Sheet: Figure 5f
Figure 5f		hSLC26A6 (Cl-)		Raw Data					hSLC26A6 (Cl-)		Normalised Data								Figure 5f		R404V (Cl-)		Raw Data					hSLC26A6 (Cl-)		Normalised Data
Time [s]		n1	n2	n3	n4	n5			n1	n2	n3	n4	n5		Mean	SEM			Time [s]		n1	n2	n3	n4	n5			n1	n2	n3	n4	n5		Mean	SEM
0		19035	19654	20462	21854	24427			111.225	113.103	110.046	112.713	99.5395		109.325	2.50642			0		32839	34399	42975	37181	48835			111.104	112.232	121.241	103.47	113.89		112.387	2.84453
5.015		19043	19480	20270	21760	24601			111.272	112.102	109.014	112.229	100.249		108.973	2.256			5.015		32626	34458	42785	36943	48521			110.383	112.424	120.705	102.808	113.158		111.896	2.86659
10.02		18942	19555	20175	21736	24426			110.681	112.534	108.503	112.105	99.5354		108.672	2.38998			10.02		32393	34401	42551	36818	48302			109.595	112.238	120.045	102.46	112.647		111.397	2.8299
15.026		18876	19356	20182	21588	24407			110.296	111.389	108.54	111.341	99.458		108.205	2.24684			15.026		32417	34463	42305	36645	48690			109.676	112.441	119.351	101.979	113.552		111.4	2.83426
20.034		18879	19256	19989	21611	24489			110.313	110.813	107.502	111.46	99.7922		107.976	2.15464			20.034		32397	34347	42264	36677	48823			109.609	112.062	119.235	102.068	113.862		111.367	2.81232
25.039		18897	19131	19950	21490	24426			110.418	110.094	107.293	110.836	99.5354		107.635	2.11848			25.039		32237	34450	42407	36517	48880			109.067	112.398	119.638	101.622	113.995		111.344	2.97177
30.046		18761	19073	19910	21425	24363			109.624	109.76	107.078	110.501	99.2787		107.248	2.07453			30.046		32180	34372	42178	36431	48906			108.874	112.144	118.992	101.383	114.056		111.09	2.92818
35.061		18551	18981	19778	21244	24354			108.397	109.231	106.368	109.567	99.2421		106.561	1.91231			35.061		31989	34429	42077	36335	48888			108.228	112.329	118.707	101.116	114.014		110.879	2.96276
40.076		18553	18955	19843	21097	24409			108.408	109.081	106.717	108.809	99.4662		106.496	1.80495			40.076		32095	34373	42209	36332	49046			108.587	112.147	119.08	101.108	114.382		111.061	3.01414
45.082		18413	18777	19885	21182	24311			107.59	108.057	106.943	109.248	99.0668		106.181	1.81796			45.082		31908	34199	42033	36302	48834			107.954	111.579	118.583	101.024	113.888		110.606	2.95126
50.089		18381	18906	19695	21003	24332			107.403	108.799	105.921	108.324	99.1524		105.92	1.76167			50.089		31948	34347	41879	36237	48895			108.09	112.062	118.149	100.843	114.03		110.635	2.9358
55.095		18330	18786	19720	20987	24351			107.105	108.108	106.056	108.242	99.2298		105.748	1.67651			55.095		31691	34298	41585	36037	48830			107.22	111.902	117.319	100.287	113.879		110.121	2.9516
60.102		18226	18693	19673	20849	24547			106.498	107.573	105.803	107.53	100.028		105.486	1.40432			60.102		31598	34111	41647	35948	48862			106.905	111.292	117.494	100.039	113.953		109.937	3.0186
110.846		17114	17377	18594	19389	24540			100	100	100	100	100		100	0			110.846		29557	30650	35446	35934	42879			100	100	100	100	100		100	0
115.853		17204	17445	18670	19335	24693			100.526	100.391	100.409	99.7215	100.624		100.334	0.15885			115.853		29620	30602	35426	35976	43277			100.213	99.8434	99.9436	100.117	100.928		100.209	0.191032
120.859		17210	17448	18624	19325	24788			100.561	100.409	100.161	99.6699	101.011		100.362	0.221548			120.859		29485	30695	35347	35933	43381			99.7564	100.147	99.7207	99.9972	101.171		100.158	0.264958
125.867		17073	17478	18678	19339	24714			99.7604	100.581	100.452	99.7421	100.709		100.249	0.207209			125.867		29486	30736	35253	35711	43452			99.7598	100.281	99.4555	99.3794	101.336		100.042	0.360192
130.874		17083	17416	18677	19317	24655			99.8189	100.224	100.446	99.6287	100.469		100.117	0.168971			130.874		29469	30572	35207	35762	43387			99.7023	99.7455	99.3257	99.5213	101.185		99.8959	0.330644
135.879		16950	17439	18651	19257	24569			99.0417	100.357	100.307	99.3192	100.118		99.8285	0.27111			135.879		29349	30534	35180	35457	43421			99.2963	99.6215	99.2496	98.6726	101.264		99.6208	0.438314
140.886		16786	17373	18574	19132	24457			98.0834	99.977	99.8924	98.6745	99.6618		99.2578	0.374335			140.886		29316	30588	34979	35367	43379			99.1846	99.7977	98.6825	98.4221	101.166		99.4506	0.488976
145.894		16737	17334	18726	19157	24305			97.7971	99.7525	100.71	98.8034	99.0424		99.2211	0.486468			145.894		29248	30379	35187	35376	43447			98.9546	99.1158	99.2693	98.4471	101.325		99.4223	0.495286
150.886		16765	17316	18516	19006	24488			97.9607	99.649	99.5805	98.0246	99.7881		99.0006	0.412955			150.886		29029	30644	35034	35218	43300			98.2136	99.9804	98.8377	98.0075	100.982		99.2042	0.561701
155.893		16700	17315	18550	19056	24337			97.5809	99.6432	99.7634	98.2825	99.1728		98.8886	0.417895			155.893		29213	30679	34962	35061	43499			98.8362	100.095	98.6345	97.5705	101.446		99.3163	0.666481
160.896		16590	17280	18606	18979	24292			96.9382	99.4418	100.064	97.8854	98.9894		98.6639	0.559326			160.896		28890	30665	34978	34888	43392			97.7433	100.049	98.6797	97.0891	101.196		98.9515	0.749863
165.903		16550	17275	18574	18976	24205			96.7044	99.413	99.8924	97.8699	98.6349		98.5029	0.566199			165.903		29070	30623	34968	34844	43300			98.3523	99.9119	98.6515	96.9667	100.982		98.9728	0.686689
170.906		16638	17400	18601	18884	24116			97.2186	100.132	100.038	97.3954	98.2722		98.6113	0.627729			170.906		28823	30746	34953	34753	43241			97.5167	100.313	98.6091	96.7134	100.844		98.7993	0.79075
175.911		16557	17398	18677	18832	24315			96.7454	100.121	100.446	97.1272	99.0831		98.7046	0.758601			175.911		28840	30521	34879	34521	43289			97.5742	99.5791	98.4004	96.0678	100.956		98.5155	0.83603
180.915		16601	17333	18669	18888	24190			97.0024	99.7468	100.403	97.4161	98.5738		98.6285	0.652606			180.915		28750	30537	34905	34773	43351			97.2697	99.6313	98.4737	96.7691	101.101		98.6489	0.788784
185.923		16555	17184	18601	18894	24146			96.7337	98.8893	100.038	97.447	98.3945		98.3004	0.572559			185.923		28724	30469	34702	34563	43189			97.1817	99.4095	97.901	96.1847	100.723		98.28	0.805735
190.929		16587	17201	18626	18863	24165			96.9206	98.9872	100.172	97.2871	98.4719		98.3678	0.58788			190.929		28532	30540	34621	34413	43161			96.5321	99.6411	97.6725	95.7672	100.658		98.0541	0.921659
195.935		16568	17245	18647	18803	24077			96.8096	99.2404	100.285	96.9777	98.1133		98.2852	0.664382			195.935		28608	30568	34840	34351	43205			96.7892	99.7325	98.2904	95.5947	100.76		98.2334	0.940318
200.943		16491	17235	18595	18800	24163			96.3597	99.1828	100.005	96.9622	98.4637		98.1948	0.678736			200.943		28594	30558	34807	34257	42846			96.7419	99.6998	98.1973	95.3331	99.923		97.979	0.875197
205.949		16461	17279	18610	18817	24030			96.1844	99.436	100.086	97.0499	97.9218		98.1356	0.725496			205.949		28649	30389	34552	34192	43123			96.928	99.1484	97.4779	95.1522	100.569		97.8551	0.931275
210.953		16428	17171	18570	18697	24038			95.9916	98.8145	99.8709	96.431	97.9544		97.8125	0.724073			210.953		28542	30511	34660	34338	43036			96.566	99.5465	97.7825	95.5585	100.366		97.9639	0.895772
215.96		16422	17305	18625	18833	24146			95.9565	99.5857	100.167	97.1324	98.3945		98.2471	0.774197			215.96		28383	30418	34607	34127	43040			96.028	99.2431	97.633	94.9713	100.376		97.6502	0.994298
220.967		16383	17198	18624	18767	23955			95.7286	98.9699	100.161	96.792	97.6161		97.8536	0.783277			220.967		28476	30495	34534	34143	42972			96.3427	99.4943	97.4271	95.0159	100.217		97.6994	0.966326
225.973		16458	17155	18612	18738	24026			96.1669	98.7224	100.097	96.6424	97.9055		97.9068	0.710188			225.973		28506	30407	34473	34038	42975			96.4442	99.2072	97.255	94.7237	100.224		97.5708	0.97959
230.98		16345	17166	18596	18643	24096			95.5066	98.7857	100.011	96.1525	98.1907		97.7293	0.835495			230.98		28276	30504	34447	33993	42930			95.666	99.5237	97.1816	94.5984	100.119		97.4177	1.0678
235.986		16346	17223	18565	18801	23968			95.5125	99.1138	99.844	96.9673	97.6691		97.8213	0.769582			235.986		28161	30284	34291	34024	42855			95.2769	98.8059	96.7415	94.6847	99.944		97.0906	1.00707
240.994		16310	17271	18569	18834	23962			95.3021	99.39	99.8655	97.1376	97.6447		97.868	0.820793			240.994		28245	30379	34180	33951	43087			95.5611	99.1158	96.4284	94.4815	100.485		97.2144	1.12099
246		16316	17062	18708	18634	23929			95.3371	98.1873	100.613	96.106	97.5102		97.5507	0.915751			246		28264	30362	34357	33925	42984			95.6254	99.0604	96.9277	94.4092	100.245		97.2535	1.07378
251.007		16395	17211	18602	18610	23986			95.7988	99.0447	100.043	95.9823	97.7425		97.7222	0.832543			251.007		28156	30241	34220	33939	42967			95.26	98.6656	96.5412	94.4481	100.205		97.024	1.06758
256.014		16394	17124	18743	18690	23815			95.7929	98.544	100.801	96.3949	97.0456		97.7158	0.897156			256.014		28310	30333	34172	33813	42796			95.781	98.9657	96.4058	94.0975	99.8064		97.0113	1.04888
261.021		16376	17136	18754	18624	24032			95.6877	98.6131	100.861	96.0545	97.9299		97.8291	0.936723			261.021		28185	30135	34263	33693	42748			95.3581	98.3197	96.6625	93.7636	99.6945		96.7597	1.04875
266.028		16327	17132	18640	18656	23977			95.4014	98.5901	100.247	96.2195	97.7058		97.6328	0.85832			266.028		28029	30357	34198	33667	42687			94.8303	99.044	96.4792	93.6912	99.5522		96.7194	1.1451
271.035		16476	17151	18735	18648	23985			96.2721	98.6994	100.758	96.1783	97.7384		97.9293	0.849865			271.035		28041	30127	34093	33620	42658			94.8709	98.2936	96.1829	93.5604	99.4846		96.4785	1.08439
276.041		16325	17147	18685	18701	23943			95.3897	98.6764	100.489	96.4516	97.5672		97.7149	0.88449			276.041		28054	30148	34327	33559	42692			94.9149	98.3621	96.8431	93.3907	99.5639		96.6149	1.11998
281.058		16343	17116	18753	18583	23862			95.4949	98.498	100.855	95.843	97.2372		97.5856	0.97599			281.058		27972	30083	34138	33622	42726			94.6375	98.1501	96.3099	93.566	99.6432		96.4613	1.1115
286.072		16356	17149	18644	18610	23941			95.5709	98.6879	100.269	95.9823	97.5591		97.6138	0.867229			286.072		27993	30216	34066	33545	42679			94.7085	98.584	96.1068	93.3517	99.5336		96.4569	1.15785
291.079		16409	17264	18770	18695	23938			95.8806	99.3497	100.947	96.4206	97.5469		98.0289	0.940508			291.079		28014	29981	33955	33470	42560			94.7796	97.8173	95.7936	93.143	99.2561		96.1579	1.08338
296.086		16423	17232	18766	18629	24083			95.9624	99.1656	100.925	96.0803	98.1377		98.0542	0.942227			296.086		27928	30114	33876	33497	42736			94.4886	98.2512	95.5707	93.2181	99.6665		96.239	1.19233
301.093		16340	17191	18786	18656	23950			95.4774	98.9296	101.033	96.2195	97.5958		97.851	0.991134			301.093		27887	29971	33995	33563	42562			94.3499	97.7847	95.9065	93.4018	99.2607		96.1407	1.07705
306.1		16325	17142	18710	18635	24082			95.3897	98.6476	100.624	96.1112	98.1337		97.7812	0.934448			306.1		27822	30166	33947	33288	42643			94.13	98.4209	95.771	92.6365	99.4496		96.0816	1.27651
311.106		16416	17109	18773	18737	23988			95.9215	98.4577	100.963	96.6373	97.7506		97.946	0.872124			311.106		27674	29878	33973	33354	42350			93.6293	97.4812	95.8444	92.8202	98.7663		95.7083	1.12198
316.112		16474	17150	18715	18649	23996			96.2604	98.6937	100.651	96.1834	97.7832		97.9143	0.831986			316.112		27854	29828	33849	33479	42531			94.2382	97.3181	95.4946	93.168	99.1884		95.8815	1.07732
321.119		16367	17224	18770	18562	24080			95.6351	99.1195	100.947	95.7347	98.1255		97.9123	1.01579			321.119		27666	29908	33732	33288	42508			93.6022	97.5791	95.1645	92.6365	99.1348		95.6234	1.21186
326.126		16353	17276	18718	18689	24152			95.5533	99.4188	100.667	96.3897	98.4189		98.0895	0.944452			326.126		27813	29819	33729	33492	42545			94.0995	97.2887	95.156	93.2042	99.2211		95.7939	1.09463
331.133		16417	17148	18893	18733	24025			95.9273	98.6822	101.608	96.6166	97.9014		98.1471	0.989805			331.133		27694	29623	33801	33408	42334			93.6969	96.6493	95.3591	92.9704	98.729		95.481	1.03477
336.14		16448	17127	18821	18596	24053			96.1085	98.5613	101.221	95.91	98.0155		97.9632	0.96509			336.14		27574	29818	33655	33306	42311			93.2909	97.2855	94.9472	92.6866	98.6753		95.3771	1.14665
341.148		16506	17171	18799	18683	24074			96.4474	98.8145	101.103	96.3588	98.1011		98.1648	0.873719			341.148		27556	29668	33874	33212	42480			93.23	96.7961	95.5651	92.425	99.0695		95.4171	1.20414
346.154		16479	17242	18798	18739	24158			96.2896	99.2231	101.097	96.6476	98.4434		98.3401	0.879222			346.154		27517	29693	33650	33252	42243			93.0981	96.8777	94.9331	92.5363	98.5168		95.1924	1.12693
351.161		16424	17221	18886	18646	24022			95.9682	99.1023	101.57	96.1679	97.8892		98.1396	1.0335			351.161		27475	29726	33641	33270	42306			92.956	96.9853	94.9077	92.5864	98.6637		95.2198	1.16478
356.169		16414	17159	18796	18631	24110			95.9098	98.7455	101.086	96.0906	98.2478		98.016	0.952802			356.169		27544	29663	33726	33089	42414			93.1894	96.7798	95.1475	92.0827	98.9155		95.223	1.22599
361.177		16357	17236	18848	18706	24071			95.5767	99.1886	101.366	96.4774	98.0888		98.1395	1.02088			361.177		27331	29611	33575	33184	42457			92.4688	96.6101	94.7215	92.3471	99.0158		95.0327	1.26958
366.194		16457	17184	18873	18681	24152			96.161	98.8893	101.501	96.3484	98.4189		98.2636	0.974212			366.194		27416	29543	33682	33088	42145			92.7564	96.3882	95.0234	92.0799	98.2882		94.9072	1.14581
371.202		16424	17231	18858	18733	24150			95.9682	99.1598	101.42	96.6166	98.4108		98.315	0.968362			371.202		27162	29522	33437	33117	42274			91.897	96.3197	94.3322	92.1606	98.5891		94.6597	1.26847
376.209		16441	17155	18823	18762	24173			96.0675	98.7224	101.232	96.7662	98.5045		98.2585	0.898395			376.209		27304	29562	33435	33098	42338			92.3774	96.4502	94.3266	92.1077	98.7383		94.8001	1.25648
381.216		16359	17201	18844	18627	24151			95.5884	98.9872	101.344	96.0699	98.4148		98.081	1.045			381.216		27300	29618	33528	32985	42115			92.3639	96.6329	94.5889	91.7933	98.2182		94.7195	1.22538
386.221		16460	17235	18798	18740	24161			96.1786	99.1828	101.097	96.6527	98.4556		98.3134	0.889955			386.221		27344	29443	33299	33114	42106			92.5128	96.062	93.9429	92.1523	98.1972		94.5734	1.13696
391.23		16386	17232	18830	18671	24178			95.7462	99.1656	101.269	96.2969	98.5249		98.2005	1.00252			391.23		27071	29378	33308	32999	42239			91.5891	95.8499	93.9683	91.8323	98.5074		94.3494	1.29694
396.236		16413	17247	18774	18856	24130			95.9039	99.2519	100.968	97.251	98.3293		98.3408	0.86194			396.236		27131	29350	33327	32943	41963			91.7921	95.7586	94.0219	91.6764	97.8638		94.2226	1.18422
401.243		16434	17190	18780	18802	24101			96.0266	98.9239	101	96.9725	98.2111		98.2269	0.854178			401.243		27183	29389	33287	33010	42049			91.9681	95.8858	93.909	91.8629	98.0643		94.338	1.18761
406.25		16328	17164	18844	18682	24301			95.4073	98.7742	101.344	96.3536	99.0261		98.1811	1.05135			406.25		26979	29211	33458	32933	41965			91.2779	95.3051	94.3915	91.6486	97.8684		94.0983	1.21885
411.257		16413	17266	18725	18790	24233			95.9039	99.3612	100.704	96.9106	98.749		98.3259	0.859579			411.257		26988	29215	33258	32977	41991			91.3083	95.3181	93.8272	91.771	97.9291		94.0307	1.21271
416.262		16381	17217	18908	18729	24319			95.717	99.0792	101.689	96.596	99.0994		98.4361	1.05387			416.262		26951	29212	33120	32702	41891			91.1831	95.3083	93.4379	91.0057	97.6958		93.7262	1.2691
421.27		16392	17320	18870	18771	24362			95.7812	99.672	101.484	96.8126	99.2746		98.605	1.02624			421.27		26927	29139	33192	32909	41953			91.1019	95.0701	93.641	91.5818	97.8404		93.8471	1.22785
426.274		16382	17186	18882	18782	24167			95.7228	98.9009	101.549	96.8694	98.48		98.3044	0.990893			426.274		26847	29019	33113	32826	41828			90.8313	94.6786	93.4182	91.3508	97.5489		93.5656	1.21469
431.281		16407	17255	18812	18774	24241			95.8689	99.2979	101.172	96.8281	98.7816		98.3898	0.935815			431.281		26836	29177	33182	32637	41842			90.7941	95.1941	93.6128	90.8248	97.5816		93.6015	1.30325
436.287		16358	17111	18794	18801	24163			95.5826	98.4692	101.076	96.9673	98.4637		98.1117	0.914947			436.287		26816	29099	33141	32694	41866			90.7264	94.9396	93.4972	90.9835	97.6375		93.5568	1.28844
441.293		16366	17227	18778	18711	24322			95.6293	99.1368	100.99	96.5032	99.1116		98.2741	0.973416			441.293		26782	29034	32965	32739	41802			90.6114	94.7276	93.0006	91.1087	97.4883		93.3873	1.25821
446.3		16357	17278	18843	18762	24240			95.5767	99.4303	101.339	96.7662	98.7775		98.378	1.01193			446.3		26704	29032	32942	32818	41782			90.3475	94.721	92.9357	91.3286	97.4416		93.3549	1.26282
451.315		16370	17185	18849	18835	24210			95.6527	98.8951	101.371	97.1427	98.6553		98.3434	0.955302			451.315		26749	28935	32779	32647	41851			90.4997	94.4046	92.4759	90.8527	97.6026		93.1671	1.30679
456.32		16373	17282	18863	18933	24388			95.6702	99.4533	101.447	97.6482	99.3806		98.7198	0.971059			456.32		26555	28928	32881	32523	41712			89.8434	94.3817	92.7636	90.5076	97.2784		92.9549	1.34974
461.327		16430	17243	18795	18841	24278			96.0033	99.2289	101.081	97.1737	98.9324		98.4838	0.876678			461.327		26559	28901	32807	32506	41747			89.8569	94.2936	92.5549	90.4603	97.36		92.9051	1.36319
466.335		16377	17188	18933	18885	24317			95.6936	98.9124	101.823	97.4006	99.0913		98.5842	1.0152			466.335		26497	28874	32814	32502	41745			89.6471	94.2056	92.5746	90.4492	97.3554		92.8464	1.38264
471.341		16351	17233	18779	18876	24311			95.5417	99.1713	100.995	97.3542	99.0668		98.4258	0.922866			471.341		26397	28899	32752	32459	41707			89.3088	94.2871	92.3997	90.3295	97.2667		92.7184	1.42447
476.348		16319	17205	18915	18865	24217			95.3547	99.0102	101.726	97.2974	98.6838		98.4145	1.04896			476.348		26501	28790	32804	32454	41778			89.6607	93.9315	92.5464	90.3156	97.4323		92.7773	1.39334
481.354		16407	17352	18969	18830	24209			95.8689	99.8561	102.017	97.1169	98.6512		98.702	1.06915			481.354		26548	28868	32529	32496	41702			89.8197	94.186	91.7706	90.4325	97.2551		92.6927	1.36489
486.36		16309	17227	18874	18885	24348			95.2963	99.1368	101.506	97.4006	99.2176		98.5114	1.03508			486.36		26350	28718	32645	32458	41689			89.1498	93.6966	92.0978	90.3267	97.2248		92.4991	1.41181
491.37		16385	17233	18927	18860	24413			95.7403	99.1713	101.791	97.2716	99.4825		98.6913	1.02926			491.37		26382	28663	32549	32348	41704			89.258	93.5171	91.827	90.0206	97.2597		92.3765	1.42696
496.374		16292	17263	18849	18813	24350			95.1969	99.344	101.371	97.0292	99.2258		98.4335	1.06149			496.374		26382	28805	32566	32281	41537			89.258	93.9804	91.875	89.8341	96.8703		92.3636	1.4001
501.38		16347	17252	18943	18928	24487			95.5183	99.2807	101.877	97.6224	99.784		98.8164	1.06822			501.38		26255	28668	32569	32308	41568			88.8284	93.5334	91.8834	89.9093	96.9426		92.2194	1.43149
506.387		16435	17129	18839	18878	24352			96.0325	98.5728	101.318	97.3645	99.2339		98.5043	0.890525			506.387		26254	28535	32455	32344	41673			88.825	93.0995	91.5618	90.0095	97.1874		92.1366	1.45362
511.392		16364	17312	18923	18981	24431			95.6176	99.6259	101.769	97.8957	99.5558		98.8929	1.02403			511.392		26011	28600	32423	32297	41759			88.0028	93.3116	91.4715	89.8787	97.388		92.0105	1.60479
516.399		16381	17347	18887	18846	24238			95.717	99.8274	101.576	97.1994	98.7694		98.6178	1.01642			516.399		26171	28519	32423	32182	41592			88.5442	93.0473	91.4715	89.5586	96.9985		91.924	1.48721
521.407		16332	17243	18846	18834	24546			95.4306	99.2289	101.355	97.1376	100.024		98.6354	1.05341			521.407		26037	28552	32305	32197	41695			88.0908	93.155	91.1386	89.6004	97.2387		91.8447	1.58808
526.414		16331	17300	18875	18909	24601			95.4248	99.5569	101.511	97.5244	100.249		98.8532	1.07301			526.414		26157	28521	32238	32115	41618			88.4968	93.0538	90.9496	89.3722	97.0592		91.7863	1.52903
531.42		16348	17340	18911	18918	24385			95.5241	99.7871	101.705	97.5708	99.3684		98.7911	1.04828			531.42		26011	28514	32390	32156	41653			88.0028	93.031	91.3784	89.4863	97.1408		91.8079	1.58096
536.426		16417	17285	18837	18946	24453			95.9273	99.4706	101.307	97.7152	99.6455		98.8131	0.918622			536.426		26095	28457	32221	32043	41460			88.287	92.845	90.9017	89.1718	96.6907		91.5792	1.49704
541.442		16371	17221	18883	18877	24542			95.6585	99.1023	101.554	97.3593	100.008		98.7365	1.02619			541.442		25964	28549	32082	32315	41656			87.8438	93.1452	90.5095	89.9288	97.1478		91.715	1.59985
546.45		16331	17271	18905	18916	24329			95.4248	99.39	101.673	97.5605	99.1402		98.6376	1.03712			546.45		25963	28366	32159	32014	41568			87.8404	92.5481	90.7267	89.0911	96.9426		91.4298	1.58884
551.457		16315	17328	18895	18991	24509			95.3313	99.718	101.619	97.9473	99.8737		98.8978	1.06424			551.457		25873	28298	32128	32024	41606			87.5359	92.3263	90.6393	89.1189	97.0312		91.3303	1.63182
556.464		16454	17243	18861	18980	24540			96.1435	99.2289	101.436	97.8906	100		98.9398	0.904385			556.464		25776	28298	31847	31911	41628			87.2078	92.3263	89.8465	88.8045	97.0825		91.0535	1.72153
561.47		16371	17304	18861	18985	24330			95.6585	99.5799	101.436	97.9163	99.1442		98.747	0.956827			561.47		25787	28462	31929	32002	41522			87.245	92.8613	90.0779	89.0577	96.8353		91.2154	1.67341
566.478		16397	17389	18931	18919	24451			95.8105	100.069	101.812	97.576	99.6373		98.981	1.04063			566.478		25746	28315	31920	31976	41594			87.1063	92.3817	90.0525	88.9854	97.0032		91.1058	1.70308
571.485		16327	17320	18902	18953	24627			95.4014	99.672	101.656	97.7513	100.355		98.9671	1.09193			571.485		25664	28426	31828	31796	41630			86.8288	92.7439	89.7929	88.4844	97.0871		90.9874	1.80662
576.491		16342	17266	18951	18930	24498			95.4891	99.3612	101.92	97.6327	99.8289		98.8464	1.08217			576.491		25743	28138	31799	31794	41577			87.0961	91.8042	89.7111	88.4789	96.9635		90.8108	1.72176
581.495		16330	17403	18876	18898	24537			95.419	100.15	101.517	97.4676	99.9878		98.9081	1.08996			581.495		25747	28051	31658	31812	41582			87.1097	91.5204	89.3133	88.529	96.9752		90.6895	1.72594
586.501		16376	17281	18792	18932	24415			95.6877	99.4476	101.065	97.643	99.4906		98.6668	0.920927			586.501		25701	28225	31765	31804	41640			86.954	92.0881	89.6152	88.5067	97.1105		90.8549	1.77371
591.51		16314	17285	18836	18916	24477			95.3255	99.4706	101.302	97.5605	99.7433		98.6803	1.02796			591.51		25775	28208	31632	31769	41459			87.2044	92.0326	89.24	88.4093	96.6884		90.7149	1.69165
596.516		16327	17294	18879	18920	24521			95.4014	99.5224	101.533	97.5811	99.9226		98.7921	1.0556			596.516		25680	28205	31694	31836	41666			86.883	92.0228	89.4149	88.5958	97.1711		90.8175	1.79172
601.522		16282	17367	18893	18974	24388			95.1385	99.9424	101.608	97.8596	99.3806		98.7858	1.09127			601.522		25600	28157	31558	31772	41566			86.6123	91.8662	89.0312	88.4176	96.9379		90.5731	1.80131
606.526		16275	17339	18861	18975	24560			95.0976	99.7813	101.436	97.8648	100.082		98.8522	1.09823			606.526		25686	28154	31622	31850	41524			86.9033	91.8564	89.2118	88.6347	96.8399		90.6892	1.73106
611.533		16252	17338	18947	18933	24424			94.9632	99.7756	101.898	97.6482	99.5273		98.7625	1.16452			611.533		25501	27994	31683	31620	41545			86.2774	91.3344	89.3838	87.9947	96.8889		90.3758	1.82744
616.548		16357	17223	18905	18934	24524			95.5767	99.1138	101.673	97.6533	99.9348		98.7902	1.03301			616.548		25575	28177	31563	31659	41550			86.5277	91.9315	89.0453	88.1032	96.9006		90.5017	1.8256
621.559		16299	17310	18834	18948	24622			95.2378	99.6144	101.291	97.7255	100.334		98.8405	1.07368			621.559		25486	28177	31402	31731	41550			86.2266	91.9315	88.5911	88.3036	96.9006		90.3907	1.86664
626.562		16271	17400	18939	19064	24551			95.0742	100.132	101.855	98.3238	100.045		99.0861	1.14803			626.562		25497	28042	31290	31721	41487			86.2638	91.491	88.2751	88.2757	96.7537		90.2119	1.83736
631.57		16374	17370	18927	18910	24484			95.6761	99.9597	101.791	97.5295	99.7718		98.9456	1.06071			631.57		25653	28024	31404	31668	41631			86.7916	91.4323	88.5967	88.1282	97.0895		90.4077	1.83368
636.577		16367	17317	18914	18973	24426			95.6351	99.6547	101.721	97.8544	99.5354		98.8802	1.0169			636.577		25391	28018	31286	31565	41601			85.9052	91.4127	88.2638	87.8416	97.0195		90.0886	1.94513
641.569		16291	17487	18932	18985	24573			95.1911	100.633	101.818	97.9163	100.135		99.1385	1.17218			641.569		25444	28049	31268	31621	41595			86.0845	91.5139	88.2131	87.9974	97.0055		90.1629	1.92056
646.576		16355	17313	18877	18987	24596			95.565	99.6317	101.522	97.9267	100.228		98.9747	1.02995			646.576		25496	27987	31015	31653	41412			86.2605	91.3116	87.4993	88.0865	96.5787		89.9473	1.85588
651.583		16209	17297	18911	18962	24437			94.7119	99.5396	101.705	97.7977	99.5803		98.6669	1.16667			651.583		25358	28037	31080	31729	41510			85.7935	91.4747	87.6827	88.298	96.8073		90.0112	1.92969
656.589		16270	17346	19044	18971	24552			95.0684	99.8216	102.42	97.8441	100.049		99.0406	1.23			656.589		25368	28005	31161	31724	41501			85.8274	91.3703	87.9112	88.2841	96.7863		90.0359	1.90583
661.597		16365	17361	18952	19090	24564			95.6235	99.9079	101.925	98.4579	100.098		99.2025	1.05065			661.597		25318	28057	31014	31610	41437			85.6582	91.54	87.4965	87.9668	96.6371		89.8597	1.94391
666.603		16315	17343	18932	18975	24580			95.3313	99.8043	101.818	97.8648	100.163		98.9962	1.11102			666.603		25268	27989	30950	31657	41378			85.4891	91.3181	87.3159	88.0976	96.4994		89.744	1.93423
671.61		16251	17364	18960	18986	24556			94.9573	99.9252	101.968	97.9215	100.065		98.9675	1.1896			671.61		25289	27982	30950	31649	41393			85.5601	91.2953	87.3159	88.0754	96.5344		89.7562	1.93262
676.617		16334	17220	18940	18990	24617			95.4423	99.0965	101.861	97.9421	100.314		98.9311	1.08793			676.617		25384	28020	30760	31610	41225			85.8815	91.4193	86.7799	87.9668	96.1426		89.638	1.87824
681.627		16393	17286	18925	19085	24549			95.7871	99.4763	101.78	98.4321	100.037		99.1025	0.990543			681.627		25444	27931	30803	31504	41331			86.0845	91.1289	86.9012	87.6718	96.3898		89.6353	1.89464
686.634		16368	17338	18898	18987	24548			95.641	99.7756	101.635	97.9267	100.033		99.0021	1.0258			686.634		25246	28026	30789	31558	41331			85.4146	91.4388	86.8617	87.8221	96.3898		89.5854	1.97052
691.641		16367	17277	18882	19060	24409			95.6351	99.4245	101.549	98.3032	99.4662		98.8756	0.965009			691.641		25250	27915	30756	31430	41255			85.4282	91.0767	86.7686	87.4659	96.2126		89.3904	1.94503
696.647		16401	17359	18966	18988	24553			95.8338	99.8964	102.001	97.9318	100.053		99.1431	1.04831			696.647		25325	27977	30633	31525	41360			85.6819	91.279	86.4216	87.7303	96.4575		89.514	1.98439
701.654		16342	17367	18960	18996	24582			95.4891	99.9424	101.968	97.9731	100.171		99.1088	1.10438			701.654		25166	27767	30720	31445	41207			85.144	90.5938	86.667	87.5076	96.1007		89.2026	1.94027
706.66		16309	17387	18920	19018	24656			95.2963	100.058	101.753	98.0865	100.473		99.1333	1.12542			706.66		25205	27830	30488	31477	41375			85.2759	90.7994	86.0125	87.5967	96.4925		89.2354	2.04769
711.666		16275	17386	18957	19044	24509			95.0976	100.052	101.952	98.2206	99.8737		99.0392	1.14921			711.666		25248	27917	30634	31528	41303			85.4214	91.0832	86.4244	87.7386	96.3245		89.3984	1.9777
716.673		16332	17342	18875	18993	24528			95.4306	99.7986	101.511	97.9576	99.9511		98.9298	1.04045			716.673		25288	27954	30465	31502	41223			85.5567	91.2039	85.9476	87.6663	96.138		89.3025	1.97866
721.679		16324	17352	18932	19058	24534			95.3839	99.8561	101.818	98.2929	99.9755		99.0652	1.07656			721.679		25212	27841	30524	31461	41361			85.2996	90.8352	86.1141	87.5522	96.4598		89.2522	2.0349
726.687		16242	17269	18857	19037	24553			94.9048	99.3785	101.414	98.1845	100.053		98.787	1.10206			726.687		25305	27936	30538	31441	41181			85.6142	91.1452	86.1536	87.4965	96.04		89.2899	1.94383
731.692		16295	17369	18904	19155	24465			95.2144	99.954	101.667	98.7931	99.6944		99.0646	1.06908			731.692		25313	27867	30355	31395	41288			85.6413	90.9201	85.6373	87.3685	96.2896		89.1714	2.02395
736.699		16344	17349	18919	19047	24494			95.5008	99.8389	101.748	98.2361	99.8126		99.0272	1.04258			736.699		25209	27817	30390	31374	41133			85.2894	90.7569	85.7361	87.3101	95.9281		89.0041	1.97943
741.707		16337	17342	18955	18931	24614			95.4599	99.7986	101.942	97.6378	100.302		99.0279	1.12624			741.707		25219	27805	30410	31417	41357			85.3233	90.7178	85.7925	87.4297	96.4505		89.1427	2.05707
746.713		16300	17350	19008	19102	24458			95.2437	99.8446	102.227	98.5198	99.6659		99.1001	1.13705			746.713		25158	27874	30164	31266	41317			85.1169	90.9429	85.0985	87.0095	96.3572		88.905	2.14617
751.728		16288	17265	19039	19023	24460			95.1735	99.3555	102.393	98.1123	99.674		98.9417	1.17276			751.728		25302	27762	30244	31423	41282			85.6041	90.5775	85.3242	87.4464	96.2756		89.0455	2.03555
756.736		16225	17357	19016	19068	24633			94.8054	99.8849	102.269	98.3444	100.379		99.1367	1.2511			756.736		25208	27805	30306	31251	41101			85.2861	90.7178	85.4991	86.9678	95.8534		88.8648	2.00011
761.743		16345	17383	18957	19029	24437			95.5066	100.034	101.952	98.1433	99.5803		99.0434	1.07356			761.743		25208	27682	30248	31247	41076			85.2861	90.3165	85.3354	86.9566	95.7951		88.738	1.98697
766.751		16253	17303	18993	19063	24568			94.969	99.5742	102.146	98.3186	100.114		99.0244	1.18696			766.751		25184	27780	30168	31103	41274			85.2049	90.6362	85.1097	86.5559	96.2569		88.7527	2.12773
771.755		16305	17327	18897	18995	24521			95.2729	99.7123	101.63	97.9679	99.9226		98.901	1.07659			771.755		25264	27544	30173	31199	41095			85.4755	89.8662	85.1239	86.8231	95.8395		88.6256	1.98763
776.761		16314	17303	19033	19065	24461			95.3255	99.5742	102.361	98.329	99.6781		99.0535	1.1407			776.761		25227	27696	30072	31161	41176			85.3503	90.3621	84.8389	86.7173	96.0284		88.6594	2.07989
781.769		16309	17325	18937	19026	24567			95.2963	99.7007	101.845	98.1278	100.11		99.0159	1.1021			781.769		25244	27722	30135	31153	41104			85.4079	90.447	85.0166	86.695	95.8604		88.6854	2.03406
786.776		16352	17428	19056	18970	24567			95.5475	100.293	102.485	97.839	100.11		99.2549	1.18303			786.776		25208	27613	29935	31099	41184			85.2861	90.0914	84.4524	86.5448	96.047		88.4843	2.1216
791.783		16286	17317	19127	19013	24474			95.1619	99.6547	102.867	98.0608	99.731		99.095	1.25462			791.783		25135	27633	29954	31237	41188			85.0391	90.1566	84.506	86.9288	96.0563		88.5374	2.12408
796.789		16277	17356	19050	19016	24491			95.1093	99.8791	102.452	98.0762	99.8003		99.0635	1.21044			796.789		25141	27503	29944	31153	41007			85.0594	89.7325	84.4778	86.695	95.6342		88.3198	2.04362
801.797		16356	17369	19066	18989	24454			95.5709	99.954	102.538	97.937	99.6496		99.13	1.1545			801.797		25077	27529	30055	31041	41066			84.8428	89.8173	84.7909	86.3834	95.7718		88.3213	2.07445
806.803		16323	17252	18958	19068	24388			95.3781	99.2807	101.958	98.3444	99.3806		98.8683	1.05907			806.803		25099	27649	29881	30985	41172			84.9173	90.2088	84.3001	86.2275	96.019		88.3345	2.17897
811.811		16355	17289	19063	18993	24461			95.565	99.4936	102.522	97.9576	99.6781		99.0433	1.13987			811.811		25103	27590	29840	30960	41156			84.9308	90.0163	84.1844	86.158	95.9817		88.2542	2.17741
816.817		16343	17256	18903	18942	24477			95.4949	99.3037	101.662	97.6946	99.7433		98.7796	1.03626			816.817		25180	27532	29688	30936	41060			85.1913	89.8271	83.7556	86.0912	95.7578		88.1246	2.15629
821.825		16298	17354	19010	19072	24450			95.232	99.8676	102.237	98.365	99.6333		99.067	1.14483			821.825		25146	27539	29654	30813	41009			85.0763	89.8499	83.6596	85.7489	95.6389		87.9947	2.17059
826.831		16342	17348	19017	18990	24357			95.4891	99.8331	102.275	97.9421	99.2543		98.9587	1.11626			826.831		25072	27536	29607	31059	40942			84.8259	89.8401	83.5271	86.4335	95.4826		88.0218	2.14371
831.838		16277	17251	18925	19086	24595			95.1093	99.2749	101.78	98.4373	100.224		98.9651	1.11246			831.838		24954	27364	29724	30811	41027			84.4267	89.279	83.8571	85.7433	95.6809		87.7974	2.18461
836.844		16377	17363	18998	19093	24489			95.6936	99.9194	102.173	98.4734	99.7922		99.2103	1.06131			836.844		25164	27387	29592	30919	40870			85.1372	89.354	83.4847	86.0439	95.3147		87.8669	2.09356
841.851		16356	17393	18839	19046	24489			95.5709	100.092	101.318	98.231	99.7922		99.0007	0.988478			841.851		24951	27415	29437	30781	40959			84.4166	89.4454	83.0474	85.6598	95.5223		87.6183	2.24489
846.858		16344	17371	19062	19086	24395			95.5008	99.9655	102.517	98.4373	99.4091		99.1659	1.1378			846.858		24961	27450	29517	30823	40764			84.4504	89.5595	83.2732	85.7767	95.0675		87.6255	2.1397
851.865		16289	17353	18997	19025	24517			95.1794	99.8619	102.167	98.1226	99.9063		99.0475	1.16086			851.865		25026	27320	29452	30734	40938			84.6703	89.1354	83.0898	85.529	95.4733		87.5796	2.2086
856.873		16274	17334	19036	18974	24474			95.0917	99.7525	102.377	97.8596	99.731		98.9624	1.20568			856.873		25031	27329	29499	30822	40842			84.6872	89.1648	83.2224	85.7739	95.2494		87.6195	2.14409
861.881		16338	17387	18947	19107	24398			95.4657	100.058	101.898	98.5456	99.4214		99.0777	1.05747			861.881		25017	27338	29492	30775	40881			84.6398	89.1941	83.2026	85.6431	95.3404		87.604	2.17237
866.887		16386	17420	19010	19115	24350			95.7462	100.248	102.237	98.5868	99.2258		99.2087	1.06366			866.887		24926	27366	29354	30702	40785			84.332	89.2855	82.8133	85.44	95.1165		87.3974	2.20671
871.894		16303	17388	19019	19044	24461			95.2612	100.063	102.286	98.2206	99.6781		99.1018	1.16018			871.894		24977	27191	29390	30565	40854			84.5045	88.7145	82.9149	85.0587	95.2774		87.294	2.21029
876.902		16229	17366	18957	19008	24334			94.8288	99.9367	101.952	98.035	99.1606		98.7826	1.17713			876.902		24911	27178	29366	30523	40925			84.2812	88.6721	82.8471	84.9418	95.443		87.2371	2.26576
881.918		16261	17305	18883	19162	24405			95.0158	99.5857	101.554	98.8292	99.4499		98.887	1.07026			881.918		24943	27152	29241	30507	40822			84.3895	88.5873	82.4945	84.8973	95.2028		87.1143	2.25028
886.925		16331	17317	18986	19073	24433			95.4248	99.6547	102.108	98.3702	99.564		99.0244	1.08589			886.925		24995	27111	29111	30411	40790			84.5654	88.4535	82.1277	84.6302	95.1282		86.981	2.27442
891.931		16371	17343	18869	19094	24365			95.6585	99.8043	101.479	98.4785	99.2869		98.9415	0.956424			891.931		24913	27155	29159	30393	40653			84.288	88.5971	82.2632	84.5801	94.8087		86.9074	2.22634
896.937		16280	17397	19092	19041	24301			95.1268	100.115	102.678	98.2052	99.0261		99.0303	1.23294			896.937		24928	27008	29135	30463	40697			84.3387	88.1175	82.1954	84.7749	94.9113		86.8676	2.22336
901.942		16354	17272	19016	19064	24367			95.5592	99.3958	102.269	98.3238	99.295		98.9687	1.07761			901.942		24920	27065	29006	30380	40714			84.3117	88.3034	81.8315	84.5439	94.9509		86.7883	2.28762
906.949		16336	17353	19027	19175	24337			95.454	99.8619	102.329	98.8963	99.1728		99.1427	1.10308			906.949		24983	27045	28992	30356	40641			84.5248	88.2382	81.792	84.4771	94.7807		86.7626	2.25172
911.954		16405	17304	18947	19145	24346			95.8572	99.5799	101.898	98.7416	99.2095		99.0573	0.967189			911.954		24934	26996	28959	30297	40637			84.359	88.0783	81.6989	84.3129	94.7713		86.6441	2.27178
916.961		16259	17385	18983	19075	24414			95.0041	100.046	102.092	98.3805	99.4865		99.0019	1.16711			916.961		24876	26985	28942	30174	40563			84.1628	88.0424	81.651	83.9706	94.5987		86.4851	2.27312
921.97		16369	17389	19073	19083	24348			95.6468	100.069	102.576	98.4218	99.2176		99.1863	1.12657			921.97		24964	26870	28876	30240	40370			84.4605	87.6672	81.4648	84.1543	94.1487		86.3791	2.17723
926.979		16373	17390	18920	19125	24328			95.6702	100.075	101.753	98.6384	99.1361		99.0546	0.998943			926.979		24836	26824	28816	30180	40575			84.0275	87.5171	81.2955	83.9873	94.6267		86.2908	2.30623
931.986		16373	17338	18944	19054	24486			95.6702	99.7756	101.882	98.2722	99.7799		99.076	1.02727			931.986		24794	26797	29050	30207	40378			83.8854	87.429	81.9557	84.0624	94.1673		86.3	2.15499
936.994		16266	17365	18985	19074	24309			95.045	99.9309	102.103	98.3754	99.0587		98.9026	1.1507			936.994		24765	26899	28956	30124	40421			83.7873	87.7618	81.6905	83.8315	94.2676		86.2677	2.22789
942.001		16363	17325	19114	19080	24307			95.6118	99.7007	102.797	98.4063	99.0505		99.1132	1.15491			942.001		24838	26892	28745	30038	40417			84.0342	87.739	81.0952	83.5921	94.2583		86.1438	2.28953
947.008		16349	17329	19066	19171	24350			95.53	99.7238	102.538	98.8756	99.2258		99.1787	1.11787			947.008		24695	26799	28835	29919	40468			83.5504	87.4356	81.3491	83.261	94.3772		85.9947	2.31702
952.015		16411	17455	19007	19159	24369			95.8923	100.449	102.221	98.8138	99.3032		99.3358	1.04153			952.015		24719	26809	28821	30022	40412			83.6316	87.4682	81.3096	83.5476	94.2466		86.0407	2.2779
957.021		16247	17343	18951	19197	24476			94.934	99.8043	101.92	99.0097	99.7392		99.0815	1.14497			957.021		24693	26824	28691	29927	40236			83.5437	87.5171	80.9428	83.2832	93.8361		85.8246	2.26431
962.032		16279	17403	18987	19055	24368			95.1209	100.15	102.114	98.2774	99.2991		98.9921	1.15487			962.032		24670	26813	28762	29745	40244			83.4659	87.4812	81.1432	82.7768	93.8548		85.7444	2.27997
967.038		16169	17430	19071	19089	24409			94.4782	100.305	102.565	98.4527	99.4662		99.0535	1.32973			967.038		24769	26845	28664	29686	40291			83.8008	87.5856	80.8667	82.6126	93.9644		85.766	2.32739
972.044		16340	17409	19085	19179	24369			95.4774	100.184	102.641	98.9169	99.3032		99.3045	1.15543			972.044		24664	26854	28708	29772	40219			83.4455	87.615	80.9908	82.8519	93.7965		85.74	2.28674
977.051		16330	17424	18966	19072	24354			95.419	100.27	102.001	98.365	99.2421		99.0594	1.09283			977.051		24561	26937	28789	29695	40285			83.0971	87.8858	81.2193	82.6376	93.9504		85.758	2.33517
982.058		16316	17436	18968	19093	24328			95.3371	100.34	102.011	98.4734	99.1361		99.0595	1.10809			982.058		24564	26786	28761	29592	40142			83.1072	87.3932	81.1403	82.351	93.6169		85.5217	2.28161
987.065		16309	17371	19074	19097	24291			95.2963	99.9655	102.582	98.494	98.9853		99.0645	1.17713			987.065		24493	26758	28656	29632	40043			82.867	87.3018	80.8441	82.4623	93.386		85.3722	2.27148
992.071		16406	17554	19102	19128	24327			95.863	101.019	102.732	98.6539	99.132		99.4799	1.15822			992.071		24590	26959	28775	29585	40244			83.1952	87.9576	81.1798	82.3315	93.8548		85.7038	2.34148
997.076		16332	17523	18970	19036	24362			95.4306	100.84	102.022	98.1794	99.2746		99.1494	1.13793			997.076		24538	26917	28842	29529	40129			83.0192	87.8205	81.3688	82.1757	93.5866		85.5942	2.29135
1002.08		16261	17483	19071	19106	24208			95.0158	100.61	102.565	98.5404	98.6471		99.0757	1.25468			1002.08		24561	27016	28703	29476	40115			83.0971	88.1436	80.9767	82.0282	93.554		85.5599	2.34654
1007.09		16303	17448	19114	19093	24338			95.2612	100.409	102.797	98.4734	99.1769		99.2233	1.23362			1007.09		24385	27095	28627	29502	40126			82.5016	88.4013	80.7623	82.1005	93.5796		85.4691	2.41543
1012.1		16402	17485	19126	19143	24308			95.8397	100.621	102.861	98.7312	99.0546		99.4216	1.15567			1012.1		24416	26950	28864	29414	40265			82.6065	87.9282	81.4309	81.8556	93.9038		85.545	2.39501
1017.1		16439	17453	18982	19097	24207			96.0559	100.437	102.087	98.494	98.643		99.1434	1.01347			1017.1		24463	27068	28674	29311	40184			82.7655	88.3132	80.8949	81.569	93.7149		85.4515	2.44463
1022.12		16340	17431	19071	19028	24288			95.4774	100.311	102.565	98.1381	98.9731		99.0929	1.17343			1022.12		24449	27086	28768	29349	40167			82.7181	88.3719	81.1601	81.6747	93.6752		85.52	2.41129
1027.12		16294	17481	19109	19171	24286			95.2086	100.599	102.77	98.8756	98.965		99.2835	1.24007			1027.12		24375	26984	28718	29473	39977			82.4678	88.0392	81.019	82.0198	93.2321		85.3556	2.31856
1032.13		16330	17457	18940	19146	24330			95.419	100.46	101.861	98.7467	99.1442		99.1262	1.07578			1032.13		24480	27042	28757	29253	40085			82.823	88.2284	81.129	81.4076	93.484		85.4144	2.38926
1037.13		16411	17438	19006	19157	24233			95.8923	100.351	102.216	98.8034	98.749		99.2023	1.04215			1037.13		24361	26894	28734	29162	39895			82.4204	87.7455	81.0641	81.1543	93.0409		85.0851	2.33551
1042.14		16409	17417	18948	19138	24290			95.8806	100.23	101.904	98.7054	98.9813		99.1403	0.991591			1042.14		24426	26961	28697	29229	40068			82.6403	87.9641	80.9598	81.3408	93.4443		85.2699	2.39802
1047.15		16520	17418	19004	19119	24205			96.5292	100.236	102.205	98.6075	98.6349		99.2425	0.94599			1047.15		24395	26864	28726	29173	39931			82.5354	87.6476	81.0416	81.185	93.1248		85.1069	2.33734
1052.16		16464	17513	18952	19093	24145			96.2019	100.783	101.925	98.4734	98.3904		99.1547	1.00235			1052.16		24254	26845	28549	29148	39871			82.0584	87.5856	80.5422	81.1154	92.9849		84.8573	2.38702
1057.16		16464	17420	18982	19106	24210			96.2019	100.248	102.087	98.5404	98.6553		99.1464	0.978163			1057.16		24288	26755	28621	29219	39948			82.1734	87.292	80.7454	81.313	93.1645		84.9377	2.36197
1062.17		16440	17437	18861	19222	24252			96.0617	100.345	101.436	99.1387	98.8264		99.1616	0.902658			1062.17		24430	26646	28643	29056	39661			82.6539	86.9364	80.8074	80.8594	92.4952		84.7504	2.23431
1067.18		16416	17511	19044	19066	24317			95.9215	100.771	102.42	98.3341	99.0913		99.3076	1.10204			1067.18		24227	26691	28598	29050	39649			81.9671	87.0832	80.6805	80.8427	92.4672		84.6081	2.28551
1072.19		16320	17433	19110	19077	24308			95.3605	100.322	102.775	98.3908	99.0546		99.1807	1.2136			1072.19		24337	26696	28650	29088	39767			82.3392	87.0995	80.8272	80.9484	92.7424		84.7913	2.29175
1077.2		16302	17444	18864	19093	24193			95.2554	100.386	101.452	98.4734	98.586		98.8305	1.05499			1077.2		24358	26580	28601	28942	39768			82.4103	86.721	80.6889	80.5421	92.7447		84.6214	2.31722
1082.21		16356	17397	18987	19203	24065			95.5709	100.115	102.114	99.0407	98.0644		98.9809	1.08563			1082.21		24281	26612	28581	28897	39731			82.1497	86.8255	80.6325	80.4169	92.6584		84.5366	2.33574
1087.21		16427	17390	18969	19161	24232			95.9857	100.075	102.017	98.8241	98.7449		99.1293	0.98373			1087.21		24256	26506	28499	29002	39643			82.0652	86.4796	80.4012	80.7091	92.4532		84.4216	2.28299
1092.22		16447	17473	19015	19193	24216			96.1026	100.552	102.264	98.9891	98.6797		99.3176	1.02612			1092.22		24417	26390	28451	29019	39717			82.6099	86.1011	80.2658	80.7564	92.6258		84.4718	2.28149
1097.23		16423	17447	18901	19038	24198			95.9624	100.403	101.651	98.1897	98.6064		98.9625	0.975394			1097.23		24415	26373	28371	28909	39607			82.6031	86.0457	80.0401	80.4503	92.3692		84.3017	2.28043
1102.23		16396	17538	19031	19095	24371			95.8046	100.927	102.35	98.4837	99.3113		99.3753	1.11367			1102.23		24329	26371	28473	28858	39608			82.3121	86.0392	80.3278	80.3083	92.3716		84.2718	2.27853
1107.24		16477	17497	19030	19135	24198			96.2779	100.691	102.345	98.69	98.6064		99.3219	1.02928			1107.24		24361	26372	28468	28844	39494			82.4204	86.0424	80.3137	80.2694	92.1057		84.2303	2.2317
1112.24		16408	17524	18972	19082	24289			95.8747	100.846	102.033	98.4166	98.9772		99.2295	1.0595			1112.24		24456	26379	28433	28940	39509			82.7418	86.0653	80.215	80.5365	92.1407		84.3398	2.21205
1117.25		16373	17543	18913	19190	24164			95.6702	100.955	101.716	98.9736	98.4678		99.1565	1.0594			1117.25		24458	26184	28404	28835	39372			82.7486	85.429	80.1332	80.2443	91.8212		84.0753	2.16573
1122.26		16403	17480	18855	19248	24180			95.8455	100.593	101.404	99.2728	98.533		99.1295	0.961089			1122.26		24426	26290	28202	28830	39424			82.6403	85.7749	79.5633	80.2304	91.9424		84.0303	2.258
1127.27		16505	17556	18895	19145	24235			96.4415	101.03	101.619	98.7416	98.7571		99.3178	0.925906			1127.27		24362	26279	28136	28702	39443			82.4238	85.739	79.3771	79.8742	91.9868		83.8802	2.31968
1132.27		16430	17454	18935	19178	24256			96.0033	100.443	101.834	98.9117	98.8427		99.2069	0.972428			1132.27		24392	26182	27976	28722	39445			82.5253	85.4225	78.9257	79.9299	91.9914		83.759	2.34612
1137.28		16440	17494	19058	19132	24311			96.0617	100.673	102.495	98.6745	99.0668		99.3943	1.07201			1137.28		24293	26192	27861	28658	39432			82.1903	85.4551	78.6012	79.7518	91.9611		83.5919	2.3993
1142.29		16492	17513	18970	19097	24259			96.3655	100.783	102.022	98.494	98.8549		99.3039	0.9764			1142.29		24547	26094	27883	28755	39322			83.0497	85.1354	78.6633	80.0217	91.7046		83.7149	2.29623
1147.29		16487	17522	18994	19020	24178			96.3363	100.834	102.151	98.0969	98.5249		99.1887	1.03086			1147.29		24292	26058	27804	28640	39336			82.187	85.0179	78.4404	79.7017	91.7372		83.4168	2.36508
1152.3		16471	17495	18980	19111	24288			96.2428	100.679	102.076	98.5662	98.9731		99.3074	0.989919			1152.3		24243	26087	27833	28691	39217			82.0212	85.1126	78.5223	79.8436	91.4597		83.3919	2.3047
1157.31		16503	17477	19088	19130	24301			96.4298	100.576	102.657	98.6642	99.0261		99.4705	1.03602			1157.31		24221	26047	27623	28703	39355			81.9467	84.9821	77.9298	79.877	91.7815		83.3034	2.42025
1162.32		16406	17585	18988	19113	24252			95.863	101.197	102.119	98.5765	98.8264		99.3164	1.09783			1162.32		24363	26133	27741	28599	39230			82.4272	85.2626	78.2627	79.5876	91.49		83.406	2.35362
1167.32		16446	17450	19014	19159	24354			96.0968	100.42	102.259	98.8138	99.2421		99.3663	1.01212			1167.32		24216	26039	27734	28565	39268			81.9298	84.956	78.243	79.493	91.5786		83.2401	2.37912
1172.33		16458	17500	19058	19106	24306			96.1669	100.708	102.495	98.5404	99.0464		99.3914	1.06321			1172.33		24195	26036	27656	28605	39196			81.8588	84.9462	78.0229	79.6043	91.4107		83.1686	2.36633
1177.34		16431	17458	19139	19187	24160			96.0091	100.466	102.931	98.9582	98.4515		99.3632	1.14436			1177.34		24024	25916	27586	28430	39149			81.2802	84.5546	77.8254	79.1173	91.3011		82.8157	2.40795
1182.34		16525	17508	19031	19138	24194			96.5584	100.754	102.35	98.7054	98.5901		99.3916	0.993721			1182.34		23899	25902	27662	28539	39168			80.8573	84.509	78.0398	79.4206	91.3454		82.8344	2.38529
1187.35		16455	17434	19020	19059	24211			96.1493	100.328	102.291	98.298	98.6593		99.1452	1.03016			1187.35		24044	25960	27613	28444	39233			81.3479	84.6982	77.9016	79.1562	91.497		82.9202	2.43463
1192.35		16458	17560	19064	19123	24214			96.1669	101.053	102.528	98.6281	98.6716		99.4095	1.0976			1192.35		24001	25880	27596	28522	39026			81.2024	84.4372	77.8536	79.3733	91.0143		82.7762	2.33359
1197.37		16520	17604	19070	19088	24202			96.5292	101.306	102.56	98.4476	98.6227		99.4931	1.08003			1197.37		23954	26004	27460	28410	39217			81.0434	84.8418	77.4699	79.0616	91.4597		82.7753	2.49626
1202.37		16425	17453	19029	19172	24255			95.9741	100.437	102.34	98.8808	98.8386		99.2941	1.04839			1202.37		23869	25972	27412	28515	39156			80.7558	84.7374	77.3345	79.3538	91.3174		82.6998	2.4716
1207.38		16484	17480	19010	19163	24147			96.3188	100.593	102.237	98.8344	98.3985		99.2763	1.00531			1207.38		23808	25937	27498	28400	39126			80.5494	84.6232	77.5772	79.0338	91.2475		82.6062	2.45991
1212.39		16483	17496	19031	19106	24151			96.313	100.685	102.35	98.5404	98.4148		99.2606	1.03674			1212.39		23790	25791	27467	28436	39170			80.4886	84.1468	77.4897	79.134	91.3501		82.5218	2.46488
1217.39		16573	17419	18978	19082	24224			96.8388	100.242	102.065	98.4166	98.7123		99.2549	0.88617			1217.39		23845	25841	27296	28457	39192			80.6746	84.31	77.0073	79.1924	91.4014		82.5171	2.51944
1222.4		16554	17611	19003	19166	24222			96.7278	101.347	102.2	98.8499	98.7042		99.5656	0.985323			1222.4		23752	25883	27339	28326	39068			80.36	84.447	77.1286	78.8278	91.1122		82.3751	2.49799
1227.41		16517	17385	19144	19156	24338			96.5116	100.046	102.958	98.7983	99.1769		99.4981	1.04361			1227.41		23713	25869	27280	28338	38946			80.228	84.4013	76.9621	78.8612	90.8277		82.2561	2.46716
1232.41		16474	17400	19095	19117	24134			96.2604	100.132	102.694	98.5971	98.3456		99.206	1.06806			1232.41		23792	25794	27311	28347	39074			80.4953	84.1566	77.0496	78.8863	91.1262		82.3428	2.48814
1237.42		16423	17283	18979	19046	24226			95.9624	99.4591	102.071	98.231	98.7205		98.8887	0.986766			1237.42		23700	25798	27359	28327	39045			80.184	84.1697	77.185	78.8306	91.0586		82.2856	2.47875
1242.44		16572	17412	19054	18982	24226			96.833	100.201	102.474	97.9009	98.7205		99.2259	0.980771			1242.44		23677	25725	27339	28388	38904			80.1062	83.9315	77.1286	79.0004	90.7297		82.1793	2.40928
1247.44		16492	17357	18993	19061	24098			96.3655	99.8849	102.146	98.3083	98.1989		98.9807	0.967948			1247.44		23561	25636	27214	28401	39024			79.7138	83.6411	76.7759	79.0366	91.0096		82.0354	2.50159
1252.44		16527	17374	19095	19090	24208			96.5701	99.9827	102.694	98.4579	98.6471		99.2704	1.01419			1252.44		23587	25739	27156	28310	38977			79.8017	83.9772	76.6123	78.7833	90.9		82.0149	2.52313
1257.45		16565	17262	19167	19124	24280			96.7921	99.3382	103.082	98.6333	98.9405		99.3571	1.02832			1257.45		23550	25738	27049	28262	39019			79.6766	83.9739	76.3104	78.6497	90.9979		81.9217	2.58671
1262.46		16446	17172	19016	19211	24250			96.0968	98.8203	102.269	99.082	98.8183		99.0173	0.979514			1262.46		23485	25616	27185	28231	39040			79.4566	83.5759	76.6941	78.5635	91.0469		81.8674	2.55609
1267.47		16403	17230	19019	19008	24398			95.8455	99.154	102.286	98.035	99.4214		98.9483	1.04561			1267.47		23458	25731	27071	28191	38984			79.3653	83.9511	76.3725	78.4522	90.9163		81.8115	2.59159
1272.48		16409	17164	19261	18980	24372			95.8806	98.7742	103.587	97.8906	99.3154		99.0896	1.26717			1272.48		23525	25778	27097	28186	39003			79.592	84.1044	76.4459	78.4382	90.9606		81.9082	2.58855
1277.48		16383	17103	19045	19070	24316			95.7286	98.4232	102.425	98.3547	99.0872		98.8039	1.07238			1277.48		23555	25644	27186	28177	38992			79.6935	83.6672	76.697	78.4132	90.935		81.8812	2.53821
1282.49		16422	17317	19064	18989	24348			95.9565	99.6547	102.528	97.937	99.2176		99.0587	1.07926			1282.49		23479	25592	27036	28204	38713			79.4363	83.4976	76.2738	78.4883	90.2843		81.5961	2.46729
1287.49		16423	17193	19087	19149	24239			95.9624	98.9411	102.651	98.7622	98.7734		99.0181	1.06465			1287.49		23417	25665	27015	28135	38796			79.2266	83.7357	76.2145	78.2963	90.4779		81.5902	2.53898
1292.5		16423	17242	19115	19082	24399			95.9624	99.2231	102.802	98.4166	99.4254		99.1659	1.09809			1292.5		23540	25602	26990	28187	38820			79.6427	83.5302	76.144	78.441	90.5338		81.6583	2.52091
1297.51		16328	17208	19063	18969	24414			95.4073	99.0275	102.522	97.8338	99.4865		98.8555	1.15774			1297.51		23542	25698	27007	28212	38861			79.6495	83.8434	76.192	78.5106	90.6295		81.765	2.53992
1302.52		16501	17193	19142	19106	24327			96.4181	98.9411	102.947	98.5404	99.132		99.1958	1.05562			1302.52		23352	25486	27001	28238	38872			79.0067	83.1517	76.175	78.583	90.6551		81.5143	2.54582
1307.52		16395	17135	19085	19079	24188			95.7988	98.6073	102.641	98.4012	98.5656		98.8027	1.09564			1307.52		23401	25574	26932	28138	38888			79.1724	83.4388	75.9804	78.3047	90.6924		81.5177	2.59183
1312.53		16484	17140	18902	19103	24271			96.3188	98.6361	101.656	98.5249	98.9038		98.808	0.849363			1312.53		23394	25509	26928	28263	38681			79.1488	83.2267	75.9691	78.6525	90.2097		81.4414	2.48042
1317.54		16549	17152	18956	19091	24213			96.6986	98.7052	101.947	98.463	98.6675		98.8962	0.848899			1317.54		23269	25546	26823	28172	38930			78.7258	83.3475	75.6728	78.3993	90.7904		81.3872	2.65449
1322.54		16407	17177	19053	19002	24275			95.8689	98.8491	102.469	98.004	98.9201		98.8221	1.0653			1322.54		23347	25519	26721	28147	38661			78.9898	83.2594	75.3851	78.3297	90.163		81.2254	2.56428
1327.55		16420	17192	18891	18916	24383			95.9448	98.9354	101.597	97.5605	99.3602		98.6796	0.942683			1327.55		23337	25494	26863	28194	38767			78.9559	83.1778	75.7857	78.4605	90.4102		81.358	2.55412
1332.55		16514	17208	19032	18965	24165			96.4941	99.0275	102.356	97.8132	98.4719		98.8324	0.976918			1332.55		23295	25486	26816	28003	38790			78.8138	83.1517	75.6531	77.929	90.4639		81.2023	2.61524
1337.56		16425	17229	19002	18766	24304			95.9741	99.1483	102.194	96.7868	99.0383		98.6284	1.08607			1337.56		23255	25448	26713	28081	38619			78.6785	83.0277	75.3625	78.1461	90.0651		81.056	2.56503
1342.57		16409	17166	19004	18849	24301			95.8806	98.7857	102.205	97.2149	99.0261		98.6225	1.06121			1342.57		23205	25443	26756	27990	38633			78.5093	83.0114	75.4838	77.8928	90.0977		80.999	2.57973
1347.58		16495	17142	18985	18908	24314			96.3831	98.6476	102.103	97.5192	99.079		98.7464	0.961174			1347.58		23156	25421	26796	28050	38596			78.3435	82.9396	75.5967	78.0598	90.0114		80.9902	2.54819
1352.58		16599	17082	18971	18888	24327			96.9908	98.3024	102.028	97.4161	99.132		98.7737	0.893303			1352.58		23224	25369	26699	28102	38492			78.5736	82.77	75.323	78.2045	89.7689		80.928	2.50929
1357.59		16570	17200	18975	18805	24402			96.8213	98.9814	102.049	96.988	99.4377		98.8555	0.953381			1357.59		23113	25342	26613	28000	38519			78.1981	82.6819	75.0804	77.9206	89.8319		80.7426	2.57754
1362.6		16498	17145	19042	18879	24339			96.4006	98.6649	102.409	97.3696	99.1809		98.8051	1.02455			1362.6		23212	25402	26616	27959	38619			78.533	82.8777	75.0889	77.8065	90.0651		80.8742	2.6158
1367.61		16492	17120	18952	18808	24334			96.3655	98.521	101.925	97.0035	99.1606		98.5952	0.972634			1367.61		23174	25316	26728	27960	38547			78.4044	82.5971	75.4048	77.8093	89.8971		80.8226	2.54731
1372.61		16478	17232	18938	18737	24337			96.2837	99.1656	101.85	96.6373	99.1728		98.6219	1.0106			1372.61		23172	25402	26444	27951	38669			78.3977	82.8777	74.6036	77.7843	90.1817		80.769	2.69804
1377.62		16517	17093	18874	18745	24349			96.5116	98.3657	101.506	96.6785	99.2217		98.4567	0.917504			1377.62		23056	25248	26640	27932	38554			78.0052	82.3752	75.1566	77.7314	89.9135		80.6364	2.59305
1382.62		16473	17072	19030	18758	24376			96.2545	98.2448	102.345	96.7456	99.3317		98.5843	1.08683			1382.62		23151	25298	26657	27984	38614			78.3266	82.5383	75.2045	77.8761	90.0534		80.7998	2.59445
1387.63		16493	17269	19001	18822	24401			96.3714	99.3785	102.189	97.0757	99.4336		98.8896	1.02596			1387.63		23048	25326	26570	28026	38407			77.9781	82.6297	74.9591	77.993	89.5707		80.6261	2.55029
1392.64		16538	17069	18981	18917	24357			96.6343	98.2275	102.081	97.5656	99.2543		98.7526	0.93551			1392.64		23093	25279	26386	27951	38491			78.1304	82.4763	74.44	77.7843	89.7665		80.5195	2.6409
1397.64		16444	17143	18959	18768	24331			96.0851	98.6534	101.963	96.7972	99.1483		98.5294	1.02868			1397.64		23122	25316	26385	27802	38442			78.2285	82.5971	74.4372	77.3696	89.6523		80.4569	2.64452
1402.65		16515	17177	18945	18836	24245			96.4999	98.8491	101.888	97.1479	98.7979		98.6365	0.933339			1402.65		23051	25457	26439	27911	38312			77.9883	83.0571	74.5895	77.673	89.3491		80.5314	2.58916
1407.66		16388	17154	18898	18770	24382			95.7579	98.7167	101.635	96.8075	99.3561		98.4546	1.02424			1407.66		23088	25209	26369	27930	38401			78.1135	82.248	74.392	77.7258	89.5567		80.4072	2.60513
1412.67		16433	17132	18871	18751	24260			96.0208	98.5901	101.49	96.7095	98.859		98.3338	0.956286			1412.67		23114	25235	26337	27914	38354			78.2014	82.3328	74.3017	77.6813	89.4471		80.3929	2.59806
1417.68		16371	17017	18997	18777	24311			95.6585	97.9283	102.167	96.8436	99.0668		98.3329	1.11302			1417.68		22905	25248	26308	27820	38438			77.4943	82.3752	74.2199	77.4197	89.6429		80.2304	2.68987
1422.68		16488	16982	18968	18754	24349			96.3422	97.7269	102.011	96.725	99.2217		98.4054	1.02982			1422.68		22882	25149	26427	27804	38409			77.4165	82.0522	74.5557	77.3752	89.5753		80.195	2.63546
1427.69		16446	17050	18893	18681	24383			96.0968	98.1182	101.608	96.3484	99.3602		98.3063	1.01889			1427.69		22873	25199	26236	27730	38287			77.3861	82.2153	74.0168	77.1693	89.2908		80.0157	2.66336
1432.69		16421	17001	18903	18826	24347			95.9507	97.8362	101.662	97.0963	99.2135		98.3517	0.982501			1432.69		22959	25192	26302	27848	38281			77.677	82.1925	74.203	77.4976	89.2768		80.1694	2.60754
1437.71		16503	17160	18867	18693	24286			96.4298	98.7512	101.468	96.4103	98.965		98.4049	0.940655			1437.71		22946	25171	26406	27832	38235			77.633	82.124	74.4964	77.4531	89.1695		80.1752	2.5575
1442.72		16378	17130	18856	18767	24327			95.6994	98.5786	101.409	96.792	99.132		98.3222	0.986685			1442.72		22962	25076	26226	27910	38256			77.6872	81.814	73.9886	77.6702	89.2185		80.0757	2.59959
1447.72		16354	17082	18813	18827	24281			95.5592	98.3024	101.178	97.1014	98.9446		98.2171	0.938387			1447.72		22954	25101	26163	27846	38124			77.6601	81.8956	73.8109	77.4921	88.9107		79.9539	2.57927
1452.73		16442	17050	18911	18812	24397			96.0734	98.1182	101.705	97.0241	99.4173		98.4676	0.982854			1452.73		22855	25093	26198	27887	38083			77.3252	81.8695	73.9096	77.6062	88.815		79.9051	2.56059
1457.74		16421	16963	18861	18826	24294			95.9507	97.6175	101.436	97.0963	98.9976		98.2196	0.941332			1457.74		22977	25121	26109	27913	38193			77.7379	81.9608	73.6585	77.6785	89.0716		80.0215	2.61588
1462.74		16385	17025	18776	18795	24301			95.7403	97.9743	100.979	96.9364	99.0261		98.1312	0.896605			1462.74		22700	25048	26236	27926	38109			76.8008	81.7227	74.0168	77.7147	88.8757		79.8261	2.57731
1467.75		16349	17023	18761	18741	24365			95.53	97.9628	100.898	96.6579	99.2869		98.0671	0.946998			1467.75		22976	25081	26283	27819	38090			77.7345	81.8303	74.1494	77.4169	88.8314		79.9925	2.52366
1472.76		16385	16893	18757	18716	24326			95.7403	97.2147	100.877	96.529	99.1279		97.8977	0.932243			1472.76		22883	24986	26261	27940	37985			77.4199	81.5204	74.0873	77.7537	88.5865		79.8736	2.47611
1477.77		16449	16985	18644	18730	24241			96.1143	97.7441	100.269	96.6012	98.7816		97.902	0.751294			1477.77		22820	24992	26030	27858	38088			77.2067	81.54	73.4356	77.5255	88.8267		79.7069	2.616
1482.78		16466	16968	18670	18834	24201			96.2136	97.6463	100.409	97.1376	98.6186		98.005	0.715695			1482.78		22826	24934	26103	27763	37983			77.2271	81.3507	73.6416	77.2611	88.5818		79.6125	2.55285
1487.79		16497	16974	18698	18688	24112			96.3948	97.6808	100.559	96.3846	98.2559		97.8551	0.768076			1487.79		22876	25092	25993	27769	37940			77.3962	81.8662	73.3313	77.2778	88.4815		79.6706	2.58398
1492.79		16558	16932	18714	18647	23924			96.7512	97.4391	100.645	96.1731	97.4898		97.6997	0.775219			1492.79		22879	24983	25967	27810	37905			77.4064	81.5106	73.2579	77.3919	88.3999		79.5933	2.55928
1497.8		16450	16986	18646	18612	23925			96.1201	97.7499	100.28	95.9926	97.4939		97.5272	0.773365			1497.8		22793	25052	26083	27667	37872			77.1154	81.7357	73.5852	76.9939	88.323		79.5506	2.54737
1502.81		16511	17007	18603	18691	23948			96.4766	97.8708	100.048	96.4	97.5876		97.6767	0.661089			1502.81		22714	24917	25951	27736	37891			76.8481	81.2953	73.2128	77.186	88.3673		79.3819	2.58552
1507.82		16598	17063	18707	18673	23902			96.9849	98.193	100.608	96.3072	97.4002		97.8986	0.743027			1507.82		22785	24933	25901	27696	37842			77.0883	81.3475	73.0717	77.0746	88.253		79.367	2.57838
1512.82		16478	16926	18549	18649	24056			96.2837	97.4046	99.758	96.1834	98.0277		97.5315	0.65551			1512.82		22740	25067	25882	27627	37774			76.9361	81.7847	73.0181	76.8826	88.0944		79.3432	2.59229
1517.83		16527	16869	18600	18700	24180			96.5701	97.0766	100.032	96.4464	98.533		97.7317	0.684299			1517.83		22663	25015	25882	27721	37745			76.6756	81.615	73.0181	77.1442	88.0268		79.2959	2.57403
1522.84		16555	16959	18602	18640	24009			96.7337	97.5945	100.043	96.137	97.8362		97.6689	0.666757			1522.84		22724	24933	25784	27710	37707			76.882	81.3475	72.7416	77.1136	87.9381		79.2046	2.57297
1527.84		16461	16992	18634	18656	24057			96.1844	97.7844	100.215	96.2195	98.0318		97.687	0.739289			1527.84		22693	24976	25883	27726	37590			76.7771	81.4878	73.0209	77.1581	87.6653		79.2218	2.50113
1532.85		16482	16909	18608	18605	24141			96.3071	97.3068	100.075	95.9565	98.3741		97.6039	0.747828			1532.85		22647	24853	25811	27693	37601			76.6214	81.0865	72.8178	77.0663	87.6909		79.0566	2.52474
1537.86		16399	16940	18567	18667	23824			95.8221	97.4852	99.8548	96.2762	97.0823		97.3041	0.701453			1537.86		22631	24862	25800	27611	37693			76.5673	81.1158	72.7868	76.8381	87.9055		79.0427	2.57848
1542.86		16416	16959	18564	18644	23975			95.9215	97.5945	99.8387	96.1576	97.6976		97.442	0.699794			1542.86		22732	24889	25793	27681	37493			76.909	81.2039	72.767	77.0329	87.4391		79.0704	2.48135
1547.88		16416	16919	18703	18574	23920			95.9215	97.3643	100.586	95.7966	97.4735		97.4284	0.863466			1547.88		22645	24807	25709	27629	37548			76.6147	80.9364	72.5301	76.8882	87.5673		78.9073	2.54082
1552.88		16292	16916	18653	18638	23957			95.1969	97.3471	100.317	96.1267	97.6243		97.3224	0.866275			1552.88		22571	24895	25733	27588	37440			76.3643	81.2235	72.5978	76.7741	87.3155		78.855	2.51869
1557.89		16361	16868	18701	18612	24017			95.6001	97.0708	100.576	95.9926	97.8688		97.4216	0.884028			1557.89		22641	24889	25647	27614	37512			76.6011	81.2039	72.3551	76.8464	87.4834		78.898	2.56242
1562.9		16289	16908	18688	18654	24091			95.1794	97.301	100.505	96.2092	98.1703		97.4731	0.910213			1562.9		22630	24903	25790	27631	37400			76.5639	81.2496	72.7586	76.8937	87.2222		78.9376	2.46953
1567.9		16285	16880	18636	18714	23983			95.156	97.1399	100.226	96.5186	97.7302		97.3541	0.835589			1567.9		22487	24714	25664	27598	37423			76.0801	80.6329	72.4031	76.8019	87.2758		78.6388	2.52369
1572.91		16282	16896	18611	18641	23915			95.1385	97.232	100.091	96.1421	97.4531		97.2114	0.830469			1572.91		22436	24712	25657	27586	37330			75.9076	80.6264	72.3833	76.7685	87.0589		78.549	2.49897
1577.92		16207	17039	18498	18624	23860			94.7002	98.0549	99.4837	96.0545	97.229		97.1045	0.820438			1577.92		22505	24822	25655	27429	37333			76.141	80.9853	72.3777	76.3316	87.0659		78.5803	2.52259
1582.93		16198	16964	18562	18699	23731			94.6477	97.6233	99.8279	96.4413	96.7033		97.0487	0.845794			1582.93		22539	24700	25676	27438	37340			76.2561	80.5873	72.4369	76.3567	87.0823		78.5438	2.49391
1587.93		16229	16913	18739	18563	23819			94.8288	97.3298	100.78	95.7399	97.0619		97.148	1.01469			1587.93		22448	24718	25646	27516	37421			75.9482	80.646	72.3523	76.5737	87.2712		78.5583	2.54498
1592.94		16235	16907	18665	18562	23815			94.8638	97.2953	100.382	95.7347	97.0456		97.0643	0.939929			1592.94		22505	24739	25500	27579	37382			76.141	80.7145	71.9404	76.749	87.1802		78.545	2.56806
1597.95		16203	16881	18695	18594	23846			94.6769	97.1457	100.543	95.8997	97.172		97.0875	0.97914			1597.95		22478	24829	25583	27406	37537			76.0497	81.0082	72.1746	76.2676	87.5417		78.6083	2.63612
1602.96		16274	16875	18595	18558	23741			95.0917	97.1111	100.005	95.7141	96.7441		96.9333	0.84803			1602.96		22530	24703	25521	27395	37292			76.2256	80.5971	71.9997	76.237	86.9703		78.4059	2.53622
1607.97		16231	16878	18625	18506	23758			94.8405	97.1284	100.167	95.4459	96.8134		96.879	0.924254			1607.97		22541	24741	25504	27418	37181			76.2628	80.721	71.9517	76.301	86.7114		78.3896	2.50021
1612.97		16134	16965	18572	18667	23798			94.2737	97.6291	99.8817	96.2762	96.9764		97.0074	0.912597			1612.97		22562	24680	25402	27509	37246			76.3339	80.522	71.6639	76.5542	86.863		78.3874	2.54141
1617.98		16180	16939	18683	18588	23739			94.5425	97.4794	100.479	95.8688	96.7359		97.021	0.992901			1617.98		22506	24740	25553	27482	37288			76.1444	80.7178	72.0899	76.4791	86.961		78.4784	2.52216
1622.98		16209	16853	18615	18636	23797			94.7119	96.9845	100.113	96.1163	96.9723		96.9796	0.886148			1622.98		22412	24655	25391	27349	37029			75.8264	80.4405	71.6329	76.109	86.357		78.0731	2.49608
1627.99		16162	16903	18647	18611	23756			94.4373	97.2723	100.285	95.9874	96.8052		96.9574	0.961431			1627.99		22534	24669	25435	27335	37241			76.2391	80.4861	71.757	76.07	86.8514		78.2807	2.54886
1632.99		16194	16903	18641	18575	23803			94.6243	97.2723	100.253	95.8017	96.9967		96.9896	0.941652			1632.99		22522	24681	25469	27368	37311			76.1985	80.5253	71.853	76.1619	87.0146		78.3507	2.56355
1638		16258	16913	18727	18576	23805			94.9982	97.3298	100.715	95.8069	97.0049		97.171	0.979706			1638		22558	24660	25470	27253	37176			76.3203	80.4568	71.8558	75.8418	86.6998		78.2349	2.51671
1643		16084	16795	18638	18534	23869			93.9815	96.6508	100.237	95.5903	97.2657		96.745	1.03541			1643		22458	24687	25270	27360	37266			75.982	80.5449	71.2915	76.1396	86.9097		78.1735	2.62912
1648.01		16142	16941	18599	18617	23836			94.3204	97.4909	100.027	96.0184	97.1312		96.9976	0.937123			1648.01		22529	24614	25353	27326	37207			76.2222	80.3067	71.5257	76.045	86.7721		78.1743	2.55947
1653.02		16168	16879	18393	18621	23795			94.4724	97.1341	98.919	96.039	96.9641		96.7057	0.727372			1653.02		22396	24617	25315	27454	37215			75.7722	80.3165	71.4185	76.4012	86.7907		78.1398	2.58245
1658.02		16058	16910	18638	18654	23760			93.8296	97.3125	100.237	96.2092	96.8215		96.8819	1.02986			1658.02		22433	24665	25314	27279	37340			75.8974	80.4731	71.4157	75.9142	87.0823		78.1565	2.65147
1663.03		16060	16900	18608	18649	23681			93.8413	97.255	100.075	96.1834	96.4996		96.7709	1.00386			1663.03		22622	24654	25235	27369	37147			76.5369	80.4372	71.1928	76.1646	86.6321		78.1927	2.57017
1668.04		16088	16954	18639	18521	23666			94.0049	97.5657	100.242	95.5232	96.4385		96.7549	1.04874			1668.04		22413	24560	25246	27244	37174			75.8298	80.1305	71.2238	75.8168	86.6951		77.9392	2.60306
1673.04		16143	16734	18548	18512	23714			94.3263	96.2997	99.7526	95.4768	96.6341		96.4979	0.905801			1673.04		22453	24557	25284	27216	37143			75.9651	80.1207	71.331	75.7388	86.6228		77.9557	2.57458
1678.04		16109	16954	18635	18646	23759			94.1276	97.5657	100.221	96.1679	96.8174		96.9798	0.991614			1678.04		22413	24554	25362	27171	37111			75.8298	80.1109	71.5511	75.6136	86.5482		77.9307	2.54457
1683.05		16105	16858	18530	18667	23749			94.1042	97.0133	99.6558	96.2762	96.7767		96.7653	0.887047			1683.05		22478	24461	25306	27261	37076			76.0497	79.8075	71.3931	75.8641	86.4666		77.9162	2.51924
1688.06		16044	16820	18479	18678	23779			93.7478	96.7946	99.3815	96.333	96.8989		96.6312	0.896257			1688.06		22314	24543	25179	27255	37118			75.4948	80.075	71.0348	75.8474	86.5645		77.8033	2.61617
1693.06		16079	16852	18573	18617	23841			93.9523	96.9788	99.8871	96.0184	97.1516		96.7976	0.959316			1693.06		22406	24479	25220	27262	37075			75.8061	79.8662	71.1505	75.8669	86.4642		77.8308	2.56186
1698.07		16131	16886	18544	18623	23735			94.2562	97.1744	99.7311	96.0493	96.7196		96.7861	0.888023			1698.07		22319	24512	25148	27221	37232			75.5117	79.9739	70.9474	75.7528	86.8304		77.8032	2.67076
1703.08		16064	16813	18523	18605	23749			93.8647	96.7543	99.6182	95.9565	96.7767		96.5941	0.923588			1703.08		22311	24601	25198	27364	37132			75.4847	80.2643	71.0884	76.1507	86.5972		77.917	2.61267
1708.08		16080	16793	18471	18635	23754			93.9582	96.6392	99.3385	96.1112	96.7971		96.5688	0.85887			1708.08		22376	24500	25250	27131	36980			75.7046	79.9347	71.2351	75.5023	86.2427		77.7239	2.5355
1713.09		16106	16887	18489	18640	23716			94.1101	97.1802	99.4353	96.137	96.6422		96.701	0.858499			1713.09		22457	24408	25217	27156	37234			75.9786	79.6346	71.142	75.5719	86.835		77.8324	2.62301
1718.1		16129	16863	18529	18633	23781			94.2445	97.0421	99.6504	96.1009	96.9071		96.789	0.872176			1718.1		22367	24296	25196	27131	37239			75.6741	79.2692	71.0828	75.5023	86.8467		77.675	2.6348
1723.11		16164	16803	18426	18547	23896			94.449	96.6968	99.0965	95.6573	97.3757		96.6551	0.785615			1723.11		22294	24530	25143	27153	37309			75.4271	80.0326	70.9333	75.5635	87.01		77.7933	2.71654
1728.11		16081	16813	18467	18700	23756			93.964	96.7543	99.317	96.4464	96.8052		96.6574	0.84863			1728.11		22319	24368	25154	27153	37162			75.5117	79.5041	70.9643	75.5635	86.6671		77.6421	2.63031
1733.12		16058	16910	18539	18652	23775			93.8296	97.3125	99.7042	96.1989	96.8826		96.7856	0.945714			1733.12		22273	24542	25185	27132	37301			75.3561	80.0718	71.0517	75.5051	86.9913		77.7952	2.70573
1738.13		16105	16888	18465	18599	23747			94.1042	97.1859	99.3062	95.9255	96.7685		96.6581	0.847416			1738.13		22369	24436	25140	27074	37205			75.6809	79.7259	70.9248	75.3437	86.7674		77.6885	2.66322
1743.13		16108	16745	18574	18652	23762			94.1218	96.363	99.8924	96.1989	96.8297		96.6812	0.927865			1743.13		22300	24352	25069	27052	37244			75.4474	79.4519	70.7245	75.2825	86.8584		77.5529	2.70567
1748.14		16116	16796	18400	18622	23711			94.1685	96.6565	98.9566	96.0442	96.6218		96.4895	0.765425			1748.14		22216	24447	25136	27144	37331			75.1632	79.7618	70.9135	75.5385	87.0613		77.6877	2.7299
1753.15		16106	16825	18433	18652	23802			94.1101	96.8234	99.1341	96.1989	96.9927		96.6518	0.805389			1753.15		22298	24314	25049	27092	37153			75.4407	79.3279	70.6681	75.3938	86.6461		77.4953	2.66782
1758.15		16076	16870	18432	18546	23917			93.9348	97.0824	99.1287	95.6522	97.4613		96.6519	0.87628			1758.15		22260	24249	25039	27019	37329			75.3121	79.1158	70.6398	75.1906	87.0566		77.463	2.74877
1763.16		16148	16850	18478	18720	23727			94.3555	96.9673	99.3761	96.5496	96.687		96.7871	0.79733			1763.16		22249	24324	24973	27077	37248			75.2749	79.3605	70.4536	75.352	86.8677		77.4618	2.74248
1768.17		16115	16944	18484	18698				94.1627	97.5082	99.4084	96.4361			96.8789	1.09424			1768.17		22156	24330	25008	27011	37119			74.9603	79.3801	70.5524	75.1684	86.5669		77.3256	2.69951
1773.17		16075	16839	18544	18591				93.929	96.9039	99.7311	95.8843			96.6121	1.20908			1773.17		22340	24437	24926	26996	37271			75.5828	79.7292	70.321	75.1266	86.9213		77.5362	2.78002
1778.18		16084	16819	18495	18601				93.9815	96.7889	99.4676	95.9358			96.5435	1.1381			1778.18		22314	24302	25003	27019	37303			75.4948	79.2887	70.5383	75.1906	86.996		77.5017	2.74948
1783.18		16023	16763	18399	18564				93.6251	96.4666	98.9513	95.745			96.197	1.09839			1783.18		22143	24378	24937	27058	37289			74.9163	79.5367	70.3521	75.2992	86.9633		77.4135	2.79533
1788.19		16092	16722	18382	18515				94.0283	96.2306	98.8598	95.4923			96.1528	1.01177			1788.19		22202	24285	24901	27009	37277			75.1159	79.2333	70.2505	75.1628	86.9353		77.3396	2.78929
1793.2		16043	16829	18473	18520				93.742	96.8464	99.3492	95.5181			96.3639	1.18093			1793.2		22174	24374	24869	26980	37382			75.0212	79.5237	70.1602	75.0821	87.1802		77.3935	2.86014
1798.2		16102	16817	18454	18595				94.0867	96.7773	99.2471	95.9049			96.504	1.07243			1798.2		22147	24234	24748	26890	37212			74.9298	79.0669	69.8189	74.8316	86.7837		77.0862	2.83295

## Sheet: Figure 5g
Figure 5g		Lucigenin	Normalised Data:		R404V
Times (s)		0mM						Mean	SEM		2.5mM						Mean	SEM		5mM						Mean	SEM		10mM						Mean	SEM		20mM						Mean	SEM		40mM
0		89.0646	96.0396	80.117	83.2723	103.341		90.3669	4.22851		92.9799	93.1973	92.5144	90.2851	115.484		96.8921	4.67669		95.4955	95.4955	92.9254	90.0958	96.9412		94.1907	1.21117		93.1487	95.8042	94.3739	85.343	98.052		93.3444	2.16023		105.349	95.8042	92.4956	94.8928	101.527		98.0137	2.3582		103.297	95.6633	95.183
1.99161		90.1186	96.0396	86.1598	82.906	101.432		91.3312	3.3421		92.1203	94.3311	93.858	92.925	115.269		97.7006	4.40855		94.1441	94.1441	92.7342	88.2854	95.2941		92.9204	1.22775		89.6501	96.0373	92.922	84.6154	97.6191		92.1688	2.33062		104.309	95.338	96.3351	95.4035	102.036		98.6842	1.8755		101.57	96.6837	94.7977
3.98723		89.3281	96.2871	86.7446	82.906	101.432		91.3396	3.33632		94.4126	93.8775	92.7063	93.981	117.204		98.4364	4.70049		93.5435	93.5435	88.3365	90.6283	93.6471		91.9398	1.06682		90.2332	98.3683	94.5554	83.368	96.3204		92.569	2.66237		100.891	93.7063	93.1937	90.807	101.527		96.025	2.17454		100.471	93.3674	95.9538
5.97789		86.9565	94.802	88.499	84.6154	104.296		91.8338	3.5435		94.9857	90.2494	92.7063	91.9747	111.183		96.2198	3.81723		93.8438	93.8438	94.6463	94.4622	94.8235		94.3239	0.204156		90.5248	96.2704	97.0962	83.6798	94.3723		92.3887	2.4544		102.229	95.338	95.986	93.0541	99.7455		97.2705	1.64123		102.669	97.1939	97.6879
7.97268		89.4598	96.7822	86.7446	83.8828	100.477		91.4693	3.10875		94.5559	94.5578	90.0192	92.0803	117.204		97.6835	4.95354		89.7898	89.7898	93.1166	91.9063	95.2941		91.9793	1.04582		89.3586	95.338	95.6443	83.264	100.866		92.8941	3.01929		102.675	93.7063	91.9721	90.1941	103.308		96.371	2.76099		99.529	92.602	93.8343
9.96509		90.1186	94.5545	84.0156	82.906	99.5227		90.2235	3.14107		92.6934	90.4762	92.3225	92.8194	117.204		97.1032	5.04294		93.0931	93.0931	91.9694	87.0075	97.1765		92.4679	1.62815		92.5656	96.9697	93.4664	83.4719	101.732		93.641	3.00944		105.944	95.1049	92.6702	92.237	99.4911		97.0893	2.56103		97.6452	94.6429	96.3391
11.966		93.0171	94.3069	83.0409	83.7607	102.387		91.3025	3.60525		91.5473	92.0635	95.2015	92.6082	119.57		98.1981	5.37981		92.9429	92.9429	91.587	93.6102	94.8235		93.1813	0.526133		92.1283	96.5035	93.6479	85.0312	98.9177		93.2457	2.36299		104.16	96.2704	93.5428	92.6456	104.326		98.189	2.5428		99.0581	92.3469	94.7977
13.9566		89.3281	94.5545	83.0409	81.3187	102.625		90.1735	3.90023		91.8338	92.9705	92.8983	90.4963	116.344		96.9086	4.87955		94.5946	94.5946	95.9847	89.6699	96.2353		94.2158	1.18659		91.691	93.007	96.9147	84.1996	96.1039		92.3832	2.26073		103.566	93.007	95.288	92.5434	100.509		96.9827	2.1698		101.256	98.7245	97.4952
15.9573		93.2806	100.99	87.9142	87.1795	98.0907		93.491	2.72372		98.7106	92.517	91.1708	90.3907	114.194		97.3965	4.447		90.0901	90.0901	91.3958	90.0958	91.7647		90.6873	0.369182		92.1283	94.1725	95.8258	87.0062	97.1861		93.2638	1.77793		104.755	95.5711	95.8115	87.8447	102.29		97.2545	2.95864		98.9011	93.6225	94.4123
17.9498		89.5916	92.5743	86.5497	83.8828	100.716		90.6629	2.90477		91.9771	92.7438	93.858	93.8754	118.064		98.1037	5.00301		93.6937	93.6937	93.499	90.3088	97.1765		93.6743	1.08681		95.3353	97.2028	95.6443	83.9917	97.4026		93.9153	2.51449		100.743	95.1049	94.7644	90.2962	100.763		96.3344	1.99358		100	91.8367	96.3391
19.9479		91.0408	95.5446	83.4308	82.7839	103.341		91.2283	3.85681		95.8453	94.1043	90.787	88.3844	114.409		96.7059	4.61073		95.3453	95.3453	91.3958	90.0958	92		92.8365	1.06947		92.4198	95.8042	94.3739	82.9522	95.671		92.2442	2.4013		104.903	96.9697	91.0995	94.382	101.781		97.8272	2.48569		102.983	93.8775	92.2929
21.9372		92.6219	97.2772	84.4055	82.906	102.625		91.9672	3.7517		93.6963	94.5578	89.4434	88.2788	109.892		95.1738	3.87028		92.1922	92.1922	89.4838	89.9894	93.4118		91.4538	0.739924		94.898	98.3683	93.8294	84.9272	98.9177		94.1881	2.51237		103.12	96.0373	94.9389	90.9091	102.29		97.4592	2.30938		100.785	94.3878	96.7245
23.9334		91.4361	96.7822	86.1598	82.0513	101.909		91.6677	3.5631		95.702	95.2381	93.4741	93.6642	110.323		97.6802	3.19004		92.9429	92.9429	93.1166	92.3323	94.3529		93.1375	0.331801		92.2741	92.0746	94.5554	86.1746	96.7532		92.3664	1.76731		100.149	98.8345	93.3682	90.6027	101.272		96.8453	2.06794		101.256	98.7245	94.7977
25.9238		89.5916	97.5247	84.7953	83.6386	104.296		91.9692	3.93274		90.831	97.5057	90.595	91.8691	118.71		97.9021	5.35213		93.5435	93.5435	89.4838	87.9659	94.5882		91.825	1.30223		92.7114	96.9697	91.6515	82.6403	101.299		93.0543	3.11317		107.875	93.2401	101.047	92.0327	103.817		99.6024	3.05014		100.314	93.1122	97.3025
27.9208		93.4124	91.8317	85.3801	84.8596	100.955		91.2877	2.95365		93.2665	95.0113	94.0499	91.7635	116.559		98.1301	4.63784		94.7447	94.7447	90.0574	94.3557	99.0588		94.5923	1.4251		94.1691	99.3007	99.0926	81.8087	100.433		94.9608	3.46016		105.498	93.7063	96.3351	89.6834	104.835		98.0114	3.10888		105.18	97.449	96.5318
29.9136		94.8617	97.7723	86.5497	84.127	103.58		93.3781	3.59026		93.2665	91.1565	90.4031	91.5523	109.247		95.1251	3.56163		92.4925	92.4925	92.7342	88.2854	94.8235		92.1656	1.06437		93.4402	96.0373	93.1034	84.0956	96.5368		92.6427	2.24263		101.486	94.8718	96.8586	89.7855	98.9822		96.3968	1.98534		100.785	93.3674	97.8805
31.9077		90.5138	91.0891	83.4308	82.5397	101.193		89.7533	3.35594		91.5473	96.3719	92.1305	94.7202	114.194		97.7927	4.19232		95.1952	95.1952	90.631	85.836	93.8824		92.1479	1.78496		89.3586	97.4359	91.2886	84.6154	98.9177		92.3232	2.63531		100.594	91.6084	92.6702	91.8284	103.053		95.951	2.4354		103.925	92.8571	95.3757
33.8992		95.9157	94.3069	84.7953	84.2491	100.716		91.9966	3.22961		93.1232	93.1973	90.0192	90.8131	118.495		97.1295	5.37789		95.6457	95.6457	90.8222	87.5399	94.3529		92.8013	1.58409		92.2741	96.9697	97.8221	84.5114	97.1861		93.7527	2.51282		101.337	96.0373	96.3351	91.4198	101.527		97.3312	1.88762		100.942	96.6837	99.0366
35.8949		91.1726	96.7822	85.1852	85.7143	102.148		92.2005	3.25796		96.8481	91.61	87.1401	89.9683	119.14		96.9413	5.77014		95.6457	95.6457	92.9254	93.8232	97.6471		95.1374	0.819601		94.1691	92.7739	91.6515	83.9917	97.1861		91.9545	2.19595		102.823	94.4056	93.3682	88.4576	98.4733		95.5056	2.427		104.396	88.7755	98.4586
37.8858		91.1726	96.0396	85.3801	83.5165	100		91.2218	3.11262		92.2636	91.1565	89.8273	91.8691	114.839		95.991	4.73014		90.8408	90.8408	96.9407	89.8829	95.0588		92.7128	1.38557		91.5452	94.8718	93.2849	85.8628	96.7532		92.4636	1.86131		107.132	92.0746	94.9389	90.5005	104.071		97.7435	3.32153		99.843	94.6429	98.6513
68.0895		100	100	100	100	100		100	0		100	100	100	100	100		100	0		100	100	100	100	100		100	0		100	100	100	100	100		100	0		100	100	100	100	100		100	0		100	100	100
70.0776		102.503	102.97	102.534	97.8022	101.193		101.401	0.947528		100.287	100.454	102.687	101.584	98.4946		100.701	0.700902		100.901	100.901	95.2199	104.579	99.0588		100.132	1.52055		100	103.496	100	100.936	101.299		101.146	0.641056		102.526	96.9697	97.9058	101.737	98.2188		99.4714	1.1122		100.157	97.449	98.2659
72.0716		102.108	98.5148	102.339	104.518	105.728		102.642	1.23392		101.576	103.855	98.8484	100.739	93.3333		99.6703	1.77648		100.3	100.3	102.486	102.343	96.2353		100.333	1.12843		97.8134	102.331	98.7296	97.7131	101.299		99.5772	0.944756		103.863	101.865	99.4764	102.349	100.254		101.562	0.776744		102.041	98.7245	99.422
74.0634		99.473	102.475	103.314	98.779	104.773		101.763	1.14286		99.2837	98.6395	101.344	100.106	96.9892		99.2723	0.727929		100	100	96.5583	98.935	98.5882		98.8163	0.631145		96.793	101.865	100.726	99.3763	100.216		99.7953	0.851933		102.675	94.1725	99.1274	99.8979	102.29		99.6325	1.52405		104.396	99.4898	101.927
76.0598		98.419	102.475	107.017	104.029	105.489		103.486	1.47439		100.573	100.227	101.152	103.59	95.2688		100.162	1.35737		100	100	96.3671	102.023	97.4118		99.1605	1.0116		99.4169	101.632	103.63	98.7526	97.6191		100.21	1.07662		99.7028	100.466	100	98.9785	102.799		100.389	0.649061		99.686	96.9388	96.5318
78.0481		102.108	100.495	103.899	99.5116	100.477		101.298	0.772295		97.2779	102.948	100.768	101.162	92.4731		98.9257	1.85635		99.8499	99.8499	98.8528	104.153	100		100.541	0.925948		97.9592	97.2028	99.4555	98.2328	98.4848		98.267	0.366642		100.594	95.8042	98.0803	97.5485	101.018		98.609	0.975069		100	101.531	98.0732
80.0421		101.449	98.5148	109.162	99.7558	101.193		102.015	1.86316		98.5673	100.907	97.1209	100.106	94.8387		98.3079	1.08394		101.051	101.051	97.8967	102.13	100.235		100.473	0.71089		95.6268	99.3007	99.2741	97.1933	98.2684		97.9327	0.694516		104.16	94.6387	102.269	98.9785	100.254		100.06	1.61695		100.471	100.765	96.1464
82.0316		102.635	101.238	103.509	99.7558	103.103		102.048	0.689261		99.1404	100.227	97.5048	101.584	95.914		98.874	0.997021		103.003	103.003	98.4704	103.727	100		101.641	1.02002		97.3761	102.564	97.6406	98.1289	98.9177		98.9255	0.946719		102.823	97.4359	97.2077	102.349	98.2188		99.607	1.23007		99.2151	96.6837	102.505
84.0267		100.263	104.208	101.17	102.686	103.58		102.381	0.735514		98.7106	100.454	99.2322	101.584	95.6989		99.1358	0.993272		100.601	100.601	99.6176	101.385	96.7059		99.7818	0.818467		97.5219	100	98.5481	96.5696	96.3204		97.792	0.677488		109.213	96.0373	100.174	100.613	99.2366		101.055	2.19088		97.3312	99.7449	100.385
86.0179		103.03	100.248	109.357	102.32	99.5227		102.895	1.73903		96.5616	105.215	99.8081	98.8384	97.4193		99.5686	1.51885		99.5495	99.5495	97.8967	102.556	96.2353		99.1574	1.04846		98.5423	103.263	99.8185	100.104	101.515		100.649	0.806549		101.932	97.669	99.3019	101.328	98.7277		99.7916	0.800526		101.099	104.592	100
88.0107		101.581	102.723	104.288	96.4591	100.239		101.058	1.32858		94.9857	103.175	103.071	101.689	95.0538		99.5949	1.88616		102.252	102.252	98.2792	101.917	97.6471		100.47	1.02994		99.5627	97.9021	97.6406	96.0499	102.381		98.7073	1.07414		99.8514	96.5035	98.7784	99.1828	99.7455		98.8123	0.609086		99.529	94.6429	99.8073
90.0036		99.0777	100.248	102.339	99.2674	105.489		101.284	1.20014		96.7049	99.093	98.0806	96.1985	93.7634		96.7681	0.907857		97.1471	97.1471	100.191	100.639	98.3529		98.6955	0.739136		97.0845	100.233	98.7296	95.5302	101.732		98.6618	1.09982		100.891	96.2704	99.8255	102.451	98.4733		99.5824	1.05366		100.157	97.9592	100.193
91.9985		100.263	96.0396	102.339	101.465	103.103		100.642	1.24375		95.4155	102.494	100.576	98.944	94.4086		98.3676	1.52687		96.8469	96.8469	100	99.0415	98.1176		98.1706	0.616954		97.6676	101.165	100.726	95.9459	100.216		99.1443	1.00366		101.189	98.3683	99.1274	99.5914	97.9644		99.248	0.562154		102.198	96.1735	95.3757
93.9902		96.7062	96.2871	103.509	99.0232	104.535		100.012	1.70971		95.702	100.907	102.303	101.689	90.5376		98.2279	2.25044		101.952	101.952	98.6616	103.408	100.706		101.336	0.793766		102.332	99.7669	102.722	98.2328	98.9177		100.394	0.906132		101.783	93.4732	101.745	96.8335	102.036		99.1741	1.72604		101.256	98.2143	94.9904
95.9848		97.1014	97.2772	102.144	102.686	105.489		100.94	1.63318		95.8453	100.227	99.8081	98.8384	95.4839		98.0405	0.997404		100.3	100.3	98.6616	101.385	97.4118		99.6117	0.7012		96.9388	96.9697	98.7296	98.5447	101.082		98.453	0.757996		101.189	100	98.2548	102.86	95.9287		99.6465	1.1956		100.314	98.4694	95.7611
97.9736		100.263	100.99	103.314	102.076	103.341		101.997	0.615068		98.5673	103.855	101.919	98.8384	93.7634		99.3887	1.71715		98.9489	98.9489	98.6616	99.574	95.2941		98.2855	0.762574		95.9184	100.233	98.9111	100.832	99.3507		99.049	0.851194		104.309	96.9697	100.698	97.4464	98.7277		99.6302	1.33593		99.529	96.9388	96.3391
99.9655		100.263	100.99	102.729	103.419	99.5227		101.385	0.735685		95.4155	101.134	101.919	96.9377	94.4086		97.963	1.51463		99.0991	99.0991	102.294	100.959	96.9412		99.6785	0.91231		95.3353	103.496	97.4592	95.5302	97.6191		97.888	1.47965		100.743	100	101.92	94.7906	99.2366		99.338	1.21996		99.0581	97.449	98.2659
101.955		95.3887	101.238	112.476	99.8779	102.148		102.226	2.81336		96.5616	103.628	98.6564	100.211	96.3441		99.0803	1.34111		98.3483	98.3483	101.721	100.532	96.4706		99.0841	0.920954		100.875	100.233	94.1924	96.0499	99.3507		98.1401	1.2899		102.526	96.9697	99.4764	101.022	97.9644		99.5916	1.00476		102.512	93.8775	96.1464
103.948		100.395	98.5148	108.382	97.4359	102.625		101.471	1.94002		97.9943	100.907	100.576	103.485	94.4086		99.4741	1.53625		97.2973	97.2973	99.2352	97.2311	97.4118		97.6945	0.386258		99.1254	101.632	98.0036	98.1289	101.299		99.6377	0.772791		101.486	96.9697	99.8255	95.9142	97.201		98.2793	1.02821		101.57	99.7449	95.7611
105.935		98.5507	96.0396	105.458	95.7265	102.387		99.6323	1.88227		92.5501	103.855	102.687	99.6832	96.129		98.9809	2.09133		100.451	100.451	98.8528	103.408	102.588		101.15	0.819219		97.9592	103.73	99.4555	98.2328	96.7532		99.2261	1.20501		101.635	96.5035	100.873	98.6721	97.4555		99.0276	0.979005		100.157	99.7449	97.4952
107.932		98.0237	101.98	111.891	100	100.955		102.57	2.41979		94.8424	99.5465	100.96	99.2608	93.7634		97.6746	1.41652		98.9489	98.9489	97.8967	99.6805	96.7059		98.4362	0.517646		99.5627	97.9021	99.2741	97.0894	99.3507		98.6358	0.485137		100.446	96.7366	100.873	98.6721	93.3842		98.0223	1.37085		97.4882	96.9388	97.6879
109.921		98.2872	100	105.653	100.855	102.625		101.484	1.25501		96.1318	101.814	101.152	102.323	91.3979		98.5637	2.10546		99.5495	99.5495	98.4704	98.5091	99.2941		99.0745	0.243341		96.5015	100.932	97.8221	95.7381	98.2684		97.8525	0.893193		98.0683	95.5711	100.873	99.7957	94.1476		97.6911	1.25985		99.0581	95.4082	97.8805
111.922		97.3649	102.475	102.534	97.6801	101.432		100.297	1.15071		93.4097	103.175	104.223	99.7888	96.9892		99.517	1.99101		99.6997	99.6997	96.5583	101.065	101.647		99.734	0.880875		97.5219	99.7669	99.8185	98.8565	95.8875		98.3703	0.747282		104.309	94.8718	100	100.511	97.4555		99.4294	1.58074		97.9592	99.7449	96.7245
113.912		100.395	97.7723	104.483	102.198	101.432		101.256	1.10025		94.1261	101.361	99.6161	98.3105	95.914		97.8654	1.28976		98.4985	98.4985	95.9847	100.852	96.2353		98.0138	0.888977		95.7726	96.0373	98.5481	98.025	100.649		97.8065	0.892934		102.823	98.6014	97.7312	96.3228	97.7099		98.6377	1.10817		96.0754	92.602	96.1464
115.906		100.527	96.5346	111.111	100.366	103.103		102.328	2.43308		95.5587	101.814	99.2322	99.2608	94.4086		98.0549	1.35089		95.3453	95.3453	100.382	101.597	101.647		98.8635	1.45404		93.2945	102.797	95.6443	98.1289	98.2684		97.6266	1.58266		100.891	95.1049	99.1274	95.097	100		98.0442	1.23351		97.4882	95.4082	97.1098
117.898		101.186	97.7723	100	102.808	105.489		101.451	1.30113		94.4126	103.628	101.919	103.59	94.4086		99.5918	2.1376		99.0991	99.0991	99.2352	100.746	95.7647		98.7887	0.817485		94.0233	100.699	95.4628	95.842	100.433		97.2921	1.37127		98.3655	96.2704	99.651	95.6078	98.7277		97.7245	0.765626		100.471	98.4694	98.2659
119.897		97.892	101.98	109.162	99.7558	103.341		102.426	1.92477		92.8367	101.134	102.495	101.584	93.5484		98.3196	2.10758		99.0991	99.0991	97.8967	100.532	98.8235		99.0902	0.422837		93.8775	99.5338	96.3702	97.0894	97.1861		96.8114	0.906402		102.526	97.9021	99.8255	96.6292	97.4555		98.8677	1.05447		98.2732	98.7245	97.6879
121.89		98.946	98.7624	108.577	98.5348	101.193		101.203	1.90455		98.1375	101.814	100.384	100.422	96.9892		99.5494	0.869917		97.5976	97.5976	98.088	99.6805	97.4118		98.0751	0.416746		95.1895	101.399	97.2777	95.5302	100.866		98.0523	1.30902		100.149	98.3683	97.3822	100.409	100.509		99.3633	0.629942		98.7441	94.3878	101.349
123.885		99.2095	99.2574	109.942	99.7558	105.489		102.731	2.15544		91.8338	100	101.152	101.056	95.0538		97.819	1.86829		100.901	100.901	102.486	100.959	96.4706		100.343	1.0146		92.8571	97.9021	97.8221	95.3222	99.1342		96.6076	1.12367		104.012	95.338	100.349	98.2635	102.544		100.101	1.53931		97.3312	94.3878	94.7977
125.876		97.6285	97.2772	109.747	103.175	102.864		102.138	2.27437		93.1232	101.587	101.344	103.59	92.2581		98.3805	2.35933		98.1982	98.1982	95.7935	98.935	97.1765		97.6603	0.544181		97.0845	98.6014	95.8258	97.5052	97.4026		97.2839	0.445239		101.04	96.0373	98.6038	96.1185	100.509		98.4617	1.05422		100.628	91.5816	98.2659
127.872		97.6285	98.2673	110.916	97.0696	100.477		100.872	2.57687		95.702	99.093	99.8081	102.006	91.1828		97.5584	1.88804		97.1471	97.1471	101.147	101.81	96.4706		98.7445	1.12797		97.9592	101.165	96.9147	97.6091	102.814		99.2925	1.14398		96.5825	93.4732	95.4625	97.6507	100.763		96.7864	1.2111		96.2323	93.6225	94.027
129.864		100.395	98.2673	108.382	101.587	104.057		102.538	1.73487		97.2779	103.855	105.758	98.5216	94.1936		99.9212	2.13654		98.1982	98.1982	98.088	100.746	96.2353		98.293	0.717947		94.3149	97.9021	96.7332	96.2578	102.597		97.5611	1.38569		101.189	95.5711	99.3019	97.1399	99.2366		98.4877	0.970626		96.5463	92.8571	97.3025
131.859		98.0237	100.248	109.162	99.7558	104.773		102.392	2.02646		94.4126	100.907	96.1612	94.0866	92.6882		95.6511	1.42557		101.201	101.201	99.8088	99.8935	94.3529		99.2915	1.27109		94.6064	94.8718	97.2777	97.6091	100		96.873	0.990608		99.5542	96.7366	96.5096	98.6721	96.9466		97.6838	0.603934		96.0754	94.898	98.2659
133.849		98.2872	99.7525	113.255	100.488	105.728		103.502	2.74243		92.9799	103.401	102.879	97.5713	100.215		99.4094	1.91495		97.1471	97.1471	93.8815	100.213	96.2353		96.9248	1.01608		94.6064	101.399	96.9147	97.5052	101.082		98.3014	1.29491		101.783	97.9021	100.349	96.0163	95.4198		98.2941	1.22472		96.5463	94.898	95.183
135.845		98.6825	94.802	110.721	100.366	99.7613		100.867	2.64703		89.8281	98.1859	98.6564	99.2608	95.2688		96.24	1.74366		98.3483	98.3483	98.088	102.13	96.2353		98.63	0.960115		95.7726	100.932	95.0998	99.5842	97.8355		97.8449	1.10426		98.5141	97.2028	102.967	101.022	98.2188		99.5848	1.05328		95.1334	96.6837	94.4123
137.834		99.8683	98.7624	107.407	103.175	100.955		102.033	1.52861		94.1261	103.855	99.2322	95.6705	92.9032		97.1574	1.98317		95.6457	95.6457	104.78	97.2311	101.177		98.8958	1.785		93.586	100	96.0073	96.0499	97.4026		96.6092	1.04742		98.9599	97.4359	96.5096	97.0378	96.6921		97.3271	0.43778		97.4882	94.898	95.183
139.829		100.395	99.0099	108.772	99.6337	104.773		102.517	1.86185		93.6963	104.082	99.4242	96.1985	97.4193		98.164	1.7462		97.1471	97.1471	98.4704	102.13	99.0588		98.7907	0.914529		95.3353	98.8345	96.0073	94.4906	98.7013		96.6738	0.888298		99.4056	95.1049	96.8586	96.0163	94.402		96.3575	0.867513		93.8775	96.6837	98.0732
141.821		97.7602	101.733	111.111	101.099	100.955		102.532	2.25335		94.6991	98.4127	99.6161	101.162	95.6989		97.9177	1.2028		96.3964	96.3964	100.574	100.32	97.6471		98.2666	0.919668		91.691	98.3683	95.4628	95.6341	100.216		96.2745	1.44916		98.5141	96.2704	98.2548	96.6292	97.9644		97.5266	0.45169		93.7206	94.1326	96.5318
143.817		97.892	99.2574	110.136	98.4127	101.671		101.474	2.26046		96.7049	101.814	97.5048	101.795	101.505		99.8649	1.13517		100	100	100.765	97.4441	97.8824		99.2182	0.653695		95.481	100	92.922	98.6487	102.381		97.8865	1.66855		100.594	93.9394	98.0803	97.7528	97.7099		97.6154	1.06375		94.0345	92.3469	97.8805
145.806		103.426	100	110.136	100.733	103.103		103.479	1.79043		95.5587	102.948	103.839	101.689	90.1075		98.8285	2.61729		100.751	100.751	101.53	98.935	97.1765		99.8285	0.788243		92.4198	100.699	94.3739	97.0894	101.082		97.1329	1.70505		98.2169	93.4732	97.5567	93.1563	96.4377		95.7682	1.04241		93.4066	97.449	99.0366
147.803		98.946	97.0297	114.035	98.4127	98.568		101.398	3.17578		96.2751	100.227	96.929	98.8384	92.043		96.8625	1.39284		97.5976	97.5976	96.1759	99.148	93.4118		96.7862	0.965771		96.2099	102.564	96.9147	96.4657	97.1861		97.8681	1.18623		98.5141	96.9697	95.8115	98.7743	99.2366		97.8612	0.63827		93.8775	92.3469	93.8343
149.795		98.419	98.0198	107.797	100.611	103.341		101.638	1.80759		95.5587	103.175	97.1209	96.5153	97.4193		97.9578	1.34242		100.3	100.3	97.5143	101.065	95.2941		98.8948	1.08469		90.5248	101.165	96.5517	100	99.3507		97.5185	1.90607		101.04	93.9394	99.1274	97.0378	97.201		97.6691	1.18361		92.7786	96.1735	94.9904
151.792		98.5507	99.2574	111.111	97.8022	99.5227		101.249	2.48363		94.2693	98.8662	96.929	100.845	93.9785		96.9776	1.32011		99.8499	99.8499	97.5143	101.491	96.4706		99.0351	0.901333		94.898	99.3007	95.6443	98.025	97.6191		97.0974	0.804242		98.8113	93.7063	98.2548	98.7743	97.7099		97.4513	0.957533		95.4474	93.6225	100.771
153.781		96.8379	97.5247	109.747	101.221	101.909		101.448	2.29974		98.2808	100.227	101.919	97.8881	91.3979		97.9426	1.78863		98.3483	98.3483	96.5583	98.8285	97.6471		97.9461	0.394821		91.3994	102.564	95.8258	96.0499	99.7836		97.1245	1.90102		97.9198	93.4732	96.1606	96.5271	97.201		96.2563	0.757885		93.8775	91.3265	96.5318
155.779		100.395	102.97	110.331	97.0696	100.955		102.344	2.21063		95.1289	98.8662	96.3532	100	93.9785		96.8654	1.12785		99.2493	99.2493	99.2352	99.787	95.0588		98.5159	0.870635		94.898	101.165	94.5554	97.7131	101.082		97.8828	1.43218		100.446	93.9394	97.9058	94.4842	99.7455		97.3041	1.33166		93.4066	92.8571	95.183
157.769		96.4427	101.733	109.552	102.32	103.341		102.678	2.09271		95.1289	103.175	95.7773	101.056	91.1828		97.2639	2.15713		98.0481	98.0481	97.7055	99.148	97.8824		98.1664	0.253445		97.5219	101.632	94.5554	96.0499	100.866		98.1249	1.36421		97.9198	94.1725	99.4764	94.7906	97.9644		96.8647	1.01719		94.6625	95.4082	92.4856
159.762		97.892	100.248	109.357	95.2381	103.341		101.215	2.43424		95.9885	100.907	100	100.317	98.2796		99.0984	0.891912		99.2493	99.2493	97.3231	95.8466	92.9412		96.9219	1.18314		93.0029	103.73	96.0073	96.5696	98.7013		97.6021	1.78208		99.1085	93.007	99.3019	94.382	98.9822		96.9563	1.35022		94.3485	90.8163	96.1464
161.75		98.2872	102.228	109.162	100.488	102.864		102.606	1.82105		95.8453	100.68	93.858	98.6272	94.6237		96.7269	1.27813		95.9459	95.9459	97.1319	101.278	94.3529		96.931	1.17311		91.9825	102.797	92.7405	99.4802	98.4848		97.0971	2.06441		96.2853	95.8042	95.4625	93.9734	96.9466		95.6944	0.497222		94.6625	94.6429	93.8343
163.744		99.3412	98.7624	109.747	99.8779	100.239		101.593	2.05353		96.9914	97.5057	97.3129	99.3664	102.15		98.6654	0.964727		99.2493	99.2493	100	99.787	99.2941		99.5159	0.157994		93.7318	98.8345	92.7405	103.222	98.2684		97.3595	1.89568		98.3655	97.2028	98.0803	94.382	96.9466		96.9954	0.704605		93.8775	94.898	92.4856
165.735		100.527	96.2871	110.526	96.7033	104.535		101.716	2.66063		94.1261	100.68	97.3129	97.4657	96.5591		97.2288	1.05003		96.8469	96.8469	99.2352	101.597	97.1765		98.3405	0.92803		96.9388	100.466	97.0962	94.4906	100		97.7984	1.09858		98.6627	95.1049	96.1606	93.1563	92.8753		95.192	1.06072		94.3485	95.1531	93.2563
167.732		98.5507	95.5446	111.696	100.611	102.387		101.758	2.73283		96.7049	100.227	98.4645	97.0433	96.129		97.7137	0.736808		99.2493	99.2493	98.4704	99.4675	93.4118		97.9696	1.15203		93.7318	98.8345	97.2777	95.6341	99.3507		96.9657	1.03704		103.269	92.7739	100	93.4627	93.1298		96.5271	2.15095		93.4066	93.1122	94.9904
169.72		99.0777	100.743	106.628	96.5812	104.535		101.513	1.81847		95.1289	101.361	97.3129	98.7328	96.7742		97.8619	1.04767		98.7988	98.7988	100.191	101.704	98.5882		99.6162	0.595067		94.7522	95.8042	96.0073	96.4657	96.5368		95.9132	0.321155		96.731	97.9021	98.9529	96.0163	98.2188		97.5642	0.527312		95.2904	90.051	93.0636
171.712		96.0474	100.248	108.967	99.1453	102.864		101.454	2.17311		98.1375	101.814	97.5048	96.7265	100.645		98.9656	0.968716		96.8469	96.8469	98.4704	101.597	95.5294		97.8582	1.04464		93.4402	98.6014	92.922	101.247	100		97.2422	1.71193		98.9599	93.7063	99.3019	97.2421	98.2188		97.4858	1.00878		92.3077	93.3674	99.8073
173.702		103.03	101.238	108.187	101.343	101.193		102.998	1.34206		98.2808	100.68	96.3532	95.2481	91.6129		96.4351	1.51818		98.1982	98.1982	97.5143	101.597	95.2941		98.1605	1.01116		93.8775	101.865	93.8294	95.7381	97.1861		96.4992	1.48057		96.5825	97.9021	100.174	95.3013	97.9644		97.585	0.811487		93.0926	94.898	93.4489
175.696		95.6522	99.2574	113.45	97.558	100.955		101.375	3.14479		93.2665	103.401	97.6967	93.453	99.3548		97.4345	1.90506		100.601	100.601	99.4264	99.0415	96.4706		99.2279	0.756489		91.5452	98.6014	93.6479	97.2973	100.433		96.3049	1.62809		98.3655	95.1049	100.698	95.5056	96.6921		97.2733	1.02681		96.3893	91.0714	94.605
177.685		98.8142	97.0297	110.916	97.558	100.955		101.055	2.55643		97.5645	103.855	96.5451	96.7265	92.9032		97.5188	1.77521		99.0991	99.0991	96.9407	98.5091	96.9412		98.1178	0.492387		95.1895	98.6014	95.4628	94.4906	99.1342		96.5757	0.952811		98.8113	94.4056	96.1606	93.0541	95.1654		95.5194	0.966722		91.3658	93.6225	95.7611
179.684		96.4427	98.2673	103.509	98.6569	98.3294		99.041	1.18248		94.2693	102.721	99.0403	99.3664	101.72		99.4235	1.46399		99.3994	99.3994	98.6616	100.852	96.9412		99.0507	0.635978		94.4606	97.669	93.6479	96.3618	94.3723		95.3023	0.742766		97.7712	98.6014	95.4625	96.6292	95.4198		96.7768	0.628827		92.6217	92.8571	99.8073
181.673		96.1792	99.0099	111.501	99.8779	100.477		101.409	2.62838		95.4155	102.494	98.8484	93.5586	104.516		98.9666	2.06292		97.5976	97.5976	97.8967	98.8285	95.7647		97.537	0.497285		93.4402	99.0676	95.6443	93.1393	99.5671		96.1717	1.35738		97.1768	97.9021	96.6841	94.1777	94.1476		96.0177	0.781712		94.9764	92.0918	95.3757
183.666		102.371	97.2772	101.949	95.3602	100.955		99.5826	1.38574		95.2722	103.855	97.8887	95.8817	98.0645		98.1924	1.51722		98.4985	98.4985	98.6616	99.574	96.4706		98.3406	0.508484		90.5248	101.865	94.5554	98.025	102.381		97.4702	2.24133		96.4339	96.5035	94.9389	90.7048	96.9466		95.1055	1.15114		93.8775	92.3469	95.3757
185.653		99.473	97.7723	103.119	96.8254	100		99.4379	1.0832		97.4212	99.7732	98.0806	95.7761	101.075		98.4253	0.921535		97.4475	97.4475	98.4704	101.171	96.4706		98.2015	0.807045		92.8571	96.9697	94.3739	96.9855	95.2381		95.2849	0.789196		98.2169	92.7739	95.4625	94.8928	96.6921		95.6076	0.909582		93.8775	90.3061	96.1464
187.646		97.4967	99.5049	105.848	100.488	101.671		101.002	1.39145		93.2665	102.494	99.8081	96.3041	99.1398		98.2025	1.57867		95.7958	95.7958	97.5143	100.426	100		97.9064	0.99485		92.5656	97.9021	92.3775	101.455	101.515		97.1631	2.02421		95.8395	94.8718	97.0332	94.0756	96.1832		95.6007	0.515052		91.0518	92.0918	93.0636
189.634		101.186	97.7723	97.8558	99.0232	99.284		99.0242	0.619379		95.5587	103.401	99.2322	92.2914	95.4839		97.1935	1.90158		98.0481	98.0481	97.1319	99.8935	94.8235		97.589	0.824285		93.0029	100.932	95.6443	94.9064	99.5671		96.8106	1.48445		97.3254	96.9697	96.1606	92.4413	94.9109		95.5616	0.883525		89.7959	91.8367	95.183
191.628		100.132	99.7525	100.78	97.558	101.909		100.026	0.717353		96.1318	104.762	96.1612	92.6082	98.0645		97.5455	2.00795		100	100	97.1319	98.8285	99.2941		99.0509	0.528802		96.3557	100.932	94.3739	96.1539	102.165		97.9961	1.50338		95.6909	95.1049	97.5567	93.4627	97.7099		95.905	0.794878		95.2904	91.8367	93.0636
193.616		97.3649	95.0495	102.144	99.3895	101.193		99.0283	1.28694		93.8395	99.7732	99.2322	96.3041	99.7849		97.7868	1.17913		98.1982	98.1982	95.7935	99.8935	98.1176		98.0402	0.653388		94.3149	98.3683	93.2849	94.6985	95.4545		95.2242	0.860301		94.7994	93.7063	97.0332	91.9305	98.2188		95.1376	1.12994		91.6797	90.051	95.7611
195.609		96.9697	97.7723	105.263	97.558	103.103		100.133	1.69333		97.2779	105.896	96.1612	93.0306	103.011		99.0753	2.34805		95.1952	95.1952	101.147	100.213	92.2353		96.7972	1.68128		90.9621	99.7669	95.6443	95.9459	98.052		96.0742	1.48126		98.9599	93.2401	98.2548	96.2206	99.2366		97.1824	1.11795		95.2904	92.602	95.7611
197.595		96.9697	94.5545	100.975	98.2906	99.5227		98.0624	1.09922		93.4097	96.3719	102.111	95.6705	97.4193		96.9966	1.43794		95.4955	95.4955	96.3671	98.2961	94.5882		96.0485	0.628372		91.3994	99.3007	92.3775	98.2328	98.9177		96.0456	1.71276		96.8796	91.8415	96.1606	91.7262	96.1832		94.5582	1.14013		90.1099	96.1735	95.7611
199.593		99.6047	101.238	107.602	99.5116	99.284		101.448	1.57718		97.1347	102.948	98.2725	95.3538	100.86		98.9138	1.34744		98.3483	98.3483	98.2792	102.13	94.3529		98.2917	1.22988		93.4402	100	97.0962	94.1788	96.1039		96.1638	1.16076		97.0282	94.6387	100.349	92.952	97.4555		96.4847	1.26607		94.3485	91.5816	91.3295
201.579		96.9697	99.0099	103.314	99.3895	102.148		100.166	1.14002		97.9943	100.68	98.0806	95.5649	99.1398		98.292	0.836448		100.3	100.3	97.5143	99.6805	93.4118		98.2414	1.31155		95.1895	96.9697	93.4664	95.5302	97.4026		95.7117	0.699594		95.9881	96.7366	94.4154	94.5863	93.8931		95.1239	0.531671		93.2496	92.3469	94.4123
203.571		97.4967	100.248	102.534	94.8718	101.909		99.4119	1.43115		94.2693	102.268	94.4338	94.509	97.6344		96.6228	1.54412		98.4985	98.4985	96.7495	96.0596	96.2353		97.2083	0.538789		93.586	98.8345	92.0145	96.2578	99.7836		96.0953	1.48462		97.9198	93.4732	95.1134	92.952	97.4555		95.3828	1.00896		89.7959	93.8775	89.9807
205.56		94.7299	99.7525	110.136	99.1453	98.8067		100.514	2.56336		94.9857	102.041	95.0096	92.5026	100.43		96.9938	1.8086		96.997	96.997	101.721	99.148	98.5882		98.6902	0.870011		90.8163	101.865	95.4628	96.7776	98.052		96.5947	1.79724		96.731	95.338	99.651	91.9305	91.0941		94.9489	1.57173		98.7441	94.3878	92.6782
207.553		96.8379	98.7624	108.187	100.733	102.387		101.381	1.93973		94.8424	99.3197	99.4242	94.2978	100.86		97.7489	1.32876		94.8949	94.8949	99.2352	100.639	98.3529		97.6034	1.16429		93.4402	100.699	93.6479	96.0499	98.2684		96.4211	1.38617		98.2169	92.3077	98.6038	90.2962	96.6921		95.2234	1.66319		92.7786	89.5408	89.4027
209.542		99.0777	101.238	99.4152	98.5348	98.8067		99.4144	0.478562		95.5587	102.721	93.858	92.8194	102.15		97.4215	2.0952		96.997	96.997	99.4264	94.6752	96		96.8191	0.778734		94.6064	100	95.6443	99.6881	99.7836		97.9445	1.16364		96.1367	93.9394	96.3351	92.237	92.6209		94.2538	0.857611		88.383	95.9184	94.4123
211.536		100.79	96.7822	105.458	94.0171	99.5227		99.3141	1.92926		96.5616	100.907	102.495	96.8321	95.914		98.542	1.32237		97.8979	97.8979	95.9847	99.0415	92.4706		96.6585	1.15637		91.5452	101.865	95.8258	97.817	98.052		97.021	1.68184		100.149	92.3077	98.9529	93.4627	97.7099		96.5164	1.5426		90.7378	91.8367	95.183
213.522		100.263	96.2871	103.509	100.122	100		100.036	1.144		93.553	99.093	97.8887	90.8131	97.8495		95.8394	1.5703		93.5435	93.5435	97.8967	97.4441	93.8824		95.2621	0.987752		91.1079	99.5338	91.2886	95.5302	98.4848		95.189	1.75678		93.3135	93.7063	96.5096	92.0327	93.3842		93.7893	0.737667		91.2088	95.6633	95.183
215.515		99.2095	99.7525	99.8051	96.5812	100.477		99.1651	0.676571		96.4183	102.721	96.737	93.6642	96.7742		97.263	1.48275		93.0931	93.0931	97.5143	99.2545	98.3529		96.2616	1.32249		90.379	101.632	93.8294	94.6985	95.4545		95.1986	1.82761		95.5423	96.0373	97.0332	91.522	94.1476		94.8565	0.954575		93.5636	91.5816	93.2563
217.504		99.7365	100.99	109.942	99.7558	99.7613		102.037	1.99063		99.5702	103.628	100.768	95.2481	98.0645		99.4558	1.39252		97.4475	97.4475	101.147	99.8935	94.5882		98.1048	1.13327		89.9417	99.7669	96.3702	95.7381	98.2684		96.0171	1.67694		94.6508	94.4056	96.6841	92.4413	97.9644		95.2292	0.958734		92.9356	94.6429	92.2929
219.498		97.6285	96.5346	107.017	97.4359	102.864		100.296	2.01515		93.553	102.268	95.7773	96.4097	100.43		97.6876	1.59491		100.451	100.451	95.0287	95.7401	96.4706		97.6281	1.17459		88.7755	99.7669	93.6479	98.5447	95.8875		95.3245	1.95092		99.4056	93.4732	97.3822	93.667	94.9109		95.7678	1.14571		87.4411	90.051	93.4489
221.488		97.892	96.5346	102.144	95.7265	99.7613		98.4117	1.15665		96.8481	103.401	95.5854	95.037	99.3548		98.0453	1.53194		94.4444	94.4444	99.4264	96.6986	96.2353		96.2498	0.916816		89.9417	99.0676	88.7477	93.1393	99.7836		94.136	2.27854		95.2452	91.6084	97.5567	93.9734	92.6209		94.2009	1.03974		90.2669	93.3674	98.4586
223.48		98.8142	100	98.2456	100.366	100.955		99.6762	0.500261		90.5444	102.721	95.5854	94.6146	100.43		96.7791	2.16355		95.6457	95.6457	101.912	98.6155	98.1176		97.9873	1.15719		91.1079	98.3683	92.559	98.3368	97.6191		95.5982	1.55976		95.8395	95.8042	98.2548	91.1134	91.8575		94.5739	1.34198		93.0926	89.5408	90.3661
225.465		99.2095	97.0297	111.696	97.4359	102.625		101.599	2.71035		99.7135	99.5465	99.0403	94.9314	99.5699		98.5603	0.914365		96.997	96.997	94.8375	100.426	99.7647		97.8044	1.02034		89.5044	95.8042	92.559	96.5696	95.8875		94.0649	1.33579		97.474	93.2401	94.7644	90.1941	97.4555		94.6256	1.37293		90.7378	93.1122	92.8709
227.456		100.395	96.5346	106.238	99.8779	99.284		100.466	1.58929		93.2665	100.454	95.0096	91.4467	99.5699		95.9492	1.75714		97.5976	97.5976	95.0287	99.787	96.4706		97.2963	0.781316		93.586	95.5711	92.3775	95.1144	98.7013		95.0701	1.06984		97.9198	97.9021	99.651	91.3177	96.4377		96.6456	1.42591		90.7378	92.602	92.4856
229.444		100	100.743	110.526	104.518	102.387		103.635	1.88954		95.4155	102.948	99.0403	93.1362	100.645		98.237	1.7694		95.3453	95.3453	97.1319	97.4441	94.8235		96.0181	0.529445		92.7114	96.7366	94.5554	97.4013	96.1039		95.5017	0.841945		97.474	92.0746	95.986	90.1941	94.6565		94.077	1.31542		89.7959	89.7959	93.4489
231.435		97.3649	101.485	109.942	99.2674	97.852		101.182	2.30375		95.9885	104.989	96.1612	90.1795	101.075		97.6787	2.51366		97.4475	97.4475	97.1319	100.213	95.0588		97.4597	0.820141		92.4198	97.2028	90.7441	97.921	95.8875		94.835	1.39295		97.1768	94.1725	95.986	90.0919	92.6209		94.0096	1.24982		91.5228	92.3469	94.2197
233.423		94.7299	96.0396	102.729	99.2674	101.671		98.8873	1.54989		93.1232	103.175	94.6257	91.5523	98.4946		96.1941	2.09113		93.8438	93.8438	95.7935	94.5687	93.8824		94.3864	0.377887		91.691	96.2704	93.4664	99.8961	98.9177		96.0483	1.5611		98.3655	96.0373	97.2077	91.0112	94.1476		95.3539	1.2901		88.854	89.5408	93.8343
235.418		97.6285	99.0099	106.433	98.1685	100.477		100.343	1.59651		95.2722	103.175	96.929	89.6515	98.7097		96.7474	2.21043		95.9459	95.9459	100	100	95.2941		97.4372	1.053		90.6706	96.5035	91.6515	96.5696	96.5368		94.3864	1.32589		96.2853	93.2401	99.8255	89.3769	97.7099		95.2875	1.82461		90.7378	89.2857	90.3661
237.404		95.5204	99.2574	101.754	97.1917	101.671		99.0789	1.22742		93.9828	96.8254	98.6564	92.1859	96.129		95.5559	1.12662		98.1982	98.1982	95.7935	94.1427	99.0588		97.0783	0.913762		89.7959	96.9697	91.1071	97.4013	96.7532		94.4054	1.63079		94.7994	95.338	97.7312	91.2155	94.9109		94.799	1.04265		94.1915	91.8367	92.6782
239.399		101.317	100.99	104.483	97.8022	100.239		100.966	1.07319		99.8567	99.093	95.2015	96.1985	94.6237		96.9947	1.05036		94.8949	94.8949	99.4264	97.7636	99.5294		97.3018	1.0314		94.7522	95.8042	91.4701	95.5302	96.7532		94.862	0.906322		95.8395	90.9091	98.2548	90.7048	94.1476		93.9712	1.4477		93.7206	90.3061	92.2929
241.389		99.3412	98.5148	99.4152	94.0171	102.387		98.735	1.3504		98.1375	104.082	96.5451	93.6642	97.8495		98.0556	1.70188		94.1441	94.1441	97.5143	93.1842	93.4118		94.4797	0.782718		92.2741	97.2028	92.922	100.312	100.433		96.6287	1.74743		100.297	95.5711	95.986	89.7855	94.402		95.2084	1.6836		85.7143	91.5816	92.1002
243.381		100.263	98.7624	102.144	97.1917	100.955		99.8633	0.863229		93.2665	103.855	97.3129	93.3474	95.4839		96.6531	1.95019		95.0451	95.0451	97.8967	99.2545	95.7647		96.6012	0.844439		92.2741	98.6014	90.9256	96.9855	101.082		95.9738	1.91307		99.4056	93.7063	96.5096	90.2962	94.402		94.864	1.5125		90.5808	91.0714	93.0636
245.373		97.6285	98.7624	113.645	98.779	103.103		102.384	2.96697		92.9799	101.814	97.1209	93.2418	98.9247		96.8163	1.68835		97.1471	97.1471	93.3078	96.9116	96		96.1027	0.729996		90.8163	98.1352	95.4628	95.5302	96.1039		95.2097	1.20055		97.7712	92.5408	97.7312	91.2155	96.4377		95.1393	1.36892		90.4239	90.8163	93.2563
247.366		97.892	98.0198	109.162	98.1685	104.057		101.46	2.25237		94.8424	96.1451	96.737	90.4963	96.7742		94.999	1.17865		92.1922	92.1922	95.9847	94.3557	96.9412		94.3332	0.966886		92.1283	98.1352	92.196	93.2432	98.2684		94.7942	1.40527		97.9198	93.4732	96.1606	91.7262	92.8753		94.431	1.13613		91.5228	90.8163	91.7148
249.355		98.5507	95.5446	102.339	95.9707	97.852		98.0514	1.21012		95.2722	101.134	93.858	95.5649	92.043		95.5744	1.5234		100.15	100.15	95.7935	96.2726	94.1176		97.2968	1.2186		92.1283	95.338	90.3811	98.025	97.4026		94.655	1.48362		97.7712	89.0443	95.8115	90.2962	95.9287		93.7704	1.721		89.4819	88.0102	92.8709
251.345		100.527	97.0297	109.747	96.9475	101.671		101.184	2.33659		94.9857	102.948	92.3225	93.3474	96.9892		96.1185	1.88109		95.6457	95.6457	96.5583	93.8232	94.5882		95.2522	0.474256		94.6064	102.098	94.9183	97.7131	97.4026		97.3477	1.34383		93.9079	95.1049	94.4154	89.1726	94.402		93.4006	1.07402		92.1507	87.2449	93.6416
253.332		96.5744	101.485	109.552	99.5116	98.8067		101.186	2.23389		94.8424	103.855	92.7063	91.8691	96.129		95.8803	2.13187		95.3453	95.3453	98.4704	95.6337	92		95.3589	1.02565		90.6706	98.6014	91.6515	93.2432	96.5368		94.1407	1.4947		92.422	92.7739	96.1606	91.6241	95.1654		93.6292	0.86536		87.5981	92.0918	96.7245
255.324		96.4427	99.7525	100.585	97.558	102.864		99.4404	1.13265		98.1375	102.268	93.666	92.1859	97.4193		96.7353	1.77705		97.2973	97.2973	96.3671	97.2311	93.6471		96.368	0.702697		91.2536	100.932	92.7405	93.3472	98.9177		95.4383	1.89016		93.6107	90.9091	95.637	88.5597	93.8931		92.5219	1.24638		89.4819	86.4796	94.9904
257.312		98.1555	94.802	104.094	98.779	95.4654		98.2591	1.64437		95.9885	102.721	99.2322	96.7265	93.7634		97.6864	1.53186		97.7477	97.7477	99.044	99.787	92.2353		97.3124	1.32812		87.6093	98.6014	94.0109	96.2578	99.5671		95.2093	2.13063		93.7593	96.7366	94.5899	87.6405	93.3842		93.2221	1.51149		91.3658	92.0918	92.4856
259.305		101.317	99.5049	101.559	94.3834	101.193		99.5917	1.35185		97.7077	100.454	95.3935	90.7075	94.6237		95.7772	1.62442		98.3483	98.3483	98.088	94.5687	95.7647		97.0236	0.782756		91.9825	96.9697	89.2922	93.1393	98.052		93.8871	1.61475		92.422	93.7063	94.9389	91.6241	93.1298		93.1642	0.564244		88.697	94.1326	90.3661
261.293		99.0777	95.7921	100.78	97.1917	101.671		98.9024	1.0913		94.4126	99.3197	97.8887	94.0866	96.7742		96.4964	1.0034		98.0481	98.0481	97.3231	96.9116	98.1176		97.6897	0.242875		91.5452	96.2704	92.559	96.5696	97.4026		94.8694	1.17599		96.4339	93.4732	96.1606	90.0919	94.9109		94.2141	1.15635		89.9529	91.8367	91.7148
263.283		97.4967	100	107.992	100.366	102.387		101.648	1.76616		91.404	102.948	97.8887	93.2418	96.3441		96.3653	2.00026		95.0451	95.0451	96.3671	96.5921	95.7647		95.7628	0.322746		92.1283	96.5035	93.4664	94.6985	100.866		95.5325	1.51558		93.7593	96.0373	96.8586	86.7211	96.1832		93.9119	1.87203		87.1272	91.3265	89.5954
265.272		96.4427	98.5148	107.407	100.366	100.239		100.594	1.84603		91.1175	104.535	95.3935	92.0803	94.6237		95.55	2.38014		93.3934	93.3934	96.9407	96.9116	95.7647		95.2808	0.799178		90.8163	97.669	92.3775	95.2183	96.5368		94.5236	1.28021		95.8395	90.9091	93.0192	90.2962	91.603		92.3334	0.986797		86.8132	94.1326	89.21
267.268		97.1014	101.238	98.4406	96.0928	97.6134		98.0972	0.872446		95.2722	100.907	97.6967	91.9747	93.1183		95.7938	1.60907		97.2973	97.2973	97.5143	94.4622	96.7059		96.6554	0.56456		90.5248	99.0676	91.4701	96.0499	95.4545		94.5134	1.56778		92.5706	93.9394	94.5899	89.0705	92.6209		92.5582	0.954036		87.4411	84.4388	93.8343
269.254		100.922	98.5148	100.975	100.122	102.148		100.536	0.599858		92.8367	100.907	97.1209	91.4467	96.5591		95.7741	1.67529		97.2973	97.2973	94.8375	97.3376	92.7059		95.8951	0.930129		90.8163	93.7063	91.6515	97.1933	97.1861		94.1107	1.34211		94.6508	92.7739	94.9389	90.5005	97.7099		94.1148	1.19901		87.1272	94.6429	91.5222
271.247		99.3412	98.7624	102.924	97.0696	101.671		99.9536	1.04601		97.1347	103.855	95.3935	90.6019	96.3441		96.6658	2.12598		98.0481	98.0481	97.1319	97.3376	95.5294		97.219	0.461032		88.484	95.5711	94.9183	95.5302	96.7532		94.2514	1.47214		97.1768	94.1725	97.5567	90.1941	96.9466		95.2093	1.38973		89.6389	90.051	92.2929
273.235		97.6285	99.0099	101.949	98.779	98.568		99.1869	0.729394		97.5645	101.361	95.5854	92.7138	98.9247		97.2298	1.46877		95.4955	95.4955	97.3231	94.1427	95.5294		95.5973	0.505949		92.1283	99.0676	92.7405	99.6881	98.052		96.3353	1.61672		94.6508	91.1422	93.5428	90.6027	91.0941		92.2065	0.796953		87.5981	90.8163	89.788
275.226		95.6522	96.7822	102.534	94.5055	103.341		98.563	1.82633		96.2751	104.082	91.5547	93.453	92.6882		95.6105	2.25661		98.1982	98.1982	95.4111	98.8285	97.4118		97.6096	0.593772		91.2536	100.233	89.1107	95.9459	96.9697		94.7026	2.00545		94.5022	94.6387	97.2077	87.7426	92.6209		93.3424	1.57868		86.0283	91.0714	92.8709
277.213		97.6285	96.5346	104.288	97.0696	101.909		99.4861	1.53193		93.9828	97.2789	96.929	95.2481	93.3333		95.3544	0.779754		96.997	96.997	100	97.9766	95.7647		97.5471	0.706516		88.1924	96.9697	91.6515	95.1144	96.9697		93.7795	1.70118		96.731	93.7063	95.8115	88.3555	94.1476		93.7504	1.45598		87.5981	89.7959	92.1002
279.208		101.844	95.7921	100.195	98.779	100.955		99.513	1.05744		96.5616	98.4127	94.0499	92.7138	95.6989		95.4874	0.987804		95.4955	95.4955	94.4551	91.9063	93.6471		94.1999	0.670395		93.1487	100.932	90.9256	93.3472	98.9177		95.4543	1.90092		96.1367	95.1049	96.5096	87.0276	93.6387		93.6835	1.73679		90.7378	91.8367	90.9441
281.196		100.395	94.5545	102.339	97.9243	96.6587		98.3744	1.37007		92.2636	103.855	96.3532	93.2418	98.4946		96.8416	2.07453		99.3994	99.3994	98.4704	96.4856	95.0588		97.7627	0.86024		90.5248	99.3007	90.3811	95.1144	98.4848		94.7612	1.8938		97.0282	90.4429	92.1466	89.3769	93.3842		92.4758	1.3303		87.7551	92.0918	88.2466
283.19		100.659	97.5247	103.314	91.5751	100.716		98.7577	2.0164		93.1232	102.948	95.7773	93.5586	96.129		96.3072	1.76214		98.3483	98.3483	92.3518	94.1427	92.7059		95.1794	1.32802		90.5248	97.4359	91.6515	96.8815	100		95.2987	1.80648		92.2734	94.4056	94.0663	90.3984	95.6743		93.3636	0.919239		85.8713	90.5612	88.8247
285.178		98.2872	100	102.534	97.9243	99.5227		99.6537	0.815227		94.6991	100.68	96.1612	92.925	92.043		95.3017	1.52149		97.2973	97.2973	96.3671	93.8232	95.5294		96.0629	0.649646		91.691	100.233	92.3775	97.817	95.4545		95.5146	1.61293		92.8678	93.4732	93.3682	88.3555	93.6387		92.3407	1.00457		87.2841	88.2653	89.9807
287.17		96.4427	100	99.8051	94.3834	99.7613		98.0785	1.13655		93.6963	102.948	94.8177	91.4467	95.914		95.7645	1.94216		96.6967	96.6967	97.3231	92.0128	93.6471		95.2753	1.03754		90.6706	96.7366	88.7477	93.2432	97.8355		93.4467	1.73081		95.2452	91.8415	93.3682	92.237	94.6565		93.4697	0.661125		87.2841	88.0102	87.6686
289.16		96.5744	96.0396	101.754	99.8779	100.955		99.0402	1.15796		91.9771	102.494	96.929	91.1299	94.6237		95.4308	2.03979		96.6967	96.6967	95.7935	96.9116	94.8235		96.1844	0.391057		91.5452	98.1352	89.2922	96.2578	96.3204		94.3101	1.66268		96.2853	94.4056	94.5899	86.1083	90.8397		92.4457	1.81554		87.2841	91.3265	89.4027
291.154		97.4967	95.5446	105.068	94.6276	103.58		99.2634	2.13038		93.6963	99.3197	95.3935	93.7698	95.914		95.6187	1.02347		96.2463	96.2463	99.4264	96.5921	94.1176		96.5257	0.847741		96.3557	94.8718	92.0145	94.4906	96.5368		94.8539	0.81492		93.3135	92.5408	93.5428	92.7477	93.3842		93.1058	0.194817		90.2669	92.602	89.0173
293.142		96.0474	100.248	109.357	99.2674	98.0907		100.602	2.29785		95.2722	101.587	95.7773	92.5026	95.0538		96.0387	1.49861		96.0961	96.0961	94.4551	95.5272	92.7059		94.9761	0.641788		92.8571	98.1352	90.7441	95.7381	97.8355		95.062	1.43352		94.6508	91.6084	93.3682	90.3984	93.8931		92.7838	0.778775		88.854	92.602	86.8979
295.137		100.922	100.743	98.6355	97.4359	101.193		99.7859	0.742746		95.5587	102.721	92.8983	91.8691	92.9032		95.1901	1.97944		94.5946	94.5946	98.2792	95.1012	95.5294		95.6198	0.687439		90.5248	100.466	88.9292	97.5052	96.1039		94.7059	2.16591		97.6226	94.8718	94.7644	88.9683	91.0941		93.4643	1.52961		88.54	92.0918	88.8247
297.125		100.79	95.7921	109.552	99.0232	100		101.031	2.29348		96.2751	101.587	95.5854	91.7635	95.914		96.225	1.56793		95.6457	95.6457	96.3671	94.1427	92.4706		94.8543	0.697478		94.1691	102.098	96.0073	97.4013	95.4545		97.026	1.36993		91.9762	92.0746	93.7173	93.2584	95.1654		93.2384	0.586964		86.9702	89.2857	89.4027
299.118		96.3109	94.5545	106.823	97.6801	104.773		100.028	2.42872		94.1261	100.227	95.7773	90.0739	100.215		96.0838	1.92714		95.1952	95.1952	98.2792	95.7401	94.3529		95.7525	0.669481		93.0029	96.9697	91.4701	96.5696	93.9394		94.3903	1.05021		93.1649	93.9394	93.7173	89.2748	93.8931		92.7979	0.891486		85.4003	93.1122	86.8979
301.108		96.9697	95.7921	107.017	97.1917	100		99.3942	2.02714		97.2779	104.989	95.9693	90.3907	96.9892		97.1232	2.32987		95.6457	95.6457	97.8967	97.7636	92.2353		95.8374	1.02469		91.8367	96.0373	89.2922	93.8669	93.0736		92.8214	1.11632		92.7192	93.2401	92.3211	91.2155	93.1298		92.5251	0.36545		87.1272	86.9898	91.5222
303.101		96.5744	96.7822	108.967	94.9939	97.852		99.0339	2.5249		93.1232	99.7732	94.6257	93.5586	99.1398		96.0441	1.41793		97.2973	97.2973	102.103	93.5037	96		97.2403	1.39921		88.484	101.632	90.7441	95.3222	95.8875		94.4139	2.27733		94.5022	90.4429	97.0332	87.6405	93.1298		92.5497	1.62465		88.383	91.8367	85.7418
305.091		96.4427	95.5446	106.043	96.8254	99.5227		98.8756	1.91059		93.9828	100.68	93.858	92.2914	93.3333		94.8292	1.49286		95.9459	95.9459	96.5583	98.722	93.8824		96.2109	0.774244		92.8571	99.5338	90.0182	97.6091	96.9697		95.3976	1.73007		93.7593	95.1049	95.986	86.619	92.8753		92.8689	1.65182		87.2841	89.5408	92.8709
307.084		96.3109	99.7525	105.653	95.4823	102.148		99.8693	1.87836		98.8539	103.855	95.5854	87.2228	90.1075		95.1249	2.98284		96.6967	96.6967	97.1319	97.2311	94.5882		96.4689	0.482764		89.2128	95.338	88.3847	94.5946	98.4848		93.203	1.91742		93.0163	93.2401	94.0663	85.904	94.1476		92.0749	1.55862		85.8713	92.0918	89.4027
309.073		100.263	100.248	103.509	94.2613	98.0907		99.2744	1.52295		95.9885	98.1859	92.7063	89.0179	95.0538		94.1905	1.56365		96.6967	96.6967	95.7935	94.8882	94.1176		95.6385	0.50693		90.5248	95.338	85.4809	95.1144	93.0736		91.9063	1.82517		95.6909	93.4732	93.8918	87.1297	95.1654		93.0702	1.53923		90.1099	89.2857	90.5588
311.066		100.395	98.0198	104.483	95.116	99.284		99.4597	1.53435		92.8367	99.5465	93.666	93.981	92.2581		94.4577	1.30797		100.451	100.451	97.7055	95.3142	95.0588		97.7959	1.17798		93.4402	96.5035	90.0182	93.8669	95.2381		93.8134	1.09116		93.1649	92.5408	95.8115	93.8713	90.0763		93.093	0.932911		86.1852	86.4796	87.8613
313.052		97.4967	98.0198	107.992	97.6801	100.716		100.381	1.99037		93.6963	100.68	92.8983	91.1299	93.9785		94.4766	1.62841		93.6937	93.6937	95.9847	98.2961	96.7059		95.6748	0.89106		94.3149	98.8345	94.3739	97.5052	98.7013		96.7459	1.00744		93.6107	88.8112	92.3211	85.2911	93.3842		90.6837	1.59887		86.0283	87.2449	86.8979
315.045		98.5507	99.2574	109.552	92.674	98.3294		99.6726	2.7369		91.6905	100.227	92.8983	90.6019	94.8387		94.0512	1.69644		93.6937	93.6937	98.6616	95.8466	92.4706		94.8732	1.09212		91.1079	96.9697	92.196	96.4657	94.5887		94.2656	1.15134		92.422	95.1049	95.637	88.2533	91.0941		92.5023	1.35357		87.2841	88.0102	85.7418
317.03		97.4967	96.5346	107.602	99.6337	99.284		100.11	1.95775		90.6877	100.68	94.0499	93.3474	95.4839		94.8498	1.65253		94.4444	94.4444	95.4111	96.3791	94.1176		94.9594	0.415847		89.5044	97.2028	92.0145	95.0104	100		94.7464	1.85265		92.5706	92.0746	94.2408	88.9683	93.6387		92.2986	0.916048		86.3422	92.8571	88.632
319.023		100.659	99.7525	104.288	97.9243	98.8067		100.286	1.10022		90.1146	100.907	96.5451	87.5396	94.8387		93.989	2.36347		95.9459	95.9459	97.3231	95.3142	97.4118		96.3882	0.416324		91.691	96.7366	91.6515	96.4657	94.5887		94.2267	1.10692		95.5423	90.2098	91.0995	87.5383	87.7863		90.4352	1.44886		88.383	87.7551	89.788
321.012		99.2095	99.5049	107.017	97.4359	100		100.634	1.65352		93.553	97.9592	97.3129	87.8564	95.0538		94.347	1.80419		95.9459	95.9459	98.4704	93.2907	90.3529		94.8012	1.38116		91.2536	97.9021	91.2886	94.0748	98.052		94.5142	1.5037		93.3135	92.0746	93.1937	90.6027	94.6565		92.7682	0.678776		87.7551	86.9898	88.8247
323.007		100.132	98.2673	109.357	96.9475	98.568		100.654	2.23378		94.4126	102.721	95.9693	92.2914	93.3333		95.7456	1.84709		97.5976	97.5976	96.9407	92.3323	94.8235		95.8583	1.01798		95.9184	96.2704	92.559	96.0499	95.0216		95.1639	0.684997		95.0966	88.8112	95.8115	89.1726	92.112		92.2008	1.45069		88.2261	87.5	90.9441
324.995		97.7602	95.297	108.187	98.1685	99.7613		99.8348	2.20724		91.5473	101.134	93.858	88.5956	93.7634		93.7796	2.07302		95.4955	95.4955	95.0287	91.5868	89.6471		93.4507	1.19988		90.2332	93.9394	90.7441	95.0104	96.3204		93.2495	1.19125		90.3418	96.5035	99.1274	87.7426	91.3486		93.0128	2.08869		85.5573	89.5408	89.4027
326.991		97.892	98.5148	98.4406	94.2613	101.671		98.1559	1.179		91.8338	103.175	95.2015	92.8194	97.8495		96.1758	2.03533		97.7477	97.7477	96.1759	93.6102	92.7059		95.5975	1.04624		89.0671	95.8042	91.2886	93.9709	98.052		93.6365	1.59216		92.5706	96.5035	96.1606	90.1941	93.1298		93.7117	1.1791		87.2841	88.7755	91.5222
328.981		99.473	98.0198	103.899	97.0696	99.284		99.549	1.1722		94.4126	104.762	93.858	90.2851	97.8495		96.2334	2.44629		97.7477	97.7477	97.1319	96.8051	93.8824		96.663	0.718522		89.0671	98.8345	92.0145	97.817	98.7013		95.2869	2.0005		92.2734	93.2401	95.1134	91.0112	91.0941		92.5465	0.761944		91.0518	88.7755	88.2466
330.977		98.1555	98.0198	105.458	93.895	100.955		99.2966	1.90818		91.2607	100.907	94.8177	90.1795	93.7634		94.1857	1.87561		95.0451	95.0451	96.5583	93.8232	95.0588		95.1061	0.433844		93.2945	96.9697	92.922	96.9855	99.3507		95.9044	1.22243		92.8678	91.8415	94.9389	85.6997	93.8931		91.8482	1.62139		85.4003	92.0918	89.9807
332.969		101.186	98.5148	100.78	95.6044	103.819		99.9807	1.3806		94.1261	102.041	94.0499	91.5523	92.9032		94.9345	1.83713		93.3934	93.3934	93.499	95.6337	93.8824		93.9604	0.427885		89.3586	95.8042	89.1107	96.9855	96.9697		93.6457	1.81394		89.3016	96.2704	91.274	87.9469	89.8219		90.923	1.43904		87.1272	86.7347	89.5954
334.963		100.922	98.5148	105.068	98.1685	100		100.535	1.23829		94.4126	101.361	94.6257	88.1732	94.1936		94.5531	2.08804		95.4955	95.4955	94.4551	94.0362	93.4118		94.5788	0.409413		93.586	98.8345	90.5626	95.2183	96.3204		94.9044	1.38091		92.2734	93.2401	93.8918	85.8018	91.3486		91.3111	1.44327		86.1852	86.7347	85.9345
336.951		94.8617	95.7921	105.068	97.6801	98.8067		98.4417	1.79528		95.8453	99.5465	91.3628	93.1362	89.6774		93.9136	1.7395		94.2943	94.2943	95.7935	94.0362	94.8235		94.6484	0.313647		91.2536	99.5338	92.0145	95.1144	97.8355		95.1504	1.6038		91.9762	96.0373	92.8447	88.4576	92.112		92.2856	1.20763		83.9874	88.7755	86.8979
338.948		96.3109	100.495	101.949	94.2613	99.7613		98.5556	1.41795		93.4097	101.814	96.737	90.6019	94.4086		95.3943	1.88274		95.3453	95.3453	96.7495	93.1842	93.8824		94.9014	0.624373		87.6093	99.0676	88.7477	96.5696	95.8875		93.5764	2.2735		92.7192	94.4056	94.9389	85.6997	92.3664		92.026	1.65478		86.3422	89.2857	87.8613
340.939		100.527	94.5545	105.068	94.9939	97.6134		98.5514	1.94786		93.8395	96.3719	92.8983	88.5956	95.4839		93.4378	1.35453		94.8949	94.8949	96.1759	92.8648	94.8235		94.7308	0.530704		90.379	97.669	89.4737	98.025	97.6191		94.6331	1.92814		92.8678	93.9394	91.9721	86.0061	92.3664		91.4304	1.39559		86.4992	90.051	87.6686
342.933		98.0237	96.5346	101.949	96.2149	100.955		98.7355	1.16097		95.2722	103.855	92.5144	89.7571	89.2473		94.1292	2.65943		98.9489	98.9489	96.5583	90.7348	94.5882		95.9559	1.53964		92.2741	95.338	92.0145	93.763	98.7013		94.4182	1.22465		90.4903	91.3753	96.8586	88.3555	93.8931		92.1946	1.46549		88.383	88.5204	90.3661
344.925		96.5744	95.0495	100	97.6801	96.4201		97.1448	0.82703		91.9771	99.093	96.5451	91.6579	95.6989		94.9944	1.41308		96.2463	96.2463	98.6616	93.9297	95.2941		96.0756	0.773338		86.0058	94.4056	92.196	97.817	99.5671		93.9983	2.3758		92.2734	97.4359	94.0663	84.9847	90.5852		91.8691	2.06184		84.4584	88.7755	88.2466
346.921		98.0237	98.0198	109.162	94.6276	95.7041		99.1074	2.59903		93.1232	99.093	96.3532	87.962	93.1183		93.9299	1.86353		93.5435	93.5435	94.6463	92.5453	93.6471		93.5851	0.332764		88.3382	101.632	90.9256	96.8815	96.7532		94.906	2.36146		94.948	92.5408	96.3351	88.3555	91.0941		92.6547	1.40954		88.383	89.0306	85.5491
348.907		101.449	98.2673	108.382	93.6508	100.477		100.445	2.39699		94.4126	99.3197	91.9386	90.1795	96.3441		94.4389	1.61008		94.7447	94.7447	100.191	94.9947	92.7059		95.4762	1.24916		89.2128	96.7366	96.1887	95.0104	100.216		95.473	1.78904		91.9762	92.3077	94.7644	89.7855	95.6743		92.9016	1.05064		85.4003	89.5408	90.1734
350.903		96.3109	100	107.213	96.4591	99.284		99.8533	1.98207		87.8224	103.175	93.2822	93.1362	96.129		94.7089	2.50618		91.2913	91.2913	98.2792	97.5506	92.9412		94.2707	1.52228		88.484	95.338	90.3811	95.1144	94.3723		92.7379	1.39157		95.9881	91.3753	94.7644	87.4362	93.3842		92.5896	1.49906		85.2433	89.0306	87.2832
352.889		98.0237	95.7921	110.721	97.8022	101.193		100.707	2.64873		93.9828	103.175	95.0096	90.0739	91.828		94.8138	2.25847		91.7417	91.7417	99.044	94.2492	95.2941		94.4142	1.3513		86.4432	95.8042	92.559	95.4262	98.9177		93.8301	2.10371		93.3135	91.1422	94.0663	85.6997	88.8041		90.6052	1.53152		86.1852	89.0306	87.6686
354.883		95.9157	99.0099	112.865	94.3834	100.239		100.483	3.26819		92.9799	103.401	93.2822	92.5026	91.1828		94.6698	2.21221		99.3994	99.3994	94.2639	95.6337	92.2353		96.1863	1.4188		86.1516	95.5711	91.4701	96.7776	92.8571		92.5655	1.86008		93.0163	93.2401	95.8115	89.5812	93.3842		93.0067	0.994939		85.5573	90.3061	87.6686
356.872		98.5507	99.5049	108.382	93.4066	98.8067		99.7302	2.42011		91.8338	103.401	93.4741	93.6642	96.3441		95.7435	2.0465		96.997	96.997	94.6463	90.9478	93.1765		94.5529	1.1586		89.6501	94.4056	93.1034	95.9459	98.052		94.2314	1.41115		91.9762	94.1725	92.3211	87.334	93.1298		91.7867	1.17567		87.4411	91.0714	86.7052
358.865		97.892	98.2673	109.552	97.3138	99.5227		100.509	2.28939		91.5473	104.535	93.4741	92.7138	93.5484		95.1637	2.37031		94.8949	94.8949	96.9407	89.3504	93.4118		93.8985	1.26813		89.2128	96.5035	89.4737	92.6195	96.9697		92.9559	1.65749		89.3016	92.0746	92.6702	91.7262	94.1476		91.984	0.788088		86.3422	87.5	87.2832
360.853		97.7602	95.297	110.136	94.9939	99.5227		99.5421	2.776		96.5616	103.401	96.3532	89.7571	95.6989		96.3544	2.16399		96.6967	96.6967	96.1759	93.5037	99.2941		96.4734	0.920968		90.6706	96.5035	91.1071	99.5842	97.6191		95.0969	1.78867		91.2333	91.1422	90.0524	89.7855	94.6565		91.374	0.869435		83.3595	91.0714	87.0906
362.851		94.3346	93.5644	103.899	96.0928	95.7041		96.7189	1.8521		90.2579	103.401	94.0499	92.0803	93.5484		94.6676	2.28094		95.6457	95.6457	99.044	95.8466	94.3529		96.107	0.780898		87.6093	97.9021	94.3739	96.0499	97.8355		94.7541	1.901		91.3819	93.007	93.7173	89.8876	89.313		91.4614	0.853715		84.3014	88.5204	88.632
364.842		98.2872	98.7624	109.747	95.6044	96.6587		99.8119	2.54725		88.9685	101.814	93.0902	91.0243	93.5484		93.6891	2.18837		93.0931	93.0931	94.6463	93.6102	94.1176		93.7121	0.301154		88.9213	98.1352	88.3847	95.2183	95.2381		93.1795	1.92452		91.2333	91.6084	92.3211	89.4791	90.3308		90.9945	0.496531		84.6154	90.8163	87.8613
366.837		99.0777	98.2673	108.967	95.4823	102.148		100.788	2.30405		97.4212	104.762	91.7466	92.7138	93.1183		95.9524	2.40805		94.7447	94.7447	97.8967	93.7167	90.5882		94.3382	1.17137		93.0029	96.9697	90.5626	95.1144	93.7229		93.8745	1.06932		92.5706	94.4056	91.4485	84.5761	93.3842		91.277	1.74404		83.2025	88.0102	85.9345
368.825		100.395	95.7921	109.552	98.6569	99.5227		100.784	2.32442		95.5587	104.308	92.3225	91.2355	95.0538		95.6958	2.30089		96.5465	96.5465	98.2792	94.2492	96.9412		96.5125	0.649219		90.0875	98.8345	95.0998	96.9855	96.9697		95.5954	1.49826		95.3938	95.338	94.4154	88.049	93.1298		93.2652	1.36706		83.6735	89.2857	89.788
370.819		99.7365	100	106.628	96.2149	101.671		100.85	1.69561		94.9857	101.587	99.2322	88.3844	98.7097		96.5799	2.30601		93.8438	93.8438	96.1759	91.6933	91.2941		93.3702	0.878715		88.484	92.3077	91.1071	96.8815	98.2684		93.4097	1.82263		93.6107	90.676	91.623	88.2533	94.402		91.713	1.09282		85.2433	87.7551	88.2466
372.806		99.8683	94.5545	110.331	93.1624	100.716		99.7265	3.02738		93.1232	100.907	91.9386	93.6642	92.043		94.3352	1.6749		96.5465	96.5465	96.7495	92.1193	92.2353		94.8394	1.08761		90.2332	93.7063	91.6515	98.6487	96.9697		94.2419	1.57998		96.2853	88.8112	92.3211	87.8447	90.5852		91.1695	1.49088		84.1444	88.5204	88.632
374.797		96.3109	99.5049	104.873	94.0171	101.432		99.2277	1.9035		91.5473	104.308	96.5451	93.8754	96.5591		96.5671	2.14909		96.997	96.997	96.9407	93.8232	90.3529		95.0222	1.31757		88.6297	97.9021	90.7441	96.8815	94.8052		93.7925	1.78049		94.3536	90.676	90.7504	85.4954	94.9109		91.2373	1.68417		83.9874	89.7959	88.2466
376.785		97.892	96.0396	115.01	100	98.8067		101.55	3.42664		93.9828	104.082	95.5854	91.9747	92.043		95.5335	2.23971		98.1982	98.1982	94.8375	93.6102	92.4706		95.4629	1.17774		85.8601	91.6084	90.3811	96.6736	97.4026		92.3852	2.13028		91.2333	91.8415	91.9721	85.6997	95.4198		91.2333	1.56627		84.6154	89.5408	84.7784
378.783		96.0474	94.802	106.238	94.2613	100.716		98.4129	2.26278		94.2693	104.989	95.7773	91.1299	94.6237		96.1578	2.33805		95.0451	95.0451	94.2639	93.2907	95.2941		94.5878	0.367721		89.0671	97.669	87.6588	95.4262	96.3204		93.2283	2.03035		90.6389	89.2774	93.5428	87.7426	92.6209		90.7645	1.06123		86.9702	84.4388	87.4759
380.772		99.473	96.5346	115.01	92.4298	98.568		100.403	3.84788		93.9828	102.041	91.7466	91.7635	91.828		94.2723	1.98848		94.5946	94.5946	95.9847	94.1427	92.9412		94.4516	0.488266		91.691	96.9697	91.6515	96.6736	97.1861		94.8344	1.29392		91.5305	92.3077	92.6702	86.3126	89.5674		90.4777	1.17135		84.4584	89.2857	85.3564
382.764		98.946	98.7624	107.407	98.779	97.6134		100.302	1.79226		94.5559	99.5465	92.3225	91.1299	88.6021		93.2314	1.84807		96.8469	96.8469	94.6463	91.2673	95.5294		95.0273	1.0285		89.0671	100.699	89.2922	96.4657	95.671		94.2391	2.23567		93.0163	90.2098	91.0995	87.1297	89.313		90.1537	0.973232		86.3422	84.1837	88.632
384.752		97.892	99.0099	103.509	96.2149	99.284		99.1819	1.20891		91.8338	102.494	94.4338	91.1299	91.6129		94.3009	2.1274		96.0961	96.0961	95.0287	95.8466	92.9412		95.2017	0.598153		91.8367	97.2028	87.1143	98.025	98.7013		94.576	2.22479		94.0565	91.6084	93.1937	89.1726	92.3664		92.0795	0.833787		82.8885	87.5	89.9807
386.747		100.132	100.248	104.288	98.1685	104.773		101.522	1.28506		92.1203	102.041	94.0499	91.0243	91.3979		94.1266	2.04617		95.4955	95.4955	93.3078	93.0777	94.5882		94.393	0.518489		91.8367	97.4359	91.6515	94.1788	99.1342		94.8474	1.49669		90.1932	89.9767	92.4956	85.2911	93.8931		90.3699	1.46478		82.8885	86.4796	87.0906
388.736		98.8142	99.5049	110.136	94.5055	100.477		100.688	2.57345		91.5473	104.308	91.9386	89.3347	92.2581		93.8774	2.65756		94.8949	94.8949	93.1166	95.7401	94.3529		94.5999	0.432162		91.5452	94.8718	88.2033	94.9064	96.7532		93.256	1.51694		94.0565	95.5711	91.9721	88.2533	89.8219		91.935	1.33685		85.7143	85.2041	89.21
390.729		96.0474	97.7723	107.407	95.4823	101.909		99.7237	2.2263		92.8367	100.454	90.595	87.1172	96.5591		93.5123	2.31655		96.997	96.997	94.4551	91.4803	92		94.3859	1.17846		90.2332	97.4359	88.9292	97.7131	95.8875		94.0398	1.85807		93.3135	94.4056	92.8447	86.9254	93.6387		92.2256	1.34922		86.4992	87.5	85.7418
392.717		97.6285	99.0099	109.747	97.3138	103.58		101.456	2.35623		90.5444	100.68	95.5854	92.7138	91.828		94.2704	1.80399		93.994	93.994	100.382	96.8051	94.5882		95.9527	1.22237		87.3178	96.9697	88.9292	95.5302	96.5368		93.0567	2.04343		93.9079	93.007	93.0192	87.8447	91.0941		91.7746	1.08456		82.5746	88.0102	90.7515
394.713		99.8683	102.228	111.501	99.8779	97.6134		102.218	2.43284		92.1203	102.268	91.7466	92.0803	94.4086		94.5247	1.99299		93.2432	93.2432	94.2639	94.5687	94.1176		93.8873	0.272835		89.9417	95.8042	89.8367	95.5302	95.0216		93.2269	1.36848		89.5988	94.6387	89.7033	86.5169	90.3308		90.1577	1.30161		84.6154	89.7959	86.3199
396.704		98.5507	94.802	105.653	97.1917	99.7613		99.1917	1.81319		94.1261	100.68	90.9789	86.5892	98.4946		94.1738	2.53712		94.8949	94.8949	95.4111	93.0777	90.1176		93.6793	0.974721		88.3382	96.2704	88.7477	95.0104	96.3204		92.9374	1.81048		92.422	89.7436	95.4625	88.3555	94.402		92.0771	1.34687		84.9294	85.2041	84.7784
398.701		95.1252	100.495	107.797	97.6801	105.489		101.317	2.36267		95.702	104.308	95.2015	92.5026	94.1936		96.3816	2.05575		93.2432	93.2432	94.4551	93.9297	94.8235		93.939	0.317567		89.6501	94.1725	86.3884	97.6091	94.8052		92.5251	1.99606		91.5305	93.9394	91.4485	88.049	89.0585		90.8052	1.03466		83.0455	84.4388	88.8247
400.69		96.1792	96.7822	109.552	96.7033	99.0453		99.6523	2.52352		94.1261	96.8254	90.2111	90.8131	95.6989		93.5349	1.30988		97.1471	97.1471	93.3078	94.9947	92.4706		95.0135	0.961274		90.379	96.2704	89.1107	95.6341	96.3204		93.5429	1.56814		91.5305	95.5711	91.4485	87.334	91.3486		91.4465	1.30272		86.6562	83.1633	87.8613
402.685		97.4967	100	100.585	94.9939	101.193		98.8537	1.15161		93.9828	103.175	97.5048	91.6579	96.129		96.4898	1.94267		96.6967	96.6967	96.7495	95.3142	93.8824		95.8679	0.56569		93.4402	95.1049	90.3811	97.0894	95.2381		94.2508	1.12679		93.4621	89.7436	89.5288	86.1083	89.5674		89.682	1.16407		83.8305	86.4796	87.6686
404.675		98.8142	102.228	100.975	99.1453	96.6587		99.5641	0.955603		94.1261	101.361	93.666	92.7138	97.2043		95.8141	1.57751		97.1471	97.1471	95.9847	92.2258	94.3529		95.3715	0.938482		87.7551	94.4056	88.5662	96.4657	93.9394		92.2264	1.7182		90.0446	93.9394	93.0192	87.8447	89.5674		90.8831	1.1307		84.1444	87.2449	85.9345
406.67		101.844	98.5148	107.407	94.8718	101.193		100.766	2.06474		92.5501	101.134	92.3225	91.7635	97.4193		95.0378	1.83188		92.1922	92.1922	95.6023	91.5868	88.2353		91.9618	1.17019		89.5044	97.2028	85.8439	98.6487	95.2381		93.2876	2.42482		88.4101	93.007	87.9581	91.3177	88.8041		89.8994	0.970951		79.1209	87.7551	84.9711
408.661		95.7839	98.5148	100.195	94.8718	99.0453		97.6822	1.00913		94.6991	102.041	90.787	92.0803	96.7742		95.2763	1.98374		91.2913	91.2913	95.0287	91.6933	92.2353		92.308	0.701878		90.8163	98.1352	87.1143	96.5696	94.8052		93.4881	2.00735		94.948	91.6084	93.5428	86.8233	89.5674		91.298	1.44006		83.2025	86.4796	83.4297
410.657		99.0777	97.2772	105.068	98.2906	98.568		99.6564	1.38443		93.2665	103.855	91.5547	94.1922	89.0323		94.3801	2.52616		95.9459	95.9459	93.6903	94.8882	93.1765		94.7294	0.569062		91.691	97.9021	94.1924	98.6487	95.0216		95.4911	1.2675		92.1248	90.9091	92.3211	85.2911	91.3486		90.3989	1.30241		85.2433	90.051	86.7052
412.646		98.8142	96.2871	99.2203	93.7729	98.568		97.3325	1.0259		91.6905	98.4127	92.7063	92.5026	92.043		93.471	1.24804		94.5946	94.5946	91.587	91.4803	93.1765		93.0866	0.685024		90.0875	93.4732	89.4737	96.3618	99.3507		93.7493	1.87038		88.4101	94.1725	91.623	87.334	89.0585		90.1196	1.23479		84.3014	84.949	84.3931
414.639		99.2095	97.7723	102.534	94.5055	98.8067		98.5656	1.29104		95.2722	99.3197	92.7063	91.5523	88.6021		93.4905	1.80862		96.0961	96.0961	93.3078	91.6933	95.0588		94.4504	0.857144		86.7347	97.2028	87.2958	96.2578	94.5887		92.416	2.24596		91.8276	89.9767	92.3211	82.7375	88.5496		89.0825	1.72289		83.3595	85.9694	85.1638
416.629		99.6047	96.0396	102.534	92.674	99.284		98.0273	1.68801		92.5501	102.721	91.9386	91.4467	98.2796		95.3872	2.20932		92.4925	92.4925	92.9254	93.9297	93.4118		93.0504	0.277661		89.3586	93.9394	88.9292	94.4906	93.9394		92.1314	1.22568		91.0847	93.007	90.7504	87.1297	89.0585		90.2061	0.992328		82.4176	88.7755	86.8979
418.625		97.892	97.7723	99.6101	95.7265	96.6587		97.5319	0.65301		90.831	100	91.9386	87.7508	99.5699		94.018	2.45323		94.7447	94.7447	94.6463	91.6933	92.9412		93.754	0.619132		89.9417	95.338	91.6515	93.4511	97.1861		93.5137	1.28541		91.3819	90.4429	91.623	88.4576	90.0763		90.3964	0.562997		85.5573	86.7347	85.1638
420.614		95.9157	95.5446	100.975	94.6276	96.8974		96.792	1.10713		92.8367	98.8662	93.2822	93.981	90.1075		93.8147	1.42353		96.0961	96.0961	95.0287	94.8882	94.5882		95.3395	0.316984		84.9854	98.1352	84.392	96.2578	97.6191		92.2779	3.11483		89.7474	93.2401	91.0995	87.4362	85.4962		89.4039	1.35742		85.8713	89.5408	88.2466
422.607		98.419	95.7921	103.899	93.6508	96.1814		97.5884	1.74957		92.1203	100.454	91.5547	88.2788	91.3979		92.761	2.03702		91.8919	91.8919	96.3671	93.9297	93.6471		93.5455	0.824265		90.2332	96.2704	92.3775	95.0104	98.052		94.3887	1.39031		90.9361	91.3753	90.5759	87.9469	91.8575		90.5383	0.682495		84.6154	87.5	88.632
424.596		99.2095	96.5346	101.17	92.7961	97.136		97.3692	1.40524		90.5444	98.6395	92.7063	92.1859	89.6774		92.7507	1.57021		92.6426	92.6426	91.9694	95.9531	94.8235		93.6063	0.759144		90.2332	95.8042	90.7441	95.5302	95.8875		93.6398	1.29034		89.4502	93.7063	90.925	84.8825	89.0585		89.6045	1.43505		84.3014	88.5204	85.1638
426.592		97.892	98.7624	102.729	94.5055	98.0907		98.3959	1.31134		89.8281	102.721	92.5144	88.0676	87.957		92.2176	2.75224		94.7447	94.7447	96.5583	92.3323	93.4118		94.3584	0.712022		89.6501	96.9697	85.2995	96.2578	97.8355		93.2025	2.45019		88.7073	93.4732	89.7033	87.1297	93.1298		90.4287	1.24373		84.1444	90.051	83.4297
428.581		97.892	99.0099	98.4406	95.3602	97.136		97.5677	0.632706		88.3954	102.041	91.3628	91.0243	95.4839		93.6614	2.38227		92.4925	92.4925	96.7495	92.4388	92.9412		93.4229	0.83661		85.7143	95.338	88.9292	91.2682	96.1039		91.4707	1.95011		92.7192	93.2401	93.1937	85.0868	92.112		91.2704	1.55921		84.3014	88.0102	82.8516
430.575		95.9157	97.2772	102.729	97.4359	97.852		98.242	1.16785		92.1203	100	92.7063	89.3347	90.5376		92.9398	1.86198		94.5946	94.5946	95.9847	92.3323	93.4118		94.1836	0.616642		91.1079	95.1049	88.3847	94.6985	97.4026		93.3397	1.59691		95.2452	91.3753	90.7504	88.4576	87.0229		90.5703	1.40681		82.8885	84.6939	83.815
432.564		98.1555	94.0594	97.6608	94.2613	98.568		96.541	0.982972		90.831	97.2789	91.3628	89.8627	92.043		92.2757	1.30057		98.4985	98.4985	91.9694	91.5868	94.8235		95.0753	1.50526		87.3178	97.669	90.0182	94.5946	96.3204		93.184	1.95419		93.1649	90.9091	89.0052	86.619	86.0051		89.1407	1.33287		84.3014	86.4796	86.3199
434.56		94.7299	100.743	97.076	94.9939	100.239		97.5562	1.26753		91.1175	102.268	94.8177	93.0306	90.1075		94.2682	2.15711		92.6426	92.6426	97.7055	93.8232	92.4706		93.8569	0.992065		88.484	96.5035	88.9292	95.1144	92.4242		92.2911	1.60514		94.3536	93.2401	95.8115	84.5761	92.6209		92.1204	1.96255		81.7896	85.7143	88.8247
436.548		94.4664	96.0396	104.483	92.7961	100.716		97.7003	2.1491		90.9742	101.587	91.9386	91.9747	90.3226		93.3595	2.08022		93.3934	93.3934	95.6023	91.6933	95.0588		93.8282	0.69274		90.6706	96.9697	86.9329	95.7381	97.1861		93.4995	2.02199		91.3819	95.1049	91.9721	82.9418	91.0941		90.499	2.02027		83.0455	86.2245	88.2466
438.542		94.8617	95.297	97.8558	96.337	97.852		96.4407	0.624753		92.8367	101.587	90.9789	89.5459	96.129		94.2156	2.14694		93.3934	93.3934	95.9847	93.1842	93.4118		93.8735	0.529455		90.8163	94.6387	87.4773	96.6736	100		93.9212	2.19324		93.1649	90.676	90.0524	89.1726	90.8397		90.7811	0.663904		83.5165	88.2653	89.5954
440.531		94.5982	98.0198	102.144	96.9475	96.8974		97.7214	1.2386		93.553	97.0521	91.7466	90.9187	89.4624		92.5466	1.30605		93.2432	93.2432	91.9694	92.1193	93.6471		92.8444	0.335695		87.6093	100	89.6552	97.817	97.8355		94.5834	2.48291		91.0847	91.1422	89.1798	85.189	88.8041		89.0799	1.08392		85.0863	87.5	84.9711
442.523		94.9934	95.7921	102.144	93.6508	95.2267		96.3614	1.4878		93.553	98.4127	92.7063	90.6019	88.172		92.6892	1.70685		94.2943	94.2943	95.6023	91.7998	93.6471		93.9275	0.619669		89.0671	94.6387	89.1107	94.1788	99.7836		93.3558	2.00066		89.7474	86.9464	88.4817	88.2533	89.313		88.5484	0.483743		81.3187	88.7755	85.7418
444.51		98.5507	96.0396	102.924	94.3834	99.0453		98.1886	1.4558		92.5501	100.227	92.1305	89.7571	93.1183		93.5566	1.76304		94.8949	94.8949	95.9847	92.8648	91.0588		93.9396	0.879255		88.3382	97.4359	86.5699	96.7776	95.0216		92.8286	2.24685		91.5305	91.8415	90.2269	86.4147	92.8753		90.5778	1.12333		81.6326	84.949	83.237
446.507		100.132	93.0693	100	95.9707	100		97.8344	1.42894		93.9828	99.5465	91.7466	92.925	86.6667		92.9735	2.06769		93.2432	93.2432	93.3078	92.9712	90.5882		92.6708	0.523857		88.0466	94.8718	85.4809	95.842	94.8052		91.8093	2.1074		89.153	91.8415	90.925	88.3555	90.8397		90.2229	0.63738		84.6154	86.2245	85.9345
448.498		96.3109	96.0396	105.653	93.5287	98.568		98.02	2.06855		91.9771	101.814	91.5547	89.7571	86.0215		92.2249	2.61759		94.5946	94.5946	93.3078	95.1012	91.7647		93.8726	0.604735		89.2128	99.5338	92.0145	98.7526	94.8052		94.8638	1.96198		89.0045	89.9767	89.5288	90.3984	90.8397		89.9496	0.321306		81.7896	87.2449	81.5029
450.49		95.9157	94.0594	100.195	96.5812	99.7613		97.3025	1.16989		91.9771	98.6395	92.8983	90.2851	88.6021		92.4804	1.7062		91.5916	91.5916	94.6463	92.7583	91.5294		92.4234	0.601511		88.9213	95.338	90.3811	98.2328	97.4026		94.0552	1.87296		92.2734	91.8415	88.6562	88.8662	90.5852		90.4445	0.7418		81.0047	82.9082	84.2004
452.476		99.6047	98.2673	102.729	91.5751	100.239		98.483	1.87263		91.6905	100.227	91.5547	91.8691	89.2473		92.9177	1.88889		98.9489	98.9489	97.3231	92.7583	97.6471		97.1253	1.14092		88.0466	95.338	89.1107	97.4013	96.3204		93.2434	1.93943		90.3418	87.8788	90.2269	86.3126	90.8397		89.1199	0.868836		83.6735	90.8163	85.3564
454.473		99.473	100.495	100.585	91.8193	97.136		97.9016	1.64279		90.6877	104.082	92.3225	88.5956	85.1613		92.1697	3.2094		93.5435	93.5435	94.8375	94.7817	97.4118		94.8236	0.706315		89.3586	96.2704	89.4737	96.5696	94.8052		93.2955	1.61175		91.0847	88.8112	92.6702	84.3718	90.8397		89.5555	1.43376		84.4584	89.0306	80.9249
456.461		97.2332	98.0198	102.144	95.7265	100		98.6247	1.11759		90.9742	103.628	93.0902	92.925	87.3118		93.5859	2.71766		96.2463	96.2463	94.8375	91.2673	92		94.1195	1.0533		91.2536	95.1049	88.7477	95.3222	96.3204		93.3498	1.43819		93.4621	89.5105	93.0192	86.2104	88.0407		90.0486	1.40587		81.9466	86.7347	85.5491
458.455		100.527	96.5346	100.39	96.0928	93.3174		97.3724	1.37548		92.4069	101.134	89.4434	91.3411	88.8172		92.6285	2.22169		95.6457	95.6457	96.1759	93.5037	92.2353		94.6412	0.756816		87.3178	96.5035	88.7477	98.8565	91.9913		92.6834	2.20748		94.5022	92.0746	89.7033	87.4362	91.8575		91.1148	1.19315		80.8477	88.2653	82.4663
460.447		98.1555	97.2772	107.017	95.3602	99.284		99.4189	2.00516		89.9714	99.5465	92.8983	89.1235	88.8172		92.0714	2.00313		93.994	93.994	94.2639	89.8829	92		92.8269	0.84084		90.6706	95.1049	83.6661	95.0104	95.2381		91.938	2.24043		89.5988	92.5408	85.5148	86.619	88.8041		88.6155	1.22496		83.2025	87.2449	85.9345
462.446		100.527	96.0396	98.4406	95.2381	98.568		97.7627	0.951106		91.5473	100.227	94.6257	92.5026	91.3979		94.0601	1.64584		97.2973	97.2973	93.8815	90.8413	91.2941		94.1223	1.39611		88.3382	95.338	88.3847	96.3618	97.4026		93.1651	1.98806		92.422	96.0373	91.623	84.7804	90.0763		90.9878	1.83467		82.8885	86.7347	86.3199
464.436		101.713	97.0297	102.534	95.2381	100.955		99.4939	1.42275		88.1089	101.134	91.7466	90.8131	90.1075		92.382	2.26817		96.2463	96.2463	98.4704	89.4569	88		93.6839	2.07625		91.691	95.338	90.1996	96.2578	95.0216		93.7016	1.1675		91.9762	89.7436	88.4817	84.7804	85.2417		88.0447	1.361		80.8477	84.4388	83.237
466.431		101.581	95.7921	96.6862	95.8486	96.6587		97.3133	1.08385		92.1203	100.68	93.2822	92.1859	86.2366		92.901	2.30433		93.994	93.994	95.6023	90.5218	91.0588		93.0342	0.965702		89.9417	95.338	90.9256	98.1289	95.8875		94.0443	1.55423		92.8678	91.1422	90.5759	85.5975	91.603		90.3573	1.24847		82.5746	86.2245	85.5491
468.423		97.6285	96.2871	109.942	94.6276	95.4654		98.79	2.8315		92.9799	100.454	91.9386	92.0803	91.828		93.856	1.66188		95.7958	95.7958	96.7495	91.3738	93.1765		94.5783	0.997817		87.0262	96.9697	86.9329	95.3222	95.0216		92.2545	2.17894		93.3135	91.3753	90.925	86.619	87.5318		89.9529	1.24977		84.1444	83.9286	85.1638
470.424		95.9157	96.0396	102.339	96.0928	94.7494		97.0273	1.35073		95.1289	100.227	92.8983	92.925	90.5376		94.3433	1.64036		95.7958	95.7958	93.6903	92.9712	93.6471		94.38	0.591883		89.3586	94.6387	90.3811	96.6736	95.2381		93.258	1.43135		89.153	90.4429	90.0524	88.2533	88.2952		89.2394	0.446132		82.2606	85.4592	84.7784
472.411		95.5204	95.0495	101.949	92.3077	98.568		96.679	1.65001		88.682	102.948	90.9789	88.8068	90.3226		92.3476	2.68619		93.3934	93.3934	93.1166	93.7167	88.4706		92.4181	0.991453		91.3994	96.7366	86.7514	95.0104	98.4848		93.6765	2.09053		91.5305	90.676	92.3211	87.5383	85.4962		89.5124	1.29117		81.7896	88.2653	85.3564
474.407		96.8379	97.0297	99.4152	95.3602	94.9881		96.7262	0.781741		92.2636	103.855	90.595	89.6515	89.8925		93.2515	2.68987		95.3453	95.3453	97.3231	92.3323	92.4706		94.5633	0.953857		88.1924	98.6014	88.5662	94.4906	97.8355		93.5372	2.21707		88.2615	89.5105	89.0052	84.0654	86.514		87.4713	0.991275		83.3595	86.7347	88.2466
476.393		96.7062	98.2673	103.314	94.8718	96.1814		97.8681	1.46608		88.3954	103.175	91.5547	89.3347	87.0968		91.9112	2.90834		96.997	96.997	94.0727	91.3738	91.2941		94.1469	1.26649		89.3586	93.7063	93.4664	91.7879	94.8052		92.6249	0.948695		92.2734	93.9394	90.4014	88.1512	89.0585		90.7648	1.05424		82.4176	83.4184	85.3564
478.39		96.3109	94.5545	97.6608	96.5812	98.8067		96.7828	0.710486		92.4069	101.814	92.3225	90.6019	85.5914		92.5473	2.62786		94.8949	94.8949	95.7935	91.3738	89.1765		93.2267	1.26475		89.5044	97.2028	88.3847	95.2183	96.5368		93.3694	1.84297		89.7474	91.1422	87.26	84.5761	88.5496		88.2551	1.12192		81.4757	87.2449	84.3931
480.384		95.9157	98.2673	106.823	94.1392	93.7947		97.7879	2.39394		91.8338	103.175	91.1708	92.925	93.5484		94.5305	2.20025		95.0451	95.0451	96.3671	89.8829	93.1765		93.9033	1.12627		88.9213	90.9091	91.6515	97.4013	99.7836		93.7333	2.06791		90.3418	95.8042	93.3682	87.5383	89.313		91.2731	1.47612		79.2779	84.1837	86.5125
482.379		97.6285	98.7624	103.119	93.7729	97.3747		98.1315	1.50159		90.831	98.4127	92.1305	91.4467	88.3871		92.2416	1.66694		94.1441	94.1441	96.9407	92.8648	94.3529		94.4893	0.667291		88.9213	94.6387	88.3847	97.0894	95.0216		92.8112	1.75005		89.3016	90.4429	91.274	86.3126	89.0585		89.2779	0.842127		82.4176	84.949	81.6956
484.37		98.6825	96.7822	105.848	96.8254	99.5227		99.5321	1.66585		94.1261	102.721	91.1708	88.7012	98.7097		95.0858	2.53419		95.1952	95.1952	91.9694	92.1193	90.8235		93.0605	0.899842		87.172	96.9697	89.4737	95.7381	96.7532		93.2213	2.04325		91.0847	92.0746	94.2408	83.5546	90.5852		90.308	1.80105		82.4176	83.6735	81.3102
486.364		100.79	96.5346	101.949	93.6508	99.0453		98.3941	1.49604		87.3925	100	92.8983	89.8627	89.8925		92.0092	2.17996		93.994	93.994	94.8375	92.6518	91.7647		93.4484	0.547464		87.7551	99.3007	85.118	94.8025	92.6407		91.9234	2.5191		89.0045	90.9091	90.2269	85.4954	91.603		89.4478	1.07716		81.9466	87.5	83.815
488.354		96.7062	100.248	100	91.5751	98.0907		97.3239	1.57682		91.9771	102.494	91.3628	91.1299	90.5376		93.5003	2.26028		96.3964	96.3964	94.6463	92.0128	89.4118		93.7727	1.35362		89.0671	96.9697	91.833	94.4906	94.3723		93.3465	1.34337		90.7875	92.5408	87.4346	85.904	88.2952		88.9924	1.1888		82.4176	86.9898	85.3564
490.349		97.1014	99.2574	101.17	96.4591	96.4201		98.0815	0.929308		89.255	104.082	88.6756	90.8131	91.3979		92.8446	2.85268		93.0931	93.0931	92.3518	88.8179	91.2941		91.73	0.799158		85.4227	97.2028	88.9292	96.8815	96.9697		93.0812	2.47428		87.37	94.1725	91.274	88.5597	89.0585		90.087	1.20151		78.9639	85.9694	84.5857
492.338		99.0777	101.733	101.949	97.0696	100.477		100.061	0.906886		91.8338	99.093	93.858	93.2418	88.172		93.2397	1.76495		93.994	93.994	95.2199	92.7583	90.8235		93.3579	0.743601		88.1924	90.4429	89.2922	94.3867	95.8875		91.6403	1.49024		88.4101	90.676	85.1658	85.6997	88.0407		87.5985	0.996211		80.2198	87.7551	85.3564
494.336		97.6285	96.7822	102.339	93.7729	97.852		97.675	1.37499		90.5444	102.948	90.9789	91.4467	88.3871		92.861	2.57554		95.4955	95.4955	95.4111	90.9478	92.4706		93.9641	0.951648		88.7755	96.0373	88.5662	95.5302	91.9913		92.1801	1.59354		90.3418	92.5408	90.2269	84.1675	87.7863		89.0126	1.42597		83.6735	82.1429	84.0077
496.323		101.186	97.0297	97.271	92.9182	100.477		97.7764	1.47197		91.1175	100	93.4741	91.1299	90.3226		93.2088	1.77787		93.994	93.994	95.9847	91.1608	93.8824		93.8032	0.768773		87.0262	97.4359	89.4737	95.9459	98.2684		93.63	2.26106		88.8559	90.676	87.26	87.334	86.514		88.128	0.741986		78.3359	85.2041	80.7322
498.317		97.4967	99.0099	100.975	94.6276	98.0907		98.0399	1.03671		89.3983	99.5465	94.0499	91.7635	87.0968		92.371	2.13694		91.5916	91.5916	94.4551	90.0958	91.5294		91.8527	0.710624		86.8805	95.8042	87.2958	95.842	94.8052		92.1255	2.06594		89.153	92.3077	91.274	85.3933	88.5496		89.3355	1.19966		77.237	84.4388	82.659
500.307		97.7602	99.0099	99.6101	94.2613	95.4654		97.2214	1.02569		88.3954	101.361	91.9386	93.0306	88.8172		92.7085	2.33772		94.4444	94.4444	95.2199	94.0362	92		94.029	0.542231		86.4432	94.8718	88.5662	97.817	96.3204		92.8037	2.23819		93.9079	90.9091	87.7836	86.1083	87.2773		89.1972	1.42033		82.7315	86.9898	84.7784
502.3		94.7299	95.7921	101.365	94.7497	97.852		96.8976	1.25297		88.9685	102.041	91.3628	92.925	88.172		92.6938	2.48511		96.8469	96.8469	93.3078	90.9478	90.5882		93.7075	1.36412		85.8601	93.007	85.4809	95.4262	96.1039		91.1756	2.30645		93.1649	89.0443	88.8307	87.334	88.0407		89.2829	1.01668		78.8069	92.0918	84.7784
504.286		96.5744	94.3069	102.729	94.3834	96.1814		96.835	1.54331		92.6934	102.948	94.2418	89.1235	87.957		93.3927	2.64842		93.2432	93.2432	91.3958	90.6283	86.3529		90.9727	1.26393		89.2128	93.2401	90.1996	95.4262	97.8355		93.1829	1.60224		90.3418	93.7063	90.925	84.7804	87.7863		89.5079	1.51068		81.3187	82.1429	85.3564
506.28		96.7062	95.297	100.975	98.2906	99.5227		98.1582	1.00266		90.2579	101.587	92.5144	88.5956	88.172		92.2254	2.46176		94.1441	94.1441	97.1319	90.9478	90.3529		93.3442	1.2312		88.3382	95.8042	87.8403	98.6487	98.9177		93.9098	2.43933		90.9361	88.5781	91.4485	84.0654	89.5674		88.9191	1.31456		80.6907	84.1837	85.3564
508.264		95.6522	99.0099	101.17	92.9182	95.4654		96.8431	1.45146		90.6877	102.041	91.9386	92.397	91.828		93.7784	2.08467		92.1922	92.1922	96.1759	95.4207	89.4118		93.0785	1.2267		83.8192	95.338	92.196	96.0499	95.4545		92.5715	2.28919		87.8157	92.7739	90.925	86.8233	89.5674		89.5811	1.06588		82.2606	87.2449	82.2736
510.256		95.7839	97.7723	105.653	95.2381	98.0907		98.5076	1.86921		90.4012	100.227	92.5144	92.6082	87.7419		92.6985	2.08042		92.3423	92.3423	93.1166	91.6933	90.1176		91.9224	0.504406		90.0875	98.3683	86.7514	94.1788	94.1558		92.7084	1.98302		92.1248	88.1119	86.0384	85.2911	89.5674		88.2267	1.23313		78.8069	83.9286	86.3199
512.243		94.7299	99.5049	101.754	94.9939	96.1814		97.4329	1.37459		90.2579	100.227	94.4338	89.3347	89.8925		92.8291	2.05848		92.042	92.042	95.6023	92.5453	90.5882		92.564	0.827045		84.4023	93.007	86.3884	98.6487	96.7532		91.8399	2.80088		87.9643	93.2401	88.8307	88.3555	90.8397		89.8461	0.982355		81.3187	82.6531	80.9249
514.238		96.1792	98.7624	100.39	92.4298	97.136		96.9795	1.34489		91.5473	100.68	96.3532	92.925	96.3441		95.57	1.58912		92.1922	92.1922	93.6903	92.0128	91.0588		92.2292	0.421547		86.8805	96.5035	88.2033	100.936	91.9913		92.9028	2.61415		87.8157	89.9767	87.7836	85.0868	86.0051		87.3336	0.843619		82.5746	86.9898	83.6223
516.226		95.5204	94.802	99.8051	94.1392	96.8974		96.2328	1.00351		91.5473	100.454	90.4031	91.6579	90.7527		92.9629	1.88751		95.1952	95.1952	95.9847	87.8594	91.2941		93.1057	1.54638		87.6093	97.669	86.3884	96.3618	95.0216		92.61	2.33667		88.1129	91.1422	87.0855	85.904	88.0407		88.0571	0.868938		81.7896	86.7347	87.8613
518.218		96.7062	96.2871	102.729	93.6508	98.568		97.5882	1.50602		88.9685	101.134	92.5144	92.1859	90.9677		93.1541	2.08952		91.5916	91.5916	94.6463	92.3323	90.3529		92.1029	0.710865		89.5044	95.5711	88.5662	97.7131	100.649		94.4008	2.33884		87.5186	92.5408	91.274	86.619	86.514		88.8933	1.25888		79.4348	85.2041	84.2004
520.205		97.2332	98.2673	98.8304	92.0635	96.8974		96.6584	1.20015		94.1261	102.494	92.1305	91.7635	95.4839		95.1996	1.94515		94.4444	94.4444	95.7935	90.6283	95.0588		94.0739	0.896483		90.2332	100.466	84.5735	95.842	93.5065		92.9243	2.67123		88.4101	91.3753	89.7033	86.3126	90.5852		89.2773	0.889817		82.7315	86.9898	82.4663
522.2		100.527	93.8119	109.357	96.0928	95.7041		99.0985	2.79084		91.5473	100.454	88.6756	91.0243	86.2366		91.5875	2.4087		94.4444	94.4444	96.9407	94.7817	91.5294		94.4281	0.861431		87.6093	93.007	86.2069	96.7776	93.29		91.3782	1.95458		89.4502	91.3753	88.6562	89.1726	93.3842		90.4077	0.874809		81.6326	84.1837	80.5395
524.188		96.3109	96.0396	102.144	94.6276	95.4654		96.9175	1.33808		89.255	97.9592	91.3628	89.8627	89.0323		91.4944	1.66658		94.4444	94.4444	97.3231	91.6933	92.2353		94.0281	0.996731		87.6093	94.1725	87.4773	98.2328	98.2684		93.1521	2.40788		88.8559	88.345	92.6702	88.8662	89.0585		89.5591	0.786702		82.2606	83.4184	82.0809
526.183		98.6825	94.3069	107.017	93.0403	101.432		98.8958	2.52769		90.831	101.361	92.8983	91.1299	84.7312		92.1902	2.67586		97.4475	97.4475	96.3671	91.7998	92		95.0124	1.28627		92.4198	95.338	86.5699	97.2973	95.4545		93.4159	1.88117		88.8559	92.5408	87.9581	83.4525	91.3486		88.8312	1.57784		81.9466	88.2653	81.6956
528.171		98.0237	95.7921	99.6101	95.8486	96.6587		97.1867	0.727596		93.553	101.361	90.595	91.9747	90.9677		93.6902	1.98478		93.0931	93.0931	91.0134	92.4388	91.0588		92.1394	0.46606		87.7551	96.9697	87.1143	94.6985	94.8052		92.2686	2.01714		89.896	90.9091	87.7836	83.5546	87.7863		87.9859	1.26314		79.9058	84.1837	83.6223
530.166		100	97.5247	101.754	94.0171	98.568		98.3729	1.30024		91.5473	99.7732	94.6257	91.2355	88.3871		93.1138	1.93595		94.2943	94.2943	96.9407	92.5453	92.9412		94.2032	0.769809		85.8601	93.7063	86.7514	97.7131	97.6191		92.33	2.56737		88.8559	88.8112	90.5759	85.904	88.0407		88.4375	0.757089		80.2198	89.0306	84.9711
532.152		98.8142	98.0198	105.653	94.3834	101.193		99.6127	1.86419		89.1118	100.68	92.7063	91.1299	86.6667		92.059	2.38089		88.7387	88.7387	94.2639	94.4622	92.4706		91.7348	1.2714		85.4227	94.6387	90.1996	93.5551	94.3723		91.6377	1.74433		89.4502	90.2098	88.3072	86.1083	87.0229		88.2197	0.754081		79.9058	90.5612	83.4297
534.149		99.3412	95.5446	103.704	93.1624	98.568		98.064	1.78976		88.5387	100.227	93.2822	89.7571	86.8817		91.7373	2.36841		92.6426	92.6426	97.3231	90.6283	87.5294		92.1532	1.59549		87.6093	94.6387	89.1107	100.832	96.9697		93.832	2.45461		87.5186	91.3753	87.6091	84.9847	87.5318		87.8039	1.02216		80.3768	85.2041	81.6956
536.139		98.0237	95.297	101.754	97.3138	93.3174		97.1413	1.4162		90.1146	99.7732	89.0595	90.7075	87.7419		91.4794	2.1339		94.4444	94.4444	94.4551	91.9063	92.9412		93.6383	0.522145		88.7755	94.8718	89.4737	95.6341	95.4545		92.8419	1.52681		89.0045	89.7436	84.9913	84.474	88.2952		87.3017	1.07665		79.9058	83.1633	84.2004
538.133		95.2569	94.3069	108.967	93.5287	92.8401		96.9799	3.02366		89.1118	99.093	91.1708	90.1795	84.9462		90.9003	2.3061		94.8949	94.8949	92.543	93.1842	88.7059		92.8446	1.13452		84.6939	95.1049	86.2069	99.5842	91.9913		91.5162	2.76523		89.0045	87.6457	90.7504	86.1083	90.5852		88.8188	0.883436		79.2779	86.9898	85.3564
540.12		100.263	95.297	106.043	92.1856	97.3747		98.2327	2.35632		93.2665	100.454	91.3628	89.1235	87.3118		92.3036	2.27226		92.1922	92.1922	92.3518	92.1193	92		92.1711	0.0572319		87.6093	93.9394	86.3884	96.4657	95.4545		91.9715	2.07848		86.0327	90.2098	90.0524	84.0654	86.514		87.3748	1.19794		79.2779	86.9898	82.8516
542.116		95.3887	96.5346	105.848	90.1099	95.7041		96.7171	2.54807		93.2665	101.361	93.4741	90.4963	89.6774		93.655	2.06588		96.3964	96.3964	90.2486	90.2023	93.8824		93.4252	1.38461		89.0671	95.338	84.9365	97.921	92.8571		92.0239	2.29595		88.1129	89.0443	88.6562	88.764	88.8041		88.6763	0.154472		79.7488	89.5408	79.7688
544.103		95.9157	96.2871	107.992	95.6044	93.7947		97.9188	2.55453		89.3983	96.8254	91.3628	92.1859	89.4624		91.8469	1.35677		94.2943	94.2943	94.0727	90.5218	92.2353		93.0837	0.748067		87.7551	92.0746	88.0218	98.1289	94.1558		92.0272	1.95011		89.7474	90.676	90.7504	86.5169	90.8397		89.7061	0.821261		79.7488	86.9898	84.9711
546.099		96.0474	94.5545	112.281	93.0403	92.1241		97.6094	3.72817		90.2579	97.0521	90.9789	88.0676	86.4516		90.5616	1.80978		92.3423	92.3423	92.1606	92.5453	89.6471		91.8075	0.543534		87.6093	93.4732	87.8403	97.6091	94.8052		92.2674	1.97136		90.3418	91.1422	88.1326	88.1512	88.5496		89.2635	0.621202		79.5918	88.0102	82.8516
548.087		97.7602	95.5446	104.873	95.7265	96.8974		98.1604	1.72605		89.5416	102.268	91.5547	87.7508	86.2366		91.4702	2.84197		95.6457	95.6457	93.3078	91.4803	91.5294		93.5218	0.927486		86.8805	95.8042	87.1143	99.7921	98.052		93.5286	2.74054		86.0327	88.5781	86.3874	86.5169	89.313		87.3656	0.660161		78.3359	86.7347	81.6956
550.079		94.5982	93.8119	103.704	95.116	94.7494		96.3958	1.83932		90.5444	103.628	90.595	90.8131	86.6667		92.4495	2.89956		93.6937	93.6937	94.2639	92.7583	91.5294		93.1878	0.479819		92.5656	94.1725	87.8403	97.2973	94.5887		93.2929	1.56122		91.3819	90.4429	86.5619	85.4954	89.0585		88.5881	1.12109		81.3187	82.6531	77.0713
552.069		98.0237	96.0396	96.2963	94.3834	98.0907		96.5667	0.691493		88.3954	101.134	86.9482	92.925	89.8925		91.859	2.52129		91.5916	91.5916	93.8815	91.5868	89.4118		91.6126	0.706857		88.7755	93.2401	90.0182	97.5052	90.6926		92.0463	1.54707		88.4101	92.0746	88.4817	83.5546	90.0763		88.5195	1.40935		80.5337	82.1429	87.0906
554.065		94.9934	95.5446	101.949	92.3077	95.7041		96.0998	1.58565		88.682	102.268	92.5144	90.2851	85.3763		91.8251	2.85796		94.8949	94.8949	93.6903	90.5218	92		93.2004	0.854349		84.6939	94.1725	88.3847	102.079	94.5887		92.7838	2.96973		91.2333	89.0443	86.3874	88.049	87.7863		88.5001	0.804451		78.022	82.9082	85.5491
556.054		94.7299	99.0099	97.076	92.5519	96.8974		96.053	1.10705		87.2493	99.5465	92.7063	93.453	87.7419		92.1394	2.23789		89.1892	89.1892	95.9847	92.1193	90.1176		91.32	1.28306		87.6093	93.9394	89.4737	99.2724	93.5065		92.7602	2.02099		89.4502	90.9091	88.4817	86.3126	85.7506		88.1808	0.962848		78.3359	81.6326	80.9249
558.049		97.4967	98.0198	99.4152	92.0635	99.284		97.2558	1.34867		87.8224	102.721	89.0595	90.6019	85.1613		91.0732	3.04524		90.5405	90.5405	91.7782	92.1193	89.1765		90.831	0.52264		87.9009	94.6387	88.5662	97.5052	94.1558		92.5534	1.85715		90.4903	91.1422	89.0052	86.1083	89.5674		89.2627	0.870321		80.0628	85.4592	84.5857
560.042		97.7602	95.5446	97.8558	93.0403	97.852		96.4106	0.951227		92.8367	101.814	91.5547	91.1299	85.3763		92.5423	2.64928		91.2913	91.2913	91.9694	90.8413	90.5882		91.1963	0.235743		91.1079	93.7063	85.6624	97.0894	94.8052		92.4742	1.956		91.3819	88.5781	89.0052	86.7211	89.5674		89.0508	0.753447		79.7488	85.2041	81.1175
562.037		96.1792	94.3069	108.577	93.2845	94.5107		97.3717	2.83958		90.1146	97.9592	90.787	90.4963	87.957		91.4628	1.69856		97.7477	97.7477	93.8815	89.1374	89.4118		93.5852	1.8966		87.9009	94.8718	88.0218	99.7921	97.4026		93.5978	2.42916		88.2615	94.1725	85.3403	85.2911	91.3486		88.8828	1.73056		79.9058	86.7347	79.1907
564.027		99.6047	96.2871	101.365	94.2613	96.6587		97.6353	1.26374		89.9714	100.454	93.0902	87.6452	86.0215		91.4364	2.54837		92.6426	92.6426	95.9847	92.1193	90.3529		92.7484	0.911867		85.7143	95.1049	86.5699	95.1144	93.5065		91.202	2.09071		87.8157	89.7436	87.4346	83.9632	89.5674		87.7049	1.04189		81.3187	83.9286	81.1175
566.02		96.5744	97.7723	104.288	96.5812	95.9427		98.2318	1.54282		90.1146	98.8662	89.2514	91.3411	86.6667		91.248	2.05311		96.8469	96.8469	92.1606	90.7348	94.1176		94.1414	1.22817		87.4636	92.3077	86.7514	100.624	93.9394		92.2171	2.51113		89.3016	87.4126	87.0855	86.7211	89.0585		87.9159	0.528968		79.4348	89.0306	79.3834
568.008		97.1014	96.5346	98.8304	92.5519	96.8974		96.3832	1.03612		94.5559	97.5057	91.3628	90.1795	87.0968		92.1401	1.79595		95.0451	95.0451	95.2199	93.1842	91.7647		94.0518	0.682677		91.691	97.4359	88.9292	98.4407	94.8052		94.2604	1.77312		90.3418	92.3077	90.4014	88.1512	86.2595		89.4923	1.0422		78.8069	85.7143	84.3931
570		100.527	94.3069	105.263	92.1856	97.3747		97.9315	2.3125		87.9656	100.454	92.5144	88.3844	89.2473		91.713	2.32638		91.5916	91.5916	95.4111	91.7998	91.7647		92.4318	0.746074		87.0262	93.2401	87.1143	96.1539	96.1039		91.9277	2.05202		88.1129	93.007	87.0855	88.8662	87.5318		88.9207	1.06419		79.9058	87.5	81.6956
571.993		98.5507	94.3069	100.78	92.0635	97.3747		96.6151	1.54454		87.6791	99.093	91.3628	91.1299	86.8817		91.2293	2.16068		96.2463	96.2463	95.7935	89.8829	90.1176		93.6573	1.49573		85.4227	92.3077	84.392	96.0499	95.2381		90.6821	2.44376		88.5587	91.1422	86.911	88.8662	87.7863		88.6529	0.708387		79.9058	83.9286	83.237
573.987		94.5982	94.3069	101.559	95.9707	96.8974		96.6665	1.31005		91.2607	102.041	89.6353	90.4963	93.3333		93.3533	2.25652		90.0901	90.0901	94.6463	91.2673	94.5882		92.1364	1.0354		89.2128	96.0373	85.4809	97.2973	97.1861		93.0429	2.40921		88.2615	90.9091	86.911	89.0705	90.3308		89.0966	0.717052		83.0455	86.7347	81.6956
575.976		100.132	94.802	100.585	93.4066	91.8854		96.1621	1.77555		86.8195	98.1859	90.2111	90.6019	93.1183		91.7873	1.88789		93.2432	93.2432	93.3078	90.8413	90.3529		92.1977	0.658089		89.6501	93.007	85.6624	98.9605	97.1861		92.8932	2.42957		89.153	91.1422	87.9581	86.9254	86.514		88.3386	0.836495		77.551	85.9694	82.659
577.969		100.132	95.0495	101.365	95.9707	96.8974		97.8828	1.22137		88.3954	101.361	88.8676	93.6642	88.6021		92.178	2.4958		94.8949	94.8949	93.3078	92.5453	92.9412		93.7168	0.495839		85.5685	95.338	83.3031	102.183	98.052		92.8889	3.6367		86.7756	91.8415	90.4014	86.4147	88.8041		88.8475	1.03903		79.5918	81.6326	81.5029
579.955		98.6825	95.7921	99.0253	94.5055	93.5561		96.3123	1.09796		87.8224	101.814	90.595	90.6019	96.3441		93.4355	2.51263		92.7928	92.7928	94.6463	91.0543	88.2353		91.9043	1.07892		89.5044	97.4359	85.6624	100.936	97.1861		94.1449	2.8256		86.7756	90.9091	87.7836	87.1297	85.7506		87.6697	0.874081		77.865	89.2857	84.7784
581.947		98.1555	95.0495	106.238	93.895	92.3628		97.1401	2.46499		89.9714	101.361	93.858	86.906	90.3226		92.4837	2.47769		91.1411	91.1411	93.8815	93.1842	88.2353		91.5167	0.985456		87.4636	91.3753	84.392	98.4407	90.4762		90.4296	2.34867		84.6954	87.8788	87.0855	84.6782	84.9873		85.865	0.674232		79.5918	89.5408	80.9249
583.934		94.7299	95.5446	98.6355	94.6276	93.0788		95.3233	0.919064		88.5387	97.7324	93.2822	92.7138	87.5269		91.9588	1.83024		92.1922	92.1922	93.3078	94.8882	91.5294		92.822	0.590307		88.7755	95.1049	85.118	100.208	95.2381		92.8889	2.65805		87.37	92.7739	90.2269	87.7426	85.4962		88.7219	1.26245		81.6326	82.398	82.8516
585.928		97.3649	98.5148	100.195	93.0403	95.4654		96.9161	1.23763		90.9742	102.721	89.4434	90.8131	87.3118		92.2527	2.69814		91.8919	91.8919	94.6463	89.8829	90.1176		91.6861	0.853201		90.8163	95.5711	88.2033	96.3618	92.6407		92.7186	1.50702		87.0728	95.1049	87.4346	85.4954	90.5852		89.1386	1.7049		79.1209	85.7143	83.4297
587.918		99.0777	97.0297	107.407	94.0171	95.4654		98.5995	2.35683		86.8195	100	93.858	88.8068	86.8817		91.2732	2.53024		92.4925	92.4925	91.3958	91.2673	87.7647		91.0826	0.869373		87.6093	94.1725	82.9401	97.1933	94.5887		91.3008	2.62018		88.1129	89.7436	85.6894	86.7211	89.5674		87.9669	0.789899		79.5918	88.5204	79.7688
589.913		100.79	97.0297	107.407	96.9475	99.5227		100.34	1.91424		88.3954	103.855	91.9386	91.5523	87.7419		92.6966	2.91067		90.991	90.991	93.3078	91.1608	88.2353		90.9372	0.805482		86.1516	92.7739	84.392	97.7131	93.9394		90.994	2.49023		87.0728	86.4802	87.9581	84.9847	89.313		87.1618	0.723673		78.6499	88.0102	81.8882
591.901		98.8142	97.2772	109.162	94.5055	94.5107		98.8539	2.70658		88.3954	99.5465	91.1708	88.1732	89.8925		91.4357	2.09909		88.5886	88.5886	94.8375	94.5687	89.6471		91.2461	1.42512		86.4432	95.338	87.4773	97.921	98.052		93.0463	2.5366		87.8157	91.8415	87.4346	88.2533	86.2595		88.3209	0.940455		79.1209	83.9286	81.5029
593.896		100.922	95.7921	109.747	93.0403	94.0334		98.7069	3.07596		93.4097	100.68	93.858	89.3347	95.0538		94.4673	1.82727		94.1441	94.1441	92.7342	93.1842	88.7059		92.5825	1.00724		84.6939	96.2704	85.118	99.5842	94.3723		92.0077	3.01766		87.37	91.6084	84.8167	86.4147	85.7506		87.1921	1.18025		79.2779	86.9898	80.9249
595.883		97.7602	94.3069	109.357	94.0171	97.136		98.5154	2.81027		89.255	98.8662	88.4837	90.9187	84.5161		90.4079	2.36166		95.1952	95.1952	93.8815	90.7348	88		92.6013	1.40981		85.4227	92.7739	83.8475	100.312	92.6407		90.9994	2.95646		89.153	90.2098	87.9581	81.4096	86.7685		87.0998	1.53481		78.3359	84.6939	81.3102
597.88		96.8379	100.248	105.653	96.2149	97.3747		99.2656	1.73981		90.9742	102.041	90.0192	89.7571	92.6882		93.0959	2.29448		92.3423	92.3423	93.6903	89.3504	89.8824		91.5215	0.820111		86.1516	97.669	85.2995	98.2328	91.9913		91.8688	2.73862		92.422	86.9464	88.1326	82.431	87.0229		87.391	1.59366		80.2198	82.1429	78.6127
[truncated: 71 more columns]

## Sheet: Figure 5h
Figure 5g			Lucigenin	Normalised Mock Subtracted:	R404V
Time		0mM						Mean	SEM		2.5mM						Mean	SEM		5mM						Mean	SEM		10mM						Mean	SEM		20mM						Mean	SEM		40mM
0		-5.10399	1.87105	-14.0516	-10.8963	9.17275		-3.80161	4.22851		-5.56467	-5.34733	-6.03021	-8.2595	16.9393		-1.65248	4.67669		1.55268	-0.2747	-1.01739	-3.84697	2.99836		-0.117604	1.16708		0.00100286	2.65651	1.22618	-7.80465	4.90426		0.196663	2.16023		4.32493	-5.22007	-8.52863	-6.13152	0.502429		-3.01057	2.3582		6.51644	-1.11699	-1.59722
1.99161		-4.16287	1.75815	-8.12161	-11.3755	7.15055		-2.95025	3.3421		-7.23079	-5.02006	-5.49316	-6.4261	15.9177		-1.65049	4.40855		0.84649	-0.50289	-0.56342	-5.01224	1.99647		-0.647118	1.18957		-4.59956	1.78759	-1.32775	-9.63433	3.36934		-2.08094	2.33062		4.87196	-4.09914	-3.10206	-4.03367	2.59846		-0.752887	1.8755		6.67473	1.7885	-0.0974829
3.98723		-4.4021	2.55697	-6.98552	-10.8242	7.70184		-2.3906	3.33632		-5.04164	-5.5767	-6.74792	-5.47326	17.7501		-1.01789	4.70049		0.623459	1.83975	-4.58356	-2.29175	0.726979		-0.737025	1.17998		-2.69544	5.43962	1.62667	-9.5607	3.39167		-0.359639	2.66237		2.34004	-4.84517	-5.35774	-7.74451	2.97524		-2.52642	2.17454		2.79312	-4.31053	-1.72412
5.97789		-6.2829	1.56256	-4.74039	-8.62404	11.0565		-1.40566	3.5435		-4.02582	-8.76206	-6.30516	-7.03683	12.1713		-2.79172	3.81723		0.392003	-0.438737	1.19443	1.01035	1.37169		0.705949	0.330406		-2.92842	2.8172	3.64299	-9.77337	0.919093		-1.0645	2.4544		2.52269	-4.36811	-3.72007	-6.65197	0.0394443		-2.4356	1.64123		5.9963	0.521379	1.01536
7.97268		-4.48538	2.83698	-7.20056	-10.0624	6.5321		-2.47585	3.10875		-5.49443	-5.49248	-10.0311	-7.97005	17.154		-2.36682	4.95354		-4.71606	-1.92943	-1.38922	-2.59957	0.788273		-1.9692	0.891185		-4.94774	1.03166	1.33794	-11.0423	6.55946		-1.4122	3.01929		3.20841	-5.7599	-7.49411	-9.27211	3.84171		-3.0952	2.76099		1.16771	-5.75929	-4.52703
9.96509		-4.19609	0.239793	-10.2991	-11.4087	5.208		-4.09121	3.14107		-5.23957	-7.45679	-5.61052	-5.11355	19.2713		-0.829823	5.04294		-0.383011	0.410359	-1.50669	-6.46865	3.70037		-0.849525	1.65095		-0.0603257	4.34377	0.840494	-9.154	9.10567		1.01512	3.00944		6.9694	-3.8692	-6.30394	-6.73712	0.516987		-1.88478	2.56103		0.333149	-2.6692	-0.972951
11.966		-0.942399	0.347401	-10.9186	-10.1988	8.42707		-2.65707	3.60525		-8.31201	-7.7958	-4.65775	-7.25105	19.7106		-1.6612	5.37981		-0.522567	1.731	-1.87851	0.144713	1.35802		0.166533	0.652868		-0.316063	4.05916	1.20357	-7.41315	6.47341		0.801383	2.36299		4.51143	-3.37867	-6.10631	-7.00351	4.67663		-1.46009	2.5428		0.86515	-5.84599	-3.39524
13.9566		-4.71825	0.50815	-11.0054	-12.7276	8.57899		-3.87282	3.90023		-6.8476	-5.71089	-5.78314	-8.18511	17.6627		-1.77281	4.87955		1.58865	-3.48629	2.97876	-3.33608	3.22935		0.194879	1.49865		-1.83899	-0.522957	3.38475	-9.33037	2.57395		-1.14672	2.26073		4.71318	-5.84593	-3.56496	-6.30951	1.65598		-1.87025	2.1698		1.12327	-1.40814	-2.63745
15.9573		-0.5421	7.16737	-5.9085	-6.64324	4.26796		-0.331702	2.72372		-0.573289	-6.76688	-8.11306	-8.89318	14.9096		-1.88736	4.447		-3.08975	-0.166741	-1.78405	-3.08399	-1.41513		-1.90793	0.550897		-2.45278	-0.408574	1.24471	-7.57482	2.60509		-1.31728	1.77793		5.22284	-3.96086	-3.72044	-11.6872	2.75814		-2.27751	2.95864		0.416484	-4.86217	-4.07229
17.9498		-2.82538	0.15731	-5.86724	-8.53417	8.29905		-1.75409	2.90477		-7.97077	-7.20409	-6.08988	-6.07245	18.1166		-1.84411	5.00301		2.6881	-3.66935	2.49345	-0.696749	6.17088		1.39727	1.66899		0.2345	2.10202	0.5435	-11.1091	2.30182		-1.18545	2.51449		0.859457	-4.77854	-5.11904	-9.58722	0.879957		-3.54908	1.99358		1.67592	-6.48735	-1.98497
19.9479		-3.95793	0.545776	-11.568	-12.2149	8.34253		-3.7705	3.85681		-4.99574	-6.7367	-10.0541	-12.4566	13.5676		-4.13511	4.61073		3.76641	0.560801	-0.183149	-1.48309	0.421061		0.616407	0.866341		-0.665253	2.71912	1.28879	-10.1329	2.58592		-0.840867	2.4013		4.90626	-3.02744	-8.89766	-5.61512	1.78406		-2.16998	2.48569		5.02076	-4.08439	-5.66907
21.9372		0.0695257	4.72489	-8.14688	-9.64636	10.073		-0.585176	3.7517		-6.09005	-5.22851	-10.343	-11.5076	10.1062		-4.61258	3.87028		0.459524	2.37213	-2.24892	-1.74332	1.67909		0.103704	0.913798		2.29274	5.76308	1.22418	-7.67799	6.31253		1.58291	2.51237		3.62949	-3.45361	-4.55199	-8.58182	2.79919		-2.03175	2.30938		3.67964	-2.7175	-0.380787
23.9334		-1.76197	3.58411	-7.03823	-11.1468	8.71123		-1.53033	3.5631		-3.93039	-4.3943	-6.15831	-5.9682	10.6902		-1.9522	3.19004		-0.57837	-2.03659	-0.40468	-1.18904	0.83163		-0.67541	0.472785		-1.19658	-1.39604	1.08472	-7.29599	3.28262		-1.10426	1.76731		-0.757671	-2.07177	-7.53803	-10.3036	0.366029		-4.06101	2.06794		3.79651	1.2651	-2.6617
25.9238		-2.29098	5.6422	-7.08723	-8.24397	12.4133		0.0866726	3.93274		-6.68029	-0.00557143	-6.91623	-5.64218	21.1985		0.390837	5.35213		1.59248	0.407021	-2.46731	-3.98514	2.63718		-0.363153	1.24431		-0.808901	3.44943	-1.86873	-10.8799	7.77843		-0.465943	3.11317		6.4825	-8.15261	-0.345597	-9.36001	2.4241		-1.79032	3.05014		5.26881	-1.93295	2.25731
27.9208		1.18832	-0.392383	-6.84394	-7.36448	8.73064		-0.936371	2.95365		-6.22293	-4.47807	-5.43951	-7.72595	17.0697		-1.35936	4.63784		0.85949	-4.58394	-3.82789	0.47045	5.17357		-0.381664	1.77007		-0.813933	4.31767	4.10953	-13.1743	5.44987		-0.0222349	3.46016		4.75237	-7.03914	-4.41035	-11.0621	4.08917		-2.734	3.10888		9.57867	1.84715	0.929959
29.9136		1.41215	4.32277	-6.8998	-9.32253	10.1305		-0.071384	3.59026		-6.31647	-8.42649	-9.17988	-8.03068	9.66435		-4.45784	3.56163		-0.790494	1.04016	-0.548754	-4.99757	1.54055		-0.751224	1.15185		-0.0173729	2.5797	-0.354153	-9.36197	3.0792		-0.814921	2.24263		3.72572	-2.88839	-0.901544	-7.97468	1.22201		-1.36338	1.98534		4.84655	-2.571	1.94219
31.9077		-2.83476	-2.25948	-9.91779	-10.8089	7.84471		-3.59525	3.35594		-7.20145	-2.37685	-6.61821	-4.02856	15.4448		-0.956064	4.19232		0.917394	0.482024	-3.64683	-8.44181	-0.395456		-2.21693	1.74957		-4.31918	3.75812	-2.38921	-9.0624	5.23997		-1.35454	2.63531		2.04033	-6.94568	-5.88391	-6.72567	4.49933		-2.60312	2.4354		8.67201	-2.39545	0.123129
33.8992		1.53382	-0.0749314	-9.58654	-10.1328	6.33414		-2.38526	3.22961		-6.57207	-6.498	-9.67609	-8.88219	18.7993		-2.56581	5.37789		2.74048	-1.42045	-2.08299	-5.36523	1.44777		-0.936087	1.42069		-0.95671	3.73894	4.59138	-8.71933	3.95539		0.521934	2.51282		1.78737	-3.51263	-3.21485	-8.13011	1.97677		-2.21869	1.88762		4.90713	0.648897	3.00184
35.8949		-2.2041	3.40548	-8.19151	-7.66241	8.7713		-1.17625	3.25796		-0.32088	-5.55904	-10.0289	-7.2007	21.9708		-0.227748	5.77014		4.34716	1.05959	1.62694	2.52473	6.34857		3.1814	0.967977		3.38145	1.98624	0.863893	-6.79597	6.3985		1.16682	2.19595		5.20873	-3.20888	-4.24623	-9.15686	0.858809		-2.10889	2.427		7.52306	-8.09703	1.58603
37.8858		-2.05833	2.80867	-7.85081	-9.71445	6.76907		-2.00917	3.11262		-6.31349	-7.42064	-8.74984	-6.70804	16.2616		-2.58608	4.73014		-1.64932	1.17796	4.45057	-2.60731	2.56866		0.788112	1.30778		-1.93311	1.39349	-0.193356	-7.61551	3.27495		-1.0147	1.86131		7.79237	-7.26524	-4.40091	-8.83932	4.73137		-1.59635	3.32153		4.05167	-1.14848	2.85991
68.0894		0	0	0	0	0		0	0		0	0	0	0	0		0	0		0	0	0	0	0		0	0		0	0	0	0	0		0	0		0	0	0	0	0		0	0		0	0	0
70.0776		0.776481	1.24348	0.807281	-3.92462	-0.533519		-0.326179	0.947528		-0.0552043	0.111796	2.3454	1.2422	-1.84708		0.35942	0.700902		1.35994	-1.28768	-4.32107	5.03834	-0.482144		0.0614737	1.5456		1.11548	4.61198	1.11548	2.05108	2.41418		2.26164	0.641056		1.94295	-3.61335	-2.67729	1.15345	-2.36422		-1.11169	1.1122		1.159	-1.54902	-0.732101
72.0716		0.868869	-2.72428	1.10007	3.27857	4.48877		1.4024	1.23392		-0.422494	1.85651	-3.15002	-1.25919	-8.66506		-2.32805	1.77648		0.499549	-1.54747	2.68495	2.54215	-3.56546		0.122743	1.20318		-0.599169	3.91842	0.317001	-0.699479	2.88612		1.16458	0.944756		2.99733	0.998829	-1.38953	1.48333	-0.611471		0.695697	0.776744		1.93718	-1.37913	-0.681651
74.0634		-1.19856	1.80365	2.64225	-1.89255	4.10175		1.09131	1.14286		-0.712779	-1.35699	1.34715	0.109151	-3.0072		-0.724133	0.727929		0.953504	3.7919	-2.48818	-0.111456	-0.458256		0.337504	1.0279		-2.83437	2.23743	1.09863	-0.251066	0.589134		0.167954	0.851933		1.67193	-6.83018	-1.87527	-1.10482	1.28743		-1.37018	1.52405		6.59893	1.69313	4.13013
76.0598		-2.31561	1.74062	6.28292	3.29472	4.75472		2.75147	1.47439		0.0235071	-0.322793	0.602007	3.04071	-5.28077		-0.387469	1.35737		1.1041	-3.04437	-2.52879	3.1275	-1.48414		-0.565144	1.16767		-0.420639	1.79415	3.79225	-1.08495	-2.2185		0.372463	1.07662		-1.70664	-0.943257	-1.40946	-2.43091	1.38954		-1.02014	0.649061		1.66231	-1.08494	-1.49193
78.0481		0.806607	-0.806393	2.59721	-1.78979	-0.824093		-0.00329286	0.772295		-3.6574	2.01246	-0.167539	0.226261	-8.46222		-2.00969	1.85635		1.38021	3.27706	0.38313	5.68376	1.53036		2.4509	0.932828		-2.53437	-3.29075	-1.03801	-2.2607	-2.0087		-2.22651	0.366642		0.342577	-4.44762	-2.17154	-2.7033	0.765977		-1.64278	0.975069		2.93349	4.46409	1.00671
80.0421		1.43762	-1.49683	9.15012	-0.25588	1.18162		2.00333	1.86316		-1.80709	0.532567	-3.25351	-0.268833	-5.53572		-2.06652	1.08394		0.253396	-4.07281	-2.90095	1.3322	-0.562404		-1.19012	1.00192		-3.7406	-0.0667171	-0.0933671	-2.17407	-1.09902		-1.43475	0.694516		2.27768	-7.24413	0.385976	-2.90427	-1.62832		-1.82262	1.61695		1.79193	2.08623	-2.53263
82.0316		1.87937	0.481966	2.75317	-0.999834	2.34697		1.29233	0.689261		-1.03631	0.0500871	-2.67191	1.40719	-4.26273		-1.30274	0.997021		3.74079	-1.66396	-0.791851	4.46519	0.737789		1.29759	1.21352		-3.86225	1.32576	-3.59769	-3.10944	-2.32059		-2.31284	0.946719		2.67276	-2.71454	-2.94276	2.19886	-1.93161		-0.543457	1.23007		2.22612	-0.305279	5.51585
84.0267		-1.47894	2.46546	-0.572844	0.943756	1.83756		0.638996	0.735514		-2.83425	-1.09135	-2.3126	0.0390457	-5.84593		-2.40902	0.993272		2.17125	1.35231	1.18824	2.95515	-1.72347		1.18869	0.793513		-0.863766	1.61436	0.162454	-1.81599	-2.06529		-0.593644	0.677488		8.73092	-4.44428	-0.30708	0.13132	-1.24494		0.573188	2.19088		-1.40908	1.00458	1.64508
86.0179		1.15223	-1.63057	7.47863	0.441829	-2.3554		1.01734	1.73903		-4.45397	4.19983	-1.20751	-2.17713	-3.59622		-1.447	1.51885		0.386596	0.837046	-1.2662	3.39295	-2.92766		0.0845437	1.06068		-1.58168	3.13945	-0.305441	-0.0199514	1.39125		0.524725	0.806549		1.11898	-3.14362	-1.5107	0.515276	-2.08488		-1.02099	0.800526		3.67751	7.17041	2.57861
88.0107		0.349223	1.49102	3.05672	-4.77268	-0.993077		-0.173757	1.32858		-5.9539	2.23503	2.13143	0.749927	-5.88581		-1.34467	1.88616		2.91553	-1.30184	-1.05761	2.58013	-1.68971		0.289304	1.01013		-0.129206	-1.78979	-2.05124	-3.64199	2.68911		-0.98462	1.07414		-0.413983	-3.76189	-1.48703	-1.08255	-0.519843		-1.45306	0.609086		2.75144	-2.13474	3.02972
90.0036		-1.69277	-0.523003	1.5687	-1.5031	4.7188		0.513723	1.20014		-2.87534	-0.487241	-1.4996	-3.38169	-5.81677		-2.81213	0.907857		-2.79254	-0.813054	0.251506	0.699306	-1.58675		-0.848308	0.629734		-0.943816	2.20473	0.701214	-2.49822	3.70323		0.63343	1.09982		1.67214	-2.94896	0.606117	3.23214	-0.746083		0.363069	1.05366		3.97216	1.77434	4.00786
91.9985		-0.734877	-4.95878	1.34082	0.466823	2.10422		-0.356357	1.24375		-5.67237	1.40646	-0.512043	-2.14381	-6.67924		-2.7202	1.52687		-2.02979	1.34166	1.12336	0.164894	-0.758986		-0.0317697	0.623708		-2.04977	1.44809	1.00859	-3.77146	0.499091		-0.573091	1.00366		2.01504	-0.805359	-0.0462586	0.417761	-1.20928		0.0743814	0.562154		2.77701	-3.24732	-4.04507
93.9902		-3.65241	-4.07147	3.1502	-1.3354	4.176		-0.34662	1.70971		-4.67561	0.529383	1.92568	1.31188	-9.83999		-2.14973	2.25044		3.09687	4.20167	-0.19356	4.55277	1.85077		2.7017	0.864267		6.80029	4.23479	7.19019	2.70074	3.38564		4.86233	0.906132		1.43346	-6.87645	1.39556	-3.51614	1.68596		-1.17553	1.72604		1.81092	-1.23069	-4.45461
95.9848		-4.58955	-4.41377	0.4532	0.9952	3.7983		-0.751324	1.63318		-5.58636	-1.20483	-1.62357	-2.59319	-5.94776		-3.39114	0.997404		3.11374	3.03174	1.47501	4.19794	0.225197		2.40872	0.697355		0.195444	0.226364	1.98624	1.80136	4.33896		1.70968	0.757996		1.84615	0.657454	-1.08775	3.51755	-3.4138		0.303924	1.1956		4.48988	2.64527	-0.06304
97.9736		-0.475394	0.251206	2.57491	1.33681	2.60241		1.25799	0.615068		-1.66832	3.61924	1.68374	-1.39722	-6.47222		-0.846953	1.71715		0.956204	1.78891	0.668824	1.58126	-2.69863		0.459316	0.815168		-0.197223	4.11751	2.79548	4.71601	3.23506		2.93337	0.851194		4.28097	-3.05843	0.669971	-2.58176	-1.30039		-0.397927	1.33593		0.388983	-2.20128	-2.80095
99.9655		-0.568139	0.158461	1.89736	2.58716	-1.30897		0.553175	0.735685		-5.60389	0.114441	0.900041	-4.08166	-6.61076		-3.05636	1.51463		2.17191	3.94621	5.36731	4.03131	0.0139886		3.10614	0.924898		-1.97859	6.18263	0.145303	-1.78372	0.305183		0.574163	1.47965		0.793399	0.0504986	1.9702	-5.1589	-0.712861		-0.611533	1.21996		1.0274	-0.581704	0.235216
101.955		-5.1044	0.74453	11.9825	-0.61517	1.65493		1.73248	2.81336		-3.60109	3.46541	-1.50626	0.0485114	-3.8186		-1.0824	1.34111		-0.668829	-1.85561	2.70362	1.51532	-2.54659		-0.170417	0.995899		4.5736	3.9321	-2.10862	-0.251096	3.04965		1.83913	1.2899		2.31462	-3.24168	-0.734944	0.810116	-2.247		-0.61978	1.00476		6.01907	-2.61518	-0.346289
103.948		0.302387	-1.57806	8.28919	-2.65701	2.53239		1.37778	1.94002		-2.12531	0.787421	0.456221	3.36512	-5.71098		-0.645505	1.53625		-0.410769	2.29193	1.52711	-0.476969	-0.296309		0.526999	0.577945		4.29265	6.79899	3.17092	3.29619	6.46599		4.80495	0.772791		2.78972	-1.72648	1.1293	-2.78198	-1.49516		-0.416917	1.02821		4.83757	3.01257	-0.971247
105.935		-0.448273	-2.95939	6.45911	-3.27249	3.38761		0.633311	1.88227		-6.21271	5.09205	3.92425	0.920359	-2.63382		0.218025	2.09133		2.13461	-0.4993	0.53688	5.09201	4.27231		2.3073	1.06436		2.36122	8.13164	3.85758	2.63489	1.15529		3.62813	1.20501		1.9132	-3.2178	1.1513	-1.04919	-2.26583		-0.693665	0.979005		4.51164	4.09954	1.84982
107.932		-1.00626	2.95022	12.8608	0.970017	1.92472		3.5399	2.41979		-5.8939	-1.18982	0.223389	-1.47549	-6.97287		-3.06174	1.41652		1.57731	3.93836	0.525109	2.30887	-0.665761		1.53678	0.782305		4.55698	2.8964	4.26835	2.0837	4.34495		3.63008	0.485137		0.852417	-2.85678	1.27922	-0.921273	-6.20916		-1.57112	1.37085		1.43792	0.888466	1.63755
109.921		-1.09201	0.620766	6.27377	1.47547	3.24607		2.10481	1.25501		-4.38684	1.29545	0.632954	1.80445	-9.1208		-1.95495	2.10546		1.98189	4.61574	0.902697	0.941387	1.72646		2.03363	0.67957		0.948573	5.37951	2.26925	0.185163	2.71551		2.2996	0.893193		-2.19671	-4.69396	0.607536	-0.469354	-6.11748		-2.574	1.25985		4.16201	0.512089	2.98447
111.922		-2.8603	2.24995	2.30885	-2.54515	1.20675		0.0720229	1.15071		-5.31803	4.44683	5.49483	1.06104	-1.73852		0.789234	1.99101		3.25526	5.08396	0.113876	4.62056	5.20266		3.65526	0.950495		1.09201	3.33704	3.38865	2.42669	-0.542411		1.94039	0.747282		3.85783	-5.57948	-0.451273	0.0594271	-2.9958		-1.02186	1.58074		1.80668	3.5924	0.571969
113.912		-0.85194	-3.47496	3.23616	0.95056	0.18476		0.008916	1.10025		-5.80075	1.43368	-0.3107	-1.61637	-4.01284		-2.0614	1.28976		0.806444	2.52624	-1.70736	3.15994	-1.45677		0.665702	0.995965		-0.7769	-0.51219	1.9986	1.47546	4.09991		1.25698	0.892934		5.24718	1.02538	0.155219	-1.25324	0.133899		1.06169	1.10817		0.400637	-3.07267	0.471727
115.906		0.588104	-3.40425	11.1722	0.427404	3.1637		2.38943	2.43308		-5.11622	1.13914	-1.44271	-1.41414	-6.26636		-2.62006	1.35089		-2.04938	3.04197	2.98767	4.20267	4.25237		2.48706	1.16614		-1.32554	8.1772	1.02428	3.5089	3.6484		3.00665	1.58266		2.33631	-3.45029	0.572206	-3.45815	1.44481		-0.511026	1.23351		1.83465	-0.24542	1.45625
117.898		1.32737	-2.08615	0.141569	2.94987	5.63087		1.5927	1.30113		-5.51735	3.69814	1.98944	3.66034	-5.52136		-0.338154	2.1376		1.98201	3.31961	2.11809	3.62841	-1.35238		1.93915	0.883948		0.144083	6.82006	1.58355	1.96276	6.55366		3.41282	1.37127		0.42423	-1.6709	1.70966	-2.33354	0.78644		-0.216822	0.765626		3.53089	1.52928	1.32579
119.897		-2.11418	1.97406	9.15566	-0.250344	3.33516		2.42007	1.92477		-6.74131	1.55581	2.91721	2.00591	-6.0296		-1.2584	2.10758		1.06241	0.653271	-0.139939	2.49581	0.786841		0.971679	0.430259		0.40119	6.05744	2.89388	3.61304	3.70979		3.33507	0.906402		4.19899	-0.42491	1.49847	-1.6978	-0.87154		0.540642	1.05447		3.87278	4.32411	3.28748
121.89		-1.20441	-1.38801	8.42661	-1.61559	1.04291		1.0523	1.90455		-0.664837	3.01172	1.58152	1.62002	-1.81313		0.747061	0.869917		0.343773	4.71127	0.834123	2.42668	0.157933		1.69476	0.85331		0.58855	6.79765	2.67673	0.9292	6.26485		3.4514	1.30902		0.323919	-1.45638	-2.44248	0.583919	0.684219		-0.461361	0.629942		3.20794	-1.14841	5.81253
123.885		-1.52617	-1.47823	9.20584	-0.979857	4.75364		1.99505	2.15544		-8.07722	0.0889671	1.24057	1.14497	-4.85727		-2.092	1.86829		2.39733	1.27809	3.98213	2.45493	-2.03298		1.6159	1.00852		-1.1632	3.88176	3.8018	1.30191	5.11386		2.58723	1.12367		5.38339	-3.29051	1.72049	-0.364984	3.91599		1.47287	1.53931		0.722091	-2.22139	-1.81146
125.876		-2.62566	-2.97689	9.49248	2.92048	2.60988		1.88406	2.27437		-6.17631	2.28778	2.04408	4.29078	-7.04146		-0.919026	2.35933		2.34973	3.71485	-0.0549729	3.08657	1.328		2.08483	0.666414		0.95596	2.47281	-0.30282	1.37661	1.27401		1.15531	0.445239		1.09982	-3.90298	-1.33644	-3.82179	0.568616		-1.47856	1.05422		5.86897	-3.1773	3.50697
127.872		-1.91834	-1.27947	11.3694	-2.4772	0.930504		1.32498	2.57687		-3.64505	-0.25409	0.461	2.65924	-8.16426		-1.78863	1.88804		-1.55848	2.60437	2.44157	3.10477	-2.23504		0.871434	1.14041		3.58831	6.79463	2.54383	3.23828	8.44303		4.92162	1.14398		-2.23449	-5.34377	-3.35448	-1.1663	1.94644		-2.03052	1.2111		1.24553	-1.36436	-0.959843
129.864		2.12303	-0.00494143	10.1098	3.31503	5.78503		4.26559	1.73487		-1.22269	5.35427	7.25757	0.0210214	-4.30708		1.42062	2.13654		1.08542	3.97892	0.975174	3.63272	-0.877486		1.75895	0.90714		1.05212	4.63935	3.47046	2.99505	9.33465		4.29833	1.38569		2.36321	-3.25439	0.476429	-1.68555	0.411149		-0.337831	0.970626		1.73319	-1.95598	2.48938
131.859		-2.84612	-0.622343	8.29196	-1.11404	3.90346		1.52258	2.02646		-4.51703	1.97736	-2.76841	-4.84305	-6.24147		-3.27852	1.42557		4.44774	1.49982	3.05534	3.14004	-2.40052		1.94848	1.18335		1.3271	1.59248	3.99837	4.32984	6.72069		3.5937	0.990608		1.10268	-1.71495	-1.94195	0.220563	-1.50499		-0.767727	0.603934		1.10541	-0.07198	3.29596
133.849		-0.133201	1.33206	14.835	2.06798	7.30748		5.08186	2.74243		-5.77834	4.64312	4.12082	-1.187	1.45682		0.651088	1.91495		0.100157	3.60801	-3.16554	3.16601	-0.811703		0.579385	1.26595		0.586409	7.3786	2.8947	3.4852	7.0623		4.28144	1.29491		2.40582	-1.47518	0.971717	-3.36094	-3.95743		-1.0832	1.22472		3.12593	1.47758	1.76266
135.845		0.292226	-3.58827	12.3309	1.97605	1.37109		2.47641	2.64703		-8.89156	-0.533703	-0.0632129	0.541177	-3.45082		-2.47962	1.74366		0.630587	0.0988271	0.370187	4.41214	-1.48247		0.805853	0.973708		0.924623	6.08443	0.251853	4.73623	2.98753		2.99693	1.10426		0.964284	-0.347036	5.41696	3.47166	0.668994		2.03497	1.05328		1.48634	3.03657	0.765234
137.834		0.184066	-0.921804	7.72322	3.49042	1.27052		2.34928	1.52861		-3.76552	5.96331	1.34066	-2.22105	-4.98836		-0.734196	1.98317		1.4946	6.28565	10.629	3.08005	7.02545		5.70296	1.59601		1.33809	7.75208	3.75934	3.80198	5.15468		4.36124	1.04742		2.17789	0.65391	-0.27239	0.2558	-0.08988		0.545066	0.43778		3.00455	0.414281	0.699361
139.829		2.09134	0.705936	10.4679	1.32974	6.46934		4.21286	1.86185		-3.16066	7.22466	2.56724	-0.658416	0.562414		1.30705	1.7462		-0.407214	0.698916	0.915996	4.57554	1.50446		1.45754	0.838755		1.34575	4.84497	2.01773	0.501114	4.71177		2.68427	0.888298		2.0623	-2.23845	-0.484709	-1.32701	-2.94131		-0.985835	0.867513		0.00511	2.81123	4.20078
141.821		-2.01325	1.95924	11.3376	1.32544	1.18124		2.75806	2.25335		-3.96191	-0.248351	0.955069	2.50055	-2.96213		-0.743355	1.2028		-0.0512486	-0.159439	4.12595	3.87185	1.19941		1.79731	0.930855		-1.73172	4.94562	2.04011	2.21142	6.79382		2.85185	1.44916		0.62986	-1.61386	0.37054	-1.25505	0.08012		-0.357678	0.45169		0.565403	0.977483	3.37662
143.817		-3.34408	-1.97861	8.90046	-2.82334	0.434559		0.237797	2.26046		-0.795671	4.31356	0.00425857	4.29456	4.00486		2.36431	1.13517		2.11819	3.20989	2.88299	-0.437719	0.000541429		1.55478	0.748555		2.17013	6.68908	-0.388959	5.33773	9.07008		4.57561	1.66855		1.25734	-5.39767	-1.25678	-1.58425	-1.62714		-1.7217	1.06375		2.13447	0.446866	5.98047
145.806		2.70586	-0.719736	9.41676	0.0128643	2.38286		2.75972	1.79043		-0.890666	6.49839	7.38939	5.24009	-6.34188		2.37907	2.61729		2.79496	-1.66763	3.57376	0.979204	-0.779366		0.980188	1.00317		-1.67361	6.60586	0.280426	2.99596	6.98886		3.0395	1.70505		2.00973	-2.73402	1.34951	-3.05093	0.23045		-0.439052	1.04241		-0.0603614	3.98203	5.56966
147.803		0.980189	-0.936091	16.0693	0.446909	0.602229		3.43251	3.17578		-3.54221	0.409524	-2.8883	-0.978836	-7.77427		-2.95482	1.39284		0.631289	3.47039	-0.790401	2.18172	-3.55455		0.387689	1.21881		2.14691	8.5011	2.8517	2.4027	3.12315		3.80511	1.18623		1.24168	-0.302737	-1.46092	1.50182	1.9642		0.588811	0.63827		-2.489	-4.01961	-2.53225
149.796		-1.49789	-1.89706	7.88044	0.69364	3.42444		1.72071	1.80759		-2.54888	5.06698	-0.986696	-1.59231	-0.688266		-0.149832	1.34242		1.60343	0.21143	-1.18253	2.36813	-3.40275		-0.080458	1.0288		-2.88596	7.75476	3.14098	6.58926	5.93991		4.10779	1.90607		2.60607	-4.49464	0.693374	-1.39624	-1.23301		-0.764886	1.18361		-2.31177	1.08305	-0.100053
151.792		-0.659066	0.0476443	11.9013	-1.40759	0.312884		2.03904	2.48363		-3.9873	0.609573	-1.32766	2.58816	-4.27815		-1.27907	1.32011		4.24892	4.39907	1.91341	5.88997	0.869657		3.4642	0.90859		2.24732	6.65006	2.99364	5.37431	4.96841		4.44675	0.804242		1.15021	-3.95479	0.593724	1.11318	0.0488443		-0.209764	0.957533		0.768239	-1.05672	6.09153
153.781		-2.61388	-1.92707	10.2948	1.76918	2.45748		1.9961	2.29974		-0.198774	1.74723	3.43983	-0.591504	-7.08172		-0.53699	1.78863		1.45972	0.491277	-0.330313	1.93991	0.758427		0.863803	0.392995		-1.79087	9.37381	2.63548	2.85961	6.59326		3.93426	1.90102		-0.693066	-5.13964	-2.45227	-2.08576	-1.41181		-2.35651	0.757885		0.150269	-2.40075	2.80451
155.779		0.0212614	2.59626	9.95736	-3.30444	0.580661		1.97022	2.21063		-2.08742	1.64985	-0.863194	2.78364	-3.23787		-0.351002	1.12785		2.7035	-1.1309	2.68943	3.24126	-1.48693		1.20327	1.03195		0.29806	6.5656	-0.04455	3.1132	6.4824		3.28294	1.43218		3.28895	-3.21746	0.74891	-2.67268	2.5887		0.147284	1.33166		-1.30447	-1.85392	0.471979
157.769		-1.36289	3.92712	11.7461	4.51432	5.53572		4.87207	2.09271		-2.39047	5.65519	-1.74206	3.53659	-6.33661		-0.255473	2.15713		2.66628	5.70993	2.32377	3.76626	2.50058		3.39337	0.631477		5.3081	9.41793	2.34158	3.83613	8.65203		5.91115	1.36421		-0.520257	-4.26753	1.03642	-3.64942	-0.475637		-1.57528	1.01719		0.512059	1.25774	-1.66487
159.762		-2.25922	0.0963243	9.20552	-4.91308	3.19012		1.06394	2.43424		-2.65793	2.26053	1.35353	1.67033	-0.366904		0.451908	0.891912		4.01349	8.91274	2.08738	0.610886	-2.29458		2.66598	1.87087		1.43329	12.16	4.43763	5.00002	7.13167		6.03252	1.78208		3.99814	-2.10334	4.19159	-0.728306	3.87186		1.84599	1.35022		1.0106	-2.52158	2.80853
161.75		-1.19152	2.74896	9.68306	1.00966	3.38526		3.12708	1.82105		-0.595153	4.23988	-2.58245	2.18682	-1.81676		0.286465	1.27813		-1.23269	1.51132	-0.0467057	4.09936	-2.8257		0.30112	1.18621		-1.32104	9.49365	-0.563076	6.1767	5.1813		3.79351	2.06441		0.21032	-0.27077	-0.61249	-2.10153	0.87159		-0.380576	0.497222		1.63579	1.61617	0.807613
163.744		-1.26903	-1.84789	9.13633	-0.732373	-0.371573		0.983091	2.05353		-1.67057	-1.1563	-1.34911	0.704449	3.48853		0.00339857	0.964727		4.90688	7.40433	5.65763	5.44464	4.95175		5.67304	0.455907		0.567999	5.67072	-0.423311	10.0587	5.10462		4.19575	1.89568		0.390779	-0.771951	0.105529	-3.59273	-1.02819		-0.979313	0.704605		1.39732	2.41773	0.00532286
165.735		3.20602	-1.03385	13.2053	-0.617676	7.21362		4.39469	2.66063		-2.78825	3.76598	0.398541	0.551361	-0.355179		0.314491	1.05003		-0.76508	-1.54206	1.62325	3.98547	-0.43546		0.573224	1.00072		3.06244	6.58986	3.21985	0.614304	6.12366		3.92203	1.09858		1.52027	-2.03753	-0.981867	-3.98615	-4.26711		-1.95048	1.06072		1.55135	2.3559	0.459096
167.732		0.0403286	-2.96584	13.1855	2.10011	3.87621		3.24726	2.73283		-0.28846	3.23347	1.47116	0.04996	-0.8643		0.720366	0.736808		2.94256	5.65841	2.16367	3.16083	-2.89493		2.20611	1.40347		1.26924	6.37196	4.81514	3.17156	6.88811		4.50321	1.03704		6.4771	-4.01791	3.2082	-3.32908	-3.66203		-0.264744	2.15095		0.482776	0.188426	2.06656
169.72		-0.395311	1.26956	7.15466	-2.89184	5.06156		2.03972	1.81847		-2.73287	3.49869	-0.54895	0.87103	-1.08762		5.6e-05	1.04767		3.00507	1.36784	4.39747	5.91017	2.79451		3.49501	0.77146		3.76474	4.81675	5.01981	5.47825	5.54935		4.92578	0.321155		-0.705263	0.465787	1.51657	-1.41997	0.782517		0.127927	0.527312		2.86499	-2.37441	0.638146
171.712		-1.15244	3.04763	11.767	1.94543	5.66413		4.25436	2.17311		0.935306	4.61187	0.302566	-0.475734	3.44297		1.76339	0.968716		2.90775	7.5893	4.53126	7.6583	1.59031		4.85539	1.22249		1.80549	6.96666	1.28722	9.61266	8.36526		5.60746	1.71193		2.90984	-2.34375	3.25188	1.19204	2.16879		1.43576	1.00878		0.770187	1.82985	8.26982
173.702		5.02267	3.22997	10.1795	3.33547	3.18567		4.99065	1.34206		2.28666	4.68616	0.359026	-0.745994	-4.38124		0.44092	1.51818		2.22344	2.27852	1.53958	5.62264	-0.680643		2.19671	1.01132		0.720617	8.70787	0.672467	2.58112	4.02922		3.34226	1.48057		2.61514	3.93477	6.20717	1.334	3.99705		3.61762	0.811487		-0.0930157	1.71232	0.263304
175.696		-3.26445	0.34081	14.5337	-1.35862	2.03808		2.4579	3.14479		-4.60299	5.53193	-0.17273	-4.41646	1.48537		-0.434976	1.90506		5.63396	4.81502	4.45975	4.07489	1.50395		4.09751	0.697631		-0.67454	6.38167	1.42818	5.07757	8.21317		4.08521	1.62809		1.40273	-1.8579	3.7353	-1.45718	-0.270687		0.310455	1.02681		3.93551	-1.38238	2.1512
177.685		1.7759	-0.00863286	13.8779	0.519667	3.91637		4.01623	2.55643		0.912631	7.20306	-0.106729	0.0746614	-3.74861		0.867003	1.77521		2.4881	-1.85117	0.329731	1.89805	0.330181		0.638979	0.754862		2.02333	5.43523	2.29662	1.32447	5.96803		3.40953	0.952811		4.68289	0.277193	2.03216	-1.07426	1.03699		1.391	0.966722		0.177823	2.43449	4.57312
179.684		-0.629094	1.19555	6.43702	1.58512	1.25758		1.96923	1.18248		-3.15388	5.29788	1.61709	1.9432	4.29718		2.00029	1.46399		1.99081	1.93639	1.25298	3.44341	-0.467406		1.63124	0.634578		2.88967	6.09803	2.07694	4.79078	2.80132		3.73135	0.742766		2.97013	3.80036	0.661444	1.82817	0.618814		1.97579	0.628827		0.449557	0.685037	7.63522
181.673		-2.2756	0.555121	13.0462	1.42312	2.02252		2.95428	2.62838		-2.108	4.97083	1.3249	-3.96486	6.99263		1.4431	2.06292		1.44858	2.3226	1.74773	2.67952	-0.384306		1.56283	0.532111		4.55026	10.1776	6.75431	4.24932	10.6771		7.28173	1.35738		1.18205	1.90733	0.689347	-1.81704	-1.84719		0.0228971	0.781712		1.9092	-0.975407	2.30847
183.666		5.83647	0.742204	5.41427	-1.17483	4.41967		3.04756	1.38574		-1.07477	7.50792	1.5417	-0.465254	1.71754		1.84542	1.51722		3.82624	4.0177	3.98931	4.90175	1.79833		3.70667	0.512879		-1.8652	9.47482	2.16537	5.63497	9.99102		5.0802	2.24133		0.444693	0.514313	-1.05027	-5.28439	0.957373		-0.883655	1.15114		3.88023	2.34962	5.3784
185.653		1.36799	-0.33272	5.0139	-1.2796	1.895		1.33291	1.0832		1.31354	3.66558	1.97295	-0.331516	4.96764		2.31764	0.921535		0.816226	0.748686	1.83914	4.54028	-0.160634		1.55674	0.810306		1.68331	5.79587	3.20004	5.81162	4.06427		4.11102	0.789196		1.00781	-4.43524	-1.74665	-2.31638	-0.517023		-1.6015	0.909582		1.97416	-1.59727	4.24305
187.646		-0.396731	1.61151	7.95456	2.59496	3.77716		3.10829	1.39145		-4.32154	4.90628	2.22004	-1.2839	1.55176		0.614527	1.57867		-0.6715	6.1528	1.04704	3.9587	3.5327		2.80395	1.18838		0.657331	5.99383	0.469231	9.54703	9.60693		5.25487	2.02421		1.60851	0.640779	2.80215	-0.155421	1.9522		1.36964	0.515052		-0.764086	0.275944	1.24768
189.634		4.23106	0.817541	0.901011	2.06846	2.32927		2.06947	0.619379		0.121274	7.96393	3.79478	-3.14602	0.0464043		1.75608	1.90158		3.25549	-1.34278	2.33937	5.10094	0.0309729		1.8768	1.14636		0.511019	8.4405	3.15238	2.41454	7.0752		4.31873	1.48445		-0.0367471	-0.392457	-1.2016	-4.92089	-2.45122		-1.80058	0.883525		-0.864451	1.17636	4.52267
[truncated: 218 more rows]
[truncated: 26 more columns]
